# Supplementary material for: Can Vitamin C Intake and Physical Activity Individually and Jointly Lower Inflammation in Chronically Infected Populations? Insights from NHANES 2005–2018
Source: Research Square preprint supplement (doi:10.21203/rs.3.rs-6641016/v1), 2025-05-13
Supplement: Supplementary file 1 [file e75534399a2d5dcab90dd717.xlsx]

## Sheet: alldata0518
SEQN	ALQ101	RIAGENDR	RIDAGEYR	DMDEDUC2	INDFMPIR	RIDEXPRG	LBXHA	LBDHBG	LBDHD	LBXHCR	LBDHI	LBXHE1	LBXHE2	SMQ020	LBDLYMNO	LBDNENO	LBXPLTSI	DR1TKCAL	DR1TPROT	DR1TCARB	DR1TSUGR	DR1TFIBE	DR1TTFAT	DR1TSFAT	DR1TMFAT	DR1TPFAT	DR1TCHOL	DR1TATOC	DR1TRET	DR1TVARA	DR1TACAR	DR1TBCAR	DR1TCRYP	DR1TLYCO	DR1TLZ	DR1TVB1	DR1TVB2	DR1TNIAC	DR1TVB6	DR1TFOLA	DR1TFA	DR1TCHL	DR1TVB12	DR1TVC	DR1TVK	DR1TCALC	DR1TPHOS	DR1TMAGN	DR1TIRON
31131	2	2	44	4	4.65	2	2	2	2		2	2	1	2	1.9	2.9	298	1458	27.43	233.73	146.01	6.4	50.86	18.274	20.745	7.641	48	2.34	114	120	0	76	0	3477	85	0.752	0.886	8.369	0.385	299	75	91.6	1.03	47.3	23.4	401	483	144	7.04
31132	1	1	70	5	5		2	2	2					2	2.2	4.4	225	2168	75.81	269.93	111.54	20.3	60.16	17.608	17.494	19.114	138	20.19	314	813	51	5934	39	2572	373	3.703	3.849	48.134	4.502	801	569	318.8	8.92	124.8	48.7	1508	1180	314	30.51
31134	1	1	73	3			2	2	2					2	1.9	3.7	222	2159	67.11	299.8	140.26	16.4	79.3	23.41	30.854	19.074	480	4.66	339	374	0	417	8	9146	601	1.589	1.925	19.482	1.513	284	130	402.5	3.11	34.9	80.1	704	955	210	14.47
31144	1	1	21	3	0.46		2	2	2		2	1	2	2	2.1	6.3	225	2083	51.05	243.38	77.7	10.2	74.98	21.908	29.236	12.432	80	7.26	85	105	0	233	1	13386	66	0.98	1.198	15.531	0.881	260	130	177.4	1.89	11.5	56	848	962	290	11.65
31149	2	2	85	2	0.05		2	2	2					2	17.4	5.8	198	1164	43.46	147.99	72.39	8.1	46.01	14.898	18.905	8.231	100	3.79	341	394	25	502	0	10031	583	1.49	1.609	19.281	1.796	256	172	155.6	5.63	39.1	30.4	396	529	124	14.92
31150	1	1	79	3	1.22		2	2	2					1	1.2	4.5	237	2134	73.87	294.99	133.37	30.3	39.96	8.661	10.941	15.888	98	4.71	257	403	69	1487	536	3169	1257	1.934	2.539	26.993	4.985	663	320	383.9	8.14	342.2	48.4	985	1361	506	17.31
31151	2	2	59	3	3.03	2	1	2	2					1	1.6	1.7	261	1722	40.29	277.37	165.54	8.7	51.24	14.734	21.114	10.204	79	5.34	144	150	0	81	0	0	175	0.724	1.099	11.826	0.655	235	87	123.4	1.36	9.6	12.2	474	642	231	9.79
31152	2	2	27	3	1.76	1	1	2	2		2	1	2	2	1.7	7.4	342	2223	99.78	233.21	75.98	15.2	99.92	29.133	38.225	23.203	1103	10.01	530	820	583	3187	20	10435	3920	1.963	2.322	18.044	1.48	503	284	710.3	5.13	39.2	176.1	595	1333	263	17.17
31153	1	2	44	3	1.03	2	2	2	2		2	2	1	1	2.8	4.6	245	3454	152.28	455.55	241.68	66	140.06	28.978	63.043	40.404	36	49.6	2041	2085	49	362	280	9139	573	4.027	3.609	77.406	5.597	1292	256	452.7	10.48	427.8	35.9	3192	2550	1152	49.49
31154	1	1	62	3	1.56		2	2	2					1	2.5	3.6	293	1929	49.87	204.54	122.02	11.5	82.88	24.698	35.623	16.673	139	7.41	271	454	0	2209	2	2320	115	0.867	1.219	14.297	0.937	328	95	182	2.55	10.6	413.7	370	776	225	11.21
31155	2	1	38	5	3.5		1	2	2		2	2	2	2	1.7	2.5	286	2838	181.52	319.67	73.3	21	88.47	28.945	32.142	18.219	517	10.83	402	518	98	1361	11	22799	604	2.981	2.856	67.908	3.738	609	408	554.4	5.78	42.2	205.4	1214	2051	436	21.55
31156		2	43	4	1.19	2	2	2	2		2	2	2	2	2.2	2.7	240	1175	21.87	196.51	121.49	4.6	35.74	8.859	15.472	8.245	37	3.15	17	72	29	238	778	54	736	0.894	0.59	8.554	0.753	189	74	87.5	0.46	184.2	12.2	839	646	131	8.32
31158	1	1	71	4	3.71		2	2	2					1	2	5	292	2930	87.29	389.35	158.99	21.7	118.28	50.022	40.135	16.74	380	6.64	958	1388	1780	4203	69	0	1584	1.872	2.99	29.766	2.341	413	236	354.7	4.72	28.7	92.6	909	1472	267	18.37
31160	1	2	39	2	1.91	2	2	2	2		2	1	2	2	1.9	6.1	375	1793	69.31	209.32	77.94	15	76.44	23.788	22.274	23.313	174	4.58	192	228	123	345	39	4	901	1.145	1.73	20.781	0.785	264	94	222.4	1.24	115.1	72.8	540	901	248	11.62
31162	2	2	71	3	2.5		2	2	2					2	1.7	3.4	313	1937	60.13	202.04	75.64	17	104.21	32.614	37.709	25.455	520	6.77	540	576	37	359	59	0	951	0.97	1.738	10.831	1.175	198	26	332.5	3.7	97.5	52.2	842	1207	219	8.27
31164	2	1	54	4	5		2	2	2					2	1.6	4	244	2675	83.37	299.78	146.78	13.2	131.49	51.305	47.886	21.151	595	9.23	653	699	0	545	7	10025	323	1.682	2.184	21.823	1.594	297	134	433.2	4.87	29	45	831	1373	306	13.08
31167	1	1	37	4	4.16		2	2	2		2	1	2	1	2.6	5.9	337	2380	134.84	208.39	75.15	20	113.8	48.504	43.746	12.235	678	6.29	535	603	54	802	15	13471	817	2.059	3.308	24.116	2.011	338	103	534.5	6.26	48.6	74.9	1732	2046	382	15.41
31172		2	20	2	0.7	1	2	2	2		2	1	2	1	2.1	7.9	273	1105	37.18	172.51	75.74	9.8	31.41	12.023	12.22	4.463	65	1.62	138	149	0	153	4	649	48	0.769	0.699	6.71	0.423	196	146	104.1	1.38	19.7	13.8	481	482	143	6.95
31175		1	75	1	3.92		2	2	2					1	1.1	2	190	691	30.25	105.31	38.57	8.2	17.05	6.644	5.978	2.689	67	1.64	67	88	1	241	13	0	3129	1.157	0.751	7.951	0.843	122	71	114.6	1.03	35.5	12.1	205	467	144	5.17
31179	1	1	71	3	0.44		2	2	2					1	1.6	3.5	261	3715	122.77	519.2	287.11	31.4	134.81	52.605	48.3	22.812	227	12.8	1977	2053	185	414	831	0	1118	3.205	5.867	36.101	3.498	751	390	516.9	8.04	211.1	81.8	2837	3141	632	30.22
31183	1	2	33	5	3.9	2	2	2	2		2	2	2	2	1.2	3.7	294	2149	119.07	242.54	108.71	15.7	80.42	29.45	28.842	15.772	248	6.55	1032	1622	2146	5994	46	711	1541	1.751	3.364	40.382	2.45	493	250	363.4	6.88	52.8	149.2	1376	1878	449	14.26
31186	2	2	46	1	1.68	2	1	2	2		2	1	2	1	2.7	5.1	270	3315	107	386.39	222.41	17.1	155.48	48.036	59.92	36.266	418	11.98	464	991	476	5766	583	0	2422	2.08	2.371	27.651	1.959	427	124	427.2	5.47	196.7	95.8	995	1408	292	16.06
31187	2	2	22	4	4.29	2	1	2	2		2	1	2	2	1.6	3	293	2066	88.74	227.03	128.13	14.6	90.8	34.833	32.805	21.848	217	7.62	367	893	2041	5214	140	5415	1053	1.057	1.824	25.29	2.142	250	102	254	3.05	32	102.1	1037	1277	278	12.67
31190	1	1	72	4			1	2	2					2	2.5	4	237	1611	134.54	176.22	119.77	3.6	39.5	8.444	13.44	13.553	318	10.24	972	1001	16	95	486	0	405	1.869	2.18	26.671	2.184	313	154	547.9	10.16	159.2	60.3	1100	1919	398	12.86
31192	1	2	60	4	4.49		2	2	2					1	1.4	8.6	560	568	26.09	87.68	31.05	6.7	13.79	3.064	4.77	4.222	58	1.98	267	273	30	61	0	0	98	1.159	1.063	10.642	1.41	318	270	103.7	3.04	16.5	9.5	529	441	157	7.17
31193	2	1	51	1	1.01		2	2	2					1	2.5	6.8	304	2580	66.45	430.87	336.23	8.9	72.9	19.866	26.847	19.19	415	3.82	211	252	11	392	141	0	530	0.723	1.093	16.252	0.808	140	82	247.4	1.77	7.7	21.3	407	1207	111	12.11
31194	1	2	47	1	1.02	2	1	2	2		2	1	2	2	3.1	4.2	311	2448	79.55	354.45	74.4	28.1	81.12	27.855	31.097	16.003	116	6.25	243	264	30	256	2	11494	156	2.045	2.142	19.264	1.548	427	245	201.9	3.06	100.7	37.9	1364	1820	374	17.31
31195	1	1	73	4	5		1	2	2					1	1.6	6.4	336	2683	170.27	220.79	57.37	14.8	110.94	51.072	35.451	13.277	955	5.21	683	712	36	235	230	0	1305	1.966	2.542	28.763	1.704	304	99	732.1	12.85	47.1	23.4	1108	2166	437	16.92
31199	1	2	25	4	1	2	2	2	2		2	2	2	2	1.8	2.2	233	3353	109.74	554.16	135.79	64.4	89.02	21.054	23.415	32.806	59	25.45	747	1576	1859	8925	226	43146	6007	3.77	3.279	64.726	8.197	1072	541	343.5	5.83	232.7	369.7	1016	1979	730	31.98
31203	2	2	33	2	0.99	1	1	2	2		2	1	2	2	2.5	9.6	293	2062	94.46	279.8	187.36	19.1	68.39	24.836	23.455	12.417	568	6.17	427	602	217	1462	1072	4250	1332	1.816	2.679	26.049	2.696	458	86	477.1	5.14	531.3	23.8	1046	1542	364	14.01
31205	2	2	43	4	5	2	2	2	2		2	1	2	2	2.7	4.6	330	2960	122.62	318.85	106.8	29.7	137.25	45.323	49.993	28.649	450	9.3	809	890	114	941	19	8131	998	3.042	3.305	32.12	2.903	765	450	442.1	6.49	92.3	89.1	1846	1881	449	31.03
31207	2	2	20	4	0.1	2	2	2	2		2	2	2	2	2.1	2.6	390	959	28.91	135.84	58.57	4.4	34.18	11.67	12.245	7.357	111	2.75	67	84	4	205	7	7811	275	0.689	0.659	6.221	0.358	153	90	74.5	1	28.6	21.7	410	454	81	6
31208	1	2	47	5	5	2	1	2	2		2	1	2	2	1.9	2.6	285	1257	62.86	124.43	24.73	11.2	56.87	24.692	24.738	6.321	207	2.74	155	224	17	821	5	0	912	0.708	1.041	13.575	1.049	201	58	208.5	5.46	82.6	130.2	856	983	192	6.64
31210	1	1	33	3	1.04		2	2	2		2	1	1	1	2.1	6.5	328	3290	80.96	492.14	323.03	11.5	117.87	45.489	43.727	16.511	253	8.74	781	813	64	341	35	0	392	2.08	4.182	25.153	2.789	468	303	276	8.36	25.7	67.7	1312	1656	300	27.48
31212	2	2	23	2	0.48	1	2	2	2		2	1	2	2	1.7	4.8	236	4373	129.29	554.76	290.65	18.1	185.86	61.707	68.094	44.328	412	10.52	549	573	1	259	8	1504	162	2.458	2.416	30.582	1.962	431	257	367.4	6.28	43	98.5	2113	1949	452	23.01
31213	2	2	53	2	1.05	2	2	2	2					2	1.7	2.6	309	1807	47.59	266.63	104.23	17.1	65.79	22.649	24.965	12.988	67	5.65	971	1001	8	224	237	9258	246	2.128	2.446	25.692	2.336	479	375	113.3	5.6	65.6	26.7	886	913	249	17.65
31220	1	1	50	3	5		2	2	2					2	1.8	3	227	1947	53.24	289.3	169.64	21.9	73.5	17.425	22.309	24.555	95	9.1	772	923	35	1803	4	986	789	2.36	4.202	34.146	3.249	556	366	217.5	8.4	51.6	131.9	627	1283	346	24.35
31221	2	2	54	3	5	2	1	2	2					2	2.2	5.3	242	1319	112.32	118.78	41.58	16.6	45.87	15.042	13.708	11.499	476	3.62	209	609	1445	4011	131	0	2189	0.777	1.327	39.771	2.206	224	7	450.4	2	128.9	101.5	466	1225	260	8.29
31223	1	1	61	2	1.68		1	2	2					2	1.9	5.7	286	2627	96.74	292.3	88.23	14.1	116.13	28.746	39.11	38.439	484	8.46	236	273	23	430	25	553	873	2.511	2.692	34.506	1.791	578	328	372.6	1.76	110.7	141.7	598	1351	252	17.91
31227	2	1	64	5	5		2	2	2					2	1.3	3.7	147	1659	65.25	224.51	69.12	27.1	60.96	17.547	24.824	11.145	177	8.41	470	498	47	295	19	3691	664	1.51	2.091	22.82	2.036	694	489	275.3	5.95	112.1	39.2	925	1183	383	37.14
31228	1	1	34	2	1.68		1	2	2		2	1	2	1	2.1	3.2	262	2391	78.66	368.58	181.15	19.2	68.26	19.256	27.146	18.099	320	4.46	80	96	1	191	4	0	393	2.05	1.092	19.745	1.9	246	77	316.5	2.02	36.8	58.8	398	1315	302	12.36
31231	1	2	30	5	4.55	1	1	2	2		2	2	2	2	1.8	6.6	215	2137	77.66	230.87	87.94	25.9	108.58	33.178	32.991	32.252	98	11.88	473	1387	2494	9599	146	1909	4452	4.194	1.737	27.39	2.235	352	67	261.1	1.6	143.6	350	1396	1358	348	15.77
31232	2	2	56	3	1.17	2	2	2	2					2	2.2	5.1	369	4674	54.4	702.54	415.84	22.6	195.94	51.38	78.57	51.1	244	14.88	745	776	5	353	6	380	273	1.562	2.535	14.46	1.11	465	274	250.9	2.11	19.9	131.1	863	1638	217	13.95
31233	1	1	83	2	2.61		1	2	2					1	1.7	3.5	192	1045	58.45	135.68	48.75	13.4	38.17	11.049	16.552	7.061	495	3.59	458	509	8	486	239	255	1204	1.713	1.766	18.064	1.331	260	105	404.8	1.79	65.1	30.1	437	1035	234	16.19
31240	1	2	34	5	5	1	2	2	2		2	2	2	2	2.1	7.7	286	2144	73.11	256.29	139.22	16.1	97.64	26.256	46.027	19.999	156	12.18	706	881	449	1608	523	10124	2235	1.539	2.647	21.305	2.283	364	174	268.5	5.93	135.6	75.2	1671	1430	367	14.97
31241	2	1	40	2	2.73		1	2	2		2	1	2	1	2.8	5.8	474	1571	88.97	180.88	82.42	14.7	56.25	16.716	22.514	10.631	845	3.94	293	298	2	59	20	1704	597	0.724	1.508	18.922	1.47	251	38	606.9	4.5	2.1	28.8	479	1331	269	13
31242	1	1	58	5	5		2	2	2					2	1.6	4.4	208	2526	103.56	344.57	163.71	19.1	87.09	32.689	31.422	14.838	210	9.82	361	451	30	888	367	3674	583	1.773	2.466	29.5	2.893	503	323	345.1	8.42	104.1	47.6	859	1376	306	33.11
31244	1	1	23	5	2.16		2	2	2		2	2	2	1	1.7	2.6	141	960	46.25	131.78	71.04	7.5	28.86	8.74	9.646	7.791	124	3.89	504	595	35	650	785	5013	1179	1.137	1.152	16.093	1.492	306	150	167.6	1.5	205.6	58.1	467	717	194	11.45
31248	1	1	21	1	0.65		1	2	2		2	1	2	2	2.8	2.3	369	1893	73.4	167.35	55.16	7.7	67.68	25.627	30.901	5.245	204	2.99	102	155	9	619	13	9361	501	0.45	0.932	18.045	1.784	216	24	332.2	5.92	5.7	52.1	558	1098	232	8.77
31252	1	1	35	4	3.62		2	2	2		2	2	1	2	2.7	4.1	242	2571	68.27	328.38	185.77	15.5	113.54	33.9	41.701	28.411	443	9.63	489	809	114	3619	237	1750	4084	1.677	2.23	23.809	2.285	518	212	374.4	2.34	126.8	270.2	511	1014	284	15.05
31254	1	1	30	1	0		1	2	2		2	1	2	2	2.2	5	206	3952	168.9	517.4	59.88	64.3	133.69	37.548	57.602	27.362	1005	9.4	380	410	53	330	19	1318	836	4.23	3.176	35.727	2.87	1192	531	847.7	4.86	54.2	87.8	1293	2396	519	39.93
31255	2	2	34	2	1.86	1	1	2	2		2	1	2	2	1.6	5.8	239	3213	122.73	439.06	176.07	29.9	111.33	45.606	44.685	11.912	273	7.43	228	342	36	932	818	24017	912	3.112	2.567	30.502	2.389	698	406	365.5	7	205.6	61	2092	1799	405	27.32
31257	1	1	70	4	1.21		2	2	2					2	13.2	3.1	74	2411	127.26	174.22	71.05	13.9	136.04	72.521	40.173	11.154	1080	5.04	831	1066	725	2434	84	17520	1256	1.702	2.898	27.943	1.778	345	115	632.4	4.53	51.3	40.4	1411	2052	238	14.37
31258	2	1	20	2	1.43		2	2	2		2	2	2	2	2.4	4.3	314	3166	161.7	366.46	189.91	52	128.26	35.196	57.6	23.29	319	20.52	0	201	119	2247	194	61638	1152	1.431	1.789	44.837	3.211	406	86	592.4	9.71	110.9	92.4	712	1906	559	32.98
31259	2	2	35	4	1.93	1	1	1	2		2	1	2	2	1.6	3.6	243	1910	67.1	311.96	208.57	12.8	46.93	13.202	15.329	12.648	685	6.43	480	611	109	763	1572	1295	2962	1.849	2.31	16.729	2.853	579	163	529.1	3.71	572	36	1961	1099	320	17.29
31261	1	2	49	4	3.48	2	2	2	2		2	2	1	2	2.5	1.6	299	1951	72.01	245.74	107.75	17.9	64.33	19.535	23.035	14.915	159	7.73	735	737	0	30	1	0	159	2.294	3.462	44.705	3.731	590	436	261.6	8.64	8.2	37.4	768	1250	371	28.15
31262	1	1	52	1	2.43		1	2	2					1	2.3	3.3	239	1321	44.51	184.73	69.76	15.1	46.63	10.828	24.223	8.983	77	9.99	129	163	51	394	12	10152	252	1.1	1.18	12.362	0.79	333	188	144.2	1.02	40.6	30.1	530	727	218	10.22
31263	1	2	78	1	1.74		1	2	2					1	1.9	3.9	234	778	47.73	112.28	44.01	10.5	16.95	5.098	6.879	3.027	103	3.05	362	660	1147	2966	100	0	765	0.83	1.105	16.246	1.557	229	160	168.7	3.6	36.8	44.4	276	570	158	14.03
31266	1	1	62	3	2.04		2	2	2					1	1.3	3.7	340	2365	72.54	176.83	99.99	9.7	116.06	33.541	40.306	34.741	814	11.64	281	379	98	1044	108	1935	863	1.524	2.397	11.684	0.958	282	100	417.3	2.53	201.6	125.1	740	1050	284	12.16
31268	1	2	40	3	0.38	2	2	2	2		2	1	1	1	3	5.5	294	762	27.91	105.07	34.39	8.4	27.87	9.844	8.816	6.294	459	3.91	280	885	2591	5901	148	4012	1031	0.689	1.624	6.259	0.667	340	66	293.4	1.6	25.8	32.3	408	520	203	8.44
31273	1	1	62	2	3.9		2	2	2					2	2.1	3.8	202	2457	118.52	220.54	97.64	11.3	96.41	31.773	37.197	17.819	652	9.63	321	345	2	296	9	5019	423	1.754	2.403	35.471	3.091	308	27	665.1	8.4	7.7	47.1	597	1474	331	14.5
31274	1	1	56	3	1.88		2	2	2					1	2.3	5.5	255	1479	41.88	170.94	106.95	4.5	71.8	30.651	22.998	13.508	102	4.11	39	50	5	111	11	1671	99	1.126	1.946	12.404	0.677	124	27	192.3	2.8	10.7	31.6	193	957	158	5.98
31276	1	1	36	5	5		2	2	2		2	2	2	2	3.2	7.1	329	2152	70.58	323.38	208.53	17.9	68.16	18.764	23.168	20.496	165	8.01	237	313	46	583	611	0	2378	0.764	0.749	22.602	1.479	345	183	229.7	0.64	143.8	46.7	256	734	209	9.15
31277	1	2	61	5	5		2	2	2					2	1.4	3.8	271	2235	111.77	138.3	50.19	12.7	80.45	36.542	27.175	10.625	395	3.23	442	488	20	366	374	2664	675	2.241	2.007	21.796	2.274	182	9	393.9	3.75	145.1	28	1566	1784	290	12.69
31278	2	1	65	1	4.17		1	2	2					1	3.4	4.8	284	1182	42.37	172.17	28.48	27.8	39.64	11.573	14.113	7.719	210	4.16	119	119	0	25	6	0	148	0.58	0.892	6.955	0.943	336	0	218.9	1.5	2.4	12.2	543	1286	318	9.95
31279	2	2	76	2	1.17		2	2	2					2	2.4	3.3	308	2235	40.36	303.56	205.64	9.6	102.16	46.416	27.474	19.897	517	9.9	513	747	48	2799	9	11062	4485	0.924	1.566	12.767	1.159	276	94	287.1	1.89	107.3	218.3	581	778	216	12.15
31280	1	2	60	3	2.3		2	2	2					1	2.5	2.9	300	1719	45.26	332.54	172.16	16.5	9.39	2.008	2.896	2.724	63	2.45	14	32	0	206	15	6641	341	1.221	0.554	22.505	1.648	353	283	133.6	0.36	29.4	13.3	253	757	240	13.72
31284	1	1	80	5	5		1	2	2					1	1.4	4.9	348	1674	65.8	151.02	25.51	13.7	75.69	21.609	35.269	14.119	131	5.07	221	263	46	318	324	0	1888	2.156	1.087	20.156	1.465	258	51	262.1	1.8	27.7	36.4	249	901	243	9.61
31285	1	2	57	5	3.57	2	2	2	2					2	1.8	3.5	211	1727	81.61	174.84	83.28	18.8	80.04	23.686	28.204	19.228	569	6.19	213	388	587	1774	66	11654	686	0.976	1.635	16.361	1.421	283	110	468.6	5.98	67.8	138.1	660	951	200	15.73
31286	1	1	27	4	0.9		1	2	2		2	1	2	2	2.2	2.6	216	5123	264.25	447.89	115.28	30.4	251.17	110.557	81.558	42.093	1065	14.39	1545	1641	91	1144	20	8963	634	3.024	4.726	43.902	2.306	577	351	636.7	8.56	72.1	99.5	3935	4234	591	31
31291	2	1	52	4	4.29		2	2	2					2	1.5	2.6	266	2318	124.75	239.87	174.03	19.3	100.77	28.236	29.766	31.065	319	11.13	470	623	282	1666	22	6285	939	0.934	2.153	42.197	2.868	214	6	409.5	4.01	55.1	141.7	1191	1578	380	10.59
31294	1	2	73	4	3.12		2	2	2					2	1.9	6.7	261	958	50.66	121.89	53.22	4.9	30.09	14.308	10.062	2.88	89	1.64	403	429	47	282	9	1029	261	1.258	2.268	18.269	1.725	271	170	176.3	6.74	35.4	15.9	938	917	203	13.83
31297	1	2	85	3	5		2	2	2					1	1.4	3.5	323	1096	61.06	117.34	30.99	10.2	44.64	20.428	13.255	6.878	176	2.8	567	581	5	98	13	0	322	1.319	1.922	25.185	2.2	362	279	273.2	6.73	15.3	26.1	535	909	153	17.42
31298	1	2	33	4	2.83	2	1	2	2		2	1	2	2	1.6	5	418	2152	105.57	278.38	147.01	29.8	72.76	26.841	23.988	15.801	231	6.22	387	1399	4035	9958	266	19922	1558	1.388	2.273	32.663	2.32	344	50	332.9	2.54	166.9	64.9	1096	1499	386	12.62
31301	2	1	66	2	2.07		2	2	2					2	2.3	3.7	227	1546	68.78	151.73	74.23	10	75.77	21.817	22.3	25.981	125	5.99	172	241	77	466	642	0	917	1.183	1.093	26.106	1.256	348	68	196.7	4.81	240.8	63.6	606	846	175	8.51
31302	1	2	24	4	2.4	1	2	2	2		2	2	2	1	2.2	10.9	211	2802	73.63	401.68	187.98	20.5	105.37	37.761	40.624	20.06	251	9.71	464	506	38	286	372	835	611	1.842	2.15	20.612	1.466	471	232	327.2	2.58	99.2	45	1277	1591	377	18.54
31303	2	2	33	1	1.71	2	1	2	2		2	1	1	2	3.2	3.6	305	1265	52.95	165.97	72.43	12.6	44.51	13.367	15.622	12.116	127	4.58	221	222	0	1	0	1	35	0.609	0.632	11.506	0.555	244	95	155.3	1.43	1.2	26.5	367	578	204	10.3
31304	1	1	53	1			1	2	2					1	3	5.6	335	1774	73.04	278.27	177.78	14.4	45.9	19.219	15.637	7.158	197	3.74	959	1177	752	1889	137	9856	1235	2.419	3.456	39.899	4.361	499	340	269	10.46	105.6	30	958	1127	255	25.73
31307		2	77	3	4.17		1	2	2					2	3	3.5	220	918	37.07	106.59	45.05	3.9	38.18	12.184	13.334	8.647	455	3	668	675	4	59	46	0	400	1.358	2.06	16.458	1.577	473	384	284.4	6.76	41.3	14.5	484	630	95	19.05
31308	1	1	59	4	3.66		2	2	2					1	2.1	4.5	222	3159	121.66	326.07	177.17	11.6	76.41	24.088	28.941	14.779	528	5.32	279	396	286	796	885	12714	1459	1.117	1.778	43.017	3.857	345	22	597.1	2.47	256.8	70.7	1251	1365	391	12.34
31309	1	1	60	1	0.75		1	2	2					1	2.4	4.8	256	1086	56.07	73.21	7.14	4	62.56	17.432	26.155	13.107	204	6.38	251	351	309	1047	4	743	649	0.635	0.711	11.112	0.688	170	105	215	3.84	14.1	47.5	255	498	95	9.2
31314	1	1	28	4	5		1	2	2		2	2	2	2	2.2	3.7	280	4235	271.69	278.02	156.91	25.6	233.57	79.849	96.403	40.028	1157	18.35	1753	1802	75	620	41	0	1240	2.287	5.867	41.736	4.233	519	0	1255.3	19.8	225.3	49.4	3380	4417	755	23.53
31317	1	1	24	4	0.21		2	2	2		2	2	1	2	1.9	1.6	254	3954	83.92	610.74	412.71	13	140.64	30.387	58.975	40.269	854	11.54	432	512	54	859	182	3684	1203	1.687	2.477	17.081	1.288	552	172	569.3	6.88	127.1	137.3	764	1245	296	24.34
31321	2	2	25	4	2.03	1	1	2	2		2	1	2	2	1.1	8.1	285	1897	80.76	307.25	185.82	15.3	41.09	15.692	13.35	8.235	166	2.19	418	422	0	88	15	0	355	1.6	2.483	20.944	1.564	259	113	286.5	3.85	134.6	21.8	1270	1529	310	11.85
31323	1	1	83	1			1	2	2					1	2.7	4.7	180	1226	42.34	177.4	96.13	9.6	42.1	12.634	19.825	7.612	52	3.25	357	437	2	940	62	65	2065	0.84	2.215	11.509	1.083	249	76	227.9	2.99	100.9	242.5	796	918	206	7.79
31324	2	2	47	4	3.9	2	1	2	2	1	2	1	1	2	1.9	2.6	385	2996	142.03	394.52	238.43	29.9	102.22	38.266	41.47	16.983	350	3.28	295	354	15	701	18	7379	268	2.016	2.184	32.779	2.267	268	81	513.5	8.51	52.1	57.4	998	1664	370	25.57
31325	1	1	27	2	1.63		2	2	2		2	2	2	2	3.5	7.7	337	2946	111.29	397.26	173.45	11.2	100.19	40.549	33.08	12.262	391	4.45	416	441	47	298	3	12042	1294	3.462	4.732	47.698	3.441	2084	1927	354.9	8.01	8.3	29	1554	1709	285	39.53
31332	1	1	68	2	2.49		2	2	2					1	1.4	5.4	194	2631	107.11	299.09	109.24	13.9	112.75	36.215	40.108	26.209	225	9.61	529	595	64	747	57	17332	563	1.939	2.274	39.588	2.616	393	239	220.7	6.78	56.4	80	1224	1533	229	22
31333	2	2	29	4	3.12	2	2	2	2		2	2	2	2	1.2	4	241	874	72.2	69.29	36.16	2.5	34.15	5.552	10.834	14.309	189	5.61	122	123	0	45	4	0	179	0.634	0.521	24.93	0.787	50	10	338.1	7.8	202.7	24.2	543	870	222	3.85
31334	2	2	55	5	0.31	2	2	2	2					2	1.5	2.5	198	1520	26.6	230.33	164.22	11.8	60.2	25.226	18.413	11.065	154	5.18	356	427	121	589	348	754	707	0.734	0.92	4.543	0.538	266	66	133.4	0.99	68.4	61.1	504	639	126	6.14
31336	1	2	23	3	1.51	2	1	2	2		2	1	1	1	2.2	5.9	273	2346	74.75	279.58	129.92	11.8	95.36	30.665	44.574	14.005	159	3.36	61	83	23	252	3	1706	206	1.411	1.163	17.785	1.085	332	160	258.2	4.13	45.8	67.8	519	858	187	13.8
31337	1	1	54	4	5		2	2	2					1	1.5	2.7	292	2693	110.69	312.5	131.13	22.9	115.05	51.432	37.931	15.846	330	6.4	1024	2027	4222	9911	15	0	1767	4.186	4.847	46.119	4.556	690	497	422.1	12.52	85.3	78.7	1533	2042	391	28.67
31339	2	2	85	2	4.46		1	2	2					2	1.6	3.5	278	1226	26.89	184.53	56.61	6.4	44.05	13.212	14.177	14.012	108	5.85	127	170	19	482	65	0	643	0.89	1.023	8.126	0.83	273	157	151.9	0.97	160.2	83.6	422	440	133	8.14
31343	1	2	61	4	5		1	2	2					2	3	4.3	361	2014	97.16	255.55	61.56	24.2	67.52	24.273	23.462	12.458	271	11.09	540	689	167	1604	199	27180	1034	2.548	2.661	36.117	2.265	872	636	297.2	7.17	76.8	190.4	1302	1455	346	27.79
31344	1	2	55	5	5	2	1	2	2					2	1.6	3.2	186	1331	55.23	171.04	74.38	13.3	55.99	18.145	16.619	16.912	150	4.57	427	589	24	1826	163	6660	2568	1.284	1.895	22.02	1.849	384	216	226.2	6.47	83	173.9	617	809	213	21.54
31345	1	2	67	2	2.5		1	2	2					1	1.2	3.7	232	1039	31.13	161.2	61.94	18.6	32.31	10.136	12.189	7.646	52	2.03	42	413	73	4412	3	3535	156	1.08	0.6	6.832	0.521	389	99	119.6	0.17	85.7	18.1	238	423	203	7.1
31348	2	1	62	2	5		1	2	2					1	1.3	2.3	202	1136	54.41	157.56	80.5	7.4	34.71	7.621	10.391	13.712	159	2.61	375	441	224	672	19	3342	264	1.332	2.141	21.065	2.676	328	204	169.8	6.57	42.2	55	464	660	159	14.97
31350	1	2	27	3	1.9	1	1	2	2		2	2	2	1	1.7	8.8	120	2639	105.89	195.68	76.86	8.3	158.91	59.546	54.179	29.874	621	8.69	569	609	4	493	6	0	619	1.399	2.095	22.501	1.846	313	148	425.6	5.73	15.3	90	1129	1574	188	14.21
31358	2	2	62	4	0.72		2	2	2					2	1.5	3.7	318	1147	44.52	130.08	63.78	6.6	50.74	15.648	18.151	11.851	311	5.82	249	298	20	292	517	2604	814	0.892	1.244	11.984	1.103	255	69	253.8	5.19	140.8	42	938	804	176	9.35
31361	2	2	30	4	1.19	1	2	2	2		2	2	2	2	1.4	6	179	2353	71.96	358.52	212.5	14.5	75.86	31.431	27.075	12.352	230	8.45	660	815	165	1769	44	1839	2001	1.157	2.22	13.09	1.397	283	78	232	4.39	117.3	184	1427	1561	333	8.89
31367	1	2	85	3	2.2		1	2	2					2	1.5	4.3	210	607	32.32	73.23	15.54	3.8	19.5	4.302	7.906	5.293	76	2.18	160	238	28	891	69	515	122	0.866	0.5	8.999	0.58	144	61	118.4	1.23	35.7	18.9	226	472	133	5.35
31372	1	2	48	4	3.66	2	2	2	2		2	1	2	1	1.7	6.1	243	2557	120.88	275.07	71.92	19	112.34	37.505	42.033	21.282	347	7.36	233	261	8	228	267	743	1038	2.108	1.753	30.208	2.498	493	108	435	8.19	118.4	62	614	1794	291	19.02
31379	1	2	79	2	0.75		1	2	2					2	2.5	2.2	159	1879	95.22	187.5	126.25	12.6	86.49	22.424	35.138	20.65	280	7.48	458	635	23	1585	987	0	4321	0.779	1.097	28.753	1.619	203	70	270.7	1.31	164.9	50.4	300	782	203	11.24
31380	1	1	69	2	2.02		1	2	2					1	2.4	4	255	1174	49.48	161.24	65.86	13.6	29.29	13.742	9.269	4.887	121	0.88	134	149	0	198	0	1849	87	0.626	0.892	9.838	0.623	171	73	223	2.58	8.7	9	770	932	211	13.71
31381	1	2	34	2	2.41	2					2			2	2	3	258	741	18.08	61.1	32.15	2.6	48.27	26.62	12.314	5.854	82	0.87	105	108	0	45	0	835	19	0.284	0.488	4.179	0.179	66	36	66.4	1.11	2.4	3.6	226	262	51	3.2
31382	1	1	61	4	5		1	2	2					2	1.7	4.7	278	2418	115.75	219.46	73.49	21.5	104.99	27.38	36.4	31.246	684	9.07	243	399	577	1261	640	0	715	2.482	2.288	25.425	2.849	410	66	577	2.74	107.5	125.4	488	1436	320	13.47
31383	1	2	27	3	4.22	2					2			1	1.7	3.9	331	1892	57.78	212.25	48.64	10.5	90.69	24.507	34.629	25.831	178	7.61	196	359	3	1936	4	4986	2543	1.54	1.439	15.52	0.686	392	233	154.1	2.62	25.1	181.8	897	851	167	21.49
31386	1	2	45	2	1.81	2	2	2	2		2	1	1	1	2.1	13.4	424	1512	38.51	140.17	6.75	2.9	23.15	8.358	8.802	3.881	57	1.29	34	41	0	78	0	4420	44	1.157	1.737	20.932	1.434	268	91	305.9	1.31	3.8	8.8	621	731	246	5.71
31387	1	2	40	3	0.48	2	1	2	2		2	1	1	1	2.8	3.5	288	877	39.45	129.54	56.58	5.5	22.66	9.26	8.21	2.412	88	2.92	59	273	710	1810	806	9291	799	0.831	0.788	10.794	0.989	211	72	148.7	2.14	198.5	20.7	346	565	121	9.32
31388	1	2	60	3	2.4		2	2	2					2	2.3	6.4	232	1587	58.07	153.33	24.44	12.9	85.49	24.527	37.072	17.527	84	9.59	369	385	0	199	0	11026	134	1.338	1.763	12.426	0.542	236	114	147.2	2.27	61.7	38.2	1158	1303	303	10.96
31393		1	70	1	0.7		1	2	2					2	1.7	6.2	257	1193	84.16	147.19	51.47	17.2	30.72	7.452	9.306	9.934	221	4.92	62	258	361	1900	475	8234	1383	1.179	1.294	20.286	1.701	345	47	284.7	0.88	158.3	78	819	986	300	11.26
31396	1	2	55	4	3.51	2	1	2	2					2	3	3.1	242	1220	75.32	71.88	16.62	4.1	45.27	15.46	15.079	10.353	395	4.24	282	310	0	346	7	1681	449	1.135	1.636	19.477	1.029	173	70	376	8.09	23.7	23.7	637	1138	189	7.8
31399	1	1	59	4	3.67		1	2	2					1	2.8	4.1	201	2202	85.84	295.15	155.11	12.6	75.94	22.724	30.606	14.497	231	4	567	608	22	371	212	0	511	1.811	2.192	27.142	2.44	363	154	282.8	10.21	220.6	47.9	615	1050	252	20.09
31400	2	2	78	4			1	2	2					1	2	6.3	268	1385	39.64	226.22	113.55	16.9	40.54	7.116	15.928	14.397	104	5.47	134	179	7	552	6	611	1035	0.726	0.909	9.374	0.693	227	105	159.6	1.85	15.8	38.3	219	421	109	9.49
31403	2	2	21	4	2.79	2	2	2	2		2	2	2	2	4.6	2.8	328	528	27.53	93.11	68.77	3.3	5.62	1.528	1.913	0.727	59	3.01	3	85	39	376	1152	10870	914	0.671	0.444	7.707	1.042	194	38	142.8	1.13	272.7	13.8	82	292	121	6.6
31407	1	2	64	5	4.13		1	2	2					1	2.8	5.7	357	1900	92.33	190.56	110.29	14.9	89.52	40.569	24.958	14.804	639	6.74	322	434	65	1248	166	10870	873	2.214	2.718	20.644	1.572	229	19	566.6	3.88	45.7	61.9	626	1449	271	11.52
31410	1	1	42	5	3.54		2	2	2		2	2	2	2	1.8	2.4	261	3192	108.09	425.73	129.88	18.3	112.97	43.42	36.604	22.387	262	6.83	682	737	9	651	21	14858	275	2.905	3.498	30.604	1.455	646	442	295.9	4.88	38	66.9	1649	2164	284	21.09
31413	1	1	34	3	1.9		1	2	2		2	1	2	1	2.3	2.1	350	3002	110.99	250.53	84.13	19.1	178.39	35.469	84.998	47.186	234	23.59	53	88	10	401	24	2110	427	1.45	2.111	34.999	1.794	244	149	265.9	1.41	73.1	51.3	531	1977	406	13.32
31415	2	2	23	1	0.85	2	1	2	2		2	1	2	2	2	3.1	350	2669	61.99	469.12	218.92	31.9	70.88	14.055	28.025	23.644	399	6.46	187	200	2	142	27	0	620	2.187	1.707	14.945	1.121	620	229	360.7	1.15	39.5	83.4	521	1200	262	17.72
31425	1	2	63	4	4.73		2	2	2					2	3.2	3.9	392	1609	61.14	181.84	116.44	10.8	75.87	15.142	33.975	21.988	99	8.12	65	93	33	256	120	1656	274	1.438	0.709	22.416	1.317	233	50	213.1	1.8	55	39.1	337	834	246	7.73
31429	1	1	40	2	2.61		2	2	2		2	1	2	2	2.9	4.8	275	1877	97.08	175.94	81.93	9.3	87.55	21.396	31.702	29.157	267	6.15	96	101	18	55	10	0	400	3.509	1.324	28.189	2.143	127	47	396.7	2.46	22.1	38.1	282	1309	201	9.2
31432	1	2	45	5	5	2	2	2	2		2	1	2	2	1.9	3.7	365	1078	57.42	64.58	22.34	5.5	42.49	8.717	11.71	18.734	237	5.58	83	215	304	1425	24	4120	772	0.532	0.63	19.72	1.293	188	38	213	1.28	25.3	94.7	361	630	157	6
31434	1	1	57	1	1.18		2	2	2					1	2.5	6.9	264	2353	87.63	260.13	95.4	14	107.42	39.617	46.321	12.807	216	4.55	126	167	20	480	32	16690	256	1.564	2.282	21.861	0.867	387	227	219.4	5.49	20.5	37	1079	1413	233	17.04
31435	2	1	38	3	2		1	2	2		2	1	2	2	1.6	5.1	205	267	6.24	38.4	28.56	4.9	11.48	3.345	2.527	3.595	12	2.16	29	449	1338	4323	60	1216	2068	0.2	0.534	2.003	0.338	76	0	32.4	0.21	50.4	103.2	166	163	57	1.44
31437	1	2	59	4	1.39	2	1	2	2					1	5	3.6	334	3157	88.69	324	29.5	25.4	91.91	25.348	31.804	27.949	133	7.82	160	183	19	267	4	9177	523	2.059	2.504	28.321	2.087	726	185	465.5	2.88	30.8	72.1	1161	1721	450	16.4
31439	1	2	31	5	3.11	1	2	2	2		2	2	2	2	1.4	7	336	2289	130.9	171.59	63.58	32	130.06	39.531	54.683	26.543	256	14.96	450	616	58	1934	92	612	2513	1.408	2.385	34.572	2.728	689	54	477.6	6.57	86.9	192.9	1428	1865	397	14.89
31440	1	1	30	4	5		2	2	2		2	2	2	1	4.7	4.5	254	1165	43.45	111.36	33.65	5.8	39.83	11.594	17.074	7.138	124	2.13	9	28	52	200	3	528	190	0.582	0.897	13.994	1.31	187	71	215.3	3.44	15	19.7	260	491	147	6.49
31441	1	1	62	4	4.24		1	2	2	1				2	1.7	3.3	376	949	59.94	94.4	33.62	5.8	39.19	9.653	16.182	9.363	182	3.99	223	230	29	74	5	4	52	0.773	0.919	10.351	0.92	134	37	206.7	3.63	15.6	18.9	392	1423	147	6.74
31442	1	1	67	4	1.8		1	2	2					1	2.8	6.8	289	2359	67.27	367.33	226.25	17.7	71.84	24.476	26.386	12.555	184	4.66	87	231	452	1474	74	1102	1116	1.482	1.807	20.446	2.324	224	61	284.5	4.59	50.7	75.8	580	1238	276	12.41
31447	2	1	85	3	0.71		2	2	2					2	1.1	5.7	260	2020	79.63	305.91	172.99	29.8	62.11	24.086	17.852	15.409	162	10.85	1276	1504	748	2322	125	0	6048	3.897	5.544	55.211	5.826	996	741	348.7	15.34	211.8	81.7	1363	1742	454	41.21
31452	1	2	54	5	3.2	2	2	2	2	1				1	2	4	292	1316	46.45	195.49	97.85	11.8	52.12	25.268	12.701	9.436	181	4.58	260	296	60	361	90	0	276	0.563	1.17	18.306	1.237	183	67	147.5	3.31	26.8	42.8	589	842	222	7.46
31454	1	1	75	1	0.43		1	2	2					1	2.8	4.7	257	1261	55.62	156.83	31.67	7.1	45.1	13.847	17.168	10.86	143	2.57	73	90	17	204	0	386	137	0.989	0.709	24.8	1.074	231	188	140.3	0.82	4	25.7	228	765	153	8
31457	2	2	61	3	4.7		1	2	2					2	1.7	2.5	301	2396	122.09	267.74	94	20.3	93.78	32.102	32.637	21.7	523	7.51	1770	1856	188	956	6	7	1147	1.797	2.973	35.374	3.496	679	384	447.8	10.36	50	108.6	1378	1631	359	21.62
31460	1	1	37	4	1.24		1	2	2		2	1	1	2	2.1	2.6	309	2267	98.7	233.05	114.46	7.6	105.63	39.77	37.393	15.149	269	5.94	195	213	0	233	5	3676	152	1.887	1.668	24.99	1.631	246	137	305.7	6.16	13.3	26.3	757	1354	201	12.83
31464	1	1	64	5	5		2	2	2					1	1.8	4.9	198	1769	85.12	153.21	43.05	7.8	75.66	29.972	30.784	7.305	251	3.53	165	210	18	278	507	3908	487	1.111	1.248	22.281	1.719	293	102	295.8	5.36	133.4	21.2	485	935	197	12.58
31469	1	2	74	5	5		2	2	2					1	1.3	4.7	287	2420	112.52	313.08	145.03	25.1	85.58	29.204	31.475	18.22	353	11.03	658	1155	754	5395	366	23248	5594	1.758	3.309	34.631	2.305	593	141	470.5	6.13	151.9	297.2	1841	2031	481	18.28
31470	2	2	26	3	0.68	2	1	2	2		2	1	2	2	2.6	3.3	401	1523	93.85	164.22	99.48	9.9	54.31	20.148	21.723	4.173	224	2.3	26	26	0	3	0	0	16	0.746	0.693	21.77	1.556	214	58	342.3	4.4	39	19.6	277	925	175	10.34
31471	1	2	49	2	3.27	2	1	2	2		2	1	1	1	3	3.6	305	2450	74.65	279.49	74.04	14.5	64.77	19.483	25.767	14.07	484	2.9	242	272	51	320	23	528	491	1.548	2.326	29.591	2.027	494	206	516.6	2.34	27.3	38.6	636	1162	316	12.97
31472	2	1	76	4	1.43		1	2	2					1	1.8	4	214	3598	105.5	429.18	235.33	13.9	166.94	59.94	71.109	24.143	418	7.56	5260	5281	0	253	29	0	347	2.217	5.359	33.522	1.331	455	253	587.5	26.51	7.6	34.7	1816	1913	292	28.07
31483	1	1	50	4	5		1	2	2					2	2.1	4.7	259	2168	71.84	314.03	78.74	23.9	69.7	24.224	28.881	11.435	108	4.11	457	509	26	251	734	0	715	2.396	2.99	21.157	1.623	549	251	257.9	2.95	178.5	48.4	1435	1497	312	19.01
31486	2	1	50	2	3.9		2	2	2					1	2	2.4	326	2504	124.86	184.56	82.89	10	141.11	59.092	56.994	14.079	391	8.71	480	526	1	562	4	13366	94	1.238	3.844	28.456	2.364	262	52	479.9	11.76	32.3	44.8	1205	1778	336	14.28
31488	1	1	38	4	1.5		2	2	2		2	2	2	1	1.9	2.7	370	3141	124.02	350.35	96.04	21.8	140.61	48.58	55.045	18.237	390	10.33	447	1220	3305	7602	2	13091	974	1.986	3.478	33.907	2.902	431	208	510.2	7.8	28.7	75.1	937	2192	397	20.24
31491	2	2	46	4	5	2	2	2	2		2	1	2	2	1.4	2.7	375	2845	110.82	408.08	270.67	14.4	88.22	33.522	33.811	13.441	428	5.76	368	1090	116	8605	30	0	10208	2.069	2.218	23.781	1.889	414	235	466.3	4.03	30.6	600	939	1574	269	17.05
31496	1	2	51	4		2	1	2	2					2	1.7	4.1	228	1905	42.56	238.67	121.42	12.7	91.85	23.839	32.41	27.417	279	11.03	237	356	124	1168	360	7685	1073	1.349	1.861	12.134	0.806	344	139	226.8	1.31	128.9	119.7	693	821	201	11.54
31497	1	2	50	3	1.88	2	2	2	2					1	1.9	4.3	312	2763	48.4	474.92	360.47	8	80.04	17.939	33.639	22.171	235	6.6	337	437	314	1056	3	2173	268	0.744	1.129	13.317	0.66	247	186	214.2	3.3	8.6	55.9	566	1142	192	11.4
31498	1	2	63	1	1.33		1	2	2					2	3.2	4.2	316	1864	84.33	234.11	100.09	12.5	66.8	21.983	23.585	14.127	425	4.83	271	463	763	1932	29	2578	627	1.393	2.285	19.629	1.286	309	152	341.2	6.04	33.8	41.6	673	1274	259	11.9
31501	1	1	34	4	0.9		2	2	2		2	2	2	1	3	5.5	404	1869	65.15	224.52	144.02	3.9	69.86	26.606	21.965	15.847	178	2.95	691	717	45	308	1	1029	174	1.51	2.792	19.126	2.636	494	415	210.5	9.51	34.9	27.1	1021	1142	138	19.88
31503	1	1	47	4	1.49		2	2	2		2	2	2	2	1.5	3.1	207	2028	78.04	190.71	50.52	14	92.06	17.27	23.768	38.568	233	7	72	207	372	1414	30	116	1842	1.313	1.374	24.779	1.209	378	216	247.6	1.03	47.2	127.1	303	921	244	13.03
31504	1	1	46	5	5		2	2	2		2	2	2	1	2.7	5.6	172	3020	143.64	260.05	59.34	15.2	76.43	27.263	30.722	11.52	366	5.64	308	393	313	866	5	0	163	2.657	2.163	42.504	2.851	503	274	582.2	5.54	4.1	43	685	1606	368	24.83
31506	1	1	73	1	1.29		1	2	2					1	2	1.9	197	941	33.79	149.22	80.45	13.9	26.82	9.281	9.077	5.949	84	2.81	252	297	25	400	261	254	570	0.849	1.313	10.441	1.515	203	94	150.6	4.19	117.7	41.4	531	664	184	18.66
31508	1	1	73	2	1.47		2	2	2					1	1.5	3.6	350	2894	77.29	395.34	252.34	8.5	113.57	37.52	44.222	25.109	798	9.03	455	488	16	363	46	0	923	1.61	3.612	21.668	1.644	430	230	542.9	6.26	7.8	71.6	639	1170	248	15.38
31509	1	1	35	4	0.94		2	2	2		2	1	2	1	3.8	2.9	226	4459	262.92	402.99	245.63	34.7	205.95	98.646	62.156	22.221	628	16.53	1530	2658	1094	12114	1594	10258	7563	2.908	9.723	47.38	4.69	857	213	818.9	12.5	718.7	454.6	3526	3888	730	23.17
31510	1	1	32	2	1.23		1	2	2		2	1	2	2	2.3	3.6	243	2305	67.56	221.91	67.62	9.8	59.11	24.198	23.258	6.996	158	2.99	146	183	5	430	6	11799	176	1.284	1.442	30.614	2.359	398	155	383	9.19	18.3	32.1	884	1204	269	12.53
31512	1	1	51	1	0.57		1	2	2					1	1.7	3.8	299	3145	158.15	419.13	229.39	27.7	97.11	41.83	28.672	13.705	741	15.73	1048	1242	635	1989	67	14517	871	2.687	4.235	39.664	6.321	1304	785	673.7	16.16	247.2	38.5	1369	2316	514	30.52
31513	1	1	65	3	2.27		1	2	2					1	1.4	1.8	249	1648	60.6	217.87	119.7	11.5	61.55	25.38	21.598	7.996	152	4.4	470	501	55	351	19	2556	466	1.232	2.037	20.023	1.782	293	166	183.7	6.28	16.9	30.2	834	1011	200	11.39
31517	1	2	51	3	1.09	2	2	2	2					2	1.4	3.6	250	1383	49.02	185.8	125.94	6.5	52.87	17.239	21.324	9.257	154	3.91	164	199	0	438	1	17	483	0.6	0.74	13.468	1.178	204	38	209.9	2.78	15.4	64.9	231	550	149	8.44
31518	1	2	40	4	2.35	2	2	2	2		2	2	1	2	2.4	3.9	377	1611	63.52	198.7	86.94	14.5	64.81	26.624	22.906	8.253	563	5.88	419	492	13	857	71	12114	1019	1.349	1.643	13.24	1.221	324	183	380	3.9	90.6	44.4	428	865	176	11.44
31519	1	2	57	3	5	2	1	2	2					1	2.5	4.6	390	1252	65.15	117.55	27.86	6.9	56.91	19.352	22.819	9.917	154	2.44	142	275	2	1586	6	2	2364	1.39	2.421	19.693	0.692	226	100	194.3	3.53	10.7	141.5	565	918	164	12.27
31520	2	1	53	2	1.22		1	2	2					2	1.6	2	306	1827	83.79	161.02	108.27	10.3	96.33	39.862	34.14	14.489	382	7.05	430	625	686	1991	5	30245	155	1.29	1.599	21.977	1.373	136	20	296.5	11	26.9	18.4	1288	1405	305	11.94
31522	1	1	28	3	5		2	2	2		2	2	2	1	2.6	4	260	3261	102.17	566.54	389.23	13.1	67.58	20.502	24.354	16.608	196	15.09	618	660	2	489	24	10996	459	2.462	2.124	40.919	2.169	514	180	375.5	8.61	67.6	70.9	1050	1762	406	22.3
31524	2	2	52	3		2	2	2	2					2	2.3	7.2	242	2444	43.61	436.39	259.6	12.5	64.05	16.431	24.282	19.493	41	6.51	183	441	518	2826	14	9898	2194	1.846	1.315	14.942	0.614	486	305	93.3	0.64	91	151.2	585	702	154	19.2
31525	1	2	33	5	2.4	1	2	2	2		2	1	2	1	1.3	4.1	205	3202	121.15	335.8	142.63	18.5	156.96	57.08	60.787	29.087	302	8.76	423	491	25	777	13	15248	225	1.928	2.216	28.131	1.92	444	188	299.9	7.98	24.1	54.9	1777	1927	379	18.38
31527	1	1	59	4	2.35		1	1	2					1	1.3	6.1	170	1177	10.35	224.22	178.78	1.5	15.29	5.588	5.737	2.907	34	0.54	114	116	0	30	0	0	21	0.176	0.473	4.432	0.286	55	12	93.8	0.77	0.2	7.7	284	276	94	3.89
31528	1	1	20	3	1.49		1	2	2		2	1	2	2	3.2	5	302	1933	86.71	275.14	118.09	17.5	57.29	17.368	20.989	14.079	172	5.1	473	762	766	2971	265	17604	1514	3.086	3.379	35.822	3.045	598	330	314.6	6.55	220.2	72.6	1172	1423	262	22.89
31529	1	2	42	3	4.22	2	2	2	2		2	1	1	1	3.6	3.2	375	1455	87.13	101	9.6	8.8	76.25	23.931	31.183	14.041	248	3.86	89	116	51	276	4	1029	254	2.041	1.982	18.275	1.574	197	54	269.3	4.85	8.9	29.3	826	1167	289	12.21
31530	2	2	28	4	5	2	2	2	2		2	1	2	2	2.2	3.3	331	2627	74.6	330.64	163.08	11.5	112.98	25.979	54.78	26.708	224	6.42	59	65	2	69	7	2077	79	1.014	1.052	28.156	1.794	163	52	211.7	0.81	19.6	62.6	327	1173	202	9.11
31531	2	2	80	4			2	2	2					2	3	3	350	1445	48.31	173.68	29.31	8.5	62.46	18.825	18.776	20.966	71	4.77	366	371	9	57	13	0	295	2.106	2.236	22.613	1.582	357	225	219.5	4.31	6.2	28.6	675	829	171	17.06
31533	2	2	20	4	1.56	2	1	2	2		2	2	2	2	2	4.5	207	724	25.04	120.64	47.66	5	19.02	6.487	6.546	4.443	71	2.13	223	225	0	12	1	0	134	0.477	0.922	4.884	0.265	89	25	98.4	1.53	0	5.8	603	720	158	5.9
31534	1	1	23	2	0.53		2	2	2		2	2	1	1	2.7	2.8	270	2087	45.69	162.81	7.44	11.4	81.45	21.056	36.127	19.787	89	8.84	0	6	1	72	0	2196	36	0.528	0.731	25.622	2.232	190	4	218	0.54	22.1	43.5	107	870	210	4.43
31535	2	2	21	3	0.16	1	2	2	2		2	2	1	2	2	8.2	259	2370	136.85	289.66	107.32	9.3	77.87	24.336	25.924	17.406	1293	7.5	434	455	2	233	25	0	461	0.938	1.965	31.371	1.553	468	244	526.8	3.76	10.7	39.1	357	1318	216	19.74
31545	2	2	33	1	1.2	3	1	2	2		2	1	2	2	1.4	5.4	363	2009	116.56	244.09	78.41	19.9	64.73	16.595	24.572	16.454	316	5.91	110	640	1878	5403	54	15145	954	1.425	1.592	36.523	2.575	343	152	356.4	2.14	69.1	113.2	339	1388	337	15.77
31546	2	2	80	2	0.47		1	2	2					1	3.2	3.7	239	1204	41.26	143.7	48.62	5.5	51.7	18.657	17.09	11.492	74	4.71	218	233	0	178	0	8924	63	0.875	1.316	9.185	0.623	183	108	96.1	2.4	49.6	23.8	829	756	112	7.31
31547	1	1	27	1	0.2		1	2	2		2	1	2	2	2.5	4.3	231	3169	123.58	281.38	136.29	26.9	177.04	82.304	64.723	19.636	392	8.18	833	871	49	433	59	0	617	1.502	2.846	13.136	1.411	487	155	197	4.4	25.2	71	3482	2542	347	11.8
31548	2	1	69	1	1.84		1	2	2					1	3.6	6.1	229	2723	151.61	225.23	25.29	25.4	137.42	40.971	40.658	42.25	331	12.76	257	323	35	769	1	40864	766	2.035	2.396	33.136	2.455	492	206	501.9	7.14	18.7	61.9	923	1919	432	25.59
31550	2	1	23	4	1.9		2	2	2		2	2	2	1	2.1	4.9	215	1923	63.95	329.87	242.51	7.5	43.24	19.446	14.42	5.263	147	2.17	531	557	0	297	10	6684	110	2.223	2.218	20.375	1.582	490	428	205.8	5.2	17.8	9.9	1107	1387	177	17.07
31551	1	2	53	4	1.51	2	2	2	2					1	1.7	4.4	371	1380	61.07	119.72	60.71	11.7	74.92	33.16	24.215	10.745	193	5.74	277	382	97	1201	37	1544	1068	0.804	1.867	12.877	1.377	177	0	235.9	5.23	83.4	98.3	732	1033	216	7.89
31553	1	1	48	3	2		1	2	2	1	2	1	2	1	2.3	5.8	301	2651	67.09	320.23	95.79	18.5	59.64	25.09	23.474	8.292	113	3.85	136	178	42	451	13	7897	222	1.532	1.57	24.005	1.871	451	137	408.1	2.47	213.7	35.3	942	1178	352	12.4
31555	1	1	43	3	4.85		2	2	2		2	2	2	1	2.2	5.2	350	4624	126.37	567.13	249	28.7	123.34	49.664	45.01	17.008	850	12.71	645	728	50	856	322	11704	1281	2.611	4.814	38.197	2.536	785	289	799.4	7.52	172	59.3	2282	2526	501	25.7
31559	2	2	66	3	3.21		2	2	2					2	1.7	3	172	1953	80.07	287.73	52.75	25.3	59.53	15.938	22.178	16.709	212	7.43	625	854	895	2262	66	0	779	2.09	1.909	25.507	2.135	379	183	310.8	3.68	35.3	91	817	1413	359	16.95
31563	2	2	61	3	3.64		2	2	2					1	1.5	3.4	228	1052	44.38	111.56	47.04	7.3	48.83	12.529	18.336	13.291	267	3.65	101	341	694	2556	5	3288	563	0.908	1.135	10.245	1.206	186	57	256.1	1.32	46.4	71.4	360	635	134	5.48
31567	1	1	55	5	5		2	2	2					2	1.5	2.7	220	2263	80.47	292.72	156.01	16.2	88.85	32.401	35.673	15.047	214	4.76	387	437	29	578	47	11656	315	1.093	1.818	19.665	1.545	187	67	272.6	6.48	17.7	70.9	1103	1329	263	14.44
31569	2	2	62	3	5		2	2	2					1	4	5.2	257	1652	67.02	180.04	86.45	9.7	77.76	37.406	22.526	9.757	567	8.52	1193	1236	34	483	9	0	739	1.261	2.672	14.466	1.751	366	188	423.7	5.69	104.2	74.2	1856	1876	347	13.17
31570	1	1	52	4	3.76		2	2	2					2	2.3	2.8	239	2061	94.97	237.24	108.24	13	84.2	25.191	34.19	17.376	689	7.1	513	609	16	1154	40	2288	1054	1.3	2.525	13.654	0.998	349	162	523.7	7.54	67.4	74.6	1017	1436	262	14
31573	1	2	65	3	2.66		1	2	2					2	3.2	5.6	352	600	36.48	83.2	83.2	0	14.08	2.304	5.984	5.16	0	11.12	724	724	0	0	0	0	0	0.896	1.024	11.008	1.152	216	0	102.4	3.32	33.2	192	640	552	228	9.92
31577	1	2	52	4	3.57	2	2	2	2					1	1.6	5.5	280	1248	66.49	106.88	62.33	8.8	62.11	20.643	22.786	13.253	571	5.33	288	538	643	2692	11	15784	1064	0.75	1.651	22.658	1.399	215	40	412.6	2.02	69.2	81.5	313	893	162	8.08
31582	2	1	37	4	3.21		2	2	2		2	1	2	2	2.5	2.9	301	4063	95.37	582.31	358.22	22.7	156.25	72.98	50.442	21.04	279	10.59	938	1014	125	714	209	3949	988	2.461	4.019	25.44	2.086	678	405	397.3	7.96	278.8	72.7	1717	2223	353	22.79
31585	2	2	40	4	1.16	2	1	2	2		2	1	1	2	2.1	4.8	347	1428	106.56	160.35	44.84	18.4	40.26	9.126	13.528	13.596	246	19.35	74	111	63	405	5	3932	214	0.678	0.662	74.653	7.385	126	21	260.4	1.03	104.8	21.6	302	1310	292	8.79
31587	1	1	70	1	0.93		1	2	2					1	1.5	4.6	309	2635	132.96	370.96	184.07	17.7	75.13	30.412	31.029	7.713	400	5.6	100	686	1946	5788	686	22095	1943	1.578	1.617	29.941	2.253	426	120	458.6	5.78	497	35	939	1343	259	23.46
31590	1	1	49	2	0.95		1	2	2		2	1	1	2	4	5.8	262	3318	136.21	529.07	298.05	48.1	81.96	26.706	25.683	22.629	223	10.26	264	414	241	1628	136	9495	1427	2.018	2.901	42.978	4.256	631	113	415.2	5.78	310.8	114	2226	2045	676	21.47
31591	1	1	51	5	3.88		2	2	2					1	2.4	3.2	355	2253	138.7	200.28	97.11	11.2	93.35	36.128	33.426	16.398	339	3.29	383	610	20	2633	153	4564	697	1.454	2.087	33.46	2.28	306	113	331	4.59	283.2	43.5	1595	1731	286	12.03
31592	1	2	62	1	0.93		2	2	2					2	1.3	4.4	273	1484	83.09	222.91	97.9	32.3	35.62	8.901	12.993	10.053	148	9.42	82	1980	5739	19784	256	2664	10700	1.42	1.334	24.253	2.364	486	38	303	0.76	366.3	1424.2	776	1306	511	18.42
31593	2	2	58	3	5	2	1	2	2					1	2.5	2.9	265	1167	37.85	153.69	49.77	5.2	44.11	16.325	13.936	9.771	243	4.22	156	186	23	346	4	515	620	0.901	1.082	10.69	0.658	266	140	182.4	1.7	9.7	40.4	725	604	208	7.56
31599	2	1	42	5	2.9		2	2	2	2	2	1	2	2	1.3	5.7	224	2286	91.97	310.55	151.87	18.2	77.89	19.495	27.069	25.708	170	7.32	370	392	21	231	73	0	428	2.006	2.742	35.006	1.706	387	197	285.2	4.48	46.1	54.4	970	1570	267	15.1
31601	2	2	82	4	3.12		2	2	2					2	2	5.2	233	1939	88.63	194.53	74.62	18.4	88.42	33.388	31.055	14.194	442	7.63	517	741	594	2377	63	2148	781	1.417	2.091	23.675	2.552	243	32	457.8	9.45	91.5	50.1	662	1232	282	12.21
31603	1	1	79	2	0.84		1	2	2					1	2.5	7	277	826	32.38	89.45	55.7	9.3	21.63	9.743	8.128	1.157	99	3.13	77	139	37	515	410	11893	461	0.44	0.828	8.236	0.752	94	0	163.5	2.38	101.1	15.8	232	423	136	6.94
31606	2	2	78	3	1.21		1	2	2					1	2	6	226	1928	105.2	194.21	69.42	19.7	81.54	20.443	28.893	24.216	442	7.91	266	588	468	3385	469	4040	3394	1.781	1.81	29.22	1.607	411	176	367.2	4.2	198.4	139.8	1021	1301	278	15.85
31608	1	1	40	5	0.6		2	2	2		2	1	2	2	2.6	3.3	267	2729	122.13	365.08	209.19	31.4	92.68	27.206	35.613	18.72	448	8.3	74	1668	2614	17622	177	2825	19643	1.29	2.168	25.252	2.767	470	34	522.5	5.72	519	1091.6	787	1534	420	22.7
31609	1	1	44	2	1.49		1	2	2		2	1	2	1	2.7	3.8	257	2374	106.99	297.05	93.69	41.8	87.85	23.877	28.971	26.486	184	5.93	269	328	44	578	277	7855	818	2.947	2.837	19.558	2.292	476	19	404.6	3.85	203.5	49.9	1331	1977	499	13.48
31610	1	1	85	4	1.82		2	2	2					1	1.8	4.2	224	2444	111.28	187.72	60.18	18.3	128.89	47.005	47.143	23.207	482	10.97	505	1280	3152	7695	38	2100	1737	1.266	2.134	23.296	2.758	339	104	467.4	9.3	105.2	143.3	1068	1523	277	16.63
31615	1	2	47	4	1.78	2	1	2	2		2	1	2	1	1.2	5.1	361	2615	97.61	303.8	143.76	21.3	84.4	26.238	32.792	15.48	163	7.68	113	220	150	1190	49	18079	669	1.595	2.385	22.272	1.762	377	174	291.5	4.06	82.4	80.3	1137	1413	353	17.01
31619	1	2	31	4	3.21	2	2	2	2		2	1	2	2	1.7	4.2	374	1985	87	232.2	89.17	18.8	81.39	28.299	31.827	17.473	572	4.75	941	982	150	362	178	0	961	2.444	3.428	23.993	2.462	663	430	505.8	6.51	101.2	57.4	1427	1577	352	19.7
31620	2	2	53	4	1.37	2	1	2	2					2	2	3.1	219	1900	89.37	218.5	99.89	22.8	75.08	19.731	27.085	23.78	296	9.98	406	480	571	632	6	0	262	1.141	2.754	32.146	1.54	252	65	402.6	3.06	28	35.8	1366	1618	693	13.53
31625	1	1	63	1	1.74		1	2	2					1	2.8	5.5	286	2273	151.05	209.29	49.68	11.3	89.65	20.915	35.71	26.835	926	6.92	217	233	9	184	22	0	364	2.144	1.835	22.613	1.738	346	200	646	11.12	37.6	59	848	1734	308	16.47
31630	1	2	33	5	5	1	2	2	2		2	2	2	1	2	7.9	240	2503	129.32	245.1	117.27	19.3	115.48	48.575	37.827	18.486	348	8.53	618	739	51	1387	40	418	2364	1.418	2.371	32.671	2.021	320	105	350.2	5.55	118.8	201.2	2007	1916	414	13.97
31633	1	2	85	2	2.2		2	2	2					2	2.1	4.9	167	1587	60.31	209.69	122.46	13.8	58.64	19.631	22.285	12.695	184	4.97	459	553	98	1042	144	2312	1195	1.612	2.184	19.784	2.129	613	291	230.8	4.23	109.8	91.5	894	1097	240	13.22
31634	1	1	67	1			1	2	2					1	2.5	6.8	308	2758	70.28	434.6	163.85	27.3	87.64	27.474	31.141	23.043	139	8.81	223	301	40	932	8	33890	578	2.036	2.417	23.064	1.675	454	274	191.8	2.01	155.1	134.3	1081	1641	362	17.28
31635	2	2	27	1	0.84	1	1	2	2		2	1	2	2	0.6	6.2	277	3061	102.45	407.4	184.16	29	120.04	38.381	43.52	25.924	531	8.05	669	725	50	511	341	1102	878	3.041	3.937	26.198	3.174	621	312	440.4	8.5	159.4	56.9	1460	1940	423	28.09
31636	2	2	72	1	2.42		1	2	2					1	1.7	8.2	398	1057	16.38	228.06	167.89	1.9	13.56	5.65	3.947	2.446	36	1.44	204	215	8	90	89	0	242	0.939	1.424	10.114	1.347	195	153	66.7	4.36	154.6	7.4	396	408	62	11.45
31638	1	2	22	5	4.56	2	2	2	2		2	2	2	1	2.5	3.9	303	3512	81.99	490.15	240.68	23.9	94.81	27.251	35.523	25.444	124	9	228	299	72	487	597	7147	767	2.209	2.446	33.22	3.248	522	248	267.8	5.87	186.4	71.8	1344	1560	437	34.81
31639	2	2	22	2	0.75	1	1	2	2		2	1	2	2	2.7	7.4	226	1962	98.51	184.11	74.15	9.5	91.5	32.637	36.266	17.879	281	2.72	410	435	41	295	5	996	181	2.046	2.354	23.87	1.665	306	136	329	6.83	6.9	60.7	1119	1535	209	13.93
31640	1	2	44	2	0.6	1	1	2	2		2	1	1	1	2.4	6.5	354	5002	207.9	565.63	336.71	36.1	207.05	74.963	86.318	26.918	959	9.18	256	377	311	656	1253	6546	942	2.665	2.809	37.29	3.758	373	47	1019.3	13.54	113.5	46.4	944	2868	545	25.46
31649	1	1	47	5	1.82		2	2	2		2	2	2	2	3	3.7	217	4378	209.3	514.01	236.7	31.6	143.24	36.526	72.843	23.102	673	14.16	521	3110	8121	26993	48	5017	15088	2.053	4.077	61.248	3.781	917	277	700.3	7.93	262.6	2134.7	1074	2144	656	50.12
31652	1	2	23	4	5	1	2	2	2		2	1	2	1	1.4	8.3	183	1282	57.36	125.37	72.69	7.8	62.66	22.77	19.943	13.691	148	6.18	234	342	172	840	731	3432	1140	0.858	0.874	14.705	1.843	227	33	222.2	3.36	199.9	95.8	1395	740	232	8.09
31657	2	1	73	1	1.4		1	2	2					1	2.8	3.7	339	1402	60.05	185.57	78.46	7.3	47.24	19.824	15.747	6.784	571	3.95	577	599	25	249	12	7342	399	0.979	1.896	15.182	1.289	297	174	386.2	3.37	19.1	17.9	869	983	216	8.23
31658	2	2	46	4	3.57	2	2	2	2		2	1	1	2	1.7	3.3	351	2507	109.54	302.55	129.32	15.7	97.45	25.434	31.903	32.028	362	10.01	453	955	26	5978	22	0	10090	1.795	2.83	21.3	2.112	659	366	444.5	8.92	47.6	550.4	1136	1559	243	24.57
31661	1	1	48	5	2.49		1	2	2		2	1	2	2	2	2.1	242	1347	64.28	154.06	38.71	15.9	54.53	10.659	19.657	19.952	103	6.13	68	115	353	387	0	0	45	1.106	1.02	17.789	1.048	520	89	252.7	7.27	15	28	627	1540	263	11.1
31662	2	2	44	3	0.98	2	1	2	2		2	1	2	2	2.7	3.6	225	1456	59.28	212.55	80.24	12.3	41.02	10.381	13.2	13.953	230	6.41	179	215	66	401	2	6489	173	1.079	1.236	17.616	1.081	282	182	208.2	2.98	13.8	41.3	336	781	205	9.79
31663	2	1	76	3	2.27		1	2	2					1	1.1	4.6	214	1453	27.62	263.45	202.21	7	36.92	12.767	13.781	6.486	88	2.59	111	237	299	1247	250	2209	861	0.644	0.723	6.524	0.67	162	61	118.4	1.32	76.1	42.3	288	610	102	7.82
31666	1	1	39	3	0.04		2	2	2		2	1	2	2	1.2	4.3	303	3017	101.24	336.72	188.27	12.1	144.09	46.624	58.124	19.606	639	8.22	9435	9719	1190	2803	4	0	370	1.795	4.736	37.603	2.614	306	115	797.6	48.77	242.3	63	688	1206	253	51.52
31668	2	2	85	4	1.53		2	2	2					2	2.6	3.7	294	1221	51.29	204.51	101.23	17.4	23.44	7.78	7.651	5.981	53	3.53	192	1039	0	10121	103	0	377	1.027	1.75	10.227	0.869	294	76	205.1	3.28	111.3	42.4	1048	1020	281	9.29
31669	1	2	25	3	1.49	2	1	2	2		2	1	2	1	3.2	4.5	226	937	42.06	82.9	26.46	10.9	18.07	4.345	6.272	5.35	104	2.28	15	36	13	227	5	2713	636	0.45	0.401	14.2	0.983	154	23	120.1	0.34	35.9	26.2	206	508	171	5.69
31674	1	2	28	4	3.72	3	2	2	2		2	1	2	1	3	6.5	416	2354	94.12	260.84	119.24	15.2	106.66	41.344	40.442	14.785	304	5.84	360	380	6	204	16	963	147	1.376	1.936	23.163	1.432	323	153	269.7	6.87	118.8	56.8	913	1269	230	18.09
31679	1	1	36	4	1.39		1	2	2		2	1	2	2	2.8	4	270	2719	113.44	168.44	48.15	8.7	160.8	60.06	66.01	14.672	742	6.36	323	367	29	311	355	4331	931	1.722	2.367	28.756	1.829	539	98	614.7	8.52	194.1	29.8	1016	1706	364	15.75
31680	1	2	24	2	0.53	2	1	2	2		2	1	1	2	1.8	7.7	303	3466	146.92	454.1	192.49	35.7	121.53	37.818	45.357	26.877	909	9.55	828	1252	1182	4326	396	17900	1202	2.761	3.723	36.357	3.337	575	232	637.8	7.6	159.7	69.7	1845	2588	512	29.76
31681	1	1	22	3	3.66		2	2	2		2	2	1	1	1.5	3.5	291	1958	131.34	122.78	88.07	0.8	100.14	50.962	32.044	5.932	507	5.56	666	686	2	229	0	2636	25	0.838	1.222	26.331	1.696	173	10	557.3	34.31	30.7	15.2	403	1352	206	21.73
31690	1	2	38	4	5	2	2	2	2		2	1	2	2	2.6	5	224	2232	98.24	287.88	137.43	12.4	76.2	19.149	30.07	19.334	395	5.76	481	583	16	1237	6	12937	2111	2.745	3.726	31.808	1.598	443	195	458.6	5.52	31.2	67.2	1116	1255	301	25.69
31691	2	1	52	5	3.62		2	2	2					2	1.9	2.3	228	7271	248.22	966.64	490.5	73.8	278.52	116.569	96.819	39.772	1279	16.31	1853	2245	113	4647	34	0	8253	4.169	7.956	53.353	5.328	1112	321	1178.4	10.79	435.5	760	3875	5390	1530	41.39
31699	1	1	31	4	2.65		2	2	2		2	1	2	2	1.6	2.8	222	3090	89.25	537.99	326.84	14.3	73.06	21.683	27.274	16.622	269	3.59	339	396	21	641	118	0	1194	1.671	2.119	33.228	1.9	357	188	287.7	1.57	147.3	96.5	622	1444	250	16.9
31700		2	36	3	0.85	2	1	2	2		2	1	2	2	2.5	4.9	467	2404	70.76	337.31	113.54	27.5	91.75	29.262	29.001	25.296	304	11.18	342	391	25	384	385	4396	723	1.563	1.587	20.884	2.077	455	158	291.4	1.35	183	52.9	662	1507	402	17.84
31702	1	1	22	4	1.46		2	2	2		2	1	2	2	2.9	2.6	240	2805	138.08	298.27	95.07	14.9	115.95	30.846	42.961	31.424	785	10.76	498	614	64	1353	16	0	2185	2.087	2.162	32.817	2.4	552	334	603	8.56	102.9	124.2	616	1521	322	21.81
31703	1	1	44	5	2		1	2	2		2	1	2	1	1.7	3.5	188	1750	67.74	270.08	117.91	21.5	46.33	14.128	14.668	11.869	748	9.63	443	543	124	834	651	12448	1301	1.714	2.52	20.607	1.859	491	184	534.4	3.58	203.1	48.1	973	1238	314	13.85
31706	1	2	45	5	5	2	1	2	2		2	1	2	2	1	1.7	276	960	26.61	99.11	28.47	5.4	32.35	8.867	10.01	10.821	153	2.37	100	143	142	452	2	0	263	0.649	0.842	7.784	0.68	177	91	139.2	0.88	36.6	47.2	335	526	117	7.19
31707	1	2	75	3	2.92		1	2	2					2	1.9	5	365	2044	62.88	226.49	83.15	12.6	81.89	31.109	31.398	11.459	149	3.2	493	542	71	427	240	2685	446	2.011	2.527	24.013	1.967	736	597	188	6.62	77	29.5	682	1057	261	19.46
31708	2	2	29	2	0.73	1	1	2	2		2	1	2	2	2.6	7.5	386	2145	88.97	295.16	68.07	19.3	67.62	23.774	27.348	11.292	197	3.22	146	367	827	2222	20	7347	808	3.151	1.98	25.664	1.403	507	381	247.4	2.47	30.9	66.5	878	1154	204	17.6
31709	1	1	39	3	3.62		2	2	2		2	1	2	1	1.5	4.1	203	3278	132.99	343.73	236.42	4.7	95.9	43.936	30.52	13.835	333	3.27	813	889	82	589	569	1544	643	2.02	3.575	31.184	2.959	371	76	590.7	9.4	144	24.1	2241	2460	429	11.24
31710	1	1	42	4	2.83		2	2	2		2	2	2	1	2.1	5	267	3347	87.51	518.42	312.05	29	112.58	31.942	42.588	28.112	220	15.46	523	1036	2	6099	108	16649	6384	2.058	2.269	29.003	1.528	645	266	301.8	2.18	59.1	424.7	1506	1642	476	20.17
31711	2	2	23	3	1.09	2	2	2	2		2	2	2	2	1.9	2.4	378	3669	106.25	487.2	272.9	19.6	151.72	52.81	60.744	25.311	432	7.65	1072	1149	43	602	559	5525	686	2.204	2.856	34.648	2.679	530	318	333.3	6.39	151.7	52.2	1161	1745	398	31.68
31712		2	31	2	1.49	2	2	2	2		2	1	1	2	1.7	3	397	1328	50.43	186.25	118.28	4	44.76	18.712	16.932	5.689	231	0.98	989	1022	33	96	12	0	766	2.439	3.614	29.658	3.128	446	356	259.8	11.58	53.3	8.2	1036	1044	125	24.12
31714	1	1	21	2	1.19		1	2	2		2	1	2	1	2.4	3.6	356	2180	153.19	338.88	227.03	15	29.22	7.27	11.285	6.568	489	11.12	156	635	92	5394	592	11499	418	0.826	0.464	8.025	3.3	281	18	515.5	15.97	367.6	38.5	754	1810	442	10.08
31717		2	45	1	0.46	2	2	2	2		2	2	2	2	2.3	5.5	397	1468	50.22	200.14	125.41	5.4	39.52	15.714	14.919	4.772	139	1.95	499	523	10	128	326	418	309	1.314	2.013	21.284	1.83	339	219	203.3	5.37	78.9	10	540	749	146	9.21
31720	2	2	73	3	0.1		1	2	2					2	1.5	3	269	1947	89.31	254.43	136.07	9.1	64.89	11.441	19.617	28.821	323	7.14	160	521	66	4284	39	0	669	1.395	1.239	27.139	1.361	291	138	327.2	5.51	82.1	72.4	620	1114	182	11.34
31721	2	1	62	4	3.37		2	2	2					2	1.6	1.9	278	1870	39.59	272.56	177.14	8.5	71.63	18.54	26.549	20.597	91	4.93	54	70	25	181	1	626	209	0.7	0.569	17.411	1.107	172	69	131.2	0.66	7.5	37.7	318	585	135	6.87
31724	1	2	37	5	5	2	2	2	2		2	2	2	2	1.5	5.2	336	2003	85.02	200.41	49.77	11.7	82.35	22.253	29.407	24.362	248	7.84	141	369	17	2699	4	734	2952	1.684	1.904	25.31	1.437	550	249	338.7	9.12	72.3	294.2	711	1113	263	16.87
31725	1	2	48	3	0.93	2	1	2	2		2	2	1	2	3.9	6.1	331	2823	113.42	304.45	96.38	28.6	135.02	61.413	41.83	22.885	294	4.21	632	707	82	877	2	1029	604	3.541	3.155	29.134	1.983	574	323	300.7	3.54	45.3	79.3	1737	2430	699	26.86
31729	2	1	80	3	3.63		1	2	2					1	2	6.5	207	2616	92.2	377.55	119.6	37.1	88.83	27.677	33.149	19.502	149	8.68	616	715	112	961	315	18600	1134	4.384	4.598	40.712	3.642	854	586	364.1	8.54	159.6	52.8	803	1277	400	37.94
31732	1	1	53	3	5		1	2	2					1	2.2	1.6	164	1375	56.68	223.37	69.8	8.9	28.66	6.546	10.638	8.51	148	1.78	41	41	0	3	0	0	102	1.158	1.002	19.332	0.829	311	210	101.4	0.45	7.9	17.3	240	714	142	10.15
31733	1	1	79	5	2.65		2	2	2					1	1.2	6.8	218	1261	38.31	182.87	79.15	14	45.15	14.793	16.359	10.527	75	6.48	301	382	22	876	202	3610	479	0.918	1.163	13.747	1.015	169	79	143.8	1.09	51	72.1	423	692	149	8.62
31734	1	1	64	4	5		2	2	2					1	1.8	4.6	263	1852	57.58	262.31	142.92	16.4	67.24	21.932	23.88	16.15	445	5.55	555	665	325	993	322	0	759	1.55	2.055	15.782	1.374	418	229	355.9	2.66	104.7	87.6	1121	1059	233	16.97
31736	1	1	79	1	2.24		1	2	2					1	1.8	6.3	317	2691	133.13	217.09	130.69	8.5	143.3	59.007	53.012	15.711	811	8.27	654	751	25	852	613	12530	1177	1.772	3.347	27.18	2.261	342	108	656.4	12.02	168.1	54.5	1677	1774	285	17.72
31739	1	1	27	4	1.5		2	2	2		2	1	2	1	3.6	3.7	331	1171	51.5	164.4	45.78	8.3	35.38	12.68	13.848	6.401	100	2.87	1323	1325	0	29	0	0	23	2.905	3.432	33.485	3.021	583	524	159.2	9.26	0.6	4.2	676	1097	199	46.43
31740	2	2	28	5	5	1	2	2	2		2	2	2	2	2.9	8.3	273	1955	81.24	327.3	106.39	29.6	39.77	17.605	12.505	6.616	231	7.47	1071	1892	2892	8355	156	19316	3967	2.403	3.603	25.195	2.529	618	332	369.8	7.77	102	128.8	1599	1922	426	27.64
31741	1	1	75	4	1.71		1	2	2					1	2.2	4.9	347	1778	64.49	257.62	118.68	8.2	54.35	17.872	22.66	8.313	157	3.22	10	57	0	564	0	0	950	1.149	1.03	13.97	0.861	290	210	211.6	4.35	13	40.5	234	683	151	13.87
31742	1	2	25	4	1.82	1	2	2	2		2	2	1	1	1.4	4.9	195	2563	94.31	360.49	117.23	27.2	88.69	28.857	31.071	22.285	221	11.14	885	957	101	801	20	13777	710	3.48	4.282	37.978	3.299	687	456	316.5	7.31	66.5	66.2	1702	1832	391	28.03
31744	1	2	65	2	3.41		2	2	2					2	1.7	5.3	355	1616	92.76	189.79	46.41	19.4	55.67	19.492	21.267	10.57	186	4.27	436	497	72	646	85	14219	1082	1.391	1.787	34.182	2.061	262	113	222.8	2.19	67.2	36.2	1053	1575	305	13.39
31746	2	2	77	1	1		1	2	2					2	1.9	4.5	260	1248	62.59	146.24	90.13	16.2	48.32	21.021	16.859	5.145	179	5.12	494	602	34	1183	207	16094	300	0.574	1.802	11.969	0.959	128	32	283	5.38	24.9	34.3	940	1030	199	9.49
31747	1	1	37	5	5		2	2	2		2	2	2	2	2.4	4.3	308	2768	107.42	328.89	177.09	13.2	106.54	40.512	37.653	19.83	336	6.61	580	639	73	677	16	7102	374	1.494	2.519	28.776	1.803	354	163	363.4	3.29	28.5	81.3	1213	1604	316	14.6
31748	1	1	50	4	0.5		2	2	2					2	1.3	3.6	331	3166	116.24	363.15	174.21	20.1	131.41	50.015	44.891	21.302	373	9.4	358	453	52	1028	184	8828	669	1.65	3.857	34.871	2.704	412	135	485.5	7.87	60.3	89	1156	1607	407	18.98
31751	1	2	25	3	0.72	2	2	2	2		2	2	1	1	2.4	10.4	250	1457	33.34	163.69	58.16	5.7	76.61	20.875	27.27	21.06	91	7.72	65	67	7	27	7	7	30	0.815	0.949	12.53	0.856	229	106	91.1	0.83	16	27.4	228	886	133	6.75
31752	1	1	51	2	3.03		1	2	2					1	1.8	3.6	274	2645	112.96	247.31	81.41	14	71.15	20.037	28.868	15.092	702	5.34	188	216	25	274	76	2917	905	1.921	2.418	30.757	2.842	339	36	785.6	4.05	44.4	35.5	451	1674	382	10.4
31755	1	1	47	1	1.18		1	2	2		2	1	2	1	1.3	2.9	190	1705	70.92	233.03	82.34	9.9	33.2	5.408	8.51	15.984	97	4.76	74	196	170	1252	262	119	432	0.827	0.389	10.861	2.018	297	173	272.6	7.76	146.4	19.2	252	930	226	6.75
31762	2	2	70	1	0.62		1	2	2					2	2.2	3.5	384	404	28.04	55.06	19.44	5.3	8.13	2.826	2.144	1.964	80	0.64	38	207	694	1686	0	0	88	0.248	0.46	9.328	0.494	36	11	73.6	0.56	1.7	7.8	201	485	96	2.12
31764	2	2	51	3	2.51	2	1	2	2					1	2.4	4.8	261	1238	52.92	152.35	60.24	15.9	47.79	13.38	18.2	9.795	141	3.53	20	104	51	931	161	9922	258	0.847	1.081	14.247	1.089	181	13	201.9	1.72	43.6	44.7	287	700	227	8.73
31765	1	1	70	4	5		2	2	2					1	1.8	4.1	247	2636	43.09	404.58	229.12	14.3	98.8	29.512	39.51	20.799	175	4.99	348	375	13	237	194	2514	343	1.687	2.811	20.023	1.228	389	147	229.1	1.2	102.2	34.5	462	1278	244	11.4
31767	1	2	45	3	5	2	2	2	2		2	2	2	1	2.3	3.4	383	1126	75.77	130.25	60.48	7.8	33.22	14.74	11.463	3.214	147	2.62	137	171	1	365	117	0	326	1.117	1.591	14.455	1.084	259	122	193	4.78	28.3	28.6	333	783	133	12.38
31771	1	1	32	2	1.16		1	2	2		2	1	2	1	2	5.5	225	2376	104.35	248.09	103.13	11.9	108.46	36.11	41.648	23.144	342	6.23	197	229	20	365	7	3970	307	1.63	4.319	69.639	6.125	278	151	278.4	14.5	40.3	77.5	621	1208	224	17.02
31778	1	1	41	4			2	2	2		2	1	1	1	4.1	6.1	289	2529	176.54	164.79	16.97	9.6	126.5	33.524	45.695	36.679	504	4.51	358	391	28	290	48	0	267	1.425	1.542	65.117	4.052	216	130	389.5	2.29	41.1	75.6	638	1538	310	11.69
31779	2	1	55	1	0.12		1	2	2					1	2	5.3	341	2506	75.21	346.93	65.14	55.6	94.67	20.779	32.782	35.724	27	9.18	18	36	19	198	8	0	866	2.043	1.312	14	1.476	776	125	238.4	0.29	38.1	106.1	661	1683	538	19.02
31781	1	2	58	4	1.45	2	1	2	2					1	3.4	5.8	416	1979	105.91	167.85	74.97	10	82.44	29.696	30.062	13.959	780	4.45	320	682	1557	3550	61	1940	1575	1.213	2.134	31.542	1.673	221	72	601.6	4.24	7.2	77	299	1435	223	10.63
31785	1	2	83	4	5		1	2	2					1	0.9	6	240	2004	98.04	268.33	141.22	20.4	64.25	23.034	27.262	8.624	204	8.16	643	747	75	864	646	16094	820	1.355	2.963	17.293	1.738	292	93	420.5	8.91	151.3	49.1	1823	1957	398	17.85
31787	1	1	58	4	1.04		2	2	2					1	3.1	3.2	169	5167	78.91	903.62	554.12	35.7	149.32	46.25	48.895	39.026	181	13.45	464	1123	16	7891	8	2508	14207	2.564	3.87	29.585	2.95	753	191	382	2.2	98.9	657.2	1067	2093	521	19.79
31789	1	1	53	3	5		1	2	2					1	2.1	6.2	289	2715	156.18	278.47	188.25	19.3	109.46	48.89	37.177	11.238	449	3.9	406	475	6	856	22	0	1043	1.543	3.61	21.821	3.071	200	23	586.6	14.41	49.8	58	1711	2181	376	15.63
31793	1	2	27	1	0.93	2	1	2	2		2	1	2	2	1.7	2.6	209	414	23.76	36.96	9.33	2.2	19.08	6.776	6.759	3.874	81	0.88	80	82	0	24	0	0	14	0.256	0.393	6.162	0.546	38	8	65.2	0.89	8.3	10.3	175	250	66	2.13
31795	2	2	60	1	1.55		1	2	2					2	1.9	2.8	182	1214	46.17	221.42	105.73	24.7	18.95	7.422	5.879	3.25	89	3.18	75	802	2957	7245	0	0	1517	0.908	0.729	8.876	1.848	346	7	206.8	2.07	147.6	131.4	329	838	263	10.13
31796	1	1	60	2	3.63		1	2	2					1	1.5	1.9	203	2080	72.96	229.81	47.53	16.5	89.59	24.623	34.342	23.725	345	5.6	104	136	37	299	98	0	528	1.832	2.299	25.404	1.984	345	125	380.2	2.81	29.9	51.1	657	1114	266	15.43
31799	1	2	47	5	5	2	2	2	2		2	2	2	2	3.3	4.5	269	1738	87.31	158.22	51.22	6.3	71.45	26.901	20.139	17.445	349	4.23	394	445	90	546	46	1582	497	1.284	2.387	21.136	1.14	262	157	299.8	6.05	12.3	54	1317	1415	287	11.45
31800	1	2	60	3	5		2	2	2					2	1.9	2.5	327	1279	49.53	198.94	78.36	13.4	33.12	11.04	13.993	6.071	82	2.39	704	717	23	141	0	579	55	1.885	2.057	18.715	1.806	491	317	167.7	5.09	8.1	13.9	613	807	211	25.18
31802	1	2	60	3	4.07		2	2	2					1	1.7	4.3	270	1341	56.32	140.85	43.24	7.3	62.33	24.096	22.046	10.641	345	4.7	408	433	2	312	5	10410	269	1.257	1.59	12.08	0.744	309	200	262	3.22	45.5	27.1	796	879	153	9.59
31804	2	2	52	4	5	2	1	2	2					2	3.3	4.9	286	1410	76.84	163.64	33.19	19.4	50.79	16.8	19.619	9.15	385	5.12	306	384	74	903	4	0	2699	1.252	1.763	15.021	1.265	310	129	341.4	4.47	35.8	72.2	763	1144	242	13.4
31807	1	2	57	5	5	2	1	2	2					2	2.3	4.7	362	2009	84.5	229.75	97.27	8.5	83.11	30.937	31.51	13.087	240	4.25	251	293	20	522	2	8064	169	1.591	3.183	23.012	1.313	286	152	277.2	5.3	22.5	40.9	993	1328	225	13.2
31808	2	1	79	5			2	2	2					2	1.1	5.6	196	830	28.62	88.34	49.95	4.8	42.17	17.997	15.46	6.003	303	3.31	314	349	2	369	105	0	274	0.563	0.846	6.759	0.307	81	41	193.4	2.38	5.6	19.7	327	428	79	4.82
31813	1	2	47	4	0.39	2	1	2	2		2	1	2	1	2.1	5.2	224	1801	46.6	247	127.06	13.5	74.18	28.731	27.2	13.839	380	7.57	271	320	24	575	16	12274	853	0.981	1.581	9.412	0.81	294	134	265.4	1.16	113	57.9	833	893	165	11.56
31814	1	1	58	4	0.87		2	2	2					1	1.8	4	256	3382	124.75	375.01	157.11	14.7	152.47	45.956	64.912	27.784	368	7.34	190	207	30	188	35	0	537	2.069	2.685	33.525	1.492	437	263	436.9	8.15	10.3	71.5	810	1571	273	27.15
31816	1	2	26	4	2.4	1	1	2	2		2	1	2	2	2.5	6.2	211	1190	58.65	129.11	65.77	8.8	50.22	18.973	17.843	7.854	343	3.26	341	360	11	181	113	627	405	0.725	1.645	11.727	0.986	169	63	276.9	5.15	51.1	21.8	890	977	183	8.01
31820	2	1	58	2	2.36		1	2	2					2	1.5	5.9	340	2296	132.34	315.91	66.12	60.2	56.04	12.632	20.963	17.822	169	5.48	117	313	760	1985	0	1916	311	2.055	1.361	28.666	2.764	518	166	401.2	1.21	33.1	58.4	509	1566	380	22.05
31821	2	2	25	4	2.8	1	2	2	2		2	2	2	2	2.2	9.7	374	1754	53.16	269.52	155.13	9.4	54.36	17.116	19.265	11.515	502	4.18	867	897	11	341	43	0	637	1.768	2.697	22.764	2.264	434	308	358.7	6.07	210.2	19.6	899	924	282	28.54
31822	2	2	28	4	5	1	2	2	2		2	2	2	2	1.7	6.7	156	3279	101.16	509.22	322.63	24.1	102.6	38.048	30.98	26.086	130	13.54	668	715	25	561	15	7810	656	1.998	3.282	17.175	2.334	613	395	339.9	9.37	95.2	31.9	1989	2017	494	18.96
31824	1	2	22	4	0.78	1	2	2	2		2	2	2	1	1.6	10.9	296	3280	133.33	379.93	130.33	21.2	138.27	52.648	51.053	21.282	738	13.42	1261	1353	49	1082	10	18901	688	2.587	4.732	29.702	1.837	660	366	628.8	8.68	15.7	132.4	2356	2463	491	20.87
31827	1	2	46	2	1.46	2	1	2	2	1	2	1	1	1	2.7	2.9	349	1463	67.9	130.99	38.83	7.8	74.66	19.924	27.089	19.503	574	6.34	344	449	260	1110	72	612	775	1.266	1.751	22.183	1.014	245	100	379.3	3.46	18.3	88.6	517	992	180	9.82
31830	2	2	62	3	0.94		2	2	2					2	1.9	2.8	318	2666	106.65	372.21	189.31	16	86.47	30.278	30.418	17.823	797	7.9	1080	1248	805	1543	217	0	1088	1.751	2.754	24.636	1.922	548	277	608.9	4.16	101.2	43	955	1407	251	15.65
31831	1	1	46	3	4.26		2	2	2		2	2	2	2	1.4	3.7	236	3001	126.61	302.64	145.65	12	144.53	45.387	51.312	36.897	500	10.81	447	1276	2840	8530	22	836	606	1.681	2.373	27.662	1.911	363	205	457.4	8.14	62.1	105.4	869	1664	318	16.29
31833	2	1	41	1	1.33		1	2	2		2	1	2	2	1.9	2.9	328	1041	28.62	173.63	75.14	11.6	28.63	6.845	10.497	8.224	509	2.57	189	190	0	17	12	0	410	0.467	0.842	4.457	0.806	88	14	302	1.51	8.6	13.7	290	865	154	6.29
31837	2	2	24	2	0.9	1	1	2	2		2	2	1	2	2.5	8.4	405	1077	51.25	147.61	77.41	7.7	32.47	10.411	14.485	5.83	119	2.32	74	88	12	167	6	1504	84	0.795	0.818	18.461	1.453	118	39	178.9	1.03	81.2	18.2	269	587	157	5.8
31839	1	2	23	3		1	1	2	2		2	1	2	2	2.2	9.6	239	1849	60.1	262.77	157.16	24	67.29	21.71	22.114	16.07	699	6.14	769	835	170	380	729	1	899	1.622	2.785	15.131	2.122	583	339	482	8.83	60.2	35.6	1161	1415	309	21.81
31843	1	2	54	4	5	2	2	2	2					1	4.8	5	302	1998	76.91	168.88	102.91	12.4	82.44	35.984	26.539	12.697	337	2.97	409	431	0	230	48	0	177	0.62	1.21	6.805	0.854	136	41	260.6	6.21	19.9	34.1	1199	1353	223	6.11
31847	1	2	35	4	3.26	2	2	2	2		2	1	1	1	1.4	1.6	178	1415	37.23	201.92	57.05	8.7	50.73	18.231	16.169	11.635	108	4.94	187	201	14	161	6	828	321	1.707	2.629	21.488	1.234	390	220	156.8	2.29	25.4	57.2	557	618	149	13.87
31852	2	2	20	3	0.8	2	2	2	2		2	1	2	2	2	3.2	219	2379	129.1	246.36	103.84	14.1	97.37	33.755	38.616	12.951	633	9.13	423	616	36	1820	967	4629	760	2.024	2.493	26.386	2.76	416	154	604.9	7.57	242.5	47.9	1522	1881	308	18.05
31857	1	2	74	4	5		2	2	2					1	2.2	3.9	216	1707	136.06	132.42	50.2	8.7	68.85	31.523	21.472	9.322	832	3.39	899	927	11	335	12	264	758	1.107	2.788	36.407	2.16	271	114	613.5	5.71	10.4	20.9	1281	1792	261	11.33
31858	1	1	37	3	1.82		2	2	2		2	2	1	2	2.3	3.5	340	2514	94.4	277.98	95.83	14	114.8	36.497	45.206	22.963	633	8.04	307	324	6	200	19	2959	510	1.6	2.154	29.483	1.718	378	163	453.1	3.86	24.9	45	685	1284	249	16.02
31859	1	2	46	4	5	2	2	2	2		2	1	2	2	2.5	9.5	336	3034	108.92	333.87	166.9	11	140.48	34.351	53.438	41.194	375	6.26	76	80	1	24	8	620	219	1.531	1.806	29.337	1.449	269	167	381	3.6	35.8	106	409	1512	220	16.74
31863	1	2	29	4	5	2	1	2	2		2	2	1	2	2.4	5.2	211	1686	53.14	171.92	60.81	6.8	59.37	17.547	20.939	16.587	165	2.98	103	114	12	112	7	2251	184	1.495	0.909	14.071	0.846	216	128	173.5	1.71	7.6	39.1	488	716	141	9.2
31868	1	1	22	4	3.64		1	2	2		2	2	2	1	4.5	5.2	389	1567	54.21	198.01	99.6	11.4	63.8	21.858	22.799	13.502	278	2.86	700	709	34	92	5	0	323	1.823	2.531	20.216	2.194	625	509	289.3	6.84	26.8	17.6	1288	1199	254	15.74
31870	2	2	21	4	2.27	2	1	2	2		2	1	2	2	2.4	1.8	319	1340	23.69	218.28	116.06	5.8	43.11	11.366	14.239	14.927	103	4.13	141	232	6	1099	21	35	1440	0.802	0.788	7.817	0.461	190	107	87.7	0.65	70.9	105.5	347	425	91	7.36
31871	2	2	23	2		2	1	2	2		2	1	2	2	2.4	4.5	399	2778	106.21	458.34	272.51	16.5	59.24	20.343	19.766	12.731	329	3.44	296	340	57	415	47	1446	302	1.849	2.951	28.683	1.709	382	196	400.2	4.98	216	26.1	1103	1594	310	15.25
31873	2	1	32	3	3.27		2	2	2		2	1	2	2	2.1	2.3	352	2250	91.84	237.81	67.25	10.4	103.17	32.662	38.508	23.072	196	6.26	160	191	25	350	14	15623	191	1.709	1.984	25.553	1.322	344	210	173.8	2.05	22.5	46.9	851	1046	180	14.56
31874	1	2	29	2	3.54	2	2	2	2		2	1	2	2	3	2.8	183	2332	92.26	245.66	125.2	14.6	111.44	41.397	37.782	25.567	242	9.6	213	352	72	1604	41	699	1274	1.213	1.202	34.774	1.824	327	151	266	1.66	52.2	175.6	640	1150	290	14.03
31877	1	1	62	4	2.72		1	2	2					1	1.4	4.2	239	1964	80.44	216.92	148.74	5.2	86.07	32.499	33.104	11.815	434	2.93	285	297	13	158	11	1720	261	1.25	2.234	16.217	1.2	184	68	374.7	5.95	3.5	23.9	1041	1308	181	9.34
31878	1	1	55	4	5		2	2	2					1	1.9	3.8	263	1322	63.29	118.38	28.32	12.4	68.35	14.499	21.911	23.817	387	8.46	184	1186	217	11837	142	0	18788	0.723	1.163	12.502	0.827	236	48	318.1	2.47	50.6	1091.7	739	855	230	11.35
31893	1	2	81	4	3.12		2	2	2					2	1.3	2.9	309	1505	66.99	218.47	79.88	32.1	30.4	7.45	9.853	10.133	115	8.66	562	741	621	1720	224	396	455	2.713	2.933	41.84	3.88	685	436	323.2	10.85	239.4	103.5	568	1187	335	28.23
31894	1	2	61	4	1.15		1	2	2					2	1.7	2.6	240	2369	85.75	378.74	190.49	40.4	64.97	20.501	24.33	13.925	162	11.23	294	436	230	1046	1118	18032	1622	1.401	2.291	16.183	4.079	498	9	394.5	5.73	325.4	42.7	1922	1577	544	17.17
31895	1	1	74	5	5		2	2	2					1	0.8	3.4	245	2652	89.88	284.94	165.29	21.9	100.73	29.44	38.196	24.989	350	13.57	496	1256	1888	8011	332	1031	4884	1.826	2.669	29.729	2.233	526	81	415.9	3.35	125	278.4	1128	1666	465	13.5
31897	1	1	79	4	2.27		1	2	2					2	1.8	5.7	327	2064	83.99	218.79	34.62	18.3	95.87	33.449	34.837	19.227	294	8.19	300	649	12	4180	8	17897	7408	1.893	2.24	16.931	1.035	388	175	238.4	3.45	72.5	337.8	1412	1760	268	16.72
31898	1	1	73	5	3.12		1	2	2					1	1.4	5.9	384	1712	63.93	184.92	53.69	32.5	91.93	24.818	38.774	22.387	92	12.94	518	829	1235	3094	27	7258	621	1.963	1.879	37.018	3.163	586	215	207	4.53	50.6	44.1	510	1144	513	22.03
31899	2	1	40	1	0.41		1	2	2					2	2.5	1.4	254	1667	38.65	278.2	47.44	26.7	48.14	10.031	14.944	18.283	0	15.24	27	406	459	4269	104	2697	1333	1.649	1.314	16.479	1.262	546	225	130.6	0.39	161.5	98.8	390	638	270	13.46
31903	2	2	73	5	5		2	2	2					2	1.4	3.7	210	1635	49.13	193.16	82.9	20.2	82.07	19.672	38.885	18.584	61	6.98	137	194	124	512	193	2058	1124	1.454	1.153	20.057	0.929	290	41	188.1	1.81	30.5	34.6	581	940	321	8.71
31913	1	2	48	4	5	2	2	2	2		2	2	2	1	3.2	5.2	266	1413	51.69	169.57	117.85	8.1	61.82	26.122	16.869	13.785	110	14.55	999	1287	1056	2908	19	0	501	1.255	1.89	14.302	1.656	324	32	179.7	4.3	66.5	256.8	1245	1195	328	13.82
31914	1	1	51	3	2.41		2	2	2	1				1	1.4	2.6	321	2317	112.58	232.36	116.11	8.1	85.95	33.819	33.264	9.268	306	4.67	111	145	18	374	67	5013	176	1.404	1.525	29.913	2.167	320	117	395.5	7.98	36	35.5	640	1404	210	15.87
31921	1	2	20	3	4.71	1	2	2	2		2	2	2	1	1.8	9.8	251	1584	114.79	173.49	111.77	5.1	49.33	21.616	18.419	4.101	236	2.31	531	553	23	209	161	2506	924	0.896	2.203	24.138	1.803	207	73	453	8.24	8.7	20.4	1287	1587	234	9.91
31922	2	1	31	5	2.35		2	2	2		2	1	2	2	2.7	5.1	305	3623	211.31	197.63	68.37	25.4	221.22	92.494	87.845	18.778	762	8.33	367	508	40	1640	47	14838	1344	2.843	3.084	38.738	2.891	337	111	756.9	8.83	92.8	164.2	1473	2499	418	22.85
31923	1	1	65	3	5		1	2	2					1	2.3	2.1	266	1984	98.04	326.59	253.85	14.4	34.33	12.659	11.066	6.557	279	3.83	253	410	197	1490	684	1509	2305	1.652	1.993	19.304	2.867	344	89	373.3	3.42	508.2	59.3	866	1182	381	12.91
31924	2	2	20	2	2.87	1	2	2	2		2	1	2	1	2.2	7.3	179	1792	50	200.52	39.99	10	87.16	27.815	34.841	19.495	99	4.03	71	82	1	125	3	5192	144	1.277	1.139	17.062	0.932	273	157	125.1	1.11	8.8	43.5	449	668	149	10.56
31926	1	2	51	3	2	2	2	2	2					2	2.8	4.3	253	3131	99.13	355.13	163.84	14.7	149.33	50.028	51.387	38.31	275	11.01	709	950	105	2571	509	8841	2683	2.577	4.321	25.452	1.997	980	587	290	4.79	139.5	221.2	1885	2173	414	28.69
31929	2	2	20	4	1.42	1	1	2	2		2	2	2	2	1.9	3.1	560	1514	38.45	241.83	79	16.7	45	14.179	17.745	9.897	73	4.01	40	48	48	75	3	0	1129	2.001	2.131	23.635	2.024	1490	1299	140.4	0.39	2.6	24	509	646	224	28.34
31936	1	2	22	3	1.05	1	2	2	2		2	1	2	1	1.7	8.1	286	2684	55.96	396.25	227.37	13.8	100.89	42.719	44.002	10.434	222	3.46	650	669	29	210	7	72	136	1.201	1.819	19.085	1.45	164	79	205.1	4.6	7.5	47	855	1196	247	12.09
31937	2	1	57	4	5		2	2	2					1	1.9	4.9	319	2585	74.32	292.4	142.29	7.8	124.77	41.81	55.002	18.235	182	8.19	125	130	0	61	0	0	82	1.496	1.962	19.496	1.009	343	216	242.8	4.98	14.9	45	623	1408	133	16.57
31939	1	1	41	4	3.57		2	2	2		2	1	2	1	3.6	2.2	184	1923	85.26	171.81	80.3	5	99.4	25.448	37.528	27.034	232	5.97	122	158	46	404	16	3311	241	1.198	1.513	20.561	1.343	242	146	265.7	4.72	12.1	53.5	435	842	143	11.45
31943	1	2	65	5	4.08									2	3.4	5.4	263	1738	58.33	234.66	124.71	16.1	65.28	30.618	21.959	11.425	150	4.48	413	518	283	993	247	1031	555	1.103	1.435	10.386	1.03	261	101	216.5	3.28	127.2	74.8	947	1146	290	9.87
31944	1	2	66	4	2.61		1	2	2					1	2	8.6	288	1982	56.05	297.94	166.18	13.6	72.95	29.187	22.277	17.307	244	8.76	673	704	36	327	28	7561	254	1.151	2.107	19.347	2.41	580	400	257.7	7.68	61.7	76.6	792	1055	317	16.75
31945	1	1	67	1	1.41		2	2	2					1	2.2	5.1	221	2543	125.44	179.45	66.12	20.3	150.07	40.338	50.431	43.602	1013	17.08	1913	3068	213	13702	74	4830	9690	1.911	5.855	36.126	2.328	380	47	882.4	3.63	148.7	1462.1	794	1667	501	20.52
31946	2	2	65	3	2.49		1	2	2					2	1.4	4	200	694	44.91	72.74	26.73	7.5	26.35	8.075	9.999	6.13	187	1.87	96	150	165	563	30	1445	205	0.477	0.741	9.08	0.685	122	47	168	1.36	19.1	51.2	464	524	121	4.37
31947	1	2	61	2	1.02		1	2	2					2	1.7	3.1	210	1195	34.72	173.04	111.41	8.1	43.69	21.185	12.269	6.422	86	2.19	266	291	15	305	0	0	3493	0.725	1.332	6.386	0.923	173	75	113	2.84	18.2	21.4	944	900	179	5.74
31953	1	2	33	5	5	2	2	2	2		2	2	2	2	2.8	5.6	307	1151	39.76	137.85	66.37	6.9	37.41	13.237	13.934	6.916	168	1.55	151	201	151	328	358	0	360	0.76	1.011	9.845	0.645	158	88	152.3	1.59	31.4	60.1	575	853	128	6.7
31958	1	2	49	4	2.65	2	2	2	2	1	2	2	1	1	1.7	1.2	173	2374	113.6	258.31	128.68	9.2	75.03	24.675	31.153	11.644	481	6.11	207	267	45	545	302	10653	481	3.093	2.333	37.273	2.498	312	130	508.3	3.28	72.7	29.6	691	1458	267	11.95
31960	1	1	56	1	0.93		1	2	2					1	2.8	5.8	286	1581	51.93	229.74	57.76	22.1	52.53	17.514	21.391	9.878	132	2.8	186	217	84	319	8	1160	192	1.499	1.427	14.721	1.221	384	180	143.2	1.05	29.3	45.5	826	932	289	12.82
31961	1	1	29	3	0.21		2	2	2		2	1	2	2	2.8	6.1	258	5612	172.04	792.83	401.21	37.4	202.76	59.132	69.236	54.85	482	17.56	698	814	54	1305	171	7651	1281	4.621	4.397	45.581	2.787	697	383	617.5	5.78	65.9	160.4	1796	2867	622	32.08
31962	1	2	54	3	2.19	2	1	2	2					1	2.3	3.3	325	1213	54.83	130.37	75.8	5.7	53.73	18.419	19.077	10.879	616	3.77	389	409	5	235	13	0	764	0.783	1.725	14.207	0.883	178	48	377.7	2.2	25.6	53.3	422	739	137	7.48
31964	2	1	77	5	1.52		2	2	2					1	1.6	3.3	283	1649	65.66	192.26	63.17	15.8	61.87	23.428	22.185	10.779	114	7.13	590	651	20	553	306	9764	611	2.135	2.902	26.395	2.133	602	418	207.4	6.49	100.2	43.3	1278	1248	241	23.4
31967	2	2	63	2	1.75		2	2	2					1	1.3	3	323	1386	71.65	132	66.64	4.9	64.02	17.146	31.072	10.66	165	3.78	62	77	2	176	1	4207	22	0.761	0.687	22.955	1.452	95	46	246.2	2.85	6	32.2	328	990	179	7.57
31972	1	2	73	2	4.55		2	2	2					1	1.7	5.3	344	1657	55.65	158.88	56.56	11.8	92.38	43.92	28.014	13.612	242	3.37	484	513	19	365	11	0	864	1.616	1.462	14.968	1.236	204	78	217.8	2.39	35.6	85	665	935	202	7.29
31973	1	1	23	3	0.85		1	2	2		2	1	2	2	1.6	4	195	2154	109.2	264.03	14.51	22.7	70.9	17.737	30.378	16.622	493	5.22	120	131	0	133	8	8902	344	2.68	2.25	27.594	1.386	606	377	457.2	4.65	19.6	40	914	1458	297	24.3
31975	2	2	51	4	0.7	2	1	2	2					1	1.7	7.4	366	1938	131.01	209.55	128.89	22.6	67.02	31.715	19.899	8.952	457	4.09	745	824	239	698	387	1484	1314	1.189	3.314	19.222	1.724	326	0	599.8	9.69	149.1	82.7	1807	1911	419	12.9
31978	1	2	46	4	5	2	1	2	2		2	1	1	1	1.7	3.3	335	1353	75.24	171.37	27.21	12.2	40.2	15.11	14.756	6.937	142	3.15	260	270	0	120	0	4251	101	1.513	2.378	27.052	1.058	324	174	183.8	1.43	31.3	18	906	1291	243	11.09
31979	1	1	51	5	3.67		1	2	2					2	1.4	2.9	245	3546	167.34	339.46	168.1	25.5	135.9	53.63	46.875	23.035	471	8.77	415	648	199	2293	767	38509	1558	2.009	2.432	37.009	3.319	475	127	445.2	6.87	303.7	52.2	1641	2253	447	21.89
31983	1	1	22	2			1	2	2		2	1	2	2	1.9	4.2	274	2919	91.86	437.92	234.78	13.5	64.35	29.578	21.766	7.782	174	5.41	1606	1769	146	658	1336	1158	2338	5.033	6.314	60.409	7.092	1085	673	442	20.57	369.9	26.5	1854	1963	390	49.37
31989	1	1	37	1	1.04		1	2	2		2	1	2	1	2.1	4.1	332	2978	143.72	399.15	210.77	15.3	89.92	27.45	36.933	14.328	714	5.51	160	163	7	33	19	0	485	1.896	4.439	75.549	6.39	322	173	658	14.96	6.9	35.4	669	2054	324	18.8
31991	1	2	33	4	1.15	2	1	2	2		2	1	2	2	2.1	3.1	245	485	38.09	63.17	19.24	5.9	9.52	2.275	3.11	2.861	99	0.95	14	34	18	105	265	1128	595	0.326	0.317	13.167	0.822	55	0	119.1	0.36	46.1	3.1	128	489	116	2.94
31992	1	1	81	4	1.97		2	2	2					1	1.8	3.1	260	1483	51.32	196.08	85.37	21.1	60.01	22.088	23.843	12.285	352	7.29	511	717	87	2431	16	0	4753	1.862	2.177	19.07	1.911	567	348	300.6	4.52	45.6	252.8	708	1041	289	26.01
31993	1	2	61	4	2.38		2	2	2					1	3.2	6	225	1655	83.55	185.21	69.85	9.1	65.73	17.18	25.601	19.407	226	3.58	83	160	293	761	66	0	222	1.187	1.131	21.592	1.363	311	120	210.3	5.3	84.9	103.9	452	949	213	11.07
31996	2	2	28	2	1.39	2	1	2	2		2	1	2	2	2.5	5.5	480	2206	92.47	354.59	181.27	21.8	49.16	21.5	15.654	7.752	216	4.41	1470	2088	993	6794	326	1134	858	2.999	4.642	33.482	3.955	964	725	398.9	15.46	168.3	48.2	2159	2029	467	35.16
31998	1	2	39	2	1.58	2	1	2	2		2	1	2	2	2.3	6.2	454	2394	98.4	334.39	123.59	16.3	73.93	30.293	28.892	6.725	258	3.35	173	331	537	1637	29	10094	675	2.275	2.192	24.617	1.666	532	342	288.7	5.85	32.1	71.1	970	1238	250	18.7
32001	1	2	41	4	2.98	2	2	2	2		2	2	1	1	1.7	3.4	321	1493	51.93	170.75	64.81	15.7	69.45	16.896	22.712	20.959	89	8.96	806	999	498	1954	188	117	731	1.201	1.513	21.545	2.53	328	153	220.8	3.64	27.9	128.5	478	810	241	16.08
32003	1	2	77	3	4.59		2	2	2					2	1.9	3	243	2350	92.75	266.7	126.73	9.3	101.47	47.331	34.954	11.411	450	5.63	618	639	21	200	74	1891	324	1.711	2.5	31.057	1.813	391	180	377.7	4.87	53.4	21.8	755	1199	221	13.56
32008	2	1	62	3	2.65		1	2	2					2	2.1	4.9	212	2652	92.8	266.87	22.29	18.5	126.59	42.309	40.475	31.82	214	9.45	344	512	66	1989	6	16740	2774	2.159	2.486	23.931	1.213	447	228	283.2	4.22	20.1	140.6	1256	1513	416	18.79
32011	1	2	74	4	3.33		2	2	2					1	2.6	3.8	321	1377	70.15	139.09	37.37	14.5	61.29	17.818	27.657	11.431	137	4.01	24	271	1030	2423	34	1389	727	1.249	1.186	20.033	1.404	226	19	243.1	1.82	35.1	34.6	468	1037	255	7.15
32012	2	2	30	4	2.88	2	2	2	2		2	1	1	1	1.9	2.9	279	2472	56.84	351.31	107.09	11.9	94.67	32.184	39.535	16.701	89	4.84	305	335	30	345	1	8976	87	2.066	1.816	18.647	1.526	501	387	93	1.83	18	40.3	817	948	190	17.52
32013	2	2	58	5	5	2	2	2	2					2	2	6.5	370	1778	57.38	321.52	113.06	21	32.32	8.716	13.086	6.928	80	5.26	346	633	59	3353	129	5342	5474	1.507	1.533	24.343	2.362	444	197	165.9	2.92	75.9	244.7	584	970	258	16.58
32014	1	2	59	4	5	2	2	2	2					2	2	3	276	2122	82.58	156.07	50.19	21	135.79	44.643	52.499	29.907	223	9.73	283	987	2384	6998	85	2799	1562	1.018	1.427	16.394	1.618	244	14	249.1	3.73	120.8	112.9	1265	1377	300	9.77
32015	2	2	60	4	3.27		2	2	2					1	3.1	7.3	239	2022	53.86	317.92	207.42	16.8	63.82	17.688	24.251	16.403	446	7.33	407	926	38	6141	28	3411	11089	1.026	1.453	15.548	1.296	447	185	273.6	1.98	197.1	516.8	597	809	178	11.79
32017	1	2	59	1	2.08	2	1	2	2					2	3.1	3.2	451	1168	66.19	124.76	71.16	9.7	45.55	18.474	17.967	3.203	191	2	112	131	20	88	266	47	229	0.475	1.104	12.493	1.415	94	5	229.7	6.38	85.9	7.1	556	1037	199	7.72
32022	1	1	70	1			1	2	2					1	2.6	6.2	257	1621	68.83	169.82	60.2	13.6	76.68	18.229	35.205	17.951	519	5.64	325	348	33	174	169	1091	1664	1.042	2.039	9.914	0.618	236	105	417.7	3.09	16.9	32.7	614	1452	160	8.94
32024	1	1	47	2	5		2	2	2		2	1	2	1	2.6	5	296	4337	238.76	423.54	199.82	24.7	189.89	69.046	66.149	36.72	728	12.32	609	754	46	1365	685	5027	2893	2.948	4.353	61.365	4.591	523	123	830	12.78	156.1	103.4	1865	2768	559	27.25
32027		1	24	3	1.67		2	2	2		2	1	2	1	1.9	2.3	278	5316	308.27	397.48	121.65	21.1	228.48	81.893	97.361	23.994	1233	6.87	579	595	32	197	17	9064	497	4.47	5.456	60.16	5.449	692	316	1489.4	23.15	38.2	52.8	1722	3798	611	36.85
32030	2	1	80	2	1.14		1	2	2					1	1.3	4.2	216	4744	198.5	426.78	178.83	28.4	254.21	96.877	88.452	47.368	941	9.83	925	1532	2135	6078	258	1545	2909	2.698	3.8	42.478	2.744	636	322	709.3	10.26	113.8	154.2	1655	2463	453	31.49
32035	2	1	60	4	3.03		2	2	2					1	1.4	1.9	242	2020	90.74	276.11	140.04	14.1	60.87	18.833	23.307	12.512	194	6.2	494	509	0	191	0	0	266	2.375	1.624	26.473	2.101	381	248	321.7	4.47	42.9	46.7	780	1490	250	16.68
32036	2	2	44	3	3.44	2	2	2	2		2	1	2	2	3	7.6	368	2779	133.48	377.64	190.12	20.8	86.22	23.583	33.83	13.554	229	8.25	866	900	32	411	9	4880	300	1.526	2.668	30.519	2.508	380	187	379.4	5.62	13.5	64.2	1468	2100	436	20.63
32037	1	1	34	1	1.25		1	2	2		2	1	2	2	1.6	2.2	223	1595	50.21	194.89	81.99	20.9	72.81	17.72	31.458	17.208	908	8.29	341	466	268	1280	193	15093	1549	0.985	1.688	9.675	1.673	390	78	567.6	2.71	183.3	194.5	490	935	249	10.09
32038	1	1	61	2	0.62		1	2	2					1	2.3	4.2	259	2118	114.4	242.55	77.23	23.1	79.76	25.109	30.189	18.253	543	7.47	611	630	33	220	20	562	648	2.939	3.022	24.009	2.609	373	140	538.9	6.66	36.5	30.5	1289	2139	429	18.55
32040	1	1	25	5	5		2	2	2		2	2	2	2	2.2	2.7	298	2953	103.09	459.38	269.79	15.6	81.82	21.317	28.359	23.35	224	10.72	403	491	60	970	0	33900	338	2.424	2.24	39.467	2.586	508	395	290.8	6.33	37.6	59.2	810	1432	272	23.67
32042	2	2	66	2	3.37		2	2	2					2	2.3	2.6	319	1243	48.58	146.93	45.36	28.5	56.68	14.458	23.443	14.425	40	18.96	170	268	38	972	367	2341	978	0.95	0.582	11.906	2.847	960	391	175.7	6.46	116.5	23.7	675	831	415	11.55
32044	1	2	53	5	5	2	2	2	2					1	1.7	2.4	307	1158	46.54	131	72.14	6.3	51.51	14.337	14.363	18.044	113	5.08	160	364	113	2036	689	5	2372	0.921	1.206	16.016	0.963	268	97	138.3	2.13	111.7	164.3	325	468	139	8.67
32046	1	2	33	4	4.69	2	1	2	2		2	1	1	2	1.7	2	333	1053	30.79	159.59	103.56	3.8	32.64	5.98	11.448	12.475	240	3.4	56	81	2	219	39	9	284	0.542	0.575	6.581	0.429	151	77	171.2	12.65	271.2	23.9	296	421	124	8.17
32048	1	2	29	4	5	2	2	2	2		2	1	2	2	2.7	3.2	304	2263	35.5	194.11	81.66	8.4	63.04	23.087	23.535	11.52	260	4.1	154	163	41	97	5	0	439	0.816	1.856	12.774	1.428	184	49	264.2	1.29	11.8	17	810	1170	394	11.11
32055	1	2	30	3	1.61	2	1	2	2		2	1	2	2	1.7	4.2	261	1492	57.26	195.02	98.71	12.9	57.49	19.83	20.869	12.158	119	5.91	186	558	1370	3539	481	539	957	0.872	1.333	17.803	1.611	259	56	184.3	1.31	151.6	32.1	1141	965	272	8.09
32061	1	2	79	3	5		2	2	2					1	1.9	2.6	195	1129	35.03	154.87	82.7	7.5	42.98	9.188	16.239	14.011	465	6.55	322	395	28	478	749	0	1240	1.379	1.368	8.525	0.961	457	145	353.6	1.32	210.3	56.9	268	486	165	11.71
32062	1	1	73	1	0.7		1	2	2					1	2.6	6.2	273	1857	67.24	191.35	83.23	18.2	94.87	33.801	34.376	18.169	641	4.28	584	684	9	1212	10	0	395	1.12	1.822	15.261	1.495	226	79	467.9	3.94	334.5	40	950	1175	202	9.99
32066		1	65	2	4.18		1	2	2					1	1.4	4.6	257	2653	71	393.68	152.08	63.9	93.92	39.722	31.873	14.415	149	3.03	636	670	32	327	112	0	597	2.474	2.22	16.521	1.373	529	314	299.7	2.39	130.1	199.8	1201	1130	391	21.84
32067	1	2	22	3	1.53	1	2	2	2		2	2	2	1	3.1	3.4	319	2357	47.25	408.14	265.38	7.6	63.52	21.272	26.106	10.024	152	3.18	181	231	95	536	22	4471	665	1.3	1.46	15.03	0.636	318	181	147.5	3.02	37.9	34.6	666	889	152	13.27
32068	2	2	81	1	1.53		1	2	2					2	1.8	3	266	2524	52.89	306.77	177.32	16.6	127.24	53.076	50.573	15.379	149	7.24	1042	1068	0	319	30	1670	298	1.347	2.097	15.624	2.712	309	146	225.8	6.47	45.8	49.7	915	1267	274	15.3
32071	1	1	48	3	5		2	2	2	1	2	1	1	1	3.2	1.6	153	5000	154.2	824.37	521.74	32.1	130.4	49.207	48.832	21.336	385	15.47	3725	3815	72	1034	98	14485	936	7.934	11.177	103.597	10.029	1814	1567	575.8	31.43	321.8	183.4	2536	3451	644	24.07
32075	1	2	85	3	1.63		1	2	2					1	1.4	3.2	247	1347	43.32	197.26	97.26	21.8	36.21	15.038	10.98	7.069	92	5.2	721	834	328	1184	2	19947	471	1.599	2.528	18.691	1.947	373	238	198	5.74	50.3	38.5	926	1079	259	18.93
32079	1	1	50	4	5		1	2	2					1	2	2.9	243	3251	216.17	304.58	181.81	9.2	130.01	38.712	57.735	23.377	983	7.9	653	657	0	58	10	0	410	1.48	3.072	35.385	3.341	253	80	982.4	13.9	15.6	41.6	1310	2670	347	17.34
32081	2	2	35	1	0.86	2	1	2	2		2	1	2	2	1.6	3.7	274	1091	71.57	132.48	27.4	14.7	30.93	12.597	11.582	3.19	136	2.21	83	102	4	205	16	4374	109	0.647	0.824	19.823	1.366	113	60	234.6	3.1	11.7	18	516	999	214	8.33
32082	2	1	60	3	5		1	2	2					1	1.2	1.6	286	854	41.46	135.35	83.47	5.8	19.12	3.972	5.891	7.448	124	2.27	22	31	0	105	8	0	83	0.533	0.569	12.795	0.735	179	82	125.5	0.34	98.1	235.1	225	426	118	5.23
32084	1	1	79	1	1.97		1	2	2					1	1.8	3.1	219	897	55.78	81.18	9.64	4.9	29.04	8.981	11.211	5.812	99	1.43	58	66	1	88	5	0	90	0.797	1.217	15.359	0.895	140	46	162.7	1.22	2.7	12.1	470	736	131	5.54
32085	2	2	28	3		2	1	2	2		2	1	2	2	2.9	4.5	248	1232	70.45	127.46	24.18	15.3	49.95	14.789	19.897	11.021	181	2.67	88	105	15	197	13	5310	37	0.799	0.92	23.412	1.339	98	58	175.6	0.7	9.1	11.3	281	1008	255	8.73
32086	1	1	40	2	1.58		1	2	2	2	2	1	2	1	1.6	3.3	168	2514	119.85	274.89	92.84	48.6	74.55	20.461	31.725	14.94	212	5.18	6	25	18	226	23	1390	257	0.878	1.025	34.264	2.736	384	0	536.6	4.15	17.7	45.2	508	1964	464	15.8
32089	1	2	27	4	2.04	2	2	2	2		2	2	1	2	1.3	1.6	386	1018	41.29	86.1	11.96	5.1	56.3	14.454	23.884	13.434	417	4.02	358	380	0	264	8	2506	306	0.918	0.942	8.278	0.696	180	121	274.1	1.74	8.9	29.6	410	592	120	5.02
32091	1	1	30	2	2.45		1	2	2		2	1	2	1	1.5	6.3	222	4251	166.25	544.97	220.82	24.7	156.49	50.707	66.247	26.404	391	10.4	225	296	14	829	5	34421	811	4.251	3.5	50.708	2.731	654	475	434.3	4.13	84.8	74.5	1448	2371	347	30.01
32093	1	1	53	4	1.24		2	2	2	1				1	4.3	3.1	182	3318	118.27	212.98	26.41	16.9	155.27	55.309	59.842	21.783	498	3.89	264	280	7	188	19	4488	250	1.969	2.497	34.368	2.363	418	83	648.4	3.92	6.3	24.3	963	1815	382	12.8
32094	1	2	45	3	5	2	1	2	2		2	1	1	1	1.4	8.7	373	3271	123.83	327.73	141.1	23.2	166.04	65.565	67.671	20.126	379	8.62	725	850	15	1445	13	16016	1781	1.969	3.15	23.701	1.629	444	183	430	6.37	48.1	141.4	2075	2168	357	18.96
32098	2	2	21	3	2.61	3	1	2	2		2	1	2	2	2.6	2.1	183	1097	20.5	151.53	34.99	11.5	45.98	10.407	19.763	13.799	42	3.52	62	70	2	95	11	0	176	0.804	0.534	7.452	0.637	192	88	79.3	0.2	9.5	41.3	155	419	90	7.09
32099	1	1	65	2	2.73		1	2	2					1	2.3	2	332	1682	32.1	229.45	113.6	12.6	74.9	25.311	26.101	19.866	123	4.99	266	277	2	117	5	0	60	0.855	0.766	11.439	1.789	93	28	151.6	2.26	47.4	60	865	612	260	6.3
32104	1	1	33	2	2.48		2	2	2		2	2	2	2	1.6	5.4	277	3201	120.5	424.6	272.91	11.1	116.82	53.069	38.387	16.1	378	6.43	739	761	27	266	2	1502	126	1.804	5.665	27.119	1.74	371	151	412.3	5.24	10.3	28.5	1387	1879	331	12.83
32107	1	1	50	5	3.74		1	2	2					1	1.2	2.4	271	3578	145.6	487.99	234.3	37.6	125.38	35.201	45.359	33.883	370	14.5	516	1109	307	6340	1420	59718	3441	3.087	3.422	28.269	2.571	800	189	576.5	18.04	377.3	170.7	2364	3221	777	23.26
32109	1	1	32	2	4.25		1	2	2		2	1	2	1	3	6.2	376	1815	68.43	244.6	138.9	12.2	66.36	19.465	25.803	14.843	544	6.39	238	287	301	455	10	1760	466	0.755	1.028	19.469	1.376	259	95	373.9	2.31	22.1	38.1	497	899	227	13.64
32110	2	2	62	1	1.89		1	2	2					1	2.4	3	399	1679	96.76	174.97	36.61	24	69.02	16.292	32.205	15.917	282	10.05	343	523	488	1862	157	5658	917	1.149	1.397	18.313	1.463	317	64	344.5	10.06	206.3	54.1	440	1698	376	11.34
32112	1	1	41	4	5		2	2	2		2	1	1	2	1.6	5.1	228	3442	120.65	399.48	217.29	12.4	91.08	26.69	38.432	17.691	264	6.1	392	465	101	800	14	5327	422	2.003	3.676	70.961	4.556	390	207	358.7	6.5	20.3	77.1	752	1494	283	17.56
32113	1	2	62	2	1.68		1	2	2					2	2.3	2.8	218	1448	44.78	208.01	151.31	10.4	52.23	18.925	16.753	11.427	307	5.67	244	313	150	448	592	0	769	0.83	1.255	9.253	1.259	247	30	284.5	1.61	301.6	40.5	1006	798	197	6.41
32115	1	2	26	3	5	1	2	2	2		2	2	2	2	2.6	5.8	212	2289	121.82	227.2	116.72	23.5	103.69	41.494	34.166	15.945	970	9.51	662	773	82	1213	176	7390	3452	1.625	3.15	24.008	2.734	311	9	696.6	8.3	156.6	55.8	1225	1813	379	16.22
32118	1	1	62	4	4.36		1	2	2					2	2.2	6.4	215	2464	69.4	285.18	156.28	8.6	62.38	23.002	27.515	6.452	169	1.82	67	74	11	76	1	835	327	0.823	1.065	19.948	1.37	229	81	287.6	5.02	10.7	17.6	488	939	195	12.42
32120		2	72	4	2.04		2	2	2					2	1.3	3.7	260	1455	39.59	209.77	127.71	10.4	53.21	15.091	18.293	16.138	265	9.62	588	884	144	3361	262	1750	3443	1.053	1.928	16.079	1.335	323	53	238.4	3.26	53.7	232.7	543	565	162	10.64
32122	1	1	22	5	2.71		2	2	2		2	2	2	2	2.7	3.4	319	896	39.35	118.85	77.98	2.6	29.69	12.009	10.638	1.701	155	1.13	87	222	579	1320	5	129	167	0.4	0.614	7.725	0.422	91	42	105.4	3.14	19.2	8.6	555	585	105	5.09
32127	2	2	49	5	5	2	2	2	2		2	2	2	1	2.5	6.7	237	1452	58.58	159.71	120.58	13	63.51	32.373	17.899	5.698	149	3.59	191	247	422	408	65	1385	1200	0.358	1.025	17.719	0.823	157	4	186.4	1.5	11.1	114.3	708	936	217	7.54
32129	1	1	70	5	3.03		1	2	2					1	1.6	4.6	224	2016	82.96	287.45	66.38	14.8	60.19	20.096	21.346	13.63	180	4.24	313	360	5	445	208	0	409	1.879	2.09	23.253	1.533	597	377	284.7	2.25	148.5	71.7	895	1091	214	18.7
32130	2	2	20	4	3.9	2	2	2	2		2	2	2	2	1.6	4.7	226	958	47.99	112.49	39.36	8.7	37.27	11.088	16.366	8.272	88	4.88	295	331	16	405	22	0	548	0.889	1.018	23.53	1.388	182	108	125.5	0.72	35.7	44.7	214	597	149	6.99
32132	2	2	31	4	2.56	1	2	2	2		2	2	2	2	1.3	3	205	2568	127.98	291.35	134.64	15.6	100.46	29.723	39.168	22.01	492	11.75	220	634	1405	4165	191	5565	1547	1.68	1.827	36.122	3.053	391	113	530.1	6.95	170.1	112.6	1035	1838	356	17.62
32133	1	2	30	5	5	2	1	2	2		2	2	2	2	2.5	4.2	319	2745	131.2	344.68	85.04	50.6	105.15	45.01	34.945	10.294	367	9.85	429	489	36	654	136	13319	710	1.978	2.281	34.339	5.08	342	141	559.4	12.26	164.1	67.5	875	1849	525	24.69
32135	1	2	38	5	4.6	2	2	2	2		2	2	2	2	1.7	4	264	1696	84.32	147.12	3.43	10.7	85.16	31.804	35.259	12.065	232	4.81	395	412	0	197	1	0	152	1.981	2.154	18.037	0.787	333	138	188.4	2.83	0.5	28.5	937	1352	190	12.83
32136	2	2	42	4	2.9	2	2	2	2		2	2	2	2	2.3	5	380	2275	88.31	272.59	76.43	13.9	93.42	39.349	37.384	12.125	236	8.52	1081	1750	2757	6647	21	0	1768	2.441	3.343	33.845	2.368	619	425	355.6	32.65	31.6	54.2	991	1387	296	37.93
32138	1	2	47	4	5	2	2	2	2		2	2	2	2	1.2	4	343	2077	55.11	295.22	103.45	18	62.21	19.832	17.798	18.763	66	9.85	202	642	150	5190	30	6691	7453	1.707	1.483	19.563	1.203	603	320	149.4	1.51	159.6	424.9	719	872	262	14.86
32140	2	2	69	4	3.46		1	2	2					2	2.7	3.2	285	1271	34.49	217.8	84.71	14.3	31.16	9.598	12.357	6.257	86	3.01	78	812	160	8719	37	0	13802	0.942	1.006	14.051	1.716	328	100	195.5	3.2	62.1	808.4	613	510	199	10.04
32145	1	2	21	4	1.05	2	2	2	2		2	2	2	1	1.9	5.4	321	3002	122.22	244.87	78.57	10.6	112.79	34.814	40.532	28.076	263	8.16	628	660	24	368	25	579	190	1.038	2.429	30.638	2.44	319	65	428	4.47	26	54.7	1467	1846	362	10.92
32149	2	2	29	4	3.36	1	2	2	2		2	1	2	2	1.6	7.2	266	2297	71.33	296.86	95.16	16.8	95.88	25.812	38.842	23.564	146	9.14	396	449	25	238	738	418	629	1.397	1.383	24.892	2.008	434	150	273.7	4	176.5	58.8	1242	1184	430	11.89
32153	1	2	43	3	5	2	2	2	2		2	1	1	1	1.9	3.1	233	2866	87.83	399.19	236.11	26.1	98.9	39.792	37.826	12.995	288	6.06	1061	1892	2941	8516	2	0	660	1.635	3.682	30.556	1.878	454	142	419.2	5.56	100.8	218.4	1691	1850	709	22.36
32154	1	2	63	3	4.68		2	2	2					1	1.9	3.3	270	1303	51.4	117.75	62.31	17.9	74.79	15.301	29.615	24.559	115	8.35	143	308	172	1764	244	12546	834	0.575	0.822	17.429	1.418	196	9	171.3	0.36	88.8	90.9	263	561	218	6.89
32161	1	2	38	3	2.34	2	2	2	2		2	2	1	2	1.7	5.6	314	1325	48.36	96.93	45.22	5.3	42.04	20.719	12.724	5.572	137	2.1	220	248	40	317	29	699	138	0.459	0.9	6.805	0.643	153	50	88.3	3.11	21.8	22.2	1089	882	157	3.82
32163	1	2	47	1	1.68	2	1	2	2		2	1	2	2	2.2	7.1	497	962	28.33	148.53	64.48	8	19.86	9.567	6.181	2.325	69	0.6	129	133	0	6	5	0	5	0.274	0.504	6.974	0.728	49	0	128	1.93	11	2.2	307	723	151	4.18
32164	1	1	22	3	3.16		2	2	2		2	2	2	2	2.2	2.9	319	3348	159.91	356.86	99.81	28.2	145.86	40.112	62.227	27.342	884	8.52	379	428	0	609	14	5012	2361	4.981	5.839	54.523	2.99	643	274	798.9	4.26	25.1	87.9	1125	2531	439	37.31
32165	1	1	40	1	0.43		1	2	2		2	1	2	2	2.7	4.3	250	1965	63.28	345.63	107.53	31.7	41.77	11.826	13.116	13.034	148	3.93	135	186	85	473	167	1378	417	1.774	1.474	18.764	1.781	365	133	205.6	0.88	210.4	31.8	704	1472	376	12.59
32167	2	1	75	3	3.66		1	2	2					1	3.6	5.6	243	846	23.65	105.56	48.69	2.3	36.41	13.265	17.143	3.089	51	0.46	5	5	0	0	0	0	42	0.513	0.528	7.695	0.155	112	82	57.5	1.64	0	6.4	175	372	51	5.97
32168	1	1	57	4	0.84		1	2	2					1	2.7	2.3	198	3757	139	509.72	150.04	34.8	130.56	39.523	57.11	23.885	326	11.69	40	127	90	992	6	18146	719	2.614	2.348	49.919	3.478	625	301	473.1	9.31	144.1	381.6	1011	1715	456	25.69
32175	1	1	51	4	5		1	2	2					2	2	3.7	263	1781	87.39	170.34	59.18	16.5	59.76	19.572	19.34	14.351	562	7.72	278	448	70	1626	749	0	3659	2.169	1.854	20.447	2.457	417	91	479.7	3.66	268.7	231.5	431	1281	298	14.44
32179	2	2	53	1	1.57	2	1	2	2					1	2	3.7	269	781	35.28	85.26	42.06	8.9	36.34	4.455	5.132	24.432	77	1.88	20	1228	0	14487	0	0	13	0.386	0.361	5.62	1.213	74	0	117.4	0.5	27.1	6.8	276	458	173	4.52
32180	1	2	31	5	5	1	1	2	2		2	1	2	2	1.6	8.9	236	3168	112.88	407.23	186.13	33.6	127.12	49.931	46.14	19.915	369	13.97	665	4035	1263	39524	512	9789	3307	2.727	3.446	33.651	3.533	919	402	496.5	6.43	465.4	387.9	1551	2007	434	26.65
32181		1	85	3			1	2	2					1	1.1	5.8	184	2863	84.25	406.96	249.98	22.4	108.31	46.559	37.377	17.064	244	7.57	713	935	257	2500	40	37	1177	2.245	3.037	17.648	1.466	361	122	393.3	3.82	151.8	110.3	1218	1748	422	20.91
32183	2	2	23	3	1.12	3	2	2	2		2	2	2	2	1.2	4.3	158	538	8.19	115.01	81.39	1	5.89	2.115	2.121	1.183	15	0.58	12	23	0	133	0	1337	43	0.189	0.152	2.364	0.144	81	50	19.4	0.34	10.6	3.9	100	109	48	2
32193	1	1	76	4	3.13		2	2	2					1	0.5	3.1	202	2387	89.85	216.11	101.63	22.5	79.25	21.909	32.144	18.821	672	10.19	721	1126	86	4560	517	1278	7696	1.638	2.899	15.922	4.196	951	468	582.3	12.25	250.4	401.7	1488	1744	482	34.52
32197	1	2	43	1	1.6	2	1	2	2		2	1	2	2	2.6	4.8	299	1288	27.89	168.99	48.18	23.8	60.2	17.23	26.918	12.043	221	4.59	126	151	49	269	35	2187	426	1.123	1.157	11.956	1.071	291	99	175	0.84	27.2	38.8	600	721	289	8.75
32198	1	2	21	4	5	2	1	2	2		2	2	2	1	2.6	7.2	263	2803	88.59	318.5	90.61	18.4	126.33	49.72	41.638	24.503	231	11.02	826	835	0	135	0	0	84	2.357	3.274	37.363	3.249	667	479	251	7.22	64.7	47	1373	1760	394	22.95
32199	1	2	27	4	2.73	2	2	2	2		2	1	2	2	1.9	4	355	2919	167.26	257.35	148.96	7.5	135.51	57.124	47.402	19.403	480	4	481	505	17	230	184	2145	197	1.731	2.674	51.346	2.589	278	162	441.6	6.52	45.7	25.2	1495	2345	268	15.04
32200	1	2	60	1	1.9		1	2	2					2	2.2	3.2	263	2952	125.08	318.64	89.75	22.1	132.82	52.264	54.57	16.755	304	6.77	496	597	91	1149	39	16187	752	2.266	2.532	28.367	1.842	476	282	373.7	8.03	134.8	60.2	1561	1962	372	22.1
32201	1	2	53	4	4.05	2	2	2	2					1	2.4	3.7	259	757	31.93	98.04	22.78	8.6	27.13	12.057	8.024	4.427	57	2.39	200	901	2808	7001	0	334	590	1.101	1.382	11.501	0.941	455	355	70.1	1.97	29.8	33.2	777	718	126	13.45
32202	1	1	81	3	1.95		1	2	2					1	1.4	3.6	310	1730	78.9	186.92	64.43	14.7	62.76	21.133	23.236	10.401	586	7.37	217	684	97	5554	12	16116	730	1.696	2.446	26.516	1.514	375	155	480	4.28	98.8	108.2	611	1078	269	13.08
32204	1	2	40	4	4.91	2	2	2	2		2	1	2	2	2.6	3.2	338	1419	29.84	177.68	103.68	8.2	57.82	17.895	20.933	14.855	112	2.59	76	97	41	234	1	515	539	0.494	0.643	8.748	0.696	114	37	114	1.96	6	25.1	156	469	112	6.57
32205	1	2	35	3	2.86	2	1	2	2		2	1	1	2	2	4	317	1326	55.08	176.24	83.32	9.7	47.29	17.812	13.829	11.818	164	4.63	115	163	47	562	4	0	986	1.135	1.411	13.674	0.576	376	188	211.8	1.42	21.2	62.4	726	974	269	10.5
32208	1	2	36	3	3.63	2	2	2	2		2	1	2	2	1	2	188	2669	78.92	293.61	69.51	15.7	119.73	35.598	49.951	27.701	179	7.48	227	257	2	350	7	6924	190	1.815	1.585	29.231	1.702	348	192	225.6	4.83	20.1	84.2	576	1078	249	17.02
32211	1	1	55	4	5		2	2	2					1	2.4	4.9	333	1435	43.3	204.51	105.99	11.5	53.41	17.004	21.923	10.488	46	6.75	480	485	30	58	0	0	127	1.623	3.042	21.012	1.794	558	395	174.7	4.08	26.8	15	867	968	278	14.91
32212	1	1	46	3	2.73		2	2	2		2	2	2	1	1.5	3.2	191	2237	88.44	246.49	107.12	15.1	101.41	32.442	40.125	18.905	626	5.02	335	398	94	672	53	11765	589	1.309	2.505	19.608	1.128	313	153	456.2	3.61	21.4	55.5	720	1305	208	17.47
32214	1	2	45	3	0.97	2	2	2	2		2	1	1	1	1.9	6.3	411	2523	60.99	352.92	175.15	30.2	99.77	28.378	43.254	19.343	685	8.22	599	628	85	301	47	0	1022	1.73	4.514	22.737	2.511	416	68	541.3	2.14	88.8	69.9	859	1156	423	14.72
32216	1	2	53	4	3.12	2	2	2	2					2	2.5	2.8	382	1634	66.56	204.05	92.52	11.7	63.83	14.382	23.546	20.189	488	6.56	224	309	13	967	101	0	1638	1.007	1.23	20.234	1.406	379	150	388.6	1.68	107.9	141.8	264	1018	178	11.86
32221	1	1	36	3	5		2	2	2		2	1	2	1	2.5	4.6	180	4411	147.71	463.73	147.92	18	179.48	77.405	59.095	29.082	380	10.13	792	845	12	631	2	18025	217	3.29	3.785	31.437	1.005	790	484	225.6	5.29	23.9	88.5	2715	2610	345	25.71
32223	1	2	23	3	2.62	2	2	2	2		2	1	2	1	1.5	4.4	250	3879	42.43	564.87	326.3	9	109.14	31.5	31.357	37.796	72	7.52	110	127	0	158	42	8306	440	1.178	1.092	15.596	0.794	266	116	111.1	1.2	35.2	58	501	716	155	9.66
32225	1	1	23	2	0.93		2	2	2		2	2	2	2	2	2.4	234	3823	124.05	501.02	197.26	18.4	147.96	51.514	55.768	27.021	266	12.23	1166	1202	30	469	8	6539	591	3.441	4.719	48.271	4.108	811	560	371.2	10.87	55.9	69.9	1649	1969	330	35.85
32226	1	1	40	5	5		1	2	2		2	2	2	1	1.6	1.4	236	1997	75.03	318.33	130.69	8.1	46.45	15.115	16.85	10.694	185	3.48	188	196	0	82	0	1636	91	1.787	1.486	23.751	1.27	477	377	154.4	2.33	1.5	16.8	699	1044	210	16.81
32229	1	1	61	5	5		1	2	2					1	3.3	4	351	2386	81.68	300.27	141.79	8.4	94.3	29.359	38.433	19.998	384	6.6	135	193	65	604	121	1486	388	1.547	1.731	19.413	0.983	377	257	383	4.29	24.5	56.4	670	1362	229	14.29
32230	1	1	59	5	4.29		2	2	2					2	1.8	4.3	389	3519	141.17	400.81	237.07	17.2	159.4	43.641	52.919	50.529	756	18.46	1000	1166	4	1953	116	10065	2013	1.925	3.378	38.529	4.415	889	454	720.6	12.27	85.2	190.9	1329	2072	389	27.24
32239	1	2	60	3	4.77		2	2	2					1	2.1	3.4	290	914	39.23	80	6.46	4.9	48.53	17.717	18.316	8.434	79	3.65	84	104	0	230	0	13261	60	0.825	0.834	8.247	0.338	145	93	64.5	1.4	11.4	19.7	606	610	93	6.84
32240	2	2	35	4	3.51	2	2	2	2		2	1	1	2	3.4	2.4	283	1043	19.68	162.59	79.91	5.3	37.25	10.287	15.02	9.711	120	3.6	92	153	191	631	55	1504	420	0.51	0.547	6.672	0.743	143	67	97.2	0.52	126.4	66	239	406	90	5.13
32241	1	1	25	4			2	2	2		2	2	2	1	1.6	1.8	211	3139	57.57	468.31	258.52	8.6	72.27	21.521	28.773	14.841	118	5.11	334	359	15	137	0	6924	348	2.156	2.437	34.655	2.638	443	311	256.9	6.68	26.1	30.5	451	916	217	23.6
32245	1	1	61	5	5		2	2	2					2	1.1	3.9	149	1991	123.53	215.67	76.56	25.2	77.01	23.808	23.76	21.703	581	15.19	480	1866	302	16420	169	329	30374	1.936	2.984	35.504	2.315	740	178	597.7	10.78	71.6	1109.5	1532	2078	596	37.6
32246	2	2	27	1	1.71	1	1	2	2		2	1	2	2	1.5	3.7	220	959	42.29	149.82	89.35	10	23.04	9.903	6.891	2.948	249	2.58	332	391	37	237	910	0	1028	1.123	1.423	12.363	1.65	367	177	248.1	3.76	218.2	8.6	1413	792	203	12.83
32249	1	1	21	3	5		2	2	2		2	1	2	2	2	6.8	327	4991	191.55	414.64	90.44	13.6	180.66	53.261	77.959	36.007	829	8.48	299	306	8	57	16	8	416	3.213	3.439	70.069	3.682	509	212	864.1	5.17	5.5	48.2	1274	3011	459	17.44
32250	1	2	29	5	5	1	2	2	2		2	2	2	2	1.6	7.2	194	2321	101.32	306.82	132.97	32.1	85.3	17.494	36.203	24.757	198	31.6	324	1605	4211	13148	244	3317	2005	1.55	1.866	33.792	5.308	850	612	321	11.24	141	144.4	981	1389	523	17.38
32251	1	1	35	3	1.47		2	2	2		2			1	2.4	4.7	267	1870	67.37	248.67	160.51	5.7	69.43	25.126	25.555	12.99	200	4.02	169	180	1	137	11	0	213	1.848	1.723	19.417	1.287	223	103	256.4	3.32	5.7	32.1	289	900	157	9.05
32254	2	1	65	5	2.81		2	2	2					2	1.6	7	227	1451	55.23	253.03	139.41	8.2	25.37	7.266	11.844	4.678	131	1.69	339	343	34	36	1	0	89	2.118	1.298	24.728	2.717	137	75	234.7	2.97	32.3	11.6	345	1165	142	10.47
32256	1	2	42	1	0.85	2	1	2	2		2	1	2	2	2.3	4.6	246	1373	37.64	241.95	109.2	6.5	29.18	6.9	11.508	8.491	103	2.8	418	552	521	1359	5	0	416	1.033	1.091	18.456	1.673	234	180	126.7	2.35	44.9	49.2	436	726	120	11.16
32268	1	1	65	3	1.63		2	2	2					1	2.9	6.5	332	1791	59.61	200.08	100.05	10.5	84.3	30.173	32.648	15.278	120	9.8	606	622	0	223	0	835	32	1.869	6.441	24.82	2.396	378	182	327.6	10.15	6.9	53.4	1085	1348	393	26.87
32270	2	2	57	4	2.71	2	2	2	2					2	1.6	2.7	203	1621	61.94	285.93	114.33	27	32.06	7.933	10.492	9.611	29	11.21	288	377	46	953	181	8329	770	3.517	2.575	21.72	2.747	621	362	214.8	9.38	71.8	60.3	1299	1450	538	19.25
32271	1	1	83	5	5		2	2	2					1	1.3	3.1	186	3394	105.79	495.54	274.93	41.5	116.21	36.15	43.049	29.071	251	10.66	243	1184	2567	9877	222	0	4470	3.549	2.615	25.721	3.342	651	121	488.1	3.11	149.1	188.1	1214	1939	551	19.12
32272	1	2	83	2			1	2	2					1	1.5	3.7	251	737	13.15	114.68	58.36	7.1	26.34	6.368	10.326	7.707	32	2.09	28	52	45	243	16	1158	152	0.54	0.616	6.154	0.383	90	54	59.6	0.22	16.2	19.3	153	292	68	4.07
32273	1	1	28	1	1.33		1	2	2		2	1	2	2	0.9	6.5	213	1097	72.72	91.63	38.31	2.3	26.35	8.703	10.53	3.214	182	2	16	29	2	149	1	4162	175	0.375	0.686	17.911	1.412	109	31	322.8	4.2	20.5	14.4	122	641	122	8.46
32279	1	2	73	4	5		2	2	2					1	1.4	2.1	251	1922	95.97	222.42	50.72	24.6	58.94	12.402	20.033	21.412	440	6.3	173	200	62	297	3	4133	1838	3.141	1.956	26.922	1.438	234	91	372.5	3.41	22.2	21	688	1414	423	19.4
32283	1	1	62	1	0.75		1	2	2					2	2.2	4.2	294	1720	85.35	206.77	74.26	17.7	63.22	19.966	23.741	12.934	743	5.31	408	575	508	1749	58	9951	1081	1.01	2.293	14.76	1.526	262	71	572.8	5.56	115.4	80.7	751	1559	288	13.16
32286	1	2	21	3		2	2	2	2		2	1	2	1	1.7	3.6	311	2216	53.89	238.11	132.51	7	77.19	24.945	34.459	11.482	162	4.1	22	69	31	259	534	2744	571	2.139	1.331	19.495	1.418	262	127	245.8	1.78	138.4	25.1	405	925	152	10.52
32287	1	1	35	3	2.42		2	2	2		2	1	2	1	2	4.2	275	2482	94.97	246.23	91.68	8.1	92.16	26.72	34.272	24.003	393	4.2	379	405	114	244	44	0	568	1.532	2.603	28.837	1.768	328	97	467.8	12.43	24.5	68.5	1013	1684	279	12.17
32290	1	2	43	3	5	2	1	2	2		2	2	2	1	1.7	4.1	334	1512	83.56	149.65	74	17.9	69.55	12.413	19.124	30.567	179	18.51	273	497	758	2285	14	13	849	2.026	2.675	44.993	3.533	557	341	262	5.83	111.7	208.5	1212	1049	265	21.22
32292		2	24	4	1.36	1	2	2	2		2	1	1	2	2.4	5.3	313	2944	104.24	300.45	211.47	7.7	150.84	79.777	46.031	11.41	809	4.09	1118	1140	0	261	8	2777	350	1.352	3.499	13.965	0.938	243	109	493.6	6.79	5	13.8	2151	2202	234	10.52
32294	1	2	77	3	2.5		1	2	2					2	1.3	4.7	260	1374	49.22	190.24	74.5	13.6	48.77	14.365	16.6	13.546	116	4.22	130	193	85	673	74	6799	502	0.902	0.961	11.249	1.072	259	141	131.5	1.15	43.8	51.1	479	740	183	9.73
32295	1	1	50	5	5		2	2	2					2	1.4	4	255	2161	64.83	342.73	222.38	15.1	65.61	22.475	19.803	17.35	209	6.71	345	608	116	3106	8	2060	3118	1.882	2.23	20.298	1.998	411	191	223.7	7.76	39.6	219.8	1021	1319	246	20.78
32296	2	1	43	5	3.11		1	2	2		2	2	2	2	2	6.5	301	2388	85.58	331.21	187.9	11.1	83.02	33.918	28.588	12.335	498	6	441	940	2125	4867	134	0	722	2.706	1.711	21.469	1.804	332	202	390.7	3.82	20.6	38.1	551	1095	158	16.47
32298	2	2	62	3	2.65		1	2	2					2	3.1	4.8	328	1263	42.18	174.61	79.27	9.2	47.58	14.606	17.37	12.695	104	5.23	122	423	1147	3016	12	1582	1661	1.34	1.243	14.636	0.995	250	96	168.8	1.05	64.9	40.4	462	623	202	6.53
32300	1	1	53	5	5		1	2	2					1	3.3	2.6	312	950	15.12	122.37	63.5	5.9	33.23	10.51	17.046	3.752	31	1.01	0	19	43	204	3	172	212	0.407	0.421	5.94	0.555	93	30	59.5	0.96	43.2	17.1	102	274	68	4.11
32303	1	1	30	2	1.55		2	2	2		2	1	1	1	2.2	5.6	247	2187	24.17	451.77	383.54	2.8	20.65	8.857	7.166	2.347	54	0.86	0	2	0	17	13	485	54	0.693	0.682	9.332	0.471	157	90	80	0.98	71.2	4.7	281	586	67	6.17
32304	1	1	34	3	0.99		2	2	2		2	2	2	1	2.8	4.1	359	2248	106.12	272.15	245.35	4.1	81.62	37.731	28.609	5.444	325	2.18	361	391	24	331	34	1132	89	1.05	3.379	17.511	1.402	160	46	367.6	10	363.9	14.8	1817	1762	235	8.66
32312	1	1	83	1	2.2		2	2	2					1	2.7	3.6	170	2028	70.33	264.84	137.21	29.3	84.76	26.047	25	27.31	308	8.8	707	1287	128	6797	245	407	1788	3.331	3.2	37.043	4.036	782	509	339.1	8.11	289.5	87.7	562	1219	329	30.63
32316	1	2	85	2	0.51		1	2	2					1	2.4	4.2	195	3479	57.51	594.01	445.92	19.1	106.42	27.368	43.651	27.845	113	10.45	1026	1128	86	1112	208	0	1172	1.631	2.042	21.187	1.656	464	269	242.5	3.43	116	112.4	789	1085	317	17.83
32321	1	1	66	5	2.58		2	2	2					1	1.6	2.6	162	1490	94.94	207.13	104.49	18.3	34.84	14.494	11.257	5.672	196	3.59	478	863	35	4595	13	515	8026	1.331	2.275	33.894	2.187	366	113	274.4	1.85	39.9	359.6	1017	1448	355	15.66
32324	1	1	34	5	5		2	2	2		2	2	2	2	1.9	4.3	274	2532	80.3	383.7	158.87	17.1	69.37	26.917	23.945	12.461	163	24.93	493	545	19	329	510	11494	604	4.609	4.658	51.912	4.256	1020	806	258.6	11.73	128.4	27.7	2512	1480	270	42.57
32325	1	1	36	1	2.73		1	2	2		2	1	2	1	1.9	4.2	393	1410	46.46	246	149.06	10.5	29.84	13.749	9.828	3.704	117	1.55	122	216	324	942	17	4861	221	1.217	0.973	14.34	0.76	246	147	118.4	1.33	21.7	27.9	488	632	206	10.04
32328	1	2	81	4	1.14		1	2	2					1	3.8	5	252	2295	49.68	263.89	154.44	15.5	73.32	28.165	22.425	20.772	174	10.58	517	653	71	1513	149	772	1633	0.941	1.49	13.878	2.731	394	84	265	4.11	173.1	251.7	861	1135	245	9.11
32333	1	2	45	3	1.22	2	2	2	2		2	2	1	1	2.3	5	342	1186	31.39	167.79	73.3	8.8	44.43	18.059	16.694	7.074	120	3.34	339	410	4	874	1	0	1101	1.154	1.784	8.862	0.364	320	170	154	1.18	8.6	108.8	601	575	138	10.72
32334	1	1	43	3	1.98		2	2	2		2	1	2	1	2.1	5.2	264	1380	53.45	129.57	36.02	11.5	20.8	8.475	7.646	2.283	100	1.89	158	849	2839	6877	0	2273	2583	0.743	1.343	19.641	1.664	251	17	386.4	3.31	36.1	42	493	984	254	8.59
32338	2	2	35	2	1.08	2	1	2	2		2	1	2	2	2.7	4.5	369	2442	75.21	401.22	194.28	24.3	62.04	15.907	22.444	15.93	301	9.29	143	745	7	7195	87	23842	303	2.029	2.006	20.729	1.233	480	233	283.7	1.81	123.6	49.8	918	1177	330	17.33
32343	2	2	61	3	5		1	2	2					2	1.6	2.1	194	2066	73.18	254.44	130.99	14	86.9	28.72	31.113	17.226	161	5.36	127	215	99	965	56	10311	409	1.365	1.301	19.677	1.111	309	129	188.4	4.12	27.8	111.8	703	993	223	14.08
32345	1	2	24	5	1.43	2	2	2	2		2	2	2	2	1.9	3	224	1224	69.07	158.88	27.57	11.9	34.94	7.92	12.678	11.197	117	5.36	119	289	430	1831	23	17758	778	1.186	1.118	23.336	1.1	335	242	159.8	0.47	34.2	50.9	352	685	198	12.03
32349	2	2	32	4	0.56	2	2	2	2		2			2	2.3	3.6	439	3010	101.06	337	184.74	9	142.63	32.919	49.341	49.62	651	8.27	315	418	300	849	428	1	809	1.536	2.172	22.422	1.661	390	132	462.7	5.75	150.8	124.7	924	1323	300	15.32
32350	1	1	76	2	2.19		1	2	2					1	1	3.2	203	2000	36.9	139.01	78.63	9.7	90.1	30.437	42.759	9.575	545	3.92	1722	2285	125	6686	40	272	10888	0.607	1.708	9.596	0.682	296	57	415.7	18.35	27.5	614.9	378	802	125	12.14
32355	1	1	63	1	0.95		1	2	2					1	2.6	3.7	276	1879	43.61	319.77	215.63	11.9	50.06	20.536	16.409	6.063	442	5.07	221	309	46	339	1366	3364	1396	1.326	1.354	10.185	1.317	371	104	337.9	2.34	318.7	17.3	542	835	256	13.83
32357	1	1	31	4	4.13		2	2	2		2	2	1	1	2.4	6.4	562	1124	63.48	91.39	10.89	7.4	55.54	19.099	24.31	5.995	159	1.73	47	75	53	302	32	1864	163	0.873	1.332	17.007	1.012	139	46	185.8	3.98	11.4	46.8	420	951	145	10.94
32358	1	1	53	1	1.4		1	2	2					1	2.2	5.5	250	4755	232.44	409.27	69.78	55.1	241.33	82.251	111.664	33.654	579	7.42	5	22	5	210	5	10950	291	6.572	3.208	52.68	4.752	724	297	821.1	9.85	98.4	51.9	958	2734	567	32.18
32359	2	2	41	4	1.65	2	2	2	2		2	1	2	2	2.1	6.3	376	1679	79.34	148.59	91.89	6.8	85.93	21.727	27.44	28.149	415	6.79	167	256	7	1015	91	2164	1517	2.873	1.14	15.965	1.135	148	20	322.9	2.29	52.4	143.9	676	829	189	7.17
32360	1	2	55	3	5	2	2	2	2					1	1.5	4.5	278	1500	81.31	197.71	59.82	7.3	42.79	17.378	12.553	8.596	123	13.46	888	901	12	185	0	579	75	3.189	4.131	34.35	4.991	1235	1065	225.6	17.02	47.2	34.1	992	1400	221	26.95
32361	2	1	24	3	0.62		1	2	2		2	1	2	2	2.2	5.8	192	1527	64.82	153.83	48.42	11.5	74.18	20.023	31.027	16.25	309	4.14	170	182	6	143	6	836	184	0.744	0.912	16.362	1.231	115	38	257.2	2.59	30.6	26.1	388	1195	192	8.32
32363	2	2	32	2	4.25	2	2	2	2		2	1	2	1	2.5	5.3	155	2471	74.89	340.9	133.99	23.6	93.81	33.933	33.876	18.223	136	5.2	295	311	47	190	0	288	335	1.549	1.837	25.604	2.053	364	183	226.5	2.86	39.6	33.7	1182	1470	337	20.2
32368	2	2	42	4	3.94	2	2	2	2		2	1	2	2	2.2	5	190	1905	38.56	248.4	143.68	13.9	88.31	22.461	34.634	23.627	119	5.6	63	121	70	548	195	4234	578	1.068	1.051	12.81	1.127	232	106	140.3	1.82	85.9	82.8	401	531	160	8.89
32370	1	1	31	5	1.86		2	2	2		2	1	2	2	3	3.7	215	1461	57.01	189.74	91.41	11.4	55.12	20.084	22.515	8.053	154	4.56	397	447	73	547	36	3133	485	1.046	1.319	17.275	2.387	426	336	171.1	7.53	21.3	32.1	508	822	203	10.64
32377	1	2	72	3	2.76		2	2	2					1	2.3	7.8	456	680	19.7	97.93	51.2	2.7	23.56	9.732	8.329	3.761	42	1.2	210	218	0	96	0	0	8	0.4	0.593	2.904	0.116	82	67	33	0.55	0.1	12.5	394	367	54	3.49
32378	2	2	20	2	1.49	2	2	2	2		2	1	2	2	2	1.9	328	1281	24.52	198.41	137.88	4.4	44.38	13.864	23.52	4.745	46	3.11	6	6	0	1	0	0	16	0.615	0.36	5.737	0.318	112	67	110.9	0.41	3.1	20.2	153	486	64	7.88
32381	1	2	32	5	1.24	1	2	2	2		2	1	1	1	1.8	5.9	279	2414	138.33	203.54	77.66	20.8	99.71	29.204	35.369	26.522	727	11.93	688	1063	947	3998	95	1454	3772	1.829	2.896	30.777	3.166	503	72	712.4	4.19	98.6	223.5	867	1708	372	15.1
32382	1	2	38	5	4.1	2	1	2	2		2	1	2	2	1.4	3.3	200	1671	75.66	161.31	61.66	19.5	72	23.557	26.171	14.992	196	6.94	438	1607	1348	13320	36	9463	5209	1.064	1.948	14.242	1.511	257	22	343.8	5.15	50.6	216.6	1110	1314	328	10.75
32383	2	2	83	3	3.41		1	2	2					2	1.3	4	232	1590	75.23	221.07	103.21	16.6	47.89	12.351	17.736	11.673	176	8.18	529	649	251	1183	98	10870	1159	1.422	2.401	26.377	2.29	425	203	316.7	4.85	83.9	127	690	1196	269	17.37
32385	2	1	28	1	0.61		1	2	2		2	1	2	2	2.6	5	311	2251	44.62	390.29	215.16	7.6	58.41	11.801	22.295	16.238	167	3.88	13	13	0	0	0	0	27	1.284	0.807	15.806	0.659	289	243	91.1	0.91	1	22.6	575	715	166	11.53
32386	1	1	34	5	5		2	2	2		2	1	2	1	2	2.3	295	3640	75.4	493.78	191.15	27.7	108.65	47.269	37.75	16.115	278	6.85	555	1530	3645	9870	58	1213	2139	1.981	2.851	28.925	2.969	625	233	397.1	1.53	242	152.6	1010	1397	468	20.49
32388	1	1	55	3	3.34		2	2	2					1	3.7	5.9	334	1437	62.14	153.06	107.56	5.6	64.39	20.237	27.222	10.346	245	3.48	132	368	23	2817	3	0	117	0.776	1.668	16.857	1.053	157	51	271.3	5.39	57.6	17.4	285	678	135	7.61
32389	1	1	28	4	1.52		1	2	2		2	1	2	1	2	4.9	197	1701	82.63	222.75	125.33	9.9	33.82	8.182	14.687	7.485	226	1.91	32	60	1	297	62	0	199	0.606	0.907	37.712	1.84	174	42	301.5	1.04	19.1	27	429	1039	205	8.55
32393	2	2	20	3	0.51	1	1	2	2		2	1	2	2	2.1	5.2	254	1396	75.11	153.81	79.36	11.4	53.79	22.085	21.186	6.033	184	1.97	76	95	12	203	18	0	218	1.146	1.264	13.846	0.992	83	3	242.8	1.45	13	25.4	338	861	191	5.5
32396	1	1	20	2	0.95		1	2	2		2	2	2	2	2.4	4.1	412	1698	37.51	191.33	100.44	4.4	44.83	9.296	16.48	16.431	85	3.08	57	77	25	227	1	2116	188	0.671	1.052	21.79	1.468	250	68	265.2	0.96	7	29.5	275	649	178	5.35
32401	2	2	40	3	1.16	2	2	2	2		2	1	1	2	2	4.2	258	2020	33.1	333.29	239.83	10.3	67.9	20.13	20.088	22.93	70	8.41	186	1178	3753	9654	677	772	4160	1.124	1.517	9.634	1.235	303	59	156.8	1.78	195	213.5	546	795	172	10.04
32403	1	2	78	3	1.63		2	2	2					1	0.8	3.2	264	2436	68.7	294.57	176.51	11.5	114.05	52.829	41.47	9.102	405	6.72	666	795	479	1300	4	4072	405	1.568	3.046	20.637	1.113	323	190	349.4	4.26	95.2	27.5	1014	1281	334	13.48
32405	2	2	36	3	4.27	1	2	2	2		2	2	1	2	2	9	342	1249	68.03	154.28	72.4	14.4	42.32	18.277	12.647	7.414	179	3.98	256	299	157	345	168	2	585	1.221	1.435	21.825	1.947	228	77	238.1	2.66	95.3	50.8	809	1025	219	7.89
32406	1	1	50	4	5		2	2	2					1	1.4	4	308	4479	121.98	457.97	201.03	42	208.61	42.567	98.996	54.571	88	32.71	84	133	94	479	170	0	573	2.066	2.32	54.564	3.661	584	182	383.4	5.97	46.3	126.7	809	2185	903	25.33
32408		1	39	2	1.93		1	2	2		2	1	2	2	2.3	3.3	213	2468	69.97	363.77	203.96	10	83.57	25.985	31.822	18.921	239	6.25	260	286	13	284	11	510	359	1.546	1.897	20.407	0.785	458	274	208.9	2.27	27.8	49	852	1067	173	15.13
32409	1	2	24	1	1.54	2	1	2	2		2	1	2	2	2.8	2.8	367	2130	77.39	248.23	95.35	18.2	94.32	34.626	36.841	17.802	195	5.17	222	285	74	728	6	10053	239	0.99	0.968	20.153	1.862	262	82	257.7	4.59	25.1	73.6	691	1157	231	11.52
32414	1	2	78	3	1.97		2	2	2					2	1.5	2.8	221	1859	59.01	197.92	90.3	17.5	95.92	29.341	37.07	26.26	399	11.12	625	1116	1079	5348	23	0	6006	1.997	2.467	19.423	1.71	561	313	343.8	4.19	45.5	293.9	694	1112	262	16.74
32416	1	1	83	1	1.02		1	2	2					1	1.5	5.5	341	1067	33.81	146.99	34.41	7.9	40.3	11.873	16.638	9.153	32	4.26	426	482	124	606	0	6097	203	1.894	2.947	26.668	1.396	487	367	109.3	3.5	50.3	25.6	425	620	172	22.84
32419	1	2	29	4	1.17	2	2	2	2		2	1	2	2	3.1	5	322	1215	42.44	176.4	103.64	4.8	38.76	13.552	14.201	7.503	430	3.49	304	324	1	226	16	5060	365	0.977	1.328	7.301	0.569	267	133	260.5	10.13	38.3	19.5	674	705	182	9.47
32428	1	2	63	3	3.5		2	2	2					1	2	1.6	238	1266	42.3	167.37	59.41	9.6	39.78	13.23	16.252	8.104	65	3.26	52	84	21	254	222	2519	266	1.128	1.353	16.96	0.796	240	82	137.5	1.85	54.2	47.6	559	523	192	9.56
32429	1	1	21	4	5		2	2	2		2	1	2	2	2.5	5.1	386	1465	48.16	105.39	14.9	9.9	96.84	26.264	32.698	31.701	80	8.62	136	298	0	1941	0	6597	2802	1.022	1.77	14.035	0.457	299	102	107.3	1.22	18.1	220	690	878	182	8.88
32436	2	2	51	3	4.24	2	1	2	2					1	2.9	5.1	337	2593	53.73	246.81	69.05	17.3	119.85	38.773	35.115	35.011	211	9.74	318	492	649	1730	27	4	760	1.364	2.317	17.214	1.362	335	137	205.4	1.88	61.9	132	979	1018	257	10.49
32437	1	1	25	4	5		2	2	2		2	1	2	2	1.7	2.3	241	2880	125.97	463.02	161.52	11	62.96	23.349	23.401	10.76	284	5.42	1261	1282	4	206	127	0	339	2.85	3.287	57.855	3.999	563	423	328.3	6.78	252.2	38.9	1305	1812	294	19.68
32439	1	2	85	1	0.83		1	2	2					2	1.4	4.2	246	1088	42.37	131.31	59.19	10.2	45.07	13.713	17.226	9.798	437	2.93	629	708	203	851	10	0	770	0.975	2.049	11.755	1.235	214	103	353.7	3.27	30.6	34.7	701	980	197	9.38
32440	1	1	72	2	1.19		2	2	2					2	1.3	4.8	243	1165	50.5	133.54	52.87	5.6	48.87	18.945	18.86	7.233	232	2.28	147	157	9	117	7	1021	184	1.564	1.329	13.574	0.702	256	120	204.5	1.58	6.4	10.6	574	782	149	7.83
32441	1	2	38	4	2	2	2	2	2		2	1	2	1	2.5	4.1	361	3842	118.34	359.55	167.27	14.3	86.78	26.991	33.141	20.059	286	7.47	377	563	65	2171	125	593	2922	2.919	2.929	40.732	2.888	621	174	583.2	8.87	69.9	170.3	1015	1748	380	16.68
32442	1	1	72	1	2.73		2	2	2					1	1.9	2.1	262	1673	79.82	178.44	70.34	28	64.83	16.508	28.907	14.113	200	9	254	625	1284	3800	18	1453	4172	0.885	1.462	22.089	1.61	235	46	326.4	3.49	65.3	72.7	750	1422	400	10.97
32443	2	2	69	4	3.11		2	2	2					2	2.2	5	337	1564	69.94	203.11	63.42	16.3	54.94	14.762	21.009	13.166	126	4.68	603	1323	2930	7101	207	5457	835	3.101	1.948	24.901	2.212	430	319	223.4	4.27	45.7	58.9	523	874	236	17.39
32444	9	1	85	1	1.95		1	2	2					1	2	3.5	195	1785	74.12	225.05	121.91	16	68.36	25.92	24.64	11.347	301	3.7	340	496	711	1539	3	0	652	1.012	2.17	12.153	2.129	191	40	351.1	7.4	32.1	39.4	1009	1346	308	8.98
32447	1	1	65	4	3.41		2	2	2					1	1.5	2	196	2702	87.28	295.66	95.18	19.1	116.13	37.992	36.32	33.468	516	14.11	646	1163	2483	4936	54	0	1197	1.769	2.839	29.742	2.557	372	174	423.2	4.93	54.1	126	757	1312	287	27.92
32452	1	1	74	5	5		2	2	2					1	2	3.4	251	1563	55.25	224.48	96.82	19.1	38.21	11.556	14.807	8.753	90	5.09	554	812	50	2868	345	0	404	1.72	1.861	26.566	3.509	725	561	168.5	8.48	147.1	12.7	733	997	351	17.83
32455	1	1	85	5	3.79		2	2	2					2	1.1	5.8	363	1373	41.37	173.17	75.1	13.9	55.13	15.491	25.18	9.894	416	5.94	596	654	53	568	193	0	544	1.565	1.867	19.259	1.74	590	417	314.2	4.14	80.6	11.2	575	907	311	19.84
32459	1	2	62	4	0.82		2	2	2					1	1.6	4	211	1317	42.1	143.54	46.8	13.9	65.44	23.589	25.354	11.061	90	4.1	263	294	184	286	28	458	577	1.036	2.588	13.667	1.139	241	55	258.7	2.68	26.9	71	694	836	244	10.33
32467	1	2	48	3		2	2	2	2		2	2	2	2	2.2	2.9	268	1023	35.48	93.85	43.52	12.1	23.19	8.495	10.1	2.699	82	3.25	63	1093	1314	11689	0	0	873	1.21	1.293	9.533	0.665	105	26	172.2	0.73	25.7	41.2	188	458	130	5.45
32477	2	2	41	4	2.38	2	1	2	2		2	1	1	2	3	7.4	232	1311	63.89	155.81	52.44	5.9	48.29	17.777	15.199	11.53	175	2.57	240	249	1	80	38	0	221	0.866	1.181	12.706	0.538	197	125	132.9	2.64	73.9	23.5	701	877	143	6.68
32478	1	2	27	5	5	2	2	2	2		2	2	2	2	2.5	3.4	191	1458	98.29	112.06	53.46	7.1	68.28	26.803	24.302	11.038	312	4.47	545	581	13	441	1	0	1633	1.091	1.89	22.925	1.217	211	97	314.5	3.76	9.1	38.9	1179	1347	243	8.51
32481		2	64	3	2.04		2	2	2					1	2.4	4.4	364	1433	61.7	191.35	51.99	15.1	38.01	15.508	11.477	7.613	119	4.96	250	383	217	1428	143	5506	579	1.32	1.558	18.693	0.951	322	177	194.1	2.38	48	40.5	862	962	223	10.33
32483	1	1	40	1	0.47		1	2	2		2	1	2	1	1.6	3.1	236	1716	80.93	218.55	74.49	24.9	60.83	13.918	23.193	18.515	205	5.24	85	139	78	564	55	8150	314	0.831	1.012	29.581	1.714	147	53	220.9	0.68	38.1	31.8	311	1211	290	8.53
32485	1	1	24	4	4.67		2	2	2		2			1	2.3	8.3	216	4352	198.68	678.62	427.68	16.6	95.25	30.527	39.427	16.356	341	19.63	2080	2134	93	629	0	0	2538	7.868	9.284	126.822	10.406	3258	2725	718.3	21.22	113.3	91.4	2747	3126	594	70.74
32488	2	2	50	4	5	2	2	2	2					2	1.9	3.3	272	2264	54.35	317.58	124.15	24.6	88.9	21.924	27.977	31.746	144	10.32	123	271	65	1756	8	7235	1811	1.67	2.047	19.931	1.069	444	230	215.2	0.91	40.9	163.9	584	998	221	15.63
32489	1	1	62	2	5		2	2	2					2	1.1	2.4	171	1652	56.92	186.05	77.48	12.6	80.95	25.057	28.917	20.354	111	9.7	429	481	96	559	0	2058	262	1.198	1.941	15.926	1.397	281	110	197.6	3.33	41.9	40.5	959	1285	268	10.05
32490	2	2	22	1	1.81	2	1	2	2		2	1	2	2	1.8	3.3	180	2370	111.65	259.17	100.3	15.5	98.25	30.044	36.583	22.101	308	4.72	221	273	64	580	32	10005	399	1.911	2.005	32.213	1.922	390	269	312.8	4.55	18.5	41	944	1344	226	17.42
32491	1	2	29	2	0.81	2	2	2	2		2	1	2	1	2.5	5.3	306	1531	49.32	198.52	100.87	9.1	34.29	9.478	15.26	4.711	133	6.51	40	523	1702	4928	36	14594	2019	0.972	1.267	16.578	1.161	209	80	173.9	2.54	83.7	122.9	432	770	222	9.36
32494	1	1	37	3	1.95		2	2	2		2	2	1	2	2.3	5.4	285	2042	84.2	231.44	170.34	9.9	90.82	40.786	30.885	10.886	253	3.66	272	397	465	1286	5	200	348	1.265	2.687	13.887	0.901	187	95	309.8	8.7	9.9	53.8	1357	1464	256	14.95
32497	1	2	74	3	1.22		1	2	2					1	1	3.9	225	2059	85.72	289.41	178.57	16	65.35	29.08	23.254	5.112	267	2.93	479	549	23	808	103	0	2847	1.929	2.968	24.723	1.974	433	283	305.7	8.85	54.2	41.7	1150	1435	301	18.75
32503	1	2	29	2	1.75	2	1	2	2		2	1	1	2	3.3	5.6	309	2870	142.11	351.01	109.4	25.2	100.8	32.435	40.454	19.052	659	4.03	495	589	290	1006	38	798	902	2.818	4.032	29.174	2.247	560	255	664.8	9.48	26.1	47.6	1480	2267	481	20.9
32504	1	1	58	4			1	2	2	1				1	2.1	2.2	73	2890	83.88	272.5	58.53	8.3	97.28	37.588	38.926	14.991	171	4.26	154	184	4	346	7	18238	111	1.697	2.057	28.112	1.683	418	185	374	4	19.6	30.4	1067	1271	264	14.09
32506	1	1	25	4	4.83		2	2	2		2	1	2	1	1.5	3	187	1873	38.63	272.62	168.46	7.3	73.65	30.154	20.618	16.149	113	7.88	692	729	18	166	530	0	451	1.264	2.098	15.348	1.889	373	183	137.6	4.4	140.2	27.8	900	887	210	9.76
32509		1	25	2	3.5		1	2	2		2	1	2	2	2.6	6.1	321	1811	55.14	259.26	138.52	4.4	51.31	11.192	21.461	14.942	264	5.17	158	195	5	436	4	0	693	0.862	0.869	18.747	1.063	258	163	212.8	0.92	6.6	62.1	346	673	141	9.06
32513	2	2	22	3	0.3	1	1	2	2		2	1	2	2	2.7	4.9	227	1803	85.97	272.27	94.19	33	44.32	16.214	14.611	9.278	473	3.62	530	912	1391	3648	531	539	1488	1.421	2.571	15.206	2.137	397	24	480.2	4.41	208.1	33.2	1640	2036	461	11.39
32517	1	1	61	4	1.29		2	2	2	2				1	2.2	3.1	284	2540	82.54	276.89	130.26	12.8	123.87	43.374	40.057	31.126	626	7.18	527	555	2	322	10	0	678	1.377	2.103	34.685	3.055	332	136	396.4	16.24	142.6	72.4	1046	1346	206	11.98
32520	1	1	38	3	1		2	2	2		2	1	2	2	1.8	7.9	227	2963	114.3	303.24	107.01	13.9	144.93	55.211	52.777	22.085	637	11.43	483	565	30	656	562	15912	918	2.045	2.72	22.636	1.606	536	264	411.7	6.44	153.8	54.8	1541	1897	281	19.63
32523	1	1	35	3	3.5		2	2	2		2	1	2	2	1.4	2.7	261	4369	100.02	625.87	470.07	10.5	128.63	37.343	48.601	33.551	241	11.8	134	209	73	871	1	13390	334	1.219	4.116	68.605	6.237	307	110	495.5	14.77	29.2	100.9	522	1119	298	15.85
32526	1	2	51	4	3.9	2	2	2	2					1	1.2	3.1	402	1321	48.42	238.94	107.74	22.8	40	16.96	8.126	12.498	15	5.09	48	117	60	665	241	0	2788	3.369	4.51	28.585	2.128	294	0	231.2	0.2	136.6	58.6	549	1120	383	24.24
32530		2	72	4	2.73		2	2	2					1	1.4	4.1	265	822	38.27	139.14	73.51	6.3	14.46	4.85	5.62	2.596	81	4.84	425	433	32	86	1	0	53	0.825	1.303	13.302	2.743	378	314	164.8	7	40.5	11.2	416	582	131	9.3
32531	1	1	55	4	0.08		2	2	2					1	2.7	5.2	269	1152	61.37	98.13	9.47	6.3	34.49	18.005	10.298	2.365	146	1.85	180	431	980	2502	0	0	568	0.844	1.396	19.346	1.365	239	121	287.4	2.62	26.2	39.3	588	708	216	6.08
32540	1	2	60	2	0.55		2	2	2	1				2	1	3.4	147	1048	34.89	162.37	88.76	11.1	30.92	8.94	11.295	7.572	83	4.84	51	509	1378	4833	21	2906	676	0.585	0.632	10.525	1.181	159	35	152.5	1.73	252.9	37.6	214	470	144	6.18
32543	1	2	26	5	5	2	2	2	2		2	2	2	2	1.7	4.5	401	929	17.38	119.92	48.23	6.5	44.92	13.386	14.744	14.148	33	5.29	111	137	13	100	392	0	552	0.561	0.361	10.245	0.831	143	10	66	0.1	107.8	25.7	194	302	146	4.74
32548	1	1	64	2	5		2	2	2					1	1.4	3.7	321	2775	107.86	260.68	108.95	16.5	136.31	36.941	53.074	34.142	981	11.6	777	1302	2001	5259	126	5178	1011	1.316	2.875	26.07	3.216	289	35	762.4	5.75	69.9	102	819	1632	318	12.26
32550	1	1	56	3	3.5		1	2	2					2	2.1	4.4	274	3865	143.56	500.66	303.62	21	148.59	54.692	51.305	34.021	486	13.87	1710	2218	1900	4857	650	4088	2378	3.244	4.657	46.443	3.578	669	336	678.2	9.99	353.2	88.2	2569	2538	553	22.28
32552	2	2	26	3	1.74	2	2	2	2		2	2	2	2	2.3	4.9	457	1925	87.41	207.81	101.82	10.2	82.28	30.098	31.309	15.559	276	2.08	266	313	220	385	52	148	725	1.404	1.749	18.993	0.963	277	158	223.2	4.7	92.6	95.4	701	929	165	15.91
32556	1	2	41	5	5	2	2	2	2		2	1	2	1	1.7	11	471	1175	74.6	77.48	12.28	3.7	35.4	11.004	12.156	7.583	248	3.2	147	196	68	564	0	2135	325	0.669	1.032	23.497	1.377	191	71	306.5	2.23	11.2	47.5	528	877	207	8.82
32560	1	2	23	4	0.73	2	2	2	2		2	2	2	2	1.5	3.4	258	1796	73.11	187.57	85.3	11.3	75.58	29.932	33.312	7.041	186	4.85	787	846	120	647	7	2060	424	1.406	2.594	19.735	2.402	329	167	296.9	7.87	41	57.2	1301	1409	284	17.47
32564	1	1	43	3	4.97		2	2	2		2	2	1	1	3.7	4.8	238	3250	87.71	484.65	338.58	12	113.46	31.132	34.093	39.857	200	5.74	214	239	59	257	1	579	827	1.91	1.664	31.652	1.509	248	146	233.9	2.46	5.6	32.4	1025	1622	288	12.42
32565	1	2	48	3	4.04	2	1	2	2		2	2	2	2	2.3	3.2	241	2299	138.54	277.42	123.36	15.4	71.54	27.711	23.516	14.24	291	6.03	1292	1377	22	878	295	0	1185	2.764	4.124	42.397	3.148	504	323	436.4	7.57	90	106.7	2172	2352	381	25
32566	1	1	43	3	5		1	2	2		2	2	2	2	1.8	3.9	292	2505	116.28	302.38	143.01	15.3	56.61	17.815	20.277	13.041	255	5.19	1026	1154	548	1286	12	0	699	3.011	3.548	55.759	4.1	846	680	391.5	12.01	133.9	47.2	1103	1574	394	39.53
32570	1	1	38	4	5		2	2	2		2	1	2	2	2.8	5.2	231	1677	106.41	162.49	90	5.6	66.8	19.298	24.174	14.779	403	7.78	676	754	306	794	0	0	849	2.689	2.379	25.941	2.692	246	62	332.7	5.99	31.1	98.5	624	1290	361	15.05
32573	1	1	46	4	4.08		2	2	2		2	1	1	2	1.7	1.3	305	2867	160.45	304.64	186.2	9.7	113.16	31.44	46.894	23.77	815	13.74	629	763	9	1592	16	7205	1608	1.468	1.759	50.127	2.641	382	136	803.4	12.12	88.1	225.5	373	2111	276	17.28
32575	1	2	24	4	2.34	2	1	2	2		2	2	2	1	1.7	4.8	288	1013	55.1	105.01	46.48	10.1	44.05	13.2	15.156	11.644	276	7	333	408	26	861	4	0	1651	0.632	1.345	11.415	0.808	191	51	217.3	2.02	57.2	136.3	893	912	205	6.9
32577	1	1	45	4	4.16		2	2	2		1	2	1	1	1.3	2.5	142	1358	94.04	146.35	96.8	14.8	46.26	12.393	17.768	11.48	394	6.47	148	1864	7432	16815	93	6584	1590	0.964	2.152	23.997	1.494	147	0	425.2	1.27	29.4	35.6	597	1209	318	8.61
32581	2	2	83	3	1.56		1	2	2					2	3.6	3.7	326	1158	46.6	188.79	105.07	9.1	25.35	8.548	8.217	6.091	90	9.5	543	692	144	1556	310	4346	2009	1.562	2.117	18.045	3.462	770	602	186.3	10.98	128.6	51.4	1090	915	213	17.49
32583	1	2	28	4	2.98	1	2	2	2		2	1	2	2	4.1	2.8	288	1860	39.47	352.55	229.42	24.6	38.33	10.388	15.176	9.925	41	5.8	340	1478	329	13017	855	2605	14552	1.652	1.647	19.456	2.296	845	182	224	0.5	438.4	867.2	1312	702	432	18.17
32586	1	2	67	5	2.57		2	2	2					2	2.7	4.8	339	1513	65.31	156.58	61.93	16	72.07	32.888	25.297	7.844	200	3.99	241	287	17	454	190	0	674	0.89	0.818	22.219	1.255	287	94	180.4	1.88	135.3	61.5	401	772	221	8.52
32588	1	1	65	5	5		1	2	2					2	0.7	4.2	269	3535	108.79	398.01	148.88	40	111.88	38.675	39.081	22	325	14.58	471	912	1150	4673	46	28985	801	1.97	2.867	22.192	2.595	565	209	344	6.18	205.6	93.4	1801	2039	509	24.62
32591	1	2	52	2	3.87	2	2	2	2					2	2.7	2.5	346	1540	61.12	192.95	65.5	16.1	58.41	14.843	20.438	19.163	156	10.27	732	767	134	347	0	0	1403	1.383	1.301	21.359	1.655	252	54	161.9	3.47	30.9	108.5	511	990	283	13.45
32592	1	1	51	3	3.79		2	2	2					2	1.9	3.4	212	1895	37.58	260.5	106.65	6.4	54	17.93	24.058	8.112	46	4.88	637	667	31	52	1	1	655	2.941	5.402	39.727	3.187	660	451	253	8.98	32.3	23.9	451	892	226	28.27
32596	2	2	29	2	3.12	2	2	2	2		2	1	2	2	1.8	2.2	170	1533	38.32	250.21	152.22	14	45.51	13.054	18.973	10.564	129	2.68	162	169	0	94	3	0	110	1.139	0.733	7.946	0.945	207	56	185.3	1.33	55.1	150.1	316	518	147	6.21
32597		2	44	4	0.94	2	2	2	2		2	1	2	2	1.6	2.7	353	1367	55.02	172.95	41.27	21.4	51.79	16.979	22.455	9.301	94	3.01	69	131	85	684	35	1899	566	1.388	0.995	11.377	1.143	332	100	180.5	1.54	92.7	41.3	631	942	213	10.14
32599	1	2	45	3	2	2	2	2	2		2	1	2	1	2	4.5	286	1039	41.2	156.42	81.09	5.8	28.62	8.737	11.957	5.63	77	1.48	12	38	39	285	19	1657	192	0.782	0.615	15.246	0.636	173	108	112.4	1.18	8.4	30.4	339	440	117	7.77
32600		2	34	2		2	1	2	2		2	1	1	2	1.7	9	399	2546	113.1	339.75	185.53	26.2	85.25	30.505	32.529	14.979	253	6.31	983	1150	287	1491	807	4373	961	2.305	3.837	28.084	2.855	544	243	442.2	9.48	210.6	66.2	1873	2136	420	23.05
32601	1	2	58	2		2	1	2	2					1	2.2	7.6	307	1125	31.81	129.72	20.05	8.6	55.11	20.475	17.066	13.539	82	5.61	250	273	14	222	99	4471	856	0.936	1.514	14.388	0.818	211	84	119.2	1.73	25.7	29.7	337	537	155	7.89
32605	1	1	39	2	1.49		1	2	2		1	2	1	2	1.4	2.9	147	2555	54.66	417.53	261.5	19.6	79.55	23.497	37.677	13.619	125	5.78	77	126	27	529	50	12736	301	0.906	1.302	16.446	1.468	308	86	218.7	3.15	92.9	54.9	429	875	228	13.27
32609	1	1	45	2	0.98		1	2	2		2	1	2	2	1.7	5.8	271	2454	78.88	325.62	155.42	12.7	95.75	37.117	33.245	17.87	158	6.99	283	330	10	581	6	21276	429	1.699	2.424	17.565	1.174	313	176	168.2	3.36	72.2	53.9	1447	1494	194	14.99
32613	1	1	22	3			2	2	2		2	1	2	1	1.3	3.4	327	3037	102.06	362.97	207.85	18.6	136.19	72.095	42.625	10.538	374	5.63	1632	1786	372	1247	821	3198	728	2.378	4.073	24.583	2.593	469	264	271.7	8.76	217.5	32.3	2782	2579	391	22.55
32615	2	2	64	1	0.84		1	2	2					1	1.4	7.4	378	1286	38.86	145.88	63.6	10	63.2	28.477	21.093	9.315	278	3.73	267	308	29	475	49	4023	408	0.688	1.996	8.899	0.663	140	18	196.6	1.11	28.4	30.5	816	983	194	6.34
32616	1	2	24	2	0.19	2	2	2	2		2	1	2	2	1.7	3.5	294	1590	45.19	245.89	138.68	12.2	49.92	16.927	17.717	9.105	90	2.3	715	734	29	231	4	2038	317	1.986	2.684	25.92	2.459	876	789	156.5	8.8	32.7	20.2	1156	1025	247	22.18
32618		2	64	4	2.61		1	2	2					2	2.7	3.2	365	1579	43.93	236.87	141.62	19.2	58.59	27.604	20.117	9.207	54	5.44	306	336	23	249	223	0	333	1.246	1.916	16.128	1.483	351	194	168.8	4.26	165.2	6.7	982	1020	360	27.08
32619	1	1	52	1	3.41		1	2	2					2	2.3	4.1	302	1922	71.51	214.78	47.95	14.5	85.41	26.253	33.244	18.282	566	5.7	235	256	5	206	76	9644	501	1.718	1.991	12.876	0.746	424	184	391.6	3.29	81.2	40	1157	1174	254	15.1
32621	1	1	23	1	1.06		1	2	2		2	1	2	1	3.4	4.6	246	2970	117.33	390.82	201.94	13.8	105.05	35.91	48.318	11.27	297	2.2	114	126	27	128	13	2	137	3.145	2.349	26.874	1.836	413	279	353.8	5.71	274.9	26.6	812	1430	222	16.7
32624	1	2	74	4	1.89		1	2	2					1	2.8	2.7	215	1064	50.01	141.75	70.09	7.4	33.59	10.82	12.152	7.338	306	3.51	142	188	202	255	402	0	1153	0.939	1.378	18.27	0.977	267	84	250.4	1.22	93.3	55.7	378	607	156	9.36
32626	1	2	33	4	3.31	2	2	2	2		2	1	2	2	1.4	5.3	437	1659	61.68	170.78	68.39	7.6	82	27.802	24.709	23.007	122	3.72	90	104	7	177	17	4307	119	1.069	1.483	12.792	0.912	262	116	158.3	3.55	9.8	27.7	1055	1039	240	10.25
32627	1	2	45	4	1.21	2	1	2	2	2	2	1	2	1	1.8	2.9	322	2297	70.39	275.91	152.77	17.4	107.85	34.377	40.052	27.894	146	12.38	502	607	25	905	646	28417	954	1.534	2.331	16.488	1.686	366	104	263.7	3.6	189.4	74.5	1353	1703	441	15.57
32629	2	2	71	3	3.03		1	2	2					2	3.2	4.5	358	703	27.97	84.65	25.14	13.4	30.7	8.167	7.905	11.771	51	2.58	53	160	35	1237	14	0	3235	0.552	0.85	7.341	0.758	206	20	127.7	0.81	112.2	166	283	478	143	5.2
32630	1	1	60	5	1.52		1	2	2					1	2.5	4.2	314	1095	49.74	157.02	23.75	22.3	28.82	7.103	10.63	8.888	79	3.99	7	862	3731	8384	3	32	2946	1.511	1.115	16.41	1.087	296	166	205.1	0.61	26.8	129.3	225	607	182	8.73
32632	1	2	55	3	4.08	2	2	2	2					1	1.9	5.5	257	2230	78.29	155.11	54.14	16.2	150.9	57.733	58.532	21.283	458	7.38	318	425	226	1050	221	4683	1483	2.109	1.923	19.758	1.431	258	30	436.3	3.83	51.7	58.7	467	1338	281	9.68
32636	2	2	41	4	3.08	2	1	2	2		2	1	2	2	2.1	4.6	366	1657	86.82	200.38	87.87	15.8	61.23	14.692	18.295	23.624	85	3.07	362	1036	2945	6641	5	323	595	2.031	1.931	15.467	1.475	343	160	363.6	2.83	37.4	139	1454	1497	326	16.03
32640	2	1	39	3			2	2	2		2	2	2	2	2.1	5.1	240	3321	217.99	287.4	219.24	20.9	150.74	53.891	49.699	34.721	628	14.1	722	920	208	2216	105	4921	1206	1.916	2.107	61.73	3.644	330	30	968.8	15.5	58.9	183.9	869	2446	456	25.06
32641	1	1	50	4	2.3		1	2	2					1	1.5	7.9	178	2317	68.12	235.98	29.68	18.5	73.15	26.197	27.643	12.721	122	4.85	135	174	42	445	1	7759	344	1.503	1.802	24.001	1.822	410	140	350.6	3.13	12.9	45.2	1101	1394	444	13.9
32644		1	84	1	0.93		1	2	2					1	2.7	1.5	108	1295	40.78	198.54	109.43	3.3	39.97	15.392	10.813	5.83	83	3.69	466	504	30	239	392	884	514	1.403	2.092	14.379	1.622	338	181	159.7	6.02	124.2	15.7	1009	764	149	16.04
32649	1	2	26	5	4.97	1	2	2	2		2	1	2	2	2.4	5.6	279	2972	103.48	277.34	143.05	10	162.34	54.61	48.364	47.571	369	11.65	501	802	19	3586	26	9	3418	1.239	2.219	24.65	1.409	369	158	320.1	3.29	23	304.9	1315	1501	219	12.88
32650	1	1	31	4	4.17		2	2	2		2	2	1	2	2.3	5.9	380	1995	58.54	288.29	174.82	9.3	70.99	20.367	32.773	12.923	168	5.33	84	139	20	634	39	12544	190	1.057	0.927	15.564	1.183	177	61	228.4	4.57	27.2	37.4	410	975	152	9.24
32651	1	2	39	2	0.82	2	1	2	2		2	1	2	2	1.6	3.7	279	1658	55.34	240.97	136.56	9.6	55.01	15.882	20.91	10.406	128	7.73	108	189	255	876	1	0	296	0.809	1.057	18.912	1.035	218	104	189.8	2.06	58.8	120.2	684	973	296	10.43
32653	1	1	20	2	0.7		1	2	2		2	1	2	1	1.5	4.5	294	2731	124.38	330.61	184.23	18.4	101.92	25.122	34.72	35.003	280	15.01	763	792	22	339	25	0	492	2.148	3.795	48.025	5.231	957	689	346.9	13.3	149.5	135.3	1237	1701	407	34.11
32656	2	2	20	4	1.87	2	2	2	2		2	1	2	2	2	3.1	436	2076	80.57	216.97	69.28	16.5	93.5	32.938	37.975	17.465	199	4.46	927	987	42	639	33	2258	285	2.248	1.747	26.814	2.831	344	245	231.3	6.73	72.7	78	832	1048	243	22.41
32663	2	2	40	2	1.47	2	1	2	2		2	1	2	1	2.6	4.6	317	2350	54.56	325.37	218.86	7.9	96.19	36.656	34.62	16.074	150	5.57	99	108	5	89	51	0	174	0.567	1.185	14.428	1.458	184	58	175.5	4.17	102.9	45.3	499	908	153	11.52
32666	2	1	85	3	1.89		1	2	2					2	1.6	4.9	266	1107	21.34	171.45	99.71	7.6	40.42	8.028	16.633	12.565	207	4.12	63	87	0	242	91	0	313	0.798	1.276	8.219	0.314	178	86	151.4	0.93	8.2	21.7	145	685	101	6.7
32668	1	2	34	2	3.47	2	2	2	2		2	2	1	1	2.5	8	327	2980	55.39	261.81	74.97	10.1	90.48	28.759	26.278	25.616	83	11.97	100	112	2	141	11	4183	118	1.421	2.592	32.386	3.046	492	63	528.5	2.76	39.6	50.8	777	1405	422	8.68
32671	1	2	29	5	2.69	2	2	2	2		2	1	2	1	2.9	6.8	293	3584	183.32	250.71	169.91	9.1	208.84	117.699	62.485	11.28	631	9.33	2042	2143	163	1163	9	926	330	1.096	3.842	19.814	2.01	310	109	355.9	7.8	62.8	95.1	4691	3817	503	13.6
32674	1	2	26	5	1.57	2	2	2	2		2	1	2	2	2.3	4.3	354	1765	70.59	191.57	47.22	9.3	79.69	23.421	29.994	19.558	235	4.06	255	273	23	253	5	3021	262	1.457	2.17	29.605	1.865	389	257	263	5.59	16.8	33.2	836	1089	320	14.1
32677	2	2	53	4	3.12	2	1	2	2					2	1.4	5.3	303	1810	68.16	184.53	58.59	11.4	90.6	33.654	28.589	21.55	558	6.19	540	1011	1835	4717	13	2936	980	1.014	1.974	13.008	1.199	275	123	366.1	3.19	32.3	64.2	756	1107	200	11.71
32680	1	1	33	5	5		2	2	2		2	1	2	1	2.1	4.4	269	3305	164.35	340.27	17.93	30.3	142.85	43.707	52.801	25.28	767	11.11	427	444	1	204	11	3273	507	2.762	3.464	38.241	2.459	521	233	613.1	6.08	9.3	67	1330	2334	501	28.9
32681	1	2	67	5	0.98		1	2	2					2	2.6	4.6	287	1952	66.86	303.89	136.69	35.9	59.11	14.139	24.574	15.376	473	10.92	379	877	1978	4903	166	3165	1408	1.629	2.529	12.907	1.433	519	135	462	3.97	113.6	103.8	1098	1089	406	18.14
32684	2	2	67	3	1.53		2	2	2					1	1.8	4.5	295	1752	46.53	215.42	107.83	11.6	82.62	30.347	31.739	14.644	143	5.45	222	244	14	151	153	1	202	1.048	1.281	15.059	1.022	302	149	176.5	1.91	123.7	179.2	652	764	240	10.31
32687	2	2	74	1	1		1	2	2					2	2.4	2.9	202	1361	77.99	176.97	46.47	12.2	37.35	16.512	12.564	4.525	208	4.17	253	331	97	906	5	25236	836	1.67	1.536	15.134	1.039	283	166	226	3.75	38.2	27.3	741	1127	217	10.76
32688		2	63	2	1.49		1	2	2					1	3.3	2.9	288	1461	61.93	216.32	171.14	1.2	38.93	13.612	16.649	4.661	281	1.25	87	88	0	16	4	0	156	0.391	0.663	7.506	0.336	77	45	250.9	2.25	0.3	4.4	189	354	61	6.64
32689	1	2	31	2	0.78	2	1	2	2		2	1	2	1	3	6.5	251	2302	82.71	257.93	171.06	4.6	53.97	25.404	18.769	6.715	191	1.13	157	170	7	134	2	127	88	0.94	1.444	22.201	1.728	231	58	370.3	6.13	46.6	21.6	976	1165	236	11.21
32690	1	2	56	5	5	2	2	2	2					2	1.7	3.6	356	2186	98.18	273.62	115.29	25.5	79.34	21.895	23.693	25.925	145	21.7	745	1674	2290	9818	302	14078	8384	2.376	2.702	33.827	2.391	789	243	340.7	5.02	281.5	425.5	1678	1837	461	20.93
32691	1	1	43	3	2.18		1	2	2		2	1	1	1	2.6	3.4	243	3503	159.63	277.83	116.81	11.6	152.35	42.941	53.018	42.595	1102	9.76	553	728	578	1565	501	3008	1106	1.463	2.357	38.641	3.534	447	63	956.5	8.72	169	151.5	899	2185	464	17.12
32693	1	2	21	4	0.79	2	1	2	2		2	1	2	1	3	2.6	254	2036	68.5	287.83	142.19	14.3	69.27	21.568	30.211	13.795	146	5.19	57	76	1	213	15	9566	96	1.203	1.597	23.251	1.1	261	127	160.3	1.53	16.8	33.2	759	1141	255	9.48
32696	2	1	69	4	3.46		2	2	2	2				1	2.2	7.5	458	1934	94.48	218.25	122.73	17.1	80.04	29.71	28.665	16.189	291	4.84	486	594	318	1039	162	3118	281	2.114	2.031	22.636	2.174	217	54	359.2	3.5	78.9	79.7	881	1373	309	14.01
32697	1	1	67	3	4.8		2	2	2					1	1.7	7.2	338	992	44.34	140.47	61.52	6.8	28.26	11.16	9.866	4.196	103	1.35	328	367	11	372	185	0	922	1.693	1.375	16.665	1.21	497	348	137.6	2.64	90.8	9.2	609	573	174	13.9
32703	1	1	71	5	3.64		1	2	2					1	1.7	2.6	165	1804	81.14	267.62	123.49	26.5	49.04	18.336	13.615	10.011	136	7.07	551	1171	2678	5917	382	0	2254	1.771	2.481	28.767	2.173	564	361	265.3	6.27	194.9	126	1368	1459	326	16.81
32704	1	2	33	3	3.1	1	2	2	2		2	1	2	1	1.3	8.1	324	1455	46.22	221.22	46.34	16.9	42.49	17.992	14.097	9.068	64	6.85	108	168	77	672	5	12515	290	1.587	1.07	21.337	0.732	381	298	114.5	1.46	5.7	41	393	535	210	12.5
32706	1	1	43	2	0.6		1	2	2		2	2	1	1	2.5	4.1	315	4499	134.6	601.07	260.09	19.4	114.5	36.085	33.732	32.847	696	9.81	357	386	13	284	31	7054	570	2.152	3.678	43.771	3.243	594	198	703.2	5.1	21.1	53.2	1470	2414	489	19.34
32708	2	2	53	3	5	2	1	2	2	2				2	1.7	2.5	248	1458	82.99	194.7	80.79	12.2	39.23	14.596	11.823	7.968	128	2.96	124	223	164	1095	10	4215	666	1.506	1.24	34.582	1.136	322	153	153.4	7.25	27.6	84	564	806	203	13.06
32709	1	2	47	4	1.25	2	1	2	2		2	2	2	2	1.7	5.4	298	1750	67.77	203.29	76.7	13.5	76.73	32.05	27.97	10.354	188	3.43	881	942	42	391	577	4440	530	1.951	2.375	20.525	1.715	395	245	218.6	3.6	129.7	34.2	1712	1245	263	19.46
32710	1	2	82	3	1.25									2	1.4	4.3	307	1653	56.38	233.17	109.43	11.1	58.18	21.871	17.922	13.391	284	4.48	296	363	69	541	437	868	767	1.117	1.584	21.182	1.331	243	67	263.6	3.44	113.8	67.7	862	788	223	10.44
32711	1	2	60	1	0		1	2	2					2	1.8	2.7	252	1486	63.22	192.97	80.18	19.2	56.1	19.982	19.105	13.042	316	6.74	213	260	50	541	9	13564	626	0.938	1.849	12.958	1.502	266	62	284.6	1.71	96.1	64.1	810	1013	254	12.43
32712	2	2	27	3	0.26	1	2	2	2		2	2	1	2	1.8	3.2	155	2935	94.28	459.3	201.58	11.7	80.48	23.951	27.688	19.257	211	6.42	164	211	26	173	739	0	713	2.456	1.464	34.777	2.08	610	417	263	2.05	223.1	34	643	1162	299	20.11
32713	2	2	45	5	4.42	2	1	2	2		2	2	1	2	1.2	7.1	343	2513	65.4	430.13	204.86	19.5	63.43	20.291	20.083	16.357	125	7.44	510	1538	3855	10417	0	37	929	1.74	2.164	19.804	2.557	473	199	239.6	1.92	292.4	122.8	1358	1375	392	15.54
32714	1	2	26	5	2.76	2	2	2	2		2	2	2	1	2.9	3.8	303	2750	78.49	353.84	134.59	28.6	104.99	49.814	34.553	14.18	228	9.12	930	1387	98	5452	82	10692	935	2.113	3.301	29.515	2.87	889	415	351	7.7	163.7	145.8	1494	1865	588	16.25
32716	1	2	66	2	1.37		1	2	2					2	2.1	4.4	330	1557	39.02	252.34	77.42	19.1	44.73	10.001	17.794	13.434	53	6.04	82	108	14	237	152	6144	213	1.769	1.409	13.66	1.194	426	239	147.5	1.37	88.3	31.7	431	771	174	11.76
32717	2	2	42	2	1.13	2	1	2	2		2	1	1	2	2	4.7	336	2574	100.08	301.42	155.39	17.3	109.78	31.834	43.704	26.349	370	5.74	428	507	139	871	9	5923	363	2.114	2.438	25.653	1.884	232	101	378.6	3.5	26.6	48.4	976	1637	310	12.13
32722	1	1	28	1	2.07		1	2	2		2	1	2	2	1.6	4.8	199	1139	63.44	127.25	82.36	11.5	43.04	7.904	15.406	16.99	223	6.24	146	285	493	1394	34	2213	644	0.755	1.044	11.39	0.931	98	16	250.9	8.81	31	74.7	383	1112	334	6.8
32724	1	1	23	5	5		2	2	2		2	1	2	1	2.9	3.9	228	3452	125.26	309.69	136.73	11.3	132.41	53.073	52.977	15.567	633	4.26	761	785	7	287	8	3426	635	1.737	3.589	32.942	2.629	732	399	693.6	11.24	11.3	33.7	1765	2118	404	25.83
32727	1	1	65	2	1.69		2	2	2					2	1.3	4.8	192	2443	88.09	187.19	90.52	9.6	99.59	25.169	32.557	33.723	437	8.3	293	413	492	1182	8	0	244	1.091	1.248	15.117	1.571	227	32	452.5	6.27	72	138.6	638	2001	249	9.7
32729		2	85	3	1.84		1	2	2					2	1.2	5.9	282	1278	37.26	189.49	100.88	9.7	43.42	15.165	15.154	9.99	75	3.37	664	766	341	902	262	894	613	1.405	1.748	18.176	1.342	472	240	124.9	2.91	132.6	48.1	632	699	183	12.35
32731	2	1	31	4	3.72		2	2	2		2	1	2	2	2.2	2.9	235	3366	142.26	486.74	218.43	38.2	95.8	26.19	38.894	21.378	1065	11.22	727	752	0	295	35	0	717	1.865	2.417	23.406	1.988	705	212	765	3.64	21.5	70.2	1006	1792	553	30.27
32732	1	2	61	5	5		1	2	2					1	1.8	4.3	264	1857	92.96	190.75	62.85	18.3	59.15	19.428	22.487	10.765	235	5.6	174	330	61	1723	272	4457	3196	1.628	1.963	35.837	1.994	280	67	325.8	3.29	35.6	111.3	624	1257	282	9.96
32733	1	2	40	5	5	2	2	2	2		2	1	2	1	1.8	3	391	2154	82.63	243.97	56.52	20.7	87.67	40.908	30.931	9.945	168	7.85	791	1059	597	2836	192	4374	914	2.092	2.634	19.704	2.998	824	606	163.2	8.55	87.3	82.6	1655	1602	362	13.98
32734	1	1	22	3	0.68		1	2	2		2	1	2	1	1.8	3.6	215	3650	177.86	536.6	356.98	23.1	92.69	30.791	35.597	12.162	380	8.56	24	45	4	246	3	6330	314	1.369	1.544	44.289	3.662	215	53	649.2	8.13	35.8	55.6	613	2055	447	20.6
32738	1	1	20	2	2.25		2	2	2		2	2	2	1	3.7	4.5	271	5438	111.24	536.29	137.67	41.9	71.35	27.417	25.957	12.032	155	5.49	317	410	42	616	936	14598	857	2.576	2.981	47.534	4.099	851	270	775.1	2.86	239.6	34.8	1951	1898	649	22.27
32742	1	1	55	3	2		2	2	2					1	1.7	14.4	234	1266	50.31	105.21	36.49	11.8	58.03	15.493	20.802	16.84	106	5.11	407	590	1	2195	0	0	2403	1.836	2.951	21.725	2.189	468	283	271.4	7.75	18.2	187.7	426	878	263	24.16
32745	2	2	43	3	2.04	2	1	2	2		2	1	1	1	2.2	3.8	442	1458	44.81	227.66	172.23	4.3	42.61	8.88	12.77	17.888	133	3.56	9	11	0	4	2	0	63	0.44	0.742	12.373	0.946	102	55	230.1	1.97	13.5	74.4	115	643	71	7.56
32749	2	2	58	4	2.49	2	2	2	2					1	2.6	4.7	225	1273	42.33	154.37	36.86	7.8	53.96	17.519	15.176	16.589	95	2.46	173	181	0	97	7	0	207	1.308	2.525	11.911	0.499	261	159	143.4	0.8	0.8	27.2	477	702	182	6.13
32751		2	24	3	1.6	1	2	2	2		2	1	1	2	1.7	8.5	405	3392	77.51	588.71	212.49	28	86.48	34.425	25.793	18.729	211	9.47	640	951	918	3020	529	0	1683	3.643	3.896	36.617	2.226	883	474	292.8	4.64	200.3	123.9	1660	1670	423	36.05
32755	1	1	31	3	2.93		2	2	2		2	1	1	1	3.7	8.5	306	4325	164.58	431.75	192.27	15.8	130.47	53.8	44.142	19.598	436	7.12	1024	1058	14	302	12	3760	480	5.556	5.592	69.733	6.521	598	418	522.3	13.32	163.6	36.3	1602	2769	365	25.37
32756	1	1	69	3	3.35		2	2	2					1	0.8	4	320	2545	77.65	324.78	182.52	13	104.28	37.11	34.293	24.204	214	5.01	238	264	59	310	1	1029	532	1.731	3.005	24.16	1.659	332	178	263.1	5.09	25.6	33.2	1092	1575	241	15.96
32759	1	2	38	5	3.31	2	1	2	2		2	1	2	2	2.1	3.7	322	2276	91.25	303.51	154.02	19.4	83.99	25.173	33.064	19.445	307	9.92	706	833	82	1230	507	3924	2564	1.941	2.504	30.751	2.12	597	236	344.4	4.32	235.4	90.4	1799	1744	433	18.31
32761	2	1	85	5	4.7		1	2	2					1	1.3	5.2	243	1517	71.18	161.5	81.99	8.3	66.64	23.827	23.491	12.837	619	3.68	5046	5212	645	1626	99	79	915	1.167	3.649	22.517	1.703	671	29	539	27.84	93.1	27.6	325	975	164	22.27
32767	1	1	36	3	3.34		2	2	2		2	2	1	1	1.7	2.3	230	6955	263.41	722.12	228.16	42.2	272.03	100.78	100.74	44.394	620	17.83	463	583	30	1385	39	34101	1119	4.513	5.095	58.927	3.414	1034	559	642.9	14.18	127.6	134.2	2824	3615	572	53.77
32768	2	2	28	3	1.78	2	2	2	2		2	2	2	2	2.3	4.4	300	1356	111.52	164.68	78.4	9.2	27.88	9.803	9.895	4.29	198	2.73	702	746	34	260	523	0	719	1.68	3.079	31.55	2.811	440	226	457	8.74	174.8	24.3	1534	1523	259	16.52
32775	1	1	69	1	2.04		1	2	2					1	2.5	1.4	273	1894	134.37	159.04	78.4	8	78.67	31.07	24.578	15.036	880	5.31	359	829	111	5557	31	0	9243	0.803	1.975	14.684	1.327	269	46	545	2.76	57.5	524.6	1159	1322	220	15.31
32779	1	1	39	4	4.13		2	2	2		2	1	1	1	1.9	2.8	338	2962	101.26	342.38	201.62	11.4	115.41	35.747	42.12	30.062	680	5.59	304	344	5	385	39	3695	559	2.144	2.302	28.998	2.367	239	101	513.6	5.8	203.7	72.8	591	1274	231	12.95
32781	2	2	26	4	1.01	2	1	2	2		2	2	1	2	2.9	6.6	291	2586	77.03	281.89	95.2	13.9	132.19	40.179	55.009	24.076	532	10.21	492	514	1	254	13	1290	445	1.497	2.235	24.274	1.102	363	233	379.5	4.11	28.6	51.7	662	1184	275	38.03
32789	2	2	27	5	2.73	1	2	2	2		2	1	2	2	2.4	6.6	253	1546	30.95	252.67	74.85	14.3	45.84	8.122	17.679	16.81	130	2.76	255	258	0	48	1	0	55	1.095	0.702	14.829	1.085	372	291	113.5	0.74	229.6	33.7	632	588	172	9.39
32791	1	2	28	5	2.74	3	2	2	2		2	2	1	2	4.6	4.5	341	3626	208.53	375.25	119.84	63.7	156.35	40.824	50.087	54.433	288	5.4	837	866	0	366	4	0	1836	3.579	6.097	35.256	3.526	1210	493	695	15.69	44.6	195.2	2328	4582	1322	59.03
32794	1	2	26	2	0.6	1	2	2	2		2	1	1	1	1.7	6.3	398	3338	94.96	413.14	219.36	30.3	152.57	55.652	61.213	22.45	274	15.6	1051	1130	51	702	63	16096	709	3.004	3.906	38.686	3.373	757	480	353.3	11.49	52.3	49.3	1739	1949	508	35.98
32799	1	1	31	5	5		1	2	2		2	2	2	1	3.3	4.2	424	2032	77.55	213.6	90.18	11.6	98.52	36.38	38.927	12.26	264	5.15	477	633	362	1681	35	14612	822	1.624	1.932	23.048	2.399	239	81	326.3	7.17	96.7	52.7	668	1054	212	12.81
32802	1	2	34	5	5	2	2	2	2		2	1	2	1	1.9	4.3	491	2254	114.33	160.71	52.18	9.2	106.34	42.268	37.571	14.644	716	6.36	717	761	70	449	140	1864	995	1.61	2.95	22.31	1.833	302	88	591.8	8.44	23.5	63.4	1441	2093	293	13.51
32804	1	1	80	2	1.13		2	2	2					1	1.6	4.9	220	1527	105.02	171.89	80.57	11.6	45.65	12.831	14.833	13.67	131	4.72	242	659	1541	4098	275	1312	714	1.12	2.25	22.499	1.452	254	83	337.9	7	72.5	61.6	981	1192	261	14.64
32808	2	2	76	4	1.22		2	2	2					2	2.4	9.9	408	513	26.45	48.02	15.44	5	24.16	10.767	8.035	3.36	82	1.58	118	143	20	292	0	515	388	0.727	0.758	8.306	0.557	70	12	96.5	0.49	13	21.3	414	349	140	2.73
32812	1	2	49	2	2.4	2	1	2	2		2	1	2	1	2.5	6.7	271	4087	97.63	439.56	238.68	19.6	87.35	24.036	29.328	25.276	329	7.12	156	198	29	476	25	5964	858	1.347	1.407	25.459	1.506	476	149	390.1	4.14	9.2	90.1	606	1039	279	17.91
32813	2	2	41	2	0.51	2	1	2	2		2	1	2	1	2.8	5.8	357	2905	120.91	362.58	175.71	16	109.41	39.771	44.507	13.93	1920	8.69	410	600	687	1957	4	6546	170	2.097	3.048	27.442	1.252	416	289	632.9	11.57	22.6	46.1	1737	2011	325	19.48
32817	1	2	66	5	5		1	2	2					1	1.2	3	349	2048	73.69	252.58	150.66	19.4	88.17	29.274	30.323	23.156	298	12.77	685	888	64	2411	3	1847	2651	1.33	2.625	12.925	1.963	421	23	394.9	11.19	171.8	353.1	1497	1594	363	7.84
32819		1	26	4			1	2	2		2	1	2	1	2.1	6.8	488	2815	106.66	335.31	171.3	35.9	123.15	35.703	48.336	28.65	992	12.59	711	887	410	1739	358	15611	1907	1.845	3.108	20.45	2.082	577	138	708	6.04	251.9	122.4	1542	1948	429	21.87
32821	2	2	60	5	4.55		1	2	2					2	2.3	5.1	311	1026	40.49	137.57	51.24	13.5	36.91	8.425	13.221	12.398	147	4.12	104	359	913	2613	16	0	1303	0.732	0.757	9.621	0.649	160	70	142.7	3.75	47.2	75.1	503	630	146	7.86
32825	1	1	37	4	3.79		1	2	2		2	1	2	1	3.3	4	299	4317	156.45	389.33	81.98	15.6	135.24	54.717	44.974	23.975	327	13.06	407	528	89	1349	92	23434	1420	2.941	3.544	56.234	3.717	808	343	676.1	8.78	214	116.3	1984	2499	493	26.42
32829	1	1	21	4	2.09		2	2	2		2	2	1	1	1	6.2	430	3451	82.41	466.14	295.71	8.5	129.77	40.284	54.685	24.857	246	6.45	180	199	0	229	1	9875	81	1.443	1.679	26.039	1	271	136	260.7	2.93	11.2	48.7	933	1892	226	14.15
32832	2	2	75	3	2.65		1	2	2					1	1.6	4.9	316	1077	43.33	116.32	43.07	4.1	48.92	21.946	16.776	4.869	907	2.93	553	559	0	64	21	0	746	1.041	2.181	6.85	0.395	319	151	513.8	2.72	7.3	4.7	415	640	103	10.52
32833	1	2	30	4	1.9	2	1	2	2		2	2	2	1	2.1	1.6	239	2348	87.51	274.05	139.95	9.3	102.79	39.187	40.855	11.34	348	4.25	270	452	7	1984	505	29323	213	1.304	2.257	20.002	1.342	238	113	332.5	6.39	79.4	34.9	970	1629	256	12.53
32835	1	1	33	4	1.16		1	2	2		2	1	2	2	2.3	4.4	268	2078	65.71	329.95	119.52	14.1	57.71	20.476	18.164	13.543	83	6.39	418	728	710	2866	697	13386	1687	2.933	2.74	31.883	2.354	768	400	154.4	5.59	285.9	31.3	1487	1144	271	23.4
32836	1	2	39	4		2	2	2	2		2	2	2	2	1.6	3.5	292	1814	85.16	221.31	106.83	13.5	67.2	25.537	19.75	12.801	216	3.24	275	350	52	815	65	783	1020	2.194	1.748	24.744	1.482	291	109	293.2	4.9	38.1	56.3	439	1000	241	9.87
32837	1	1	33	4	2.8		2	2	2		2	2	1	2	2.6	5.4	226	2452	71.41	354.44	182.77	14	84.64	27.913	32.018	17.289	216	1.73	687	758	15	861	25	0	375	2.563	3.414	35.796	3.929	457	304	297.3	8.04	155.1	30.1	964	1502	265	23.18
32838	1	1	22	3	1.81		1	2	2		2	1	2	1	2.5	4.5	204	1325	57.68	205.81	95.89	12	32.42	10.399	13.433	5.694	126	1.74	57	422	1373	3552	238	3218	805	1.267	1.074	15.979	1.016	260	151	187.7	2.36	52.1	16.7	392	707	134	11.08
32842	1	2	53	5	5	2	1	2	2					1	1.6	6.4	254	2287	101.05	262.18	135.5	15.6	80.25	25.179	28.001	19.933	225	8.56	256	591	109	3621	712	1827	4074	1.652	2.014	28.699	2.034	557	213	345.9	3.33	189.2	262.1	880	1194	345	15.78
32849		2	28	4	1.5	2	2	2	2		2	2	2	2	2.2	3.6	400	1837	58.13	306.86	178.99	9.7	44.65	15.343	16.633	9.917	122	3.89	622	638	6	155	4	81	320	1.968	2.851	21.403	1.39	427	307	235.1	6.57	25.8	24.8	1514	1324	236	14.47
32855	1	2	85	2	0.73		2	2	2					2	1.6	2.7	217	1657	65.35	204.14	99.75	15.5	67.95	26.972	24.513	10.868	172	8.11	439	1400	121	11303	362	515	20722	1.191	2.1	12.24	1.371	368	82	260.5	4.66	108.7	911.8	1575	1433	283	10.97
32857	1	2	42	3	1.34	2	2	2	2		2	2	1	1	2.6	3.7	287	1299	38.54	206.09	151.62	8.8	19.91	9.126	5.948	2.575	96	1.26	73	89	15	178	1	3659	55	0.31	0.668	2.864	0.562	40	0	129.3	1.08	188.2	8.8	570	682	144	4.89
32858	1	2	71	3	0.86		2	2	2					1	2.7	4.4	319	2326	78.25	292.5	136.44	14.2	99.42	46.734	32.333	11.21	254	5.93	900	964	97	456	14	315	913	2.822	3.605	34.317	4.339	548	386	268.6	10.63	120.7	29.5	1442	1613	305	26.61
32859	1	2	65	4	1		2	2	2					1	1.9	4.6	266	1286	35.7	212.47	107.89	12	35.14	13.351	13.178	6.026	27	2.37	158	206	130	428	172	3218	525	0.9	1.224	17.426	0.775	306	175	125.1	2.31	98.2	52	585	667	201	11.47
32868	1	2	41	3	0	2	2	2	2	1	2	1	1	1	2.6	6.6	428	1999	68.19	205.67	95.16	9.8	67.98	24.701	24.006	13.4	169	5.53	183	896	2885	7108	1	0	1370	1.034	1.368	23.103	1.689	380	122	382.5	3.65	56.4	141.8	406	940	235	10.45
32870	1	2	25	3	1.55	1	2	2	2		2	1	2	1	1.2	5	241	2846	120.69	274.96	95.49	13.2	141.83	58.271	44.073	28.161	333	7.94	875	911	0	460	3	18129	264	2.463	3.617	22.665	1.449	648	511	313.2	11.14	23.5	58.6	2395	2382	339	23.33
32880	2	2	62	2	2.02		1	2	2					1	1.3	2.3	380	1966	92.59	234.08	94.81	13	74.23	16.595	33.403	17.779	512	6.59	293	705	163	4838	28	688	705	1.49	1.707	30.838	1.911	326	172	405	2.12	37.4	70.5	436	1221	212	14.64
32881	2	2	23	2	2.89	1	2	2	2		2	1	2	2	2	9.4	220	2901	120.62	335.63	133.39	26.6	120.33	50.219	39.005	21.76	536	9.98	806	928	40	1437	70	18493	908	1.717	2.739	27.48	2.759	538	324	384.7	7.28	176.4	122.8	2086	2459	415	19.22
32885	1	2	48	4	3.57	2	2	2	2		2	2	1	1	1.5	3.4	243	3286	108.31	296.04	108.87	29.3	158.79	47.647	63.352	39.916	319	16.52	489	511	2	271	18	613	218	1.612	2.341	27.752	1.652	517	159	377.7	2.08	11	40.5	1059	1900	509	26.02
32889	2	2	27	1	5	2	2	2	2					2	2.6	6.2	250	1934	91.81	209.2	100.05	10.8	82.69	27.514	26.046	19.806	223	8.03	932	1030	110	1045	100	2341	541	1.34	2.771	23.375	1.967	333	169	321.3	6.12	41.1	115	1451	1573	273	11.91
32891	1	1	59	2	5		1	2	2					2	1.8	3.1	263	2011	99.61	100.33	53.54	8.8	103.53	26.035	50.095	19.609	632	9.94	279	407	271	1376	25	4009	1794	0.864	1.27	29.039	1.58	188	41	422.8	2.51	43.4	72.4	560	1181	327	9.61
32892	1	1	34	4	2.93		2	2	2		2	1	2	1	2.8	10.4	230	2914	60.39	356.74	76.52	16.3	32.11	11.254	9.062	8.912	66	36.2	1034	1084	66	593	0	11701	102	4.519	6.053	76.987	6.718	1336	1029	507	15.89	38.3	43.1	900	1315	453	45.7
32897	2	2	54	3	2.02	2	1	2	2					1	2.2	4.6	262	1806	92.22	205.79	103.64	7.5	69.23	22.556	25.758	14.998	416	5.58	219	251	5	376	11	22384	378	1.051	1.781	28.409	1.19	299	140	267.3	2.18	10.7	38.9	776	1101	247	11.17
32900	2	1	30	4	0.41		1	2	2		2	1	2	2	2.5	3	311	2748	51.59	506.75	220.58	28.3	60.99	11.451	21.68	23.548	43	7.91	80	153	6	884	12	10550	1273	2.581	1.526	17.603	1.5	802	418	195.5	0.13	254.6	388.9	511	879	338	19.19
32901	2	1	24	5	2.33		1	2	2		2	1	2	2	1.5	2.8	312	2808	109.99	433.68	293.66	7.4	70.05	20.148	24.796	17.976	413	5.01	313	411	79	1108	27	1	1925	1.117	1.769	27.388	1.873	273	134	349.7	3.52	93.3	156.7	708	1328	217	12.55
32904	1	2	29	5	2.33	2					2			2	2.4	2.3	333	1317	24.81	229.73	116.58	10.7	37.06	10.581	19.866	5.347	30	3.64	246	295	4	441	272	3	413	1.057	0.783	14.692	0.934	130	71	82.7	1.27	17.3	27.6	178	416	107	9.66
32908	2	2	62	3	0.93		2	2	2					1	2.2	6.9	199	2168	95.33	307.67	85.3	22.8	63.85	17.514	22.919	17.979	163	10.25	1041	1232	177	2057	264	8277	1974	3.207	2.38	38.168	2.589	763	463	280.3	2.7	176.3	219.5	901	1309	312	26.26
32910	1	1	39	3	3.25		2	2	2		2	1	2	2	1.7	5.2	183	2382	87.72	235.72	50.4	17.4	125.14	46.651	50.287	17.126	633	8.38	617	817	69	2369	40	19820	2957	2.597	2.683	20.111	1.254	604	341	431.4	2.28	44.4	178.1	1013	1532	411	25.61
32915	2	2	20	3	0.44	1	1	2	2		2	1	2	2	1.7	9.5	301	733	44.6	104.88	34.52	9.7	15	3.593	5.908	3.836	107	1.69	70	113	40	301	427	0	475	0.739	0.389	12.168	0.761	245	120	129.8	0.29	195.8	9.2	383	340	131	4.51
32916	1	2	29	4	3.73	1	2	2	2		2	2	2	1	2	8.9	251	2838	94.93	405.85	188.1	27.4	96.17	28.595	37.265	20.199	201	16.62	354	509	98	1464	737	31836	1071	2.119	2.455	31.94	2.31	557	217	361.6	3.98	214.7	154.1	1317	1613	501	21.41
32917	2	2	49	5	3.97	2	2	2	2		2	1	1	2	2	2.2	354	1264	37.16	148.77	58.79	8.5	60.53	11.149	18.853	16.167	77	7.39	54	116	96	669	34	2457	293	0.251	0.508	7.966	0.6	131	22	95.7	0.73	13.9	85.6	334	461	237	5.76
32918	1	2	64	2			2	2	2					1	2.6	9.3	360	2102	151.55	131.4	80.69	13	107.35	26.818	47.144	19.947	342	22.53	898	956	403	460	60	478	1153	1.52	2.886	51.595	3.415	370	15	456.6	8.49	52.6	332.4	968	2131	586	26.86
32919	1	1	31	2	5		2	2	2		2	1	2	1	1.5	2.5	298	3799	175.08	326.56	120.39	37	192.9	53.511	60.641	64.378	517	18.44	448	1114	2722	6618	23	2859	3091	2.231	2.758	49.567	4.749	371	60	694.6	9.95	61.4	194.7	769	2216	519	20.26
32921	1	1	23	2	0.45		1	2	2		2	1	2	1	2	5.4	359	2854	127.89	332.63	146.27	13.3	92.51	24.309	37.504	18.61	447	9.1	96	622	1969	5321	14	6447	1605	1.273	1.355	47.913	2.998	347	154	500.1	4.51	59.3	118.2	566	1536	377	15.38
32922	1	2	31	5	1.45	2	2	2	2		2	1	2	1	1.4	4	355	2861	133.09	180.94	69.13	12.3	178.6	51.212	66.494	48.521	422	15.26	543	642	93	1153	1	2171	720	1.65	2.744	31.426	3.273	303	95	520.3	8.65	53.4	174.7	873	1680	314	12.83
32924	2	1	53	1	2.09		2	2	2					1	1	8.3	176	1173	29.73	223.63	126.94	26.3	25.91	6.207	9.143	6.924	420	4.68	248	305	101	410	439	0	888	0.745	1.281	8.205	1.989	230	15	298.3	1.1	142	32	335	531	233	8.11
32925	1	1	43	2	0.71		1	2	2		2	1	2	1	2.4	7.7	312	2844	90.19	302.07	37.58	25.9	99.98	37.498	32.049	22.684	125	7.41	132	163	0	367	1	20830	97	1.802	2.141	22.944	1.688	505	145	313.5	2.48	20.9	58.1	1326	1880	432	15.62
32926	1	1	70	5	5		2	2	2					1	3.2	4.3	347	2417	76.62	195.07	93.93	12.2	115.48	36.565	46.479	21.752	304	5.81	197	291	340	921	32	2110	441	1.688	1.782	20.857	1.95	232	77	341.3	3.59	48.2	100.7	588	1047	260	11.88
32930	1	2	29	2	5	2	2	2	2		2	2	2	2	1.6	4.4	230	1012	38.99	136.62	50.99	9.8	35.29	11.43	12.634	8.157	81	6.57	254	419	669	1639	29	0	503	0.583	0.841	11.33	2.089	104	42	159.7	4.52	18.8	78.4	215	508	106	6.14
32931	1	1	38	1	1.81		1	2	2		2	1	2	1	2.2	8.4	190	1796	58.92	263.55	128.93	18.5	58.67	15.691	22.557	16.033	148	5.11	176	182	0	71	8	1	49	1.315	1.202	9.833	0.929	228	51	223.9	4.72	179.9	30	809	1406	308	7.22
32932	1	1	74	1	2.73		1	2	2					2	1.6	3.6	181	1738	67.15	339.11	175.57	24.5	18.95	6.384	5.683	4.356	75	3.28	318	413	173	779	560	1695	1094	2.205	2.666	22.396	2.933	704	319	211.4	4.77	329.9	29.3	953	1173	365	29.25
32938	2	2	79	3	1.17		1	2	2					1	1.7	4.3	284	1687	50.07	213.8	127.69	11.7	73.84	28.795	25.046	15.323	212	4.42	816	1318	134	5944	30	0	445	0.997	1.923	15.382	1.504	242	105	225	2.29	28.4	58.1	970	1106	241	11.92
32941	1	2	56	4	1.71	2	1	2	2	2				1	2.9	5.2	286	729	44.12	71.15	19.75	8	29.12	10.003	12.317	3.722	273	1.94	92	103	6	120	14	3044	206	0.631	1.172	8.829	0.624	161	59	240.8	2.1	22.8	13.2	409	558	113	7.05
32943	1	2	63	2	3.12		2	2	2					1	2.1	2.2	297	1678	48.56	189.04	86.26	9.9	83.2	26.199	31.537	17.993	291	5.22	177	215	28	324	235	9566	915	1.125	1.132	10.966	0.787	265	74	209.7	1.91	183.1	25.8	737	898	167	8.65
32947	1	1	48	4	5		1	2	2		1	2	1	1	2	2.8	203	1726	60.01	208.99	72.75	9.7	74.44	23.847	30.049	14.758	111	5.45	159	166	1	81	3	0	142	1.445	2.097	21.202	0.611	389	216	140.5	0.44	6.7	23.2	806	847	223	11.65
32948	1	1	38	2	0.31		2	2	2	1	2	1	2	1	2.3	2.7	425	2412	70.74	379.68	289.67	22.9	72.34	36.206	21.247	11.061	173	5.2	911	1532	2667	6122	101	3859	2409	0.952	2.989	7.645	1.155	216	0	337.9	6.26	40.9	89.5	1974	1814	337	6.54
32950	1	1	44	2	1.24		1	2	2		2	1	1	1	2.7	5.8	215	2390	81.69	331.79	148.47	15.9	85.32	21.12	32.956	24.485	157	6.15	66	136	281	683	1	204	186	1.689	1.652	33.19	1.396	390	225	211	0.65	87.6	76.8	592	1083	268	17.04
32952	1	2	76	5	5		1	2	2					1	1.7	3.9	266	1564	38.93	172.72	84.51	11.3	83.26	34.383	28.494	12.264	202	6.05	441	487	14	488	94	0	257	0.658	1.171	7.849	0.673	198	46	144.2	1.48	81.2	240.6	945	893	230	7.15
32954	1	2	73	3	0.91		2	2	2					1	2.2	5.5	162	1570	77.16	259.9	65.88	31.4	30.98	9.033	9.818	9.005	34	8.47	239	377	23	1570	113	25323	1204	3.348	1.993	22.243	1.829	440	98	197.7	4.37	104.8	77.1	1063	1427	460	14.93
32958	1	2	45	4	5	2	2	2	2		2	2	2	1	1.3	8	307	1359	94.15	91.27	23.9	15.1	71.81	12.876	15.77	38.064	282	5.72	100	581	1667	4899	115	4226	1345	1.16	1.912	34.218	2.02	301	86	324.7	1.25	98.7	90.8	445	1181	331	11.41
32959	1	2	51	4	5	2	1	2	2					1	5.5	4.7	287	2023	96.63	229.02	110.68	8.8	65.5	23.134	28.421	7.042	227	2.69	58	100	40	399	39	4651	197	1.103	1.411	19.762	1.273	236	112	307.7	5.36	276.8	20.5	559	866	179	11.03
32960	2	2	42	2	1.49	2	2	2	2		1	1	1	2	2.3	2.4	206	1324	86.68	125.25	52.48	5.4	51.45	17.231	19.593	9.773	229	0.67	0	20	36	227	5	890	145	1.027	1.323	17.863	1.015	280	155	286.9	8.22	30	38.1	286	718	121	15.45
32962	1	2	40	4	3.26	2	2	2	2		2	1	2	2	1.7	4.6	356	1278	54.2	175.22	60.98	8.2	40.44	15.843	13.095	8.111	104	3.48	266	331	14	736	75	4595	570	1.179	1.041	15.501	0.578	339	245	98	1.49	88.2	67.3	747	779	147	7.83
32963	1	1	32	2	1.55		1	2	2		2	1	2	1	2.4	3.4	269	4078	155.65	334.28	73.01	39.6	196.29	50.261	77.951	54.589	509	17.09	379	819	1419	4558	17	19666	1893	2.073	1.907	34.037	3.138	737	164	654.4	8.2	73.3	160	1128	2292	616	24.15
32964	1	2	30	5	5	2	2	2	2		2	1	2	2	2.1	2	317	2890	122.66	347.53	183.97	20	113.75	43.23	38.306	22.996	376	8.66	1628	1821	274	1792	296	10225	1463	3.326	4.807	59.427	4.718	742	560	410.9	12.58	119	151.2	1382	1749	319	32.84
32965	1	1	40	4	1.71		1	2	2		2	1	2	1	2.7	5.2	258	3535	135.78	481.63	202.42	48.3	126.94	39.214	44.195	32.612	580	10.32	853	937	139	887	205	7874	1536	2.494	4.466	29.221	3.604	610	80	722.8	9.77	283.6	91.7	2600	2854	756	21.49
32969	2	1	78	3	3.11		1	2	2					2	1.5	4.2	232	2786	80.02	365.52	193.6	22.9	114.25	25.315	47.32	33.452	258	9.25	176	751	15	6728	315	3365	12649	1.881	1.359	19.812	2.442	368	59	331.7	5.68	143.2	569.2	677	1422	309	11.84
32972	1	2	67	3	1.33		1	2	2					2	2.5	4.1	457	887	38.78	108.79	48.21	6.8	33.01	9.557	11.954	7.452	497	4.99	159	203	35	506	10	8947	536	0.718	1.224	10.935	0.607	180	90	302.9	2.12	7.6	64.7	369	534	152	7.41
32977	1	1	37	1	3.36		1	2	2		2	1	2	1	2.6	4.5	287	1517	27.05	298.19	243.87	5.5	29.83	6.966	16.038	5.793	66	2.09	0	93	289	421	1094	0	373	0.341	0.261	12.164	0.759	45	3	88.8	0.25	46.2	13	140	627	82	4.79
32979	1	1	50	3	3		2	2	2					1	1.2	6.2	185	1550	65.1	131.14	74.03	7	86.36	30.018	37.035	13.131	154	6.21	335	477	302	1485	45	533	2033	1.022	2.454	19.26	0.991	235	72	193.1	3.62	86.2	150.5	896	1150	187	6.93
32980	1	1	47	5	5		1	2	2		2	2	2	1	3.5	3.4	249	2744	70.71	242.95	97.15	18.7	83.9	37.509	31.404	8.284	224	6.1	315	672	77	3474	1486	1	5352	1.868	1.731	23.226	2.497	692	150	410.6	5.03	369	237.9	1922	1089	421	18.2
32984	1	1	64	2	1.21		2	2	2					1	4.1	4.4	291	1589	42.51	314.56	148.18	18.9	22.38	4.056	7.683	8.73	2	4.76	190	563	1420	3797	0	0	2299	1.378	1.485	17.244	1.3	391	165	187.2	3.12	68.8	109.7	857	851	288	14.07
32986	2	2	45	5	5	2	2	2	2		2	1	2	2	2	2.7	249	3009	114.18	399.27	237.56	22.8	108.42	29.555	42.814	26.231	528	14.9	249	573	39	3943	67	3012	4831	2.372	2.088	24.218	2.769	847	198	676.8	5.35	702.2	581.3	856	1682	486	18.07
32988	1	1	39	4	3.42		2	2	2		2	1	2	1	1.9	3.7	240	2816	157.02	157.27	31.35	10.6	125.82	34.961	51.914	28.01	651	9.48	203	354	442	1588	21	17810	514	1.258	2.103	34.596	2.684	208	88	627.7	8.1	34.2	81.3	442	1737	240	18.38
32989	2	2	66	1	0.94		1	2	2					2	2.5	4.2	318	1807	78.98	231.99	96.5	29.5	68.89	30.289	20.998	11.699	550	5.21	279	377	88	732	855	2062	1489	1.182	1.755	10.346	1.558	438	16	402.2	2.75	258.5	27.2	1627	1603	346	11.78
32991	2	2	64	4	1.52		2	2	2					1	1.8	5.6	333	1576	52.74	182.8	99.25	7.1	71.78	25.232	29.339	10.014	316	3.47	219	240	74	216	17	3809	429	0.92	1.57	13.16	0.743	200	97	245	2.97	17	40.8	565	794	133	10.57
32997	1	1	41	4	1.45		1	2	2		2	1	1	2	2.1	2	194	1897	53.46	185.04	55.9	4.5	47.81	18.933	16.413	6.822	125	2.98	93	103	14	111	33	835	71	0.688	1.301	20.516	1.641	261	81	317.1	3.75	7.8	40.7	553	809	205	8.25
33001	2	1	82	3			2	2	2					2	1	4.8	238	629	25.24	72.69	26.97	6.5	26.91	9.369	8.514	6.331	49	1.3	91	104	20	147	12	515	121	0.64	0.88	5.772	0.454	68	9	101.4	1.53	7.9	12	387	503	99	3.52
33002	1	2	67	3	3.57		1	2	2					2	2.9	3.5	220	3373	88.04	373.08	180.37	30.4	186.65	58.369	81.382	34.789	195	20.69	826	927	121	784	717	774	3094	2.605	3.286	27.97	3.165	799	405	338	8.45	206.6	86.9	1376	2093	668	30.33
33005	1	2	58	5	3.79	2	2	2	2					2	2	4.4	232	2029	87.63	224.57	106.7	18.6	90.03	30.627	33.245	22.141	216	4.67	422	538	436	1099	153	0	360	1.457	2.466	26.372	2.321	359	162	254	5.96	112.2	113	1082	1420	276	23.95
33006	2	1	80	4	2.27		1	2	2					2	1.1	4.7	217	1317	83.35	149.76	68.35	13.6	44.05	8.834	12.784	17.585	283	6.78	185	261	55	870	22	1493	1411	1.155	1.719	23.014	1.764	333	147	307.1	5.92	136.6	153.2	729	1053	270	12.57
33011	1	2	27	4	0.84	2	2	2	2		2	2	1	1	1.6	3.5	198	1698	53.86	161.62	62.58	15.7	71.01	20.616	27.868	18.17	167	10.28	60	699	1889	6631	173	40663	1341	1.096	1.076	24.898	2.139	430	79	313	1.15	205.5	123.8	410	877	319	9.17
33014	1	2	35	5	5	1	2	2	2		2	1	1	2	2.1	7.3	372	2023	81.72	293.97	144.43	12.2	58.32	20.018	24.435	9.954	207	3.25	183	230	68	530	29	1675	412	1.345	1.426	28.435	1.701	292	157	244.1	2.96	42.7	71.3	913	1110	226	12.65
33020	1	1	39	4	1.93		2	2	2		2	1	2	1	2.6	7.3	165	3781	86.01	327.05	176.76	15.5	126.8	40.354	40.343	36.205	245	7.47	305	425	277	1308	18	2507	1670	1.373	1.69	17.682	1.301	368	171	336.4	7.14	11.6	82.8	628	1244	264	14.03
33022	1	2	30	4	3.11	1	2	2	2		2	1	2	1	1.6	8.8	306	2359	88.81	283.09	124.61	14.8	101.75	32.919	46.487	14.662	212	4.03	220	324	437	1027	27	5817	340	1.333	1.563	20.261	1.514	413	198	251.3	3.51	17.6	58.4	731	1226	430	17.65
33023	1	1	29	4	3.85		2	2	2		2	2	2	1	3	5.1	300	2645	109.68	283.55	140.11	19.2	122.21	41.869	49.845	19.241	697	8.58	501	622	65	1264	384	11382	2154	1.784	2.685	23.326	2.049	377	127	598.5	6.67	110.8	75	1225	1815	311	17.2
33026	1	1	36	5	5		1	2	2		2	1	2	2	1.4	2.2	307	2689	86.28	272.61	54.86	22.4	59.36	13.746	27.585	13.745	206	17.63	452	648	21	2350	10	0	2869	1.871	2.33	32.39	2.351	711	309	318	2.48	164.5	348	684	1487	347	18.77
33028	1	1	27	3	1.54		1	2	2		2	1	2	2	2.6	2.5	239	1153	52.69	154.71	70.34	5.8	36.14	16.432	12.402	4.422	142	1.37	167	199	41	336	40	861	245	0.842	0.839	14.382	0.634	180	102	116.3	0.74	64	17.4	513	703	97	7.05
33029	1	1	24	4	3.5		2	2	2		2	1	2	2	2.2	2.4	327	404	41.02	42.98	21.9	14.4	10.34	2.534	3.494	2.877	90	5.86	27	284	20	2977	213	34	3623	0.557	0.63	14.833	1.297	479	0	200.5	0.33	257.5	387.4	306	450	137	3.77
33037	1	1	35	5	3.67		1	2	2		2	2	2	2	2.4	5.4	264	2979	114.33	287.47	56.81	25.4	154.19	56.397	62.564	25.826	656	6.87	469	505	56	429	16	6450	457	2.503	2.582	25.58	2.36	534	255	509.3	4.53	38	46.3	1562	2007	347	18.82
33039	1	1	26	2	2.71		2	2	2		2	2	2	1	1.9	3.5	270	2884	114.79	335.35	196.44	13.6	122.56	41.274	53.226	18.738	302	6.98	660	720	66	672	9	14864	304	1.659	2.415	31.461	2.433	332	185	349.8	7.79	26.2	54.8	1048	1791	252	18.67
33042	2	1	28	2	2.27		2	2	2		2	1	2	1	2.6	4.2	252	5487	124.36	839.05	474.13	28.6	188.46	76.038	76.743	34.944	450	8.87	456	516	0	703	5	25153	367	3.309	3.625	32.527	2.234	737	337	426.9	4.56	217.9	72.7	1590	2174	459	28.99
33046	1	2	30	4	1.5	2	2	2	2		2	1	2	2	1.4	4.4	222	2511	116.78	272.82	72.81	18.2	108.56	37.616	39.286	15.786	313	10.74	362	1044	2941	6729	1	8727	609	1.801	2.787	29.847	2.571	337	136	451.2	6.32	21.6	61.3	1155	1877	430	16.35
33047	1	2	58	5	5	2	2	2	2					1	1.7	4.6	296	2142	82.95	270.02	118.04	20.2	71.15	24.597	26.996	14.582	172	5.35	998	1031	55	373	13	919	270	2.034	2.566	23.223	1.937	528	283	261.4	2.25	143.3	43.9	1258	1356	359	22.49
33055	2	1	39	5	5		2	2	2		2	2	2	2	2.7	5.5	234	1246	55.15	158.56	54.92	15.9	48.7	9.543	19.761	16.34	32	12.21	301	388	0	953	223	15468	126	1.34	1.701	25.753	3.164	545	404	150.5	7.72	55.9	18.4	491	970	312	15.33
33059	2	2	38	1	1.16	2	1	2	2		2	1	2	2	1.8	4.1	282	2925	100.62	442.12	218.2	14.8	86.36	29.903	26.783	18.539	324	8.74	351	576	2	2385	639	0	132	2.005	1.135	12.923	1.273	236	103	258.4	10.85	263.8	34.9	2275	2036	460	9.61
33060	1	1	28	3	1.49		1	2	2		2	1	2	1	2.1	3.6	267	4216	209.43	414.9	79.6	34.3	128.02	30.932	45.381	41.639	464	11.62	254	380	20	1506	9	14558	1675	3.46	3.174	81.231	4.982	956	377	768	2.84	172.3	274.9	1037	2433	592	29.83
33067	1	2	38	3	3.63	2	2	2	2		2	1	2	2	2.5	3.5	211	1419	44.91	182.33	110.96	5.5	58.71	20.396	24.195	9.859	143	2.5	109	113	0	47	9	0	82	0.614	0.985	10.974	0.941	149	43	145.9	3.26	32.6	21.4	392	638	125	7.4
33071	2	2	69	2	0.91		1	2	2					2	2.4	4.1	304	1431	61.41	171.43	52.7	19.7	60.1	14.132	25.532	17.426	150	4.87	243	364	376	1239	30	1158	843	1.117	1.135	23.273	2.143	225	37	228.1	1.79	67.9	96.7	467	1003	191	7.96
33072	1	2	33	5	5	2	2	2	2		2	1	2	2	1.4	4	300	2259	90.79	293.34	152.98	14.2	79.57	20.464	27.161	24.268	432	6.57	515	576	29	453	440	2046	1139	2.223	3.064	33.2	2.341	624	410	434	4.18	176.7	119.5	1114	1486	236	19.82
33076	1	1	54	1	1.71		1	2	2					1	2.5	2.3	309	1604	56.04	202.58	44.19	21	64.8	22.957	25.102	12.909	118	5.66	131	271	95	1210	815	16086	276	1.627	1.57	22.119	1.058	363	247	209.6	1.34	96.3	81.8	802	774	301	14.29
33077	1	1	72	4	2.18		1	2	2					1	2.4	4.2	193	2246	91.03	330.68	136.41	33.5	68.26	28.14	21.839	12.441	170	8.3	1191	1784	1902	6080	155	8017	1691	2.458	3.312	36.112	4.107	877	598	255.5	11.06	210.6	98	1584	2105	433	35.6
33080	1	1	44	5	3.63		2	2	2		2	2	2	2	2.1	4.8	248	2795	68.11	390.31	164.43	16.5	91.64	24.35	36.17	21.76	464	3.61	288	299	0	135	8	5386	407	1.96	2.503	25.743	2.047	365	163	449.8	2.25	35.3	37	599	1546	251	15.13
33081	2	1	42	2	0.6		2	2	2		2	1	2	2	1.5	3.6	238	3697	139.17	474.35	296.19	24	142.58	72.333	39.529	14.067	348	7.84	1320	1372	16	559	324	9709	616	2.886	5.258	18.604	2.279	729	164	460.4	10.39	215.7	43.6	3490	3144	562	20.97
33082	1	2	21	4	3.11	1	2	2	2		2	2	2	2	1.7	5.8	271	2995	102.86	411.01	193.4	20.7	108.91	38.453	33.809	28.096	878	10.83	1216	1683	37	5180	507	3	2185	2.694	3.677	34.282	4.363	617	348	626.5	9.09	306.1	113.8	1478	1697	373	27.44
33086	1	1	56	5	2.3		2	2	2					1	3.2	3.8	255	2367	27.21	398.47	277.16	7.8	77.76	27.026	25.767	19.049	404	8.27	311	318	0	71	31	0	402	0.372	0.802	3.837	0.454	180	95	248.9	1.27	114.7	29.3	255	465	78	6.56
33088	1	2	46	4	5	2	2	2	2		2	2	1	2	2.5	3.6	292	2415	76.67	279.05	91.23	13.7	95.87	29.11	37.461	22.611	178	7.58	657	1175	1943	5214	87	10152	860	1.619	1.874	26.943	1.895	393	216	206.6	2.95	30.4	111.4	794	1177	210	16.7
33092	1	2	32	4	2.43	2	2	2	2		2	1	2	2	2.8	6.4	333	1980	62.24	251.17	100.68	30.6	85.7	31.82	34.796	14.644	187	6.21	385	779	1340	4031	43	1345	1118	1.472	3.893	19.408	1.705	421	196	277.3	6.46	73.1	117.3	923	1128	284	31.78
33093	2	1	74	3	3.03		2	2	2					2	1.6	3.7	157	1373	48.6	184.5	82.98	15.5	53.22	15.437	23.208	11.665	107	7.25	416	719	1095	3055	56	2485	1322	1.3	2.063	20.931	1.983	329	204	170.7	4.52	89.1	143.7	797	1093	240	14.06
33095	2	1	31	4	1.09		2	2	2		2	2	2	2	2	2.3	298	3765	138.02	409.31	236.32	17.4	181.06	65.691	65.22	34.713	996	7.63	604	708	84	908	577	7223	1222	1.737	3.144	29.226	1.855	448	153	636	10.58	149.8	100.8	1720	2000	370	26.58
33096		1	81	5	5		2	2	2					2	1.5	1.7	172	1443	56.73	231.39	120.24	20.6	38.89	13.401	14.228	7.314	113	5.6	423	488	45	582	381	0	1139	1.606	2.192	23.491	2.665	376	177	204.7	6.01	111.6	33.3	750	1011	332	17.64
33099	1	2	51	5	4.7	2	2	2	2					2	1.5	2.7	222	1953	64.96	207.69	114.86	12.7	101.28	27.717	36.484	29.358	130	9.91	496	750	801	2656	3	2872	611	0.77	2.253	13.403	0.996	223	21	256.8	3.29	29.2	110.6	1342	1450	332	9.13
33107	2	2	57	5	5	2	1	2	2					2	2.5	4.6	316	2030	58.56	282.17	120.67	17.3	77.91	20.236	27.496	23.787	252	5.49	202	1285	281	12858	5	0	302	1.239	1.395	14.516	1.368	209	100	223.7	1.65	56.2	88.9	484	1126	231	12.11
33108	2	2	81	2			1	2	2					2	1.4	3.3	248	1297	57.23	187.61	115.35	11.5	38.46	13.412	13.348	8.291	130	2.81	478	702	821	2227	80	0	1156	1.644	1.841	21.35	2.257	430	286	187.7	4.64	71.5	33.4	643	928	201	15.71
33109	1	1	30	4	4.04		1	2	2		2	1	2	2	2.1	4.1	283	2993	128.21	481.57	283.03	46.3	71.52	25.551	27.798	11.081	577	7.61	851	1014	92	1922	27	553	5652	2.204	4.383	25.717	3.406	504	65	676.4	15.49	253.3	230.5	2220	2714	603	14.15
33114	1	1	64	4	1.36		1	2	2					1	2.2	3.7	244	3323	138.24	320.16	113.41	26.8	174.58	46.209	69.642	48.049	237	19.96	593	724	494	1310	16	0	334	2.305	3.821	42.915	2.718	607	166	486.6	9.24	94.4	284.2	1544	2463	633	18.22
33116	2	2	27	1	1.63	1	1	2	2		2	1	1	1	1.6	5.6	210	1180	48.51	213.32	98.43	20.8	18.73	4.893	5.512	5.908	89	2.24	1	43	76	437	30	1277	451	0.769	0.778	12.252	1.618	153	36	163.6	0.87	225.4	20.1	358	927	240	7.4
33117		1	45	4	3.31		2	2	2		2	1	2	2	1.7	2.2	275	3275	117.94	490.44	245.37	24.2	99.91	31.448	38.046	15.367	261	9.84	718	1169	131	5165	205	545	9166	2.34	3.533	34.276	3.093	631	346	413.8	10.04	96.2	486.6	1570	1753	442	26.18
33121	1	1	49	3	1.88		2	2	2		2	1	1	1	1.3	4.2	187	2310	107.8	250.98	144.01	11.7	100.22	32.082	38.194	19.905	372	3.29	187	375	605	1810	163	5134	1161	1.634	1.868	28.434	1.462	350	147	299.7	6.39	58.1	163.6	421	1202	182	15.01
33123	2	2	52	4	5	2	2	2	2					1	1.9	5.5	293	2571	63.15	242.91	37.45	23.3	156.64	27.841	58.803	63.456	115	15.7	139	241	281	1092	2	10025	168	1.318	0.79	28.661	3.326	229	34	233.1	0.72	121.6	210.2	377	989	330	8.28
33128		2	28	3	1.03	2	1	2	2		2	1	2	2	3.4	4.5	320	2576	55.89	321.26	121.37	19.9	61.9	12.953	29.533	12.159	123	8.42	31	71	26	458	33	14641	609	1.477	1.419	24.797	2.008	484	196	330.7	2.07	74.5	79.9	540	941	327	14.64
33130	1	1	27	2	0.3		2	2	2		2	1	2	1	1.7	4.6	213	2980	119.8	313.97	167.04	11.9	88.52	31.537	41.507	7.463	328	3.39	0	46	32	475	26	10030	121	0.974	1.706	38.48	3.099	307	32	539.7	11.19	182.7	29.7	509	1396	343	16.11
33131	1	2	33	3	2.25	2	1	2	2		2	1	2	2	2.6	7.6	366	3513	97.99	492.39	254.78	16	131.94	38.449	50.738	31.63	286	10.53	502	534	26	376	2	7271	580	1.884	2.716	27.797	1.239	418	242	255.2	3.22	17	102.9	1152	1525	256	19.68
33134	1	1	42	4	1.08		1	2	2		2	1	2	1	2.5	6.3	171	2414	94.59	315.69	178.29	28.1	87.87	32.158	31.194	16.802	214	9.22	221	1750	12	18330	5	6343	572	1.994	2.681	19.568	1.337	399	117	343.8	3.76	79.4	54.6	1236	1508	318	17.25
33139	1	2	34	1		2	1	2	2		2	1	2	2	1.9	5.9	384	3424	150.5	467.01	193.82	36.9	111.06	22.189	33.226	44.592	334	11.38	123	179	91	596	18	1225	936	1.617	1.55	43.217	3.321	497	156	435.7	1.82	137.9	80	891	1870	525	24.53
33140	1	1	42	1	0.6		2	2	2		2	2	1	1	2	2.8	228	1741	69	132.66	73.02	9.3	80.05	33.029	22.103	18.481	507	8.44	331	890	2142	5578	175	1553	2037	1.448	1.004	18.85	1.628	354	32	480.8	11.22	95.2	120.2	512	959	217	7.26
33144	2	1	58	5	5		2	2	2					2	2.2	4.3	268	3319	139.85	339.32	150.26	19.3	158.79	53.156	65.231	27.318	409	16.67	449	690	97	2413	885	19786	3222	3.214	3.312	36.949	2.395	698	240	457.6	5.24	310.6	187.4	2071	1964	480	22.68
33146		2	28	5	5	3	2	2	2		2	1	2	1	3.4	4.1	376	2804	90.35	315.34	115.87	17.6	109.42	37.573	35.36	27.119	183	7.49	184	276	123	973	160	20187	1553	1.745	1.97	24.539	1.726	419	150	323.7	4.06	52.8	65.6	1239	1519	359	15.71
33153	1	1	82	5	5		1	2	2					2	1.2	2.2	178	1784	58.06	180.81	63.1	14	47.95	13.694	16.808	12.498	453	4.7	231	305	97	825	23	3826	991	1.133	1.77	15.806	1.478	255	51	379.4	3.13	51.2	67.8	422	902	202	9.98
33154	1	1	46	3	1.37		1	2	2		2	1	2	1	1.3	3.5	172	2965	155.94	289.39	129.25	17	80.16	28.721	33.855	11.239	419	4.26	179	484	1129	3086	6	16128	408	3.297	3.101	52.246	4.08	509	239	681	9.71	40.2	47.8	918	2043	416	23.99
33161	2	1	33	3	1.62		2	2	2	2	2	2	1	1	2.2	4.1	336	2261	38.39	453.99	328.87	16.5	40.01	10.485	11.457	12.552	93	7.16	18	313	1114	2957	82	0	775	0.74	0.805	14.805	1.281	257	106	154.8	0.26	173.9	75.4	284	532	190	9.28
33162	2	1	51	3	2.8		1	2	2					2	1.6	3.8	261	2695	102.73	308.55	148.35	15.6	118.94	42.608	44.735	21.276	688	6.35	361	467	124	1107	229	217	2308	1.525	1.799	27.552	1.402	450	187	519.6	8.44	23	97.5	575	1263	222	17.05
33163	2	2	21	4	2.49	2	2	2	2		2	2	2	2	2.2	3.3	218	2267	85.28	256.24	149.57	8.5	100.64	46.218	32.932	12.3	241	1.94	458	518	68	456	425	1071	880	2.391	2.901	25.337	2.084	463	312	277.9	10.41	114.2	39.3	1083	1194	212	19.55
33166	1	1	27	5	3.01		2	2	2		2	2	2	1	3.2	5.5	270	2612	116.75	317.81	84.5	30.5	101.96	34.617	37.34	22.738	267	8.15	215	246	0	369	1	0	1610	2.785	2.42	35.256	2.017	550	275	390.8	2.44	45.9	68.5	640	1660	396	17.33
33168	1	1	52	3	0		2	2	2	1				1	1.9	4	210	3802	142.8	275.72	136.65	22.9	194.77	62.851	92.511	24.741	494	13.22	322	437	62	1299	104	29413	479	3.115	3.386	47.741	3.351	351	89	887.4	9.1	37.5	90.4	713	2084	399	20.68
33169	2	2	20	4	3.98	2	2	2	2		2	2	2	2	2.2	1.3	207	2451	67.64	337.93	199.58	11.2	93.79	38.503	31.365	16.227	165	4.87	503	572	49	622	51	4433	380	1.699	2.328	20.847	1.544	421	278	172.7	5.68	409.8	40.2	1075	1068	188	15.92
33170	1	2	42	3	1.61	2	1	2	2		2	1	2	1	2.6	6.9	285	1835	47.46	296.71	143.1	7.5	52.39	22.906	16.399	8.122	169	2.33	248	258	0	125	2	4822	154	1.23	1.921	12.363	0.488	255	127	134.9	1.77	4.8	18.4	798	867	144	9.89
33177	1	2	40	5	5	2	1	2	2		2	1	1	2	1.6	4.5	192	1424	83.52	153.71	105.49	16.6	55.87	22.616	19.147	8.583	662	6.1	339	850	38	6107	63	14714	6656	0.802	1.768	10.832	1.249	393	6	486.8	3.22	148.5	394	1238	1296	303	13.35
33181	1	2	40	5	1.17	2	2	2	2		2	2	1	2	2.4	5.7	324	1306	96.32	118.44	68.35	9.3	52.43	19.452	17.429	8.965	877	4.08	448	660	1	2501	30	1	3317	0.51	1.581	27.282	1.743	212	4	509.3	3.21	85	169.6	496	988	172	7.82
33182	1	1	73	3	1.19		1	2	2					1	1.1	4.6	165	2332	63.26	413.42	268.11	24	57.01	17.799	23.344	11.569	122	7.69	357	479	59	1164	553	6876	833	1.017	2.154	22.102	1.972	196	16	253.4	3.13	63.6	37.7	987	1568	300	8.78
33183	2	1	26	3	3.59		1	2	2		2	1	2	2	2.4	12	417	2852	108.3	399.95	148.1	30.5	93.15	26.893	42.485	17.407	506	6.29	165	223	46	286	795	0	1149	2.419	1.818	31.557	2.213	635	247	446.7	3.94	236.6	43.1	1228	1716	343	19.89
33184	2	1	77	1	0.39		1	2	2					2	3.1	5	212	2113	89.07	321.48	180.73	17.8	56.1	16.239	21.378	13.712	204	6.33	72	166	85	1077	26	515	139	0.918	1.117	26.957	2.412	216	80	336	4.62	70.1	35.4	307	1102	264	12.38
33186	1	1	38	1			1	2	2		2	1	2	2	1.6	3.9	359	2874	85.38	443.93	210.81	34.8	89.23	22.077	37.975	21.874	639	8.18	274	303	1	324	27	13459	537	2.04	1.898	15.825	1.299	678	263	477.1	1.89	15.9	71.7	611	1336	271	23.94
33187	2	1	41	4	1.65		2	2	2		2	1	2	2	2.2	5.8	360	2286	70.6	253.6	73.62	15	110.57	31.985	45.904	25.194	545	7.28	652	681	47	335	15	1141	547	2.014	2.625	29.919	2.487	466	219	414.6	5.07	16.1	83.8	550	978	254	19.44
33190	1	1	32	3	0.37		2	2	2		2	1	2	1	1.8	4.9	264	1284	54.4	95	16.37	8.4	75.15	28.992	29.312	9.252	373	2.73	282	297	3	159	10	3786	256	2.518	2.373	15.811	0.619	276	92	275.7	3.36	4.3	17.2	617	794	208	9.33
33191	1	1	47	3	0.88		1	2	2	2	2	1	2	1	3.9	4.9	231	1094	32.47	143.04	19.96	5	18.37	7.793	7.339	1.013	68	0.65	25	118	290	965	24	798	565	0.736	0.793	12.178	1.09	251	156	166.3	1.43	17.2	13.4	143	488	142	6.84
33196	2	2	28	5	3.98	1	2	2	2		2			2	1.6	6.7	292	1472	71.89	157.46	19.76	18.4	63.33	16.289	28.861	12.17	331	10.25	138	160	21	220	115	7	778	1.235	1.732	19.617	1.244	253	80	337.9	1.49	15.6	18.1	556	1186	329	11.61
33197	1	2	85	4	5		1	2	2					1	2.5	9.4	262	1597	59.31	216.1	104.69	15.5	58.71	29.526	17.372	6.868	167	3.13	726	788	29	616	214	0	727	1.102	2.196	12.161	1.399	345	84	283.9	4.62	140	49.5	1150	1138	245	9.31
33198	1	2	34	4	1.33	1	1	2	2		2	1	2	1	1.5	5.6	247	2231	91.19	333.73	243.59	6.1	60.72	25.392	23.574	6.172	212	2.85	608	656	60	575	6	4416	770	1.037	2.723	12.707	1.237	248	104	369.7	8.43	52.4	81.6	1733	1608	290	12.31
33200	2	2	50	2	1.52	2	1	2	2					1	1.5	3.3	552	2867	94.31	342.01	150.26	8.3	126.86	43.272	48.657	23.669	727	8.44	452	488	2	397	81	16459	631	1.87	2.418	18.202	1.01	334	196	430.2	4.57	153.8	42.4	1275	1935	185	17.73
33201		2	51	4	2.71	2	1	2	2					2	2.7	2.6	222	2316	67.28	350.38	185.17	16.6	75.78	22.141	29.617	18.066	261	7.04	332	823	638	4239	2677	18380	2064	1.249	2.469	17.196	1.3	398	54	316.4	4.24	24.7	52.5	885	1257	410	13.88
33202	1	1	43	4	4.04		2	2	2		2	2	1	1	2	2.4	255	2920	144.82	253.6	102.15	11.9	130.62	47.974	53.711	16.363	740	5.38	703	714	0	151	8	0	390	1.802	3.013	32.865	3.205	344	132	721.4	8.95	31.5	47.2	1191	2042	335	17.09
33206	2	2	32	5	1.88	2	2	2	2		2	2	2	2	2.6	7.3	307	2205	88.21	270.62	122.29	22.8	88.48	21.778	35.23	23.562	194	10.32	343	2015	7381	16376	0	0	1523	1.081	1.663	20.616	3.236	219	35	403	5.7	171.6	106.2	661	1238	314	14.84
33207	1	2	62	2	1.46		1	2	2					1	2	3.6	322	1646	42.83	185.05	122.68	4.4	58.44	25.695	17.884	10.41	143	2	284	292	7	121	7	0	67	0.687	2.191	7.413	0.598	204	52	158.9	2.85	37.4	21.9	1058	1162	186	4.86
33213	1	2	50	4	4.08	2	2	2	2					1	1.9	1	331	2161	49.26	164.98	33.39	11.7	129.18	32.299	43.154	44.285	225	14.66	216	274	49	659	3	8818	524	1.265	1.195	11.733	0.713	312	141	203.3	1.68	21.2	125.2	617	713	204	10.16
33214	1	1	62	4	5		1	2	2					1	1.7	1.9	181	1813	55.45	220.32	130.54	5.3	43.08	14.464	18.62	5.311	326	3.22	100	189	41	541	992	555	1299	1.926	1.282	14.231	1.367	354	139	292.5	2.52	265.1	54.9	500	691	214	12
33217	1	1	24	5	0.63		2	2	2		2	2	2	1	2.1	2.5	198	3215	128.03	325.27	123.63	22	144.59	49.28	53.274	29.151	599	10.05	520	593	84	637	422	4076	1084	2.298	3.126	40.717	2.456	599	228	565	6.43	132.9	50.6	1589	2241	412	19.66
33221	1	1	40	1	0.88		1	2	2		2	1	2	2	2.2	2.7	94	1624	82.07	284.4	211.62	7.3	19.77	3.969	8.739	4.259	127	4.68	102	264	43	1341	1155	2	731	0.841	2.019	26.694	4.43	225	15	304.4	14.61	324.6	11.2	939	1120	270	6.6
33223		1	45	3	0.6		2	2	2		2	1	1	2	2.7	5.8	235	2842	125.56	213.64	95.13	19	168.75	46.022	69.292	39.282	1143	20.96	696	734	19	373	199	1	1019	1.73	3.294	19.695	1.998	348	106	772.4	9.44	97.8	65.1	1263	1944	387	15.91
33225	1	2	23	4		2	2	2	2		2	2	1	1	2.4	4.7	305	2545	100.29	279.57	101.73	16.3	112.72	38.526	45.618	19.275	314	8.85	124	220	89	1102	1	19672	503	1.779	1.85	34.13	1.528	368	218	338.5	5.56	24.5	114.6	819	1293	270	16.82
33227	2	2	21	4	0.4	2	1	2	2		2	1	2	2	1.9	2.4	288	1774	67.83	273.43	85.01	24.9	49.91	22.889	14.157	9.347	164	4.92	203	238	26	399	9	8836	468	0.916	1.316	13.133	1.809	190	74	158.9	2.2	99.8	34	1386	1764	364	10.74
33228	2	1	44	2	0.6		1	2	2		2	1	2	2	2.8	6.7	295	2354	81.67	283.68	176.09	15.5	106.68	36.039	32.215	26.77	200	10.3	440	731	724	2947	380	6390	2263	1.532	1.341	14.025	1.552	231	33	240.9	4.93	64.4	189.4	1395	1569	218	7.25
33229	1	2	29	1	1.06	1	1	2	2		2	1	1	2	2.5	11.7	253	1707	62.36	294.72	152.63	16.4	38.64	12.875	12.676	8.908	502	4.73	563	1196	1371	6552	820	49390	814	1.835	2.746	24.831	3.341	433	264	393.9	6.1	129.5	35.5	889	1068	341	21.27
33230	1	1	41	3	3.9		2	2	2		2	2	1	1	2.7	2.6	347	4334	130.37	485.37	142.29	28	175.75	57.982	74.867	31.681	247	8.49	489	523	69	371	11	200	339	2.981	3.697	37.012	3.082	695	343	621.9	8.02	67.6	195.5	1394	2561	702	30.7
33231	1	1	29	3	3.36		1	2	2		2	1	2	2	3.1	4.9	287	1454	96.78	139.92	122.46	10.4	57.66	22.565	18.913	9.846	774	4.76	409	775	1293	3730	54	1205	1063	0.735	1.85	31.951	1.942	146	0	522.8	3.08	57.8	58.1	513	1164	192	6.82
33232	2	2	31	4	3.48	2	2	2	2		2	2	1	2	2	2.7	429	1874	90.55	246.73	143.72	7.1	58.51	13.216	21.364	18.772	405	5.15	80	129	5	496	40	9	823	0.785	1.228	29.212	1.552	236	121	325.7	3.13	274.6	60.7	416	1202	261	11.21
33235	1	1	66	5	3.74		2	2	2					1	2.5	2.6	325	2038	113.45	317.98	183.55	21.2	39.72	17.168	11.05	6.966	216	8.94	828	2162	750	15555	225	32144	23280	1.852	3.271	30.621	2.749	558	89	545.3	10.61	258.9	1020.2	1964	2143	559	15.1
33236	1	2	68	4	3.18		1	2	2					1	2.2	3.7	220	2281	69.52	251.05	69.95	17.9	111.95	32.544	41.665	29.633	528	6.47	408	455	37	531	14	11252	697	1.576	2.198	16.21	1.888	277	115	419.2	3.21	77.1	71.4	963	1352	241	12.28
33239	2	1	20	2	2.27		1	2	2		2	2	2	1	3	3.2	236	4661	160.58	665.49	271.18	49.7	157.12	56.626	57.446	28.177	246	19.74	248	1871	4082	17446	8	255847	2549	4.732	4.367	54.388	4.907	1198	512	417.2	4.95	903.5	184.2	2073	2477	627	41.97
33240	1	1	46	5	5		2	2	2		2	1	2	2	1.7	3.1	238	2861	92.26	390.06	218.84	23.3	106.4	23.985	45.935	26.91	291	9.09	824	1094	1	3247	6	31062	2485	2.924	3.946	34.804	3.769	628	361	517	53.51	88.5	211.5	1182	2112	734	55.1
33241		1	39	3	3.87		2	2	2		2	2	2	1	1.7	4.9	258	3723	132.97	420.23	189.06	19.1	152.84	60.63	47.41	33.989	466	9.12	682	1459	3345	7643	2	546	1284	2.194	3.018	41.541	1.924	574	357	407.3	2.44	99.2	68.3	1281	1858	363	17.42
33244	1	2	28	3	5	1	2	2	2		2	1	2	2	1.4	7.1	201	1740	88	184.32	97.27	14.7	74.67	24.867	31.653	12.136	175	7.76	380	686	887	3236	16	9143	1479	1.567	2.083	12.905	1.128	267	73	288.2	2.9	223.5	117	1286	1497	323	12.25
33245	2	2	32	4	3.75	1	2	2	2		2	2	2	2	2	5.9	276	1431	58.07	180.48	102.85	6.6	53.7	18.731	21.674	9.393	337	16.28	319	775	2002	4490	5	0	281	1.007	1.328	28.786	1.585	227	112	282.5	2.63	94.2	25.5	428	1005	229	10.77
33246	1	2	73	4	3.41		2	2	2					2	2.3	3.3	182	1175	52.16	189.47	55.48	9.8	46.9	11.859	17.108	14.596	251	7.53	393	443	5	523	181	0	571	0.608	1.777	17.971	1.318	130	23	260	5.19	39.9	68.7	1002	1028	342	6.52
33247	1	2	55	5	4.52	2	2	2	2					2	1.4	2.3	238	1439	41.35	209.38	67.8	12.9	49.82	16.024	14.824	15.285	88	4.77	305	339	64	386	10	1565	223	1.253	2.613	33.466	3.588	223	97	159	5.31	65	60.4	623	734	209	7.09
33249	2	1	30	3			1	2	2		2	1	2	1	2.2	5.9	265	3694	136.05	617.45	263.84	44.1	84.14	21.025	37.448	18.381	317	10.6	54	384	131	3515	887	57622	1043	4.122	2.539	36.519	3.119	717	363	426.4	1.91	317.4	72.2	1195	1952	558	26.99
33256	1	1	38	5	5		2	2	2		2	2	2	2	1.8	2.4	193	2753	144.21	259.43	96.27	10.6	83.67	25.705	31.323	18.949	364	4.55	783	819	53	374	48	1197	455	1.885	2.501	56.243	3.682	582	399	508.3	5.74	30.7	43.7	1028	1698	350	20.11
33257	1	1	24	2			2	2	2		2	1	2	1	1.7	8.3	294	1603	28.48	267.24	202.54	4	48.88	24.602	17.411	3.87	62	2.88	242	265	13	104	351	0	376	0.858	1.361	5.522	0.753	235	98	134.6	2.58	132.8	9.9	818	842	166	8.4
33260	2	1	67	2	1.36		2	2	2					1	3.7	4.2	274	784	38.94	78.08	48.41	1.5	35.23	12.934	13.865	4.71	299	1.69	293	330	26	154	545	4	647	1.36	1.623	11.614	1.467	212	105	239.5	4.34	127.9	3.5	881	654	104	10.14
33261	1	1	51	3	5		1	2	2					1	2.3	3.2	216	1727	47.99	301.58	199.1	11.4	31.41	11.815	9.584	6.962	117	2.93	152	219	72	749	48	1432	273	0.908	1.172	17.317	1.072	262	94	190.8	2.35	61.9	20.4	424	744	188	7.68
33262	2	2	29	1	0.66	2	1	2	2		2	1	1	2	3.3	6.5	402	1108	48.4	171.44	79.51	19.1	27.62	8.061	9.296	6.585	545	3.54	221	336	446	1138	43	2196	756	0.611	1.079	6.033	0.96	248	23	380	2.52	16.3	30.7	434	962	214	8.06
33263	1	1	61	1	0.63		1	2	2					1	1.5	5	299	1604	37.59	220.23	62.5	16.7	68.59	21.69	22.853	11.264	76	7.62	411	427	68	181	1	209	111	0.946	2.64	11.277	1.597	240	79	184.7	2.6	25.3	44.6	946	908	378	7.66
33265	1	1	85	4	4.39		1	2	2					1	3	3.2	215	3014	82.19	280.25	145.53	19.1	97.7	40.156	31.896	16.97	243	6.39	871	977	327	1052	79	2911	316	2.664	3.983	34.156	3.749	499	326	418.4	10.29	49.3	81.8	1081	1631	393	24.5
33270	1	1	36	2	1.77		2	2	2		2	2	2	1	2	3.5	276	6648	325.56	496.59	85.9	17.6	238.33	81.469	86.446	47.782	992	7.87	1226	1253	0	387	2	0	118	3.241	5.259	86.683	6.753	804	356	1266.2	11.39	58	74.9	2641	4439	840	26.51
33271	2	1	68	1	0.91		1	2	2					1	1.6	1.8	230	840	69.59	56.54	1.9	3	36.63	7.873	13.609	12.372	267	3.35	87	91	0	43	1	0	44	0.569	0.884	19.612	1.119	171	88	206.3	3.6	12.6	55.1	342	653	167	14.33
33272	1	1	32	4	4.66		2	2	2		2	1	1	2	1.9	4.3	168	2443	178.65	337.9	148.32	57.6	56.76	11.657	24.474	13.52	266	38.71	1502	5672	227	49733	403	0	3317	3.319	2.691	88.125	7.017	739	17	610.2	6.17	371.3	202	2523	2548	1088	41.92
33274	2	2	53	3	2.3	2								2	1.5	4.8	325	1555	61.73	228.45	81.98	25.2	47.3	14.835	18.989	7.439	114	5.63	141	195	71	579	118	11654	642	1.13	1.488	17.009	1.27	263	95	203.3	2.49	60.4	29.2	354	1050	271	12.52
33275	1	1	42	4	3.48		2	2	2		2	1	2	2	2.5	3.9	251	4370	203.73	585.92	293.34	39.3	138.28	40.948	64.353	27.041	333	49.02	2719	2755	26	369	78	1150	378	4.649	4.325	100.881	7.167	1196	137	745.3	9.42	156.1	87.3	2757	3800	804	50.92
33277	1	2	77	1	1.48		1	2	2					1	1.6	4.3	359	1934	42.99	271.24	125.01	14.3	79.01	16.357	28.965	28.49	152	15.05	101	1130	276	12142	59	1924	23446	1.404	1.537	13.179	0.88	457	176	173.2	1.49	130.1	937	997	839	235	13.55
33280	2	2	35	4	3.43	2	2	2	2		2	2	2	2	1.9	3.6	224	973	16	137.77	75.35	14.1	42.6	8.229	14.807	17.622	15	4.53	39	124	109	949	3	1158	2014	0.391	0.221	2.157	0.279	88	0	38.2	0.21	12.4	93.8	264	408	162	3.72
33283	2	1	43	3	4.08		2	2	2		2	2	2	2	2.2	3.8	263	3427	156.94	380.28	105	43.2	145.41	47.758	59.621	22.143	346	12.32	286	392	103	1192	87	21361	496	1.893	2.711	37.559	3.33	573	238	486.7	12.14	67.4	76.5	1292	2285	552	32.15
33285	2	1	81	1	3.86		1	2	2					2	2.6	12.2	702	2005	76.94	266.76	132.69	18.9	71.04	23.407	30	11.426	181	6.07	470	760	912	2686	726	0	1100	1.782	2.231	16.255	1.736	367	89	291.1	3	214	110.2	1364	1435	337	13.59
33287	1	2	44	4	0.3	2	1	2	2		2	1	1	1	2.6	6.2	286	596	14.22	113.14	87.16	1	10.79	5.187	3.607	0.816	35	0.09	298	303	5	16	0	0	106	0.519	0.832	7.945	0.713	121	99	47.1	2.75	14.6	1.7	238	296	29	6.28
33291	1	1	79	5	1.14		2	2	2					1	1.8	4.3	292	1863	54.77	236.58	151.15	12.6	58.65	31.71	19.331	7.031	204	4.68	356	433	7	841	228	0	1227	1.176	1.957	18.04	1.908	374	125	224.7	3.73	223.4	128	1128	1124	273	20.72
33294	2	2	60	5	2.49		2	2	2					1	2.5	2.6	256	2181	77.9	250.2	132.2	10.3	100.09	32.557	41.979	16.84	679	5.69	412	471	39	674	63	0	486	1.15	1.771	15.411	1.065	328	188	432.2	2.84	62.8	35.9	559	1132	194	27.96
33300	2	2	48	2	1.6	2	1	2	2		2	1	1	1	1.7	4	234	2095	97.15	240.45	43.24	34.9	84.91	27.499	29.523	19.545	489	10.45	188	239	25	612	9	13700	614	1.114	1.378	16.568	2.143	391	98	400.2	4	99.9	73.8	927	1628	421	18.93
33307		1	51	3	0.05		1	2	2					2	1.6	3.1	216	1516	53.36	184.4	71.56	10.5	63.57	19.276	21.951	17.239	155	4.83	397	416	10	193	12	0	343	1.395	1.44	15.018	0.784	249	168	149.8	2.82	3.2	24.2	905	814	152	13.31
33309	1	2	28	4	2.41	2	2	2	2		2	1	2	2	1.2	1.5	139	1646	61.36	212.05	58.03	11.3	63.22	17.033	22.871	18.224	132	5.05	92	315	519	2229	369	31076	546	1.782	1.298	18.876	1.329	383	207	134.2	1.04	182.5	44	540	1133	260	14.77
33316	1	1	74	3	1.39		1	2	2					1	2.8	2.9	342	1243	37.59	147.29	112.25	4	40.48	18.95	10.369	8.173	127	3.69	398	409	0	141	1	2105	229	0.624	1.401	12.827	0.795	182	52	232.3	5.14	19.9	33.1	766	815	201	6.05
33317	2	2	28	5	5	2	2	2	2		2	1	2	2	2.5	5.1	378	2182	80.09	289.3	186.1	17	80.29	33.529	25.754	15.375	221	5.23	233	339	88	612	1111	1242	1040	1.869	2.536	17.419	1.714	388	86	313.9	6.39	267.8	55.4	1219	1571	332	14.64
33320	1	2	85	2	1.02		1	2	2					2	2.3	2.8	314	1221	48.69	162.77	72.32	10.8	42.24	17.858	14.756	6.526	126	2.04	190	204	4	104	126	1	145	1.046	1.266	10.13	0.691	300	106	183.1	1.13	55.8	21.1	695	793	147	9.75
33321	1	1	63	4	3.41		2	2	2					2	2.7	4.3	194	2418	85.44	270.64	86.78	21.4	79.26	31.947	28.551	10.587	189	6.44	653	889	118	2777	26	18700	2680	2.436	3.015	29.083	3.14	727	461	253.7	8.69	150.6	177.6	1413	1533	314	29.71
33323	1	2	27	3	1.81	1	2	2	2		2	2	2	2	0.9	3.4	180	2511	104.58	268.63	132.69	12.9	116.03	35.369	43.51	27.673	631	10.72	818	918	163	1072	11	835	1687	2.608	3.977	33.056	2.877	561	339	525.4	9.33	103	129.3	1582	1777	259	21.7
33324	1	1	70	1			1	2	2					1	1.9	2.7	230	1423	50.84	241.55	77.27	16.4	31.51	7.342	11.415	9.172	264	3.7	733	794	179	342	625	0	833	2.288	2.637	23.283	1.706	772	599	278.2	5.15	95	20.1	1160	1039	249	24.51
33327	1	1	20	4	5		2	2	2		2	2	2	1	2.3	5.4	378	2345	74.1	312.74	148.88	11.9	90.4	42.471	29.454	12.445	200	4.91	572	658	5	1004	2	8882	1091	1.745	1.912	13.964	0.648	420	246	176.7	3.17	29.8	106.6	1396	1345	185	17.42
33328	2	1	52	3	1.42		2	2	2					1	2.2	2.4	260	1848	49.25	259.79	197.35	2.7	71.57	26.879	27.983	8.163	547	1.86	273	278	10	51	19	10	346	0.848	1.288	10.368	0.577	157	99	326.9	3.21	1.1	6.5	573	993	72	16.07
33330	1	2	35	3	1.14	2	2	2	2	2	2	1	1	1	2.4	5.9	242	1238	49.4	134.82	60.17	5.7	56.33	16.619	19.033	16.284	160	3.02	179	264	281	853	1	0	96	0.872	1.622	18.764	1.236	134	61	148.9	1.19	31.5	68.5	362	841	156	7.35
33331	2	2	56	2	0.65	2	1	2	2					1	2.6	2.9	203	1526	47.23	188.47	139.39	9.3	68.54	33.829	20.812	7.258	230	3.18	423	441	12	172	37	945	69	0.489	1.207	12.885	0.77	104	34	194	1.71	11.8	20.5	541	750	150	5.25
33337	1	2	68	1	1.51		1	2	2					2	2.1	4	210	472	24.06	38.73	2.57	2.1	24.25	12.151	7.305	2.486	116	0.99	140	144	0	48	0	1091	23	0.34	0.375	6.924	0.294	75	55	57.8	0.64	0.2	6.1	251	252	60	3.57
33338	2	2	85	4	1.95		1	2	2					2	1.6	3.1	272	1908	52.41	290.64	161.81	22.2	65.69	22.156	20.163	15.102	147	9.35	229	610	156	4237	471	11392	960	1.424	1.784	17.276	1.72	356	115	226.7	2.2	253.9	133.2	596	958	318	12.15
33344	2	1	27	3	5		2	2	2		2	2	1	2	2.1	3.2	350	2212	86.67	266.7	145.13	7.2	88.98	31.371	28.388	23.022	281	5.73	333	354	4	236	3	4804	474	1.041	1.266	21.268	0.881	252	146	167	1.51	14.5	41.6	940	964	131	11.07
33345	1	2	46	5	1.02	2	2	2	2		2	2	2	1	1.9	7.4	357	1727	168.56	153.33	70.97	17.5	47.83	11.676	17.31	12.945	404	5.78	212	775	3	6689	8	0	14743	0.917	1.834	53.607	3.283	335	0	396.7	3.35	51.3	665.2	1064	1872	448	12.73
33346	2	2	72	3	2.21		1	2	2					1	2.5	4.6	244	1278	54.83	152.59	80.97	7.4	52.77	17.709	19.576	12.268	114	4.48	198	208	7	94	76	272	135	0.622	1.311	13.275	0.744	207	94	167.5	3.1	37.3	12.3	964	897	195	7.7
33347	1	1	45	2	1.39		1	2	2		2	1	2	2	2.9	3.3	261	2292	137.13	296.9	126.75	29.1	62.97	15.444	24.371	16.452	303	5.54	44	79	28	393	18	6849	229	1.549	1.571	36.112	2.504	425	53	450.6	6.93	23.8	40.3	597	1671	399	17.92
33348	2	1	23	1	0.49		1	2	2		2	1	2	1	1.8	4.9	339	1665	50.05	238.49	106.02	23.9	62.55	14.872	23.169	18.292	746	6.79	280	320	7	308	323	1013	1372	0.85	1.313	6.444	1.064	256	33	464.8	2.27	40.2	45.7	491	1260	277	10.19
33356	1	1	70	3	2.8		1	2	2					2	0.9	1.4	96	1889	48.75	119.04	12.5	15.6	106.03	25.158	54.514	18.193	88	10.49	45	77	60	331	15	1167	265	1.455	1.535	19.854	1.578	265	68	267	1.92	61.4	34.2	349	1051	421	9.63
33357	1	2	45	4	2.24	2	2	2	2		2	1	1	2	1.3	5.5	233	696	17.45	86.83	55.39	2	31.68	10.864	11.792	6.491	73	0.86	44	53	6	75	57	1253	92	0.358	0.479	4.923	0.288	93	43	60.8	0.9	25.3	7.7	176	271	53	3.56
33358		2	29	2	2.43	2	1	2	2		2	1	2	2	1.6	4.2	287	1255	47.57	205.84	97.35	21.3	29.1	12.685	7.737	4.521	62	2.34	547	570	1	296	2	2433	217	1.586	2.29	15.507	1.982	709	466	167.5	6.42	38.8	12.6	1112	1311	314	16.13
33360	1	1	28	3	2.61		2	2	2		2	1	2	1	3.6	6.6	283	2697	92.95	327.69	209.14	7.3	56.15	21.651	22.713	6.271	244	2.86	141	156	3	173	5	3760	102	2.785	1.733	30.556	2.732	162	104	289.4	3.64	97.9	13.9	377	1338	184	8.11
33362		2	56	3	4.68	2	2	2	2					2	1.9	2.4	172	1739	105.27	205.79	59.47	24.4	58.11	12.18	19.999	17.259	222	8.1	51	965	2643	9618	46	232	5545	1.591	2.409	41.718	3.051	674	377	341.3	1	36	327.8	542	1377	439	24.71
33363	1	2	57	5	5	2	2	2	2					2	2.2	5.1	302	1581	75.05	186.52	103.6	23.4	67.25	13.488	32.97	16.458	103	10.5	451	689	883	2178	457	2594	1033	1.659	2.16	24.569	2.086	550	286	284.3	4.48	171.4	26.9	1104	1267	444	17.74
33364	1	1	48	1	4.65		1	2	2		2	1	2	1	2.9	8.1	201	2409	63.28	461.75	197.77	26.6	38.89	9.702	13.782	10.943	414	3.75	196	208	3	122	24	454	469	1.679	1.693	17.223	1.412	545	296	331.4	1.34	53.3	23.6	460	1425	304	17.54
33365	1	1	59	1	0.86		1	2	2					1	2.2	3.5	280	2144	137.77	321.98	138.38	33.1	28.14	8.708	9.86	4.732	199	3.5	0	3	17	41	1	75	323	0.967	0.945	29.621	2.784	360	0	531.5	5.27	1.5	28.8	444	1889	407	20.3
33370		2	42	3	5	2	2	2	2		2	1	2	2	3.2	4.1	342	1370	61.24	144.34	58.55	7.8	61.9	26.614	23.93	9.36	157	5.31	223	276	1	583	122	6889	116	1.314	1.707	16.093	1.442	191	96	200.4	5.33	15.3	29.7	652	830	166	9.8
33371	2	2	21	2	1.07	3	2	2	2		2	1	2	2	3.7	4.4	419	3050	145.23	281.06	223.84	6.8	150.59	53.952	58.873	21.395	823	6.73	407	462	39	254	823	12	953	1.346	2.776	19.901	2.38	243	28	704.2	11.68	217.5	39.5	1755	2085	296	18.83
33372	1	2	21	4	5	1	2	2	2		2	1	2	2	1.4	9.5	216	3378	82.37	482.52	274.51	21.6	132.47	60.667	49.132	14.509	213	4.21	574	676	111	590	1142	418	2602	2.422	2.461	22.283	2.477	437	103	345.5	6.13	232	52.6	1803	1537	392	15.92
33374	1	1	42	4	0.82		1	2	2		2	1	2	2	1.8	3.7	302	2529	73.4	322.17	190.16	21.2	107.54	33.184	41.672	24.206	503	8.92	306	507	240	2253	87	18546	1065	1.196	1.773	16.423	1.439	318	110	389.5	3.22	60.8	75.8	788	1188	240	13.53
33375	2	2	31	5	3.42	2	2	2	2		2	1	2	2	1.3	2.7	207	1583	38.3	281.42	142.52	9.3	37.15	11.704	12.154	9.64	42	4.62	184	244	36	291	783	382	798	1.767	1.849	17.881	1.713	688	500	106.2	1.65	286.9	28.7	787	894	195	20.99
33376	1	2	23	4	3.41	2	2	2	2		2	2	2	1	3.3	7.2	322	2867	74.87	210.56	92.4	3.6	61.42	23.798	23.424	8.67	473	3	679	732	183	524	7	0	294	1.03	2.897	30.684	2.525	450	33	848.7	6	1.7	13.2	1341	1944	439	7.09
33379	2	2	24	1	1.24	1	1	2	2		2	1	2	2	2.1	7.5	229	1271	53.3	182.93	75.27	10.2	36.93	11.421	13.439	8.348	140	2.9	95	121	14	243	117	8543	169	1.339	1.306	16.72	0.781	233	149	125.8	0.81	73.1	20.9	461	746	133	9.9
33383	1	1	67	2	1.48		1	2	2					1	2.3	4.8	313	2021	65.19	261.62	82.1	12.5	78.44	30.886	31.665	9.877	186	4.16	642	686	8	455	1	17050	400	2.432	2.975	32.925	1.869	459	349	218.3	3.84	48.3	23	529	865	179	20.9
33385	2	2	64	5	2.22		2	2	2					1	2	1.9	304	1326	57.72	191.31	90.76	23.2	42.6	12.113	15.819	10.399	105	10.31	253	1065	256	9530	162	10228	8738	1.177	1.979	18.903	2.077	532	146	227.9	3.74	145	477.2	828	1009	370	15.75
33387	1	1	50	3	2.94		2	2	2					1	1.9	2.9	242	2929	68.15	328.76	243.45	4.8	126.15	39.897	43.431	34.171	265	11.61	563	717	25	1829	7	20051	1672	0.929	1.854	14.015	1.029	182	70	261.8	4.12	28.6	124.2	735	1076	188	9.81
33390	2	1	46	3	3.46		2	2	2		2	2	1	1	1.6	2.6	230	3385	260.39	356.31	200.21	14	100.34	34.611	42.201	13.817	562	6.16	110	161	221	288	372	0	1205	1.669	2.424	77.557	5.281	544	140	954.5	11.83	85.1	108.5	516	2376	390	24.76
33397	1	1	25	4	0.92		2	2	2		2	2	2	1	1.9	4.4	256	5080	194.18	462.3	130.62	24	266.7	104.326	109.298	39.468	625	14.3	1377	2067	22	8187	212	402	11704	3.496	4.708	35.781	2.184	778	372	559.7	8.76	188	563	2641	2933	543	27.33
33400	2	1	62	4	2.71		2	2	2					2	1.4	3.5	230	3109	194.24	340.27	172.32	39	121.43	29.481	59.893	23.143	254	24.75	569	679	8	1294	51	649	294	2.196	4.137	49.897	5.24	823	410	730.3	16.24	48.1	60.7	1389	3010	1022	27.04
33406	1	2	53	4	5	2	1	2	2					1	2.3	2.9	268	1038	97.6	94.95	38.91	5.6	29.94	15.326	9.29	2.472	185	1.81	453	857	158	4768	2	4110	211	0.626	2.038	18.811	1.345	170	14	274.2	4.28	110.5	25	1009	1286	205	5.47
33409	1	1	21	2	0.93		1	2	2		2	1	2	2	2.2	3.5	288	2005	64.35	361.45	133.79	17.3	31.54	15.898	8.803	3.887	85	1.5	1633	1652	68	173	0	0	260	4.274	5.629	52.038	4.621	1681	1509	225.8	14.55	52.3	6	2029	1609	359	40.83
33412	1	1	29	2	0.41		1	2	2		2	1	2	1	1.1	10.5	220	1980	78.01	318.35	176.76	17.2	48.35	21.056	16.06	6.049	174	2.43	178	401	750	2302	30	5614	587	1.843	1.671	20.047	1.662	212	89	251.3	2.92	50.6	59.9	932	1657	272	12.39
33413	1	2	34	3	3	2	2	2	2		2	2	2	1	1.1	4.1	283	2213	117.7	233.08	69.41	16.8	92.92	22.745	33.938	26.633	189	11.77	651	781	21	1536	4	0	2235	1.481	3.195	38.267	2.25	447	130	393.2	4.92	43	175	1502	2072	479	11.36
33414	1	1	21	1	0.85		2	2	2		2	1	2	1	2.7	2.8	245	2408	88.8	308.05	116.7	22.5	60.14	17.425	21.398	16.479	462	5.27	329	354	62	289	9	6865	350	2.037	3.74	46.2	4.947	315	68	594.2	8.24	40.9	29.8	919	1897	414	10.57
33416	1	1	70	1	1.56		2	2	2					1	2.3	4.8	220	2886	122.7	338.36	197.7	16.9	120.1	39.492	45.787	22.93	357	8.82	1068	1203	448	1421	36	4466	639	2.574	3.828	32.156	3.563	562	368	488.9	12.93	71.1	57.6	1707	2351	452	38.79
33419		2	70	1			1	2	2					2	2.3	3.9	295	1589	49.89	224.48	73.82	23.1	56.7	18.187	20.625	13.775	245	4.48	294	321	20	119	396	0	540	1.397	1.47	7.499	0.944	367	98	257.6	2.04	104.9	49.1	747	1155	289	11.61
33420	2	2	74	5	1.74		2	2	2					2	1.5	3.5	240	1379	69.04	218.23	110.28	27.2	35.74	12.161	12.585	7.216	58	7.43	658	775	6	873	1085	119	1874	3.038	2.821	12.519	1.555	293	55	246.7	7.86	49.2	67.5	1826	1687	378	9.09
33425	1	1	44	3	5		2	2	2		2	1	1	2	2.9	1.9	277	2109	131.66	258.72	136.62	11.4	61.63	15.239	21.497	18.372	319	6.3	47	122	41	246	1211	0	1066	1.744	2.067	33.206	2.533	434	113	351.9	1.96	306.8	32.4	585	1260	342	25.99
33426	2	1	43	4	1.64		2	2	2		2	2	1	1	3.5	4.9	335	1711	41.41	301.56	174.84	16.7	46.35	16.676	11.42	14.427	225	4.16	762	790	33	278	159	0	537	2.117	3.043	18.344	3.064	404	285	276.1	8.14	262.1	46.6	879	1233	326	24.74
33428	1	1	62	1	2.49		1	2	2					1	1.2	2.8	186	1863	95.97	234.59	89.32	10.7	61.46	24.373	19.235	11.73	339	5.65	515	791	1101	2781	1	1555	680	1.32	1.534	33.191	1.373	303	181	317.2	1.61	43.7	74.6	643	1156	277	12.43
33430	1	2	42	5	4.22	2	2	2	2		2	1	1	2	1.4	1.6	255	1385	46.61	213.82	117.3	7.3	41.74	8.354	14.54	13.231	271	5.53	135	195	27	422	561	3055	1133	0.759	0.715	13.967	1.097	221	80	221.7	1.35	133.2	39.2	258	628	194	9
33437	1	1	41	4	0.97		1	2	2		2	1	1	1	2.4	6.9	271	3229	141.99	209.28	68.41	20.9	171.61	55.597	77.667	21.004	1390	12.28	871	983	176	1234	81	3165	1899	2.816	4.416	30.022	2.741	569	94	1045.4	6.72	46.6	119.6	1314	2394	365	13.74
33441	1	2	26	5	5	2	1	2	2		2	2	2	1	2	2.1	334	2631	106.01	272.43	54.59	19.6	107.02	47.23	36.247	15.397	203	7.57	541	641	116	1065	147	1822	1713	1.929	2.681	22.974	1.585	557	272	211.8	4.43	64.5	122	2344	1979	403	15.58
33443	1	1	35	3	1.36		2	2	2		2	2	2	1	2.2	5	246	3037	121.01	288.54	86.97	24.6	111.8	37.728	43.235	18.43	307	10.33	369	721	867	3801	6	50776	518	1.781	2.362	34.574	2.965	591	188	521.6	6.23	126.8	71.2	1525	1852	504	18.48
33445	1	2	27	4	4.25	2	1	2	2		2	1	1	1	2	4.3	289	2094	73.51	239.4	124.38	7.2	95.84	35.419	36.07	18.127	569	4.28	351	385	2	400	12	11379	464	1.243	2.044	16.009	0.863	216	110	360.4	5.26	11.9	58.9	990	1165	165	11.35
33446	1	1	37	5	5		2	2	2		2	1	2	2	1.7	3.5	260	2174	64.95	238.41	64.9	10.6	72.99	24.886	27.8	13.813	136	4.71	1061	1080	11	224	0	11903	304	2.926	3.771	39.96	3.327	1010	821	292.3	12.7	10.2	24	1059	1315	265	40.03
33447	1	2	28	3	1.77	1	1	2	2		2	1	2	2	1.8	5.5	219	2050	71.38	302.14	144.54	35.5	68.22	24.7	27.962	10.97	117	6.89	422	564	209	1507	124	9095	922	1.638	2.504	14.737	2.23	527	166	251.9	5.33	107	83.3	1481	1514	335	17.03
33450	1	1	64	3	5		2	2	2					1	1.2	2.6	290	2413	77.8	361.13	247.06	12	77.17	23.337	26.057	18.189	561	8.62	410	509	52	444	1445	2506	2269	2.42	2.388	17.856	1.928	969	83	499.2	25.65	625.7	44	811	1911	358	15.79
33451	1	2	47	4	0.99	2	2	2	2		2	1	1	2	2	5.2	366	3479	74.95	308.23	118.01	8.5	190.22	85.288	66.226	21.414	813	12.35	1579	1594	2	175	21	4	429	1.364	2.608	28.533	3.442	328	112	476.8	14.54	35.4	49.4	1072	1874	262	20.89
33452	1	1	59	4	5		1	2	2					1	1.9	3.2	171	3333	133.98	402.12	86.26	17.5	129.9	49.72	45.275	24.051	246	8.04	455	496	0	489	2	25862	194	3.715	4.122	35.253	1.309	629	379	287	5.24	24.7	60.5	2014	2203	314	25.46
33454	1	1	84	2	1.12		2	2	2					1	1.3	2.8	247	1535	68.31	216.79	111.85	20.7	45.79	19.151	18.36	2.956	144	6.11	197	279	52	883	159	23308	525	1.013	1.801	19.76	1.721	338	221	278.7	6.26	188.6	37.8	542	935	255	19.23
33457	1	1	62	1			1	2	2					1	2.3	3.7	202	2318	190.3	304.62	156.94	25.6	38.75	8.191	10.965	13.306	399	7.82	136	190	72	530	48	1756	226	0.906	1.275	45.059	3.577	121	0	520.4	4.23	209.4	24.3	608	2484	608	13.44
33464	2	1	46	2	1.2		1	2	2		2	1	2	2	2.4	4.2	299	1535	69.2	252.6	128.82	21.8	31.76	8.148	10.649	8.286	191	3.71	37	227	673	1883	73	6321	550	0.784	2.513	43.803	4.448	137	20	253.2	6.06	125.9	59.3	345	982	280	8.97
33467	1	1	60	3	3.31		2	2	2					2	1.5	6.5	454	1831	139.7	243.77	137.67	31.5	38.42	9.013	10.322	12.445	256	10.11	1194	1629	1129	4567	136	2788	2413	2.115	4.027	51.523	4.129	436	146	528.9	6.9	189.6	220.5	1661	2203	430	22.7
33468	1	1	22	3			2	2	2		2	2	1	1	2	3.5	297	4454	126.61	615.4	357.97	15.1	170.21	61.526	58.292	38.654	288	9.84	1413	1456	24	480	7	10908	209	3.753	4.221	43.005	2.732	663	525	299.4	10.05	60.7	60.6	2009	2178	258	35
33469	1	2	46	4	5	2	2	2	2		2	1	2	2	1.9	3.9	351	1360	122.01	88.39	39.85	18.3	57.6	12.694	19.533	18.874	388	8.38	189	911	1438	7902	150	7324	676	1.01	1.718	31.529	2.399	505	7	506	4.76	34.1	739.8	466	1226	320	14.53
33476	1	1	49	5	5		2	2	2		2	2	2	2	2.6	5.6	222	1802	49.08	218.03	101.26	11.4	87.57	21.043	31.291	30.738	108	9.71	52	70	0	182	4	5961	126	0.853	0.911	20.286	0.799	254	136	200.6	1.36	16.7	71.6	462	787	241	10.6
33477	2	1	29	4	2.51		1	2	2		2	1	2	1	2.2	3.7	239	2669	158.36	230.03	93.04	7.2	121.05	44.668	42.817	23.359	514	5.26	367	393	0	262	0	10996	181	1.863	2.779	34.804	1.669	316	189	310.1	6.11	67.5	51.8	1712	1843	270	17.14
33478	2	2	70	5	5		1	2	2					2	6.5	4.2	412	1678	47.58	200.76	93.75	13.2	79.66	30.663	30.311	13.19	126	6.66	282	485	597	2121	3	16020	516	1.139	1.647	14.912	0.933	279	135	143.3	1.44	36.4	64.2	640	902	223	9.12
33483	2	2	60	2	2.26		1	2	2					2	1.4	3.5	267	927	53.24	96.25	38.39	11.1	36.2	9.141	15.191	8.376	320	4.36	263	874	184	7246	52	0	737	0.772	0.978	12.111	0.95	256	170	256.4	1.21	128.8	71.6	285	549	129	6.35
33485	2	2	44	1	2.07	2	1	2	2		2	1	2	2	1.6	3.3	283	994	42.64	94.59	42.01	19.3	53.16	12.699	28.46	8.223	132	5.54	184	209	74	250	58	0	635	0.374	0.97	13.632	1.338	225	2	148.7	0.44	33.4	57.5	176	468	162	4.79
33487	1	1	39	3	0.51		2	2	2		2	1	2	1	1.9	5.1	254	3621	128.26	366.54	223.17	19.1	168.58	63.247	59.125	26.751	408	7.34	483	610	176	1428	97	12589	691	1.57	3.309	28.838	1.826	421	87	497.4	8.34	42.5	70.9	1735	2273	399	15.89
33489	2	2	32	5	5	2	2	1	2		2	2	2	1	2.5	3.7	268	2587	56.14	292.63	107.6	13.9	104.12	39.201	33.476	24.101	178	9.6	534	680	127	1701	8	731	2003	1.905	1.826	19.251	1.131	526	313	160.3	1.95	86.5	145.4	987	1064	266	19.15
33492	1	1	45	3	3.37		1	2	2		2	1	1	2	1.5	4.4	316	3655	110.73	313.79	128.41	14.9	82.86	27.032	32.291	16.162	304	6.34	42	143	47	1189	23	36908	358	1.464	2.283	38.704	2.801	513	191	564.8	9.57	37.1	75.2	713	1311	411	22.75
33496		2	50	5	5	2	2	2	2					2	3.3	6	400	1611	94.95	136.48	30.34	6.2	73.36	23.274	29.784	11.614	388	3.36	108	136	31	320	9	1952	618	0.953	1.001	29.093	1.451	242	170	310.8	5.81	82.5	25.7	500	1040	212	11.84
33500	1	1	53	2	2.71		2	2	2					2	1.9	4.1	308	1370	40.42	132.87	30.04	5.4	58.13	15.969	23.785	12.726	401	3.45	297	307	0	128	8	0	322	0.964	1.296	10.321	0.639	267	160	320.7	1.85	0.2	27.7	419	671	134	7.65
33509	1	1	32	5	2.72		1	2	2		1	1	1	1	1.7	2.7	216	2254	189.18	39.93	22.13	7.6	122.78	36.222	48.062	24.06	1399	10.85	401	888	732	5468	36	13	5070	2.09	2.826	45.183	2.795	366	0	1062.7	7.21	30.1	311.4	551	1938	332	15.44
33517	1	1	71	1	1.84									1	2.2	5.9	182	2598	133.9	285.84	138.57	19.9	84.43	37.805	32.639	14.894	288	7.02	544	718	115	1993	150	16018	2298	2.358	4.643	46.891	5.012	544	285	613.7	14.88	552.5	53.6	823	1901	454	35.04
33518	1	1	20	3	1.71		2	2	2		2	2	2	1	2.4	3.7	263	4136	182.94	470.24	202.33	18.2	153.45	62.713	53.481	26.614	380	9.98	811	865	10	652	5	29065	293	4.133	4.97	42.647	2.399	607	293	551.6	8.72	45.8	60.7	2949	3296	455	24.96
33520	1	1	74	5	2.46		1	2	2					2	1.9	5.5	256	1061	46.42	122.14	52.81	7	43.7	18.533	15.283	5.181	442	2.96	199	559	1113	3755	8	828	589	0.533	0.989	12.414	0.52	170	78	284.6	1.89	12.6	25.2	255	544	122	8.79
33527	1	1	63	3	1.92		2	2	2					2	1.7	4.2	231	4616	211.86	574.73	370.87	22	163.49	75.912	52.709	17.013	624	13.91	855	998	98	1754	5	27215	774	2.945	7.108	52.22	3.693	570	255	829.9	14.46	39.8	189.7	3048	3399	613	23.6
33529	1	2	30	2	1.77	2	2	2	2		2	1	1	1	2.4	5.8	250	3219	58.16	343.66	136.43	2	50.43	20.49	16.729	9.193	121	1.92	56	61	4	54	3	0	25	0.941	2.945	36.353	2.466	383	68	590.1	1.22	0.2	13.8	278	1032	360	6.34
33530	1	2	56	3	4.29	2	2	2	2					2	1.5	2.3	240	2088	152.83	126.2	62.98	14.4	112.41	34.465	34.26	37.574	292	8.01	191	321	31	1548	4	757	1788	1.635	1.744	38.208	2.825	506	37	541.6	6.56	44.1	142.9	1169	2003	378	15.6
33531	1	1	82	4	3.24		2	2	2					2	1.6	4.7	198	1434	54.49	144.08	40.68	7.3	42.34	12.86	18.676	7.787	475	4.25	189	316	56	1488	17	2816	2937	1.149	1.595	15.753	0.927	279	127	380.4	5	24.1	121.8	312	682	151	10.99
33532	1	2	38	4	2.56	2	2	2	2		2	2	1	2	1.8	2.5	370	1704	52.08	247.92	123.89	11.3	59.71	15.703	27.991	11.907	122	3.1	133	159	22	193	193	2775	313	0.696	1.274	15.533	1.101	228	142	173.3	1.75	82.9	23.4	631	768	220	8.16
33534	1	1	78	1	1.21		2	2	2					1	1.6	3	202	1105	68.34	160.13	84.05	13.5	23.59	8.387	8.786	3.415	94	8.07	811	923	56	1303	55	772	2079	1.687	2.811	20.542	3.809	690	532	256.4	13.85	79.7	35.4	1136	1315	223	17.29
33536	1	1	22	4	5		1	2	2		2	1	2	2	1.2	2	208	6090	316.34	432.4	81.44	17.5	285.54	105.154	114.048	34.195	1196	10.09	426	468	80	513	6	4914	575	5.266	6.321	87.048	4.905	943	518	1255.5	20.77	16.5	50.2	2035	3854	567	42.77
33541	1	2	28	5	5	1	2	2	2		2	2	2	2	1.8	6.1	202	1898	77.57	292.75	127	30.9	56.5	14.779	18.729	15.456	215	10.1	707	1062	65	4210	54	29559	4684	2.084	3.458	23.973	2.399	684	312	361.1	7.95	177.2	307.7	1315	1652	401	24.4
33543	1	1	76	3	3.41		1	2	2					2	1	3.8	356	1444	65.94	164.64	81.71	10.7	59.77	24.434	21.786	7.368	202	4.16	373	420	41	414	229	1850	466	1.268	1.91	21.557	1.709	446	290	236.6	6.49	102.7	25.4	838	856	207	14.12
33544	1	2	38	5	5	2	2	2	2		2	2	2	2	2.8	5.2	287	1660	53.03	230.73	120.48	22.3	64.27	18.778	29.636	12.691	92	7.86	185	256	107	778	31	5485	693	1.06	1.904	14.425	1.508	436	126	196.3	3.26	70.2	70.8	1327	1136	372	8.92
33546	1	2	29	2	4.5	2	2	2	2		2	2	2	1	2.4	4.6	243	1622	73.62	212.52	114.06	12.9	54.2	19.48	21.674	6.811	170	2.94	7	114	363	1099	18	4633	184	1.148	1.165	20.193	1.383	138	0	242.8	1.39	154.1	54.7	244	772	193	9.09
33551	1	1	76	5			1	2	2					1	1.2	5	149	1826	65.2	208.51	56.64	25	91.68	28.992	36.902	19.221	190	8.37	311	331	91	174	16	0	2590	1.336	1.862	23.456	2.011	420	119	281.5	4.1	39.5	18.4	691	1310	401	21.34
33552	1	2	67	1	0.39		1	2	2					2	2.1	3.5	287	776	32.54	131.98	53.35	14.7	16.66	3.001	5.286	6.805	43	7.03	132	674	52	6390	261	0	631	0.775	0.641	14.553	1.897	340	112	165.7	3.14	136.1	199.9	418	497	179	7.31
33554	1	1	39	3	2.65		2	2	2		2	1	1	1	2.2	3	339	2157	70.84	264.77	118.99	10	92.33	37.423	28.339	18.155	546	5.75	477	483	18	80	8	0	676	1.12	1.895	13.088	1.081	301	159	384.7	4.93	94.4	17	913	1221	220	11.19
33559		2	24	4	1.17	2	2	2	2		2	2	1	1	2	2.3	356	2268	62.05	159.84	39.59	4.9	51.37	15.528	16.546	13.945	213	2.95	77	119	67	448	64	1029	327	0.84	1.344	25.38	2.192	397	116	488.7	4.58	44.3	47.7	749	1009	356	9.53
33561	2	2	83	3	1.21		1	2	2					2	2.1	4.8	252	1913	82.45	204.74	107.62	7.4	87.22	35.95	29.966	14.701	231	3.12	781	807	22	322	5	3856	161	1.144	3.097	13.832	1.02	274	134	324.4	7.25	9.3	28.1	1697	1610	262	11.5
33562		2	48	5	5	2	1	2	2		2	2	2	1	2.2	4.3	369	1368	53.26	187.51	88.24	17	47.52	15.25	17.004	11.237	104	7.52	187	430	127	2615	497	2624	3237	1.546	1.514	10.253	1.389	494	118	267.1	4.22	251.4	291.8	1202	1058	277	8.83
33563	2	2	54	3	3.01	2	2	2	2					2	3	4.4	328	2461	123.68	239.44	91.02	22.4	113.84	38.667	49.126	11.965	982	4.4	559	887	1027	3373	96	2755	3088	1.796	3.182	27.272	2.854	388	99	743.4	7.48	59.4	56.7	663	1980	342	20.9
33565	1	1	57	3	1.44		1	2	2					1	2	4.7	295	3797	79.04	519.54	307.03	9.9	159.09	51.022	71.647	24.869	312	9.71	244	254	2	127	7	1110	219	1.972	2.494	21.766	0.915	476	311	340.7	4.87	9.2	53.3	803	1996	215	20.46
33566		1	82	2	1.37		2	2	2					2	1.7	4.5	137	1289	38.94	200.77	112.85	8.2	30.87	11.078	10.858	6.451	125	2.95	893	918	43	141	1	0	348	1.573	2.289	25.79	2.902	367	267	198.1	7.49	60	18.1	461	726	165	17
33569	2	2	79	3	2.61		2	2	2					2	1.4	4.6	290	1433	36.44	170.97	64.76	16	71.61	20.618	22.956	23.47	50	9.21	478	547	26	719	229	0	1315	1.298	1.372	12.687	1.718	273	160	138	4.05	64.4	58.3	546	644	212	9.14
33570	2	2	44	3	5	2					2			1	4	7.9	268	1425	48.48	197.83	152.27	6.1	50.53	25.096	17.055	4.384	139	1.88	193	200	3	84	4	726	46	0.447	1.04	9.599	0.541	121	48	108.8	1.72	3.7	19.1	670	824	113	5.52
33574	1	1	24	2	1.93		2	2	2		2	2	2	1	3.6	5.9	201	1829	60.14	250.2	91.67	8.4	67.62	23.339	26.392	13.251	275	10.41	196	205	0	111	4	2506	185	1.943	1.486	34.646	3.314	321	238	226.2	1.48	50.1	19.7	680	982	134	11.38
33576	2	2	68	3	2.68		2	2	2					2	2.1	3.5	228	2271	120.79	273.61	169.23	18.1	81.18	19.461	22.445	32.504	176	4.37	668	722	71	370	485	2508	844	1.529	3.01	16.561	2.245	404	125	395	9.85	127.2	49	1702	1824	402	18.57
33577	1	2	55	4	0.63	2	2	2	2					1	1.5	5.4	296	1196	69.84	125.71	41.69	8.7	45.91	10.383	14.736	15.851	225	4.67	75	201	491	1281	9	0	524	0.568	1.139	19.031	1.582	238	55	238.5	3.37	43.7	56.3	249	937	184	8.86
33582	1	2	21	3	1.02	1	2	2	2		2	1	2	1	1.6	8.2	219	1166	55.78	126.56	75.04	3.3	48.36	17.585	19.33	8.465	153	2.03	306	315	0	115	0	2506	32	1.085	1.491	13.721	0.867	101	41	196.4	3.22	5	14.8	864	1109	160	4.02
33585	1	1	50	4	0.87		1	2	2	1				1	2.2	5.2	486	5057	144.46	813.77	645.13	29.7	154.15	65.925	53.493	22.101	493	11.31	722	1015	329	2314	2001	557	6352	3.37	3.863	38.376	3.595	1335	86	733.8	7.08	953	402	1383	2234	668	24.14
33587	1	2	45	4	3.21	2	1	2	2		2	1	2	1	2	3	456	1599	94.9	125.26	22.85	6.3	77.53	24.668	28.77	17.636	509	5.79	319	350	8	357	11	3492	635	1.238	1.864	25.048	1.267	248	128	348.3	2.2	39.4	41	554	1018	156	10.44
33589	1	2	20	4	0.83	2	1	2	2		2	1	2	1	1.7	5.1	293	4320	139.32	562.5	380.21	24.6	177.05	75.879	55.321	31.026	488	12.38	1057	1350	857	3073	222	389	1118	2.341	5.284	26.095	2.362	410	128	543.1	9.45	339.6	86.5	2914	3230	631	18.34
33591	2	2	65	5	2.3		1	2	2	2				2	1.1	1.7	223	1026	46.51	150.39	54.52	10.1	28.28	6.566	11.21	7.841	69	4.5	83	127	8	532	17	0	912	0.924	1.04	15.767	0.78	139	10	156.6	2.15	21	56.1	481	701	233	8.42
33592	1	1	62	3	5		1	2	2					1	1.5	1.8	235	3248	227.3	292.27	151.44	29.6	134.17	41.639	57.299	22.65	630	11.47	247	389	65	1465	430	289	3059	1.78	2.74	38.738	3.544	402	71	833.5	14.83	103	116.1	593	2309	499	30.57
33594	1	1	75	5	3.75		1	2	2					2	1.3	4.9	341	2799	78.23	420.05	195.56	28.1	85.87	30.443	25.991	22.143	277	6.64	1240	1359	344	974	449	3	965	3.175	4.585	37.218	4.995	843	609	318.4	12.38	247.2	78	1329	1974	463	42.36
33596	1	2	32	1	0.53	1	2	2	2		2	1	1	1	2.9	5.6	216	1228	55.71	158.23	60.25	7.4	41.92	10.22	11.384	16.894	64	4.82	85	163	66	505	764	6768	874	1.159	0.996	24.656	1.264	288	137	105.4	3.9	176.6	56.6	523	643	145	11.54
33604	2	2	59	2	2.27	2	1	2	2					1	2.5	5.3	256	2317	94.94	288.2	138.59	15.1	87.56	29.327	29.727	21.002	234	4.98	176	368	729	1931	0	188	1098	1.379	2.915	31.47	1.5	356	150	311.4	3.52	9.2	56	850	1416	267	15.66
33605	2	2	68	4	1.22		1	2	2					2	1.3	5.7	252	1101	43.93	137.54	65.75	4.6	42.1	14.429	15.582	9.629	86	2.35	463	480	16	202	0	407	92	0.796	1.588	7.887	0.527	165	104	161.8	2.57	5.6	26.4	1092	919	177	10.85
33606	2	2	31	3	1.62	2	2	2	2		2	1	1	2	0.8	3.9	142	1786	66.76	207.29	53.1	9.8	76.24	22.057	31.31	15.931	140	5.28	128	209	36	944	11	655	1546	1.327	1.089	22.285	1.242	322	220	201.1	2.74	58.3	74.2	470	806	173	14.46
33607	2	2	27	4	1.95	1	2	2	2		2	2	2	2	1.1	6.2	213	805	44.14	102.14	28.4	3.5	24.1	7.703	8.964	5.342	86	1.33	326	341	10	74	1	3231	275	1.303	1.474	22.161	1.47	252	200	107.4	4.09	11	9.7	696	555	122	12.51
33608	1	1	39	5	5		2	2	2					2	2.5	3.4	215	3616	69.69	635.31	421.98	12.3	94.74	29.5	34.896	23.859	342	7.28	191	241	16	399	326	12185	839	2.366	1.99	21.098	1.195	526	251	322.9	2.09	174.8	79.2	853	1577	183	19.67
33612	1	1	35	5	5		2	2	2		2	1	2	2	2.3	4.8	323	3577	123.68	345.11	106.56	22.8	192.1	63.359	83.028	31.146	411	12.72	940	1322	285	4437	32	5543	3975	4.559	4.712	47.788	3.95	1011	559	624.7	10.54	143.6	337.4	1275	2051	392	33.7
33614	1	2	65	3	3.79		1	2	2					2	4.5	5.9	393	1382	61.33	212.14	102.32	24.5	36.51	8.44	12.054	11.949	115	6.54	130	230	47	1161	26	1159	1527	0.963	1.526	17.175	1.469	273	66	333.5	3.72	42	119.6	567	1106	198	9.93
33616	1	1	48	3	5		1	2	2		2	1	1	1	2.3	3.5	185	3223	147.14	231.77	124.65	13.1	133.44	44.001	56.844	19.865	869	7.82	233	815	63	6690	494	1162	12369	2.132	2.66	34.969	2.247	430	125	670.7	8.13	178.8	560	1219	1663	412	27.74
33617	1	1	48	3	4.68		2	2	2		2	2	2	1	2.2	4.3	213	3446	111.43	290.94	104.1	13.5	137.22	57.781	51.991	18.524	718	5.39	636	669	4	385	19	6730	484	1.673	2.615	23.71	1.77	299	139	438.8	3.66	17.5	48.4	1379	1823	237	17.14
33620		2	49	5	5	2	2	2	2		2	1	2	1	1.5	4.1	258	1466	64.64	141.48	64.73	10.2	62.06	25.332	22.686	8.375	415	4.54	603	623	8	275	4	0	663	1.264	2.235	17.745	1.632	292	157	355.2	6.27	13.8	40.4	589	1111	237	14.19
33621	1	1	63	5	4.68		2	2	2					1	1.7	3.5	274	1813	132.25	157	41.55	11.3	72.87	30.716	27.328	9.128	333	4.34	460	494	23	319	122	3657	794	4.225	3.328	30.048	2.881	325	177	491.1	6.91	24.5	25	837	1647	251	14.34
33625	2	2	81	3	1.56		1	2	2					2	1.1	2.2	180	1104	30.64	170.33	82.96	11.5	36.31	17.179	11.029	5.354	105	12.83	473	519	36	456	1	2507	675	1.863	2.654	23.112	2.457	482	385	138.7	6.63	33.1	22.3	702	696	162	18.43
33627	1	1	46	5	5		2	2	2		2	2	2	2	1.7	2.6	268	1614	50.54	182.79	84.15	8.6	47.7	20.883	15.539	7.302	164	2.55	200	344	519	1454	34	0	435	0.81	1.099	19.016	1.07	240	139	167	1.86	52.6	44.1	470	707	244	8
33629	1	2	34	3	3.62	2	2	2	2		2	2	2	1	3.2	5.1	317	1909	71.6	214.84	89.22	8.7	66.5	22.437	23.776	12.524	173	4.64	563	716	394	1631	44	9	1231	1.7	2.786	21.267	1.531	305	155	310.3	3.48	14.8	68.5	713	1043	219	12.95
33630	1	2	36	2	0.34	2	2	2	2		2	2	1	1	4.9	5	165	3075	135.06	344.75	235.57	7.2	130.14	46.11	41.197	31.22	451	7.11	460	508	46	547	1	9887	227	1.036	1.75	31.6	1.872	221	107	260.9	4.91	11.3	64.8	1489	1713	224	14.62
33632	1	2	26	2	0.4	1	1	2	2		2	2	2	2	2	4.7	205	2536	85.42	364.03	207.01	21	88.28	39.286	24.389	16.598	211	4.41	374	410	60	350	153	358	408	1.636	2.07	23.334	1.723	375	225	269.2	3.1	121.5	28.6	1283	1457	350	12.42
33634	1	1	50	4	1.53		2	2	2					1	2.6	8.2	273	2235	115.56	205.55	17.1	17.1	107.35	24.029	43.552	32.115	288	6.61	266	281	0	140	0	0	235	1.574	1.887	39.541	1.629	257	134	267.8	1.33	4.7	53.2	545	1462	381	15.35
33635	1	1	44	3	5		2	2	2		2			1	2.9	6.8	237	2931	109.85	307.57	125	17.9	142.69	44.283	60.415	29.368	261	9.85	128	164	11	373	14	5255	448	2.586	3.077	40.042	2.005	471	270	364.1	5.46	36.4	48	812	1350	348	24.1
33637	1	2	28	4	3.25	2	2	2	2		2	1	2	1	2.8	5.3	350	2515	45.43	327.7	239.1	11.7	56.81	16.854	16.636	17.301	96	6.82	78	109	48	325	1	1204	303	0.736	0.914	17.515	1.208	212	78	136.4	0.82	119.1	58.9	580	675	186	7.59
33642	1	2	77	4	3.56		1	2	2					1	2.8	8.2	339	1423	57.59	143.44	89.49	3.7	58.66	19.661	22.013	12.021	337	4.48	189	225	34	258	306	585	509	0.633	1.197	16.316	1.347	161	27	341.9	2.9	94.1	37.5	502	719	148	7.04
33643	1	2	41	4	1.33	2	2	2	2		2	2	2	2	1.6	6.1	219	1386	102.21	171.81	75.28	10.1	31.89	10.062	12.498	4.91	198	2.55	326	368	63	489	0	6043	241	1.169	2.138	27.668	1.93	229	93	371.3	6.48	33.4	27.9	1204	1583	276	11.69
33645	2	2	25	4	4.22	2	2	2	2		2			2	2.4	5.5	294	1360	49.91	190.3	105.19	12.6	48.88	12.184	18.651	13.723	76	6.23	42	142	148	1109	10	4356	735	0.961	0.903	19.125	1.271	257	57	179.6	0.51	62.8	75.6	313	686	216	7.94
33647	1	1	35	5	2.35		2	2	2		2	1	1	1	1.8	2.3	313	2310	71.88	352.63	143.34	19.2	69.86	21.372	30.812	14.032	118	7.57	46	102	67	649	4	11341	262	1.983	1.443	30.188	1.594	349	217	195.5	3.44	20.5	73.3	507	1109	231	14.25
33649		1	85	3			1	2	2					2	1	3.9	153	2475	67.17	232.19	100.93	15.9	109.32	41.756	38.887	20.641	388	10.19	525	609	21	943	9	13978	933	1.197	2.334	20.331	1.678	331	127	371.1	3.53	83.8	111.6	666	1154	239	13.46
33652	1	1	32	3	2.14		2	2	2		2	2	2	2	2.2	2.6	248	1939	78.52	211	107.04	8.7	87.36	25.586	33.453	23.594	164	4.79	764	814	78	371	107	136	866	1.957	3.883	62.775	5.02	378	277	198.9	16.98	47.7	79.9	544	921	186	23.35
33657	2	2	23	3	0.16	2	2	2	2		2	1	1	2	2.2	5.3	362	629	30.18	87.78	33.1	2.4	17.69	4.043	7.558	4.853	70	1.63	110	118	0	88	0	0	11	0.476	0.494	8.351	0.441	175	112	89.8	1.66	0.4	14.9	147	277	92	5.29
33658	1	2	41	5	1.63	2	2	2	2		2	2	2	1	1.6	3.2	287	2651	63.32	280	65.05	26.6	96.41	37.133	37.735	21.947	100	8.44	335	386	60	581	14	4292	490	1.808	1.71	17.207	1.122	569	295	219.6	1.44	14.6	75.1	929	1171	334	22.21
33659	2	2	35	3	1.03	2	2	2	2		2	1	1	2	1.4	3	425	3522	117.05	414.59	205.63	14.3	161.12	39.754	72.81	32.392	677	7.95	476	537	141	677	28	5525	548	2.907	2.814	28.875	2.179	536	262	581.8	3.51	69.2	105	510	1841	523	22.56
33660	1	2	59	5	5	2	2	2	2					2	1.4	3	198	1312	39.93	187.77	81.45	28.1	38.87	8.52	12.745	15.815	91	9.04	89	1035	1326	10569	220	0	9416	0.912	1.12	14.207	1.566	430	38	235.1	0.46	381.7	766.9	559	795	342	10.52
33662	1	2	45	5	1.82	2	2	2	2		2	2	2	1	1.9	6.7	351	2709	96.41	172.97	109.09	15.8	146.54	53.84	46.94	34.663	317	13.14	483	922	534	4996	34	12282	8796	1.053	2.462	17.154	2.324	329	0	378	4.89	118.9	390.3	1694	1765	419	11.43
33663	2	1	76	5	1.29		1	2	2					2	1.9	3.8	255	2683	124.64	299.79	214.5	23.7	115.84	52.316	32.005	24.543	332	7.14	1460	1677	449	2418	17	3189	1051	1.426	4.845	17.356	2.517	259	17	518.1	9.95	92.1	123.3	3165	2949	443	8.21
33666	1	1	71	4	3.41		2	2	2					1	0.9	5.2	184	3339	112.87	383.04	161.51	23.7	149.74	52.674	53.821	32.849	455	7.78	369	559	277	1681	913	5823	1455	2.803	2.789	32.018	1.826	793	397	403	6.89	294.6	84.1	1107	1392	312	24.22
33667	1	1	79	2	2.61		1	2	2					1	1.7	4.2	196	1567	49.59	199.21	59.2	20.9	65.33	21.295	24.705	14.195	94	5.08	245	285	28	329	304	0	386	1.113	0.961	13.631	0.925	270	25	147	1.67	141.1	36.7	720	961	276	8.48
33668	1	2	48	4	3.48	2	1	2	2		2	2	1	1	2.5	2.4	335	2033	79.51	198.42	95.48	8.3	104.01	33.748	38.178	20.647	409	6.95	571	659	114	942	75	7205	629	1.204	2.07	22.418	1.942	257	128	339.4	7.26	19.6	85.1	860	1309	188	15.16
33669	1	1	46	5	5		2	2	2		2	2	2	2	2	4.4	152	2270	134.19	294.77	121.72	20.5	67.01	25.051	24.713	9.499	318	7.38	544	669	104	1115	652	28581	1932	2.236	3.235	34.521	3.307	673	324	509.2	9.9	256	34.1	2030	1815	460	24.52
33673	1	1	85	4	1.19		1	2	2					1	0.9	3.3	198	819	23.13	127.21	45.54	9.7	23.96	12.773	5.271	3.676	52	4.91	122	166	53	507	0	9386	105	0.754	0.962	11.539	0.55	202	130	79.8	0.5	4.4	29.7	260	408	128	4.85
33675	1	2	56	4	1.6	2	2	2	2					2	1.9	6.2	432	1298	41.8	192.45	77.76	13.5	43.21	10.503	13.912	14.518	42	12.13	149	1110	12	11527	0	28285	17185	0.937	1.338	13.684	1.308	461	158	120.8	2.39	98.7	905.5	894	771	234	10.98
33681	1	1	29	5	5		2	2	2		2	1	2	2	2.3	3	338	4184	128.3	458.86	124.83	15.8	124.29	43.407	45.686	27.024	300	8.13	343	374	0	369	0	16804	134	2.594	2.663	47.444	3.305	524	273	440.8	4.03	42.7	62.2	1195	1912	398	19.97
33682	1	2	38	5	5	2	2	2	2		2	2	2	2	1.3	4.3	235	2440	88.62	241.7	93.99	12.7	126.85	49.855	45.834	23.366	607	6.44	571	611	22	250	440	0	822	1.609	2.551	26.962	2.422	640	446	368	3.04	162	38.4	1741	1717	253	22.54
33684	1	1	74	3	2.61		2	2	2					2	1.7	4	269	1217	41.12	162.35	70.57	19.7	48.83	16.877	16.364	11.641	135	5.5	213	274	30	719	5	0	2837	0.919	1.008	10.873	1.704	181	26	191.9	3.6	64.3	80.7	256	549	152	7.21
33687	2	2	53	1	0.74	2	1	2	2					2	1.7	3.7	223	1441	67.61	194.16	62.76	9.3	43.63	15.152	15.622	9.435	154	3.35	662	687	6	251	4	7526	292	2.136	2.56	28.002	2.381	543	449	196.8	6.44	38.2	49.4	848	937	201	21.48
33688	1	1	76	3	2.34		2	2	2					1	1.1	4.4	320	2468	112.28	305.95	115.56	29.1	85.95	18.191	36.951	23.119	154	12.91	453	771	130	3689	134	2697	784	2.437	3.71	49.673	4.136	727	364	463.8	7.03	110.1	89	580	1450	508	25.14
33690	2	2	27	3	1.62	2	2	2	2		2	2	2	2	2.1	2.9	307	1512	37.2	192.44	64.04	17.2	67.98	13.252	31.218	16.806	609	4.84	296	307	24	110	40	0	826	1.016	1.475	12.171	1.679	229	55	407.6	1.72	68.4	45.4	381	933	240	8.51
33694	1	1	54	3	2.42		2	2	2					2	1.7	2.4	162	2193	106.3	230.57	116.65	13.6	95.58	32.469	34.444	16.602	309	4.48	50	80	81	278	113	0	442	1.427	1.785	29.161	2.005	264	138	361.3	8.42	17.4	54.4	412	1108	230	15.51
33696	2	1	61	3	2.49		2	2	2					1	2	6.8	306	1850	87.21	259.43	104.49	18.4	55.99	22.49	16.337	13.027	169	6.36	793	935	355	1488	105	14611	553	2.6	4.109	44.611	2.356	857	562	303.5	8.8	62	61.1	1209	1570	385	29.19
33698	1	1	75	1	1.21		1	2	2					2	1.3	3.8	195	1765	80.55	200.53	123.13	9.5	73.66	25.266	30.836	13.474	308	5.58	665	708	5	453	125	2	381	0.822	1.401	27.938	1.736	142	31	280.5	3.54	20.5	44.1	632	1206	179	7.11
33699	2	1	37	5	5		2	2	2		1	2	1	2	2.5	3.2	286	2828	116.69	314.32	163.02	26.9	129.96	35.894	65.996	20.217	247	16.85	61	114	32	482	322	2774	451	1.343	1.466	21.418	1.934	275	43	401.8	3.32	84	48	780	1741	606	20.83
33700	1	1	29	5	1.55		1	2	2		2	1	2	2	2.7	3.8	246	1781	105	176.07	48.85	8.9	72.64	17.982	23.972	23.589	244	6.21	96	450	1245	3595	81	1544	1040	1.293	1.255	29.291	1.902	388	190	299.8	2.22	146.2	136.9	584	863	245	12.87
33709	1	1	53	4	2.61		2	2	2					1	3.3	7.8	330	3459	132.89	485.98	300	26.4	115.03	43.403	35.096	25.731	324	8.85	965	1260	1094	2997	118	4561	671	2.259	3.889	46.11	3.607	491	263	398.2	8.54	77.8	162.6	1708	2137	556	23.83
33711	1	1	20	3	5		1	2	2		2	2	2	1	2	4.5	369	5547	204.41	581.52	210.87	31.4	141.09	41.52	58.697	26.296	466	16.78	106	222	159	1205	216	3492	688	1.495	2.928	67.321	5.645	534	75	1030.3	11.58	136.2	66.8	788	2982	779	26.98
33712	2	2	23	4	1.56	2	2	2	2		2	2	2	2	2.2	3.7	310	2205	82.32	341.17	61.26	32.6	61.37	10.617	20.75	17.753	55	20.91	336	506	559	1717	40	10511	478	2.118	2.088	53.216	5.138	907	559	222.4	2.72	80.7	59.4	747	1304	469	32.64
33713	1	1	62	5	5		2	2	2					1	1.5	5.1	257	2910	104.14	434.85	269.24	27.1	92.42	24.548	32.808	27.365	164	15.92	103	276	158	630	2672	0	2173	2.223	1.997	40.803	4.443	615	76	375	1.46	655	26.8	828	1866	665	25.16
33715	2	2	45	5	2.33	2	2	2	2		2	1	2	2	2.1	2.1	264	504	14.06	93.71	52.1	5	10.52	4.372	3.416	1.404	20	0.63	397	434	0	414	104	6028	81	1.028	1.398	9.56	0.841	435	397	60.8	3.31	20.4	2.8	486	436	112	14.08
33726	1	1	66	1	0.94		1	2	2					2	2	4.5	356	2247	103.15	227.47	157.45	12.3	105.58	33.366	36.794	25.579	1717	9.51	991	1024	43	371	36	7862	1329	1.089	3.758	9.685	2.004	293	37	1048.6	8.08	32.4	44.5	1482	1997	340	12.15
33727	2	2	57	4	2.1	2	1	2	2					2	1.7	3.7	373	1362	58.78	131.8	31.45	13.6	71.81	23.311	28.425	15.713	73	11.31	165	546	967	4088	11	8257	2460	0.692	0.939	16.758	0.886	279	89	136.5	0.69	26.6	134.9	1011	985	289	7.73
33728	2	1	34	3	4.39		2	2	2		2	1	2	2	2.2	3.9	283	2170	84.67	252.56	142.45	12.7	92.52	25.543	36.515	24.544	141	11.17	463	531	36	439	30	386	370	1.804	2.486	22.662	3.067	670	441	219.5	8.91	82.8	44.6	871	1274	232	19.81
33730	1	2	46	3		2	2	2	2		2	1	1	1	2.7	4.7	390	1989	45.72	330.88	209.06	4.5	34.69	15.751	10.975	5.808	69	2.28	131	146	0	167	0	7077	39	0.993	1.309	11.265	0.666	280	99	134.5	2.25	27.4	14.5	982	840	223	7.51
33731	2	1	26	2	1.16		2	2	2		2	2	2	2	3.5	4.4	306	2589	110.42	318.63	51.51	28.1	99.3	31.16	36.224	16.73	540	9.51	279	376	126	836	506	3361	1088	2.358	2.664	27.445	2.103	559	224	456.8	4.58	150.1	77.2	1207	1801	425	34.42
33734	1	1	25	1	0.95		1	2	2		2	1	2	1	1.5	2.2	175	1977	99.49	249.17	143.38	24.3	68.75	20.796	26.216	14.06	1031	4.94	337	371	1	401	26	5462	795	1.984	1.846	11.606	1.568	398	0	705.3	3.8	21.9	45.9	459	1686	266	15.4
33735	1	2	36	5	5	2	2	2	2		2	2	2	2	1	2.7	368	911	35.79	80.29	27.81	8.3	50.61	10.193	13.412	21.548	359	4.8	172	211	55	443	41	4302	640	0.51	1.014	10.979	0.813	163	9	245.1	2.19	7.8	49.5	390	495	167	5.74
33736	1	2	54	4	1.05	2	2	2	2					2	1.4	2.6	223	732	42.96	81.94	37.11	7.1	26.94	10.108	10.701	3.473	86	6.99	92	261	120	1925	20	6041	1914	0.952	1.546	15.819	1.419	281	144	139.3	5.19	67.7	117.2	886	775	148	11.98
33739	1	1	25	5	3.67		2	2	2		2	2	2	1	2.2	4.1	252	3782	120.97	382.03	127.96	21.8	153.36	61.018	58.603	21.992	279	10.31	313	389	16	893	6	30602	526	2.039	2.428	31.977	2.299	394	212	300.6	3.89	74.7	65.9	1774	2055	418	21.75
33740	2	2	29	2	0.98	1	1	2	2		2	1	1	1	2.6	7.4	340	1237	35.19	197.81	76.69	13.2	36.51	15.853	12.099	5.614	62	2.8	360	401	17	419	5	1	698	1.206	1.582	16.216	1.376	250	172	155.5	3.95	139.4	38	515	886	178	12.02
33743	1	1	26	3	1.24		2	2	2		2	2	2	2	2.3	2.4	232	3033	111.44	399.59	159.49	15.5	109.87	38.431	40.217	21.789	230	8.68	335	888	116	6564	25	19321	9896	2.341	2.482	30.18	1.321	557	314	234	3.01	98.5	613.8	1491	1461	252	21.26
33744	2	2	48	3	0.94	2	2	2	2		2	1	2	1	2.1	6.1	257	1712	71.23	250.22	174.56	10	50.25	17.406	17.733	11.763	165	1.39	101	135	14	406	0	1124	1251	0.799	1.457	27.263	1.438	293	53	227.8	1.13	20	35.7	344	766	236	6.79
33745	1	1	46	5	5		2	2	2		2	1	2	1	2.1	8.4	240	1906	98.12	162.56	34.76	12.3	93.92	34.11	37.368	13.978	240	7.9	156	166	3	118	7	835	149	6.545	3.356	46.002	3.272	609	466	290.3	9.06	65.1	39.6	1036	1706	368	19.26
33748	1	2	39	2	0.56	2	2	2	2		2	1	1	2	2.5	4.4	325	1917	49.25	323.54	200.92	5.7	48.16	16.32	20.868	7.013	96	2.7	200	240	6	485	0	0	749	0.865	0.937	12.066	0.521	232	155	140	1.49	6.6	31.4	468	759	154	10.29
33750	1	1	29	3	2.75		2	2	2		2	2	2	2	1.7	3.6	305	3212	86.17	335.53	134.84	9.7	106.74	31.224	41.244	26.036	558	10.76	400	446	20	543	13	9920	597	1.248	2.775	33.343	2.74	357	69	593.9	5.08	27.3	69	727	1606	322	12.3
33751	1	1	51	4	2.51		2	2	2					1	1.6	5	250	1827	47.31	142.82	72.85	6.5	78	24.594	28.542	19.459	198	6.23	267	312	3	539	6	0	784	1.139	0.643	9.735	1.149	125	39	229.7	5.12	28.4	42.6	335	770	151	5.34
33754	1	1	48	4	5		2	2	2		2	2	2	2	1.6	3.7	264	2566	80.37	326.17	211.25	15.3	111.44	27.699	52.464	21.033	209	5.84	734	1046	1533	2974	8	26140	392	0.967	1.544	17.657	1.576	179	58	329.4	5.82	41.3	67.9	375	1275	360	17.45
33755	1	2	23	2	4.05	3	2	2	2		2	1	2	1	2	4.5	260	1048	59.95	109.59	56.97	9.9	41.22	17.851	12.668	7.065	145	1.64	266	269	0	41	3	0	109	1.053	1.605	12.187	0.97	89	10	246.5	3.49	1.6	15.3	745	1062	184	6.24
33756	2	2	43	4	5	2	2	2	2		2	2	2	2	2.9	3	355	879	41.28	104.16	47.61	4.5	33.81	11.175	12.708	4.843	356	3.09	187	207	18	247	10	2574	398	0.432	0.929	8.583	0.66	159	38	231.8	2.02	24	20.3	369	650	141	5.18
33761	1	1	54	5	5		2	2	2					2	2.2	4.6	255	2154	89.67	264.14	101.51	10.3	83	35.256	30.498	11.699	370	3.87	1948	1979	2	409	8	5013	364	3.908	4.375	35.784	2.898	477	287	349.9	5.86	79.8	36.9	1661	1612	265	23.54
33762	1	1	44	5	5		1	2	2		2	1	1	2	2.4	4.7	274	2489	82.12	139.76	97.07	4.1	104.56	36.224	30.461	30.151	516	11.66	554	604	13	559	6	0	561	0.89	2.504	17.763	1.425	280	11	523	14.75	85.8	125.4	925	1351	344	7.77
33765	1	1	41	4	3.57		2	2	2		2	1	2	2	2.4	1.3	327	2606	90.93	288.57	122.88	12.4	123.28	36.796	49.439	27.51	607	7.65	566	575	13	95	81	3	793	1.815	2.056	29.474	2.691	292	143	496.2	6.54	29.6	40.2	582	1167	228	18.42
33767	2	2	47	5	4.92	2	1	2	2		2	1	2	2	2.1	5	294	2029	91.22	227.15	111.17	14.5	87.23	29.043	21.801	26.678	173	9.18	404	1240	1425	9080	518	13	12678	1.809	3.299	41.724	2.794	533	205	216.6	9.01	60.1	577.4	1242	1438	420	23.4
33768	1	2	65	3	3.99		2	2	2					1	2.1	3.7	300	2851	81.8	309.34	147.52	16	146.09	46.423	51.765	35.891	649	10.32	689	1034	1319	3502	20	0	1598	1.55	2.808	23.338	1.755	353	112	467.7	3.15	145.2	121.9	814	1248	273	12.05
33770	1	1	47	3	4.76		2	2	2		2	1	2	2	2.2	5.4	316	3182	125.29	458.68	166.67	21.4	86.9	26.028	33.106	13.272	248	12.92	540	616	82	692	2	12302	553	3.137	3.275	56.008	3.981	827	616	437.1	11.41	21.7	74	855	1679	431	35.56
33771	1	1	66	1	0.75		1	2	2					1	2.8	3.4	222	2367	108.99	271.22	71.7	21.5	60.32	20.679	27.646	5.695	214	2.97	366	426	98	514	341	2168	715	2.567	3.267	44.148	4.613	672	333	492.3	11.96	189.9	24.7	882	1517	389	28.89
33774	1	2	32	4	5	1	2	2	2		2	1	2	2	2.7	8.4	276	985	25.45	114.34	30.23	2.1	47.59	23.465	14.522	5.153	108	4.56	677	682	0	62	0	0	53	0.905	0.993	10.561	0.568	234	176	76.7	1.81	30	25.9	574	544	141	8.28
33775	2	1	50	5	5		2	2	2					2	1.5	4.5	314	2125	108.24	199.5	67.21	19.6	101.15	28.123	39.483	25.77	490	6.45	304	317	36	107	5	0	400	2.295	2.069	21.605	1.921	351	88	425.7	3.56	24.1	58.4	688	1590	301	12.94
33777	2	1	33	3	5		1	2	2		2	1	2	2	1.7	2.6	284	1064	25.18	177.97	108.1	21.8	35.09	5.774	12.293	14.532	81	8.32	31	2041	6415	20507	938	42715	3749	1.007	0.831	10.016	1.457	338	54	160	0.23	240.8	253	471	473	252	7.93
33778	1	1	40	2	1.91		2	2	2		2	2	2	2	3	5.6	380	3757	132.18	567.62	164.05	64.5	107.76	29.936	43.199	20.238	650	4.87	745	773	0	261	29	5	541	4.138	4.915	38.699	2.001	843	631	685	5.61	170.5	55.8	812	2292	414	36.23
33780	1	2	32	3	3	2	2	2	2		2	2	1	2	5.5	3.6	482	1072	29.09	206.24	152.99	7.2	16.86	7.803	6.095	1.145	59	1.9	134	161	39	294	24	6660	511	0.876	1.451	13.073	1.366	668	615	120.9	2.31	15.1	15.1	502	508	134	12.84
33784	1	2	54	5	5	2	2	2	2					2	1.5	5.8	286	2180	71.95	220.15	89.51	13.5	116.57	28.919	54.219	27.533	233	11.73	266	298	120	352	20	4502	586	1.481	1.874	17.203	0.874	323	168	272.6	4.29	11.5	68.3	996	1379	337	14.64
33789	1	2	25	4	2.05	1	2	2	2		2	1	1	2	2.1	5.4	351	1211	59.58	118.89	53.54	6.7	54.92	21.696	18.029	11.32	110	2.59	323	341	14	204	33	0	94	0.771	0.991	8.441	0.644	175	81	93.2	3.15	15.4	31.9	1145	995	157	4.69
33792	2	2	73	1	0.65		1	2	2					2	2.4	4.8	557	862	35.54	113.66	30.92	4.3	29.6	7.126	13.023	7.606	55	1.37	243	245	1	22	1	0	58	0.696	1.154	9.609	0.531	152	98	115.4	2.23	0.9	13.9	597	672	109	4.81
33793	1	1	76	5	2.5		1	2	2					1	1	4	319	4727	203.48	347.64	62.4	33.8	279.56	91.317	110.846	57.702	1032	15.83	1234	1584	1066	3656	12	2506	1482	5.214	5.493	43.589	3.663	539	167	898.1	8.16	77.3	219.7	1640	3219	561	25.07
33796	2	2	81	4	2.04		1	2	2					2	2.1	4.3	279	1051	37.89	117.39	69.75	9.6	49.63	14.811	14.186	17.008	142	3.45	299	325	18	296	37	324	498	0.526	1.329	4.009	0.93	104	9	208.9	2.82	45.7	50.8	953	819	207	3.84
33797	1	2	45	4	1.64	2	2	2	2	2	2	1	1	1	2.5	4.6	372	1455	52.07	192.87	64.95	17.2	55.3	20.241	19.76	9.811	103	5.28	18	607	2373	5625	73	620	1281	1.012	1.994	18.796	1.718	209	38	220	2.64	51.8	45.5	203	794	267	8.62
33798	1	1	50	4	0.41		2	2	2					1	1.8	3	285	6316	224.3	567.81	330.5	19.1	274.09	95.316	96.305	58.147	662	12.12	704	824	210	1130	406	5799	1439	3.552	4.42	59.774	4.539	560	221	694.5	10.09	185.4	127.4	2445	3153	525	23.37
33802	1	1	49	3	3.61		2	2	2		2	1	2	1	2.2	2.2	245	2348	87	259.32	38.51	18.4	103.02	21.245	41.271	26.357	341	13.64	257	345	71	1017	15	27932	467	2.259	1.955	25.922	2.137	299	134	454.7	2.51	28.7	87.1	666	1598	379	14.74
33803	1	2	38	3	2.07	2	2	2	2		2	1	2	1	2	2.8	363	1450	48.41	138.74	91.21	26.1	84.88	32.004	37.637	9.414	166	8.96	387	596	212	2384	62	3440	2747	0.782	1.349	15.351	1.83	456	0	206.9	1.43	181.5	202.6	656	709	262	7.34
33806	2	2	55	5	5	2	2	2	2					2	3.1	4.8	326	627	43.07	59.28	33.14	5	24.71	7.499	9.46	5.419	99	2.2	63	131	19	621	368	0	811	0.481	0.699	13.649	0.816	164	7	118	0.58	90.9	49.2	305	474	134	4.96
33808	1	1	74	1			1	2	2					1	4.2	3.4	201	1659	52.2	240.58	141.52	9.3	57.25	18.938	22.04	11.25	566	3.44	485	497	30	139	13	576	457	1.106	2.189	8.751	1.121	241	92	390.4	4.18	14.7	23.5	744	1051	161	8.57
33812	1	1	80	1	0.65									2	1.8	2.7	204	960	44.01	98.19	8.72	5	42.53	13.576	16.668	9.859	310	3.9	156	551	87	4677	22	0	7589	0.894	0.641	10.683	0.56	274	149	222.7	2.08	18.9	444.5	332	503	120	9.41
33814		1	22	1	0.65		1	2	2		2	1	2	2	2.5	4.4	264	2062	41.35	438.51	235.43	45.6	26.46	4.069	7.646	11.713	6	6.49	1	173	185	792	2340	56	2079	1.741	1.046	11.483	3.16	558	11	220.2	0.06	644.2	38.6	547	1278	524	13.16
33819	1	1	84	5	3.12		1	2	2					1	1.1	5.1	244	2733	122.39	270.24	123.51	19.2	120.22	46.061	44.545	14.62	735	8.73	777	1525	2801	7510	162	1	1168	1.959	3.928	34.055	3.018	393	92	711.3	14.85	53.6	98.6	1201	1965	320	17.26
33821	2	1	25	2	3.16		1	2	2		2	1	2	2	1.8	2.9	195	1522	60.87	227.93	51.78	18.7	43.05	9.812	14.936	13.795	444	5.38	204	377	583	1747	44	5764	1092	1.385	1.506	21.753	1.844	364	175	346.6	1.56	70	48.8	413	1030	244	12.21
33823		1	24	5	4.08		1	2	2		2	2	2	2	2.6	6	377	1987	110.24	284.77	162.75	7.6	44.48	15.495	15.653	7.537	232	5.31	124	326	174	878	2751	1042	2268	2.1	1.534	36.8	3.442	565	167	384.3	3.46	644.6	25.2	2689	1216	327	18.81
33825	1	2	61	1	0.55		1	2	2					2	2.8	3.2	354	1339	69.81	147.91	86.38	11.9	52.29	21.255	19.021	7.68	386	4.42	121	214	32	893	412	5442	390	1.667	0.994	12.324	1.366	147	0	305.2	2.11	91.3	22.6	575	1006	191	6.28
33827	1	2	43	3	4.39	2	2	2	2		2	1	2	1	3.4	5.4	319	2561	63.64	156.52	118.71	8.1	94.24	30.593	36.352	16.451	644	8.75	436	450	3	135	58	0	460	0.822	1.988	19.582	0.974	210	0	449.2	3.64	82.3	10.5	779	1251	359	9.03
33838	1	2	57	3	2.88	2	2	2	2					1	2	5.8	205	1026	54.25	141.13	48.4	13.3	28.45	9.279	11.268	6.4	140	3.26	404	554	653	1472	3	0	838	1.602	1.233	16.448	2.031	140	16	275.4	1.86	53.2	36.7	217	765	191	5.08
33840	1	2	35	5	3.13	2	1	2	2		2	2	2	2	1.7	2.8	289	1333	39.65	156.93	50.66	20.7	51.83	17.903	19.51	8.709	55	6.42	494	1262	2862	7605	360	6478	2189	1.151	1.752	15.731	1.574	390	107	169.4	1.13	115	114.1	1009	904	309	13.72
33841	2	2	21	2	1.5	2	2	2	2		2	2	2	2	3.1	5.8	500	1105	32.19	136.08	66.93	3.8	51.48	17.146	20.96	9.048	282	3.85	64	185	0	1299	323	18484	208	0.921	0.727	8.272	0.644	120	59	208.4	1.41	50.9	15.2	307	718	130	5.74
33845	1	1	31	3			1	2	2		2	1	2	2	2.3	3.8	336	1444	77.49	177.55	95.9	11.2	51.31	9.426	17.37	20.242	247	8.12	165	342	60	2001	198	383	3064	1.07	0.814	25.124	1.448	312	64	368.1	4.98	265.8	233.5	290	1019	182	9.37
33847	2	2	45	2	0.51	2	1	2	2		2	1	1	2	3.9	3.2	345	3005	152.92	276.94	127.77	23	153.36	35.109	52.9	56.988	463	5.79	204	389	63	2179	33	2354	1667	2	1.561	31.688	2.336	324	53	466.3	4.61	158.8	246.1	583	3079	1173	38.48
33852		1	23	4	4.22		2	2	2		2	2	2	2	1.6	2.4	194	1616	90.6	223.52	116.22	16.2	41.8	13.466	15.136	9.378	164	5.74	526	1095	2031	5376	853	1426	3121	1.927	2.061	27.684	2.758	682	424	291.5	5.27	337.4	109.2	898	1154	315	23.42
33853	1	1	69	5	5		1	2	2					1	1.2	1.6	192	2294	130.57	204.3	108.92	12.5	108.28	44.709	34.393	20.116	385	6.03	531	968	1104	4692	0	7822	2503	0.882	1.862	27.797	1.766	279	83	270.9	2.98	31	171.1	1568	1608	325	11.61
33854		2	63	2	0.9		1	2	2					1	3.1	5.1	321	1494	77.53	162.77	60.28	9.4	59.12	21.201	18.387	14.172	463	6.28	384	452	64	537	473	7514	785	1.106	1.679	10.551	1.441	357	124	341.5	4.17	166.8	33.8	973	1039	164	9.93
33856		2	21	4	0.63	2	2	2	2		2	2	2	2	2.1	3	247	332	2.82	59.46	44.82	1.5	10.28	2.985	2.629	3.327	0	1.81	0	0	0	9	0	0	89	0.096	0.155	1.741	0.356	25	0	11.9	0	6.6	6.6	41	72	43	1.51
33860	2	2	42	5	5	2	2	2	2		2	1	2	2	2.5	5.9	284	2800	154.63	216.97	92.49	19.7	148.89	35.568	48.497	54.816	719	29.38	670	966	1017	3054	12	700	871	1.745	3.278	43.13	2.966	437	137	667	6.87	36	124.4	1367	2529	362	17.5
33861	2	1	81	3	2.03		1	2	2					1	1.7	4.9	204	2200	69.89	264.54	140.89	11	97.21	33.952	41.649	15.052	397	7.24	621	1401	1268	8633	241	0	570	1.964	3.038	18.028	1.107	458	217	384	3.46	158	55.4	1046	1637	231	11.87
33864	1	2	61	5	5		1	2	2					1	1.9	4.5	306	975	58.09	52.16	20.55	4.8	46.35	17.587	17.964	6.604	503	5.97	397	906	3	6113	10	10989	10609	0.557	1.58	9.429	1.293	257	28	373.3	4.03	41.4	467.8	836	976	212	9.58
33866	1	2	46	5	5	2	2	2	2		2	1	2	2	2.6	3.1	650	2770	107.99	260.85	115.67	10.2	92.89	24.475	35.382	22.829	587	7.34	207	281	139	761	134	3008	576	1.669	1.942	21.401	1.422	331	191	534.9	8.06	23	72.7	706	1745	255	14.64
33871	1	2	62	2			1	2	2					2	1.8	3.3	266	1205	39.3	154.31	96.03	3.1	48.72	9.934	16.21	19.148	149	4.97	84	137	27	168	806	0	1046	0.617	0.601	13.811	0.89	171	20	104.2	0.53	187.4	37.8	120	429	105	6.96
33876	1	1	49	3	5		2	2	2		2	1	2	1	1.8	4.7	239	2621	91.29	283.14	133.26	5.4	76.2	30.276	24.414	12.248	269	2.94	248	285	18	383	87	2408	214	1.339	2.744	38.533	1.979	491	153	477	7.42	22.2	30.9	1056	1555	320	11.24
33877	1	2	30	4	4.39	1	2	2	2		2	2	1	1	3.2	8.1	430	3026	117.03	348.35	199.38	13.1	133.94	64.794	41.734	15.357	1160	7.21	1122	1161	9	408	39	423	786	1.908	3.484	19.777	1.127	577	326	713	7.74	164	38.5	1731	2117	356	18.28
33879	1	2	29	3	0.75	2	2	2	2		2	1	2	1	3.1	5.3	333	2253	82.66	290.19	213.12	18.9	88.24	44.969	29.005	5.452	330	3.78	599	973	1573	3711	46	2890	1477	1.09	3.013	10.341	1.223	217	47	346.9	7.46	19.4	52.2	1740	2087	257	9.92
33880	1	2	29	4	1.3	2	2	2	2		2	2	2	1	2	3.1	196	2065	68.61	222.19	172.74	4.1	102.84	41.81	36.238	15.363	207	3.17	281	296	11	163	19	99	174	0.468	1.074	12.319	0.864	120	52	169.5	6.17	15.6	41.8	998	923	112	8.45
33885	1	2	40	5	5	2	2	2	2		2	2	1	2	2.2	3.3	334	1801	80.3	202.33	72.39	13.7	59	12.726	22.439	17.422	149	14.94	788	814	35	260	76	8	235	2.03	3.172	33.571	2.732	647	529	250.7	8.52	22.3	66.3	867	1328	310	27.65
33892	1	2	70	3	5		2	2	2					1	2.5	2.8	315	2955	67.73	323	147.71	17.4	133.38	66.477	42.814	14.026	397	9.15	1683	1818	8	1469	334	6028	1103	2.069	2.438	20.333	1.903	571	330	250.4	5.52	125.1	150.8	1243	1255	325	20.2
33894	1	2	63	4	1.46		2	2	2					1	1.9	2.3	278	1676	67.69	152.72	54.52	16.5	92.45	24.627	29.349	28.937	160	8.46	261	344	163	898	21	2549	583	0.898	1.326	17.857	1.929	246	56	214.9	3.42	59.5	99.4	733	871	305	9.71
33895	2	2	64	4	3.9		1	2	2					2	2.3	7.1	263	3681	157.08	450.07	207.45	15.1	140.22	50.512	52.123	25.312	608	13.56	770	863	10	961	305	34364	456	4.2	3.471	30.074	3.208	407	181	587.6	4.99	88.4	73.4	1337	2187	389	16.06
33899	1	2	30	4	0.64	2	2	2	2		2	1	1	2	2.7	5.8	492	1540	40.3	276.47	88.24	14.8	34.06	9.844	9.988	9.637	236	3.08	475	476	0	23	1	0	332	2.558	2.3	22.977	1.547	673	604	211.8	4.67	0.8	16.1	495	871	261	18.74
33904	2	2	57	1	1.66	2	2	2	2					2	2.3	4.2	232	464	15.26	63.76	33.18	4.4	17.5	4.678	6.644	4.645	188	1.82	73	93	10	132	220	0	362	0.595	0.959	4.217	0.392	146	32	162.7	0.64	104.8	126.9	280	457	77	3.44
33907	2	2	26	4	0.9	2	1	2	2		2	1	2	2	1.8	5.9	244	1007	54.41	115.49	39.32	10.6	37.44	19.357	11.126	4.456	105	2.58	297	352	16	474	368	2411	643	0.743	1.075	8.785	1.186	184	63	107.5	4.08	125.3	31.3	1482	1206	200	8.07
33908	1	1	21	1	2.07		1	2	2		2	1	2	1	1.7	7.2	315	2378	58.39	197.52	17.83	14.8	23.55	6.864	8.872	5.667	97	1.92	15	204	604	1922	61	17924	458	0.931	1.506	38.232	2.991	439	39	591.8	1.37	37	16.1	436	1463	471	8.4
33910	2	1	42	5	2.17		1	2	2	2	2	1	2	2	2.5	4	160	1727	63.36	250.1	128.88	32.5	66.8	9.629	35.387	17.276	55	31.87	55	1949	1296	22102	1	1163	37062	1.048	2.228	16.753	2.366	744	11	271.9	1.23	189.2	1628.3	1169	1136	769	21.61
33913	2	2	54	2	4.8	2	1	2	2					1	2.6	3.8	252	2860	99.51	198.19	48.38	18.4	195.17	43.872	85.907	51.6	253	7.86	165	1687	36	18213	65	0	38986	1.052	1.179	22.122	1.585	301	83	252.5	0.68	87.1	1803.4	578	1496	654	21.1
33915	1	1	85	4	3.79		2	2	2					1	1.6	4.1	207	1029	76.03	74.89	35.99	1.4	40.46	14.161	14.51	7.322	227	0.94	378	384	7	75	18	0	125	1.179	2.556	29.969	2.346	220	164	217.8	5.45	8.3	7.3	452	783	125	14.1
33916	1	2	69	3	1.89		1	2	2					2	1.8	6	351	1914	77.85	237.8	134.55	20.9	74.25	27.575	25.138	16.914	293	16.62	544	750	917	2019	58	1	1013	1.779	2.704	9.549	1.387	260	19	346.4	4.76	86.9	87.7	1545	1977	461	10.43
33917	1	1	51	2	4.1		2	2	2					2	1.6	2.9	279	3379	123.11	422.51	193.68	28.5	140.97	45.254	56.708	30.093	316	12.66	865	996	96	1237	110	14445	1405	2.977	3.825	54.324	4.565	652	385	322.2	9.5	121.5	77.6	1438	2232	474	33.53
33918	1	2	31	4	1.33	2	2	2	2		2	1	2	2	1.7	4	303	1123	48.91	178.72	93.78	26.8	27.12	9.362	10.676	4.774	79	3.07	54	156	88	575	1244	0	1245	1.355	0.845	10.456	1.134	424	72	155.4	0.9	467.2	12.4	730	653	204	7.9
33921	1	2	83	2	3.56		1	2	2					2	2.1	3.3	270	1979	92.58	267.68	135.65	13.2	64.24	27.335	20.999	10.626	222	3.3	1163	1245	148	859	58	3165	543	2.095	3.993	27.767	3.054	410	222	330.7	10.12	49.3	39.9	1934	1907	415	19.44
33922	2	2	83	3	2.39		1	2	2					1	1.3	6.1	376	1055	38.57	124.07	24.34	6.9	48.13	9.763	17.601	16.483	75	4.11	183	217	79	332	62	2542	2604	0.564	0.671	16.776	0.741	232	65	125.5	2.67	13.9	46.9	199	468	119	7
33924	2	2	24	2	0.75	2	1	2	2		2	1	2	2	2.3	5.3	291	1600	83.7	179	50.57	17	63.43	21.349	25.324	8.916	1035	4.69	577	647	153	748	34	0	798	1.228	2.072	12.986	1.664	349	91	663.8	5.03	26.2	11.8	675	1227	251	15.53
33925	2	2	71	5	3.57		2	2	2					2	3.4	5.6	430	2983	51.58	463.64	305.12	12.5	114.01	35.104	44.128	27.65	190	5.15	304	351	28	542	7	2873	406	1.221	1.604	11.608	0.532	329	197	153.9	2.42	25.5	97.1	832	1122	223	16.59
33928	1	1	67	3	3.01		1	2	2					2	1.4	3.1	198	2189	64.7	276.72	136.94	13.6	92.73	22.736	39.313	22.305	559	7.67	144	171	47	324	15	5680	597	1.664	1.579	17.188	1.55	276	129	406.8	2.41	151.4	55.1	491	874	242	14.87
33929	1	1	54	4	5		2	2	2					1	2	3.9	226	2548	91.9	292.27	149.56	13.8	114.6	46.601	42.895	18.547	220	3.82	430	477	50	555	14	9238	313	1.756	3.019	18.896	1.357	362	155	306.9	8.02	45.1	74.5	1545	1708	266	16.63
33930	1	1	74	3	1.89		2	2	2					1	2	4.3	263	2028	118.24	169.24	80.16	18.9	93.75	27.689	35.063	24.47	350	9.76	855	905	237	415	173	0	913	2.059	3.398	30.756	3.04	626	356	440.4	11.35	91.6	90.6	1636	2022	462	15.74
33931	2	2	35	5	1.24	2	2	2	2		2	2	2	2	1.3	3.7	193	2034	63.54	255.54	103.99	23	87.95	34.287	36.426	12.367	219	5.6	216	322	66	1219	3	7378	966	1.835	1.715	20.296	1.654	334	166	261	4.78	32.8	108.5	586	917	274	19.21
33932	1	1	28	4	4.39		2	2	2		2	2	2	1	1.6	7.6	271	3420	140.03	420.72	188.65	32.3	136.97	29.893	49.552	46.18	413	14.81	235	414	60	1544	1159	0	3251	1.746	3.002	29.532	2.856	551	41	521.9	22.18	363.5	124.4	1788	2285	581	17.87
33934	1	1	57	4	4.68		2	2	2					2	2.1	5	230	1884	116.77	220.48	56.39	26.6	62.31	22.104	20.361	13.448	275	5.79	532	574	50	501	0	0	1892	2.001	2.873	49.167	3.724	574	338	382.7	4.43	44.8	51.3	742	1506	445	23.72
33935	2	1	25	4	1.99		2	2	2		2	2	2	2	2.8	4.7	322	1978	92.1	260.03	45.95	20.9	64.8	30.812	19.661	8.749	171	3.57	329	1548	5028	12108	17	656	539	2.565	2.241	22.363	1.156	462	278	190.8	2.26	32.1	47.7	1354	1717	286	14.98
33938	2	2	67	5	1.56		2	2	2					2	2.4	3.4	238	1544	50.12	228.84	138.86	16.3	54.71	12.189	23.613	15.113	62	7.56	446	487	48	304	315	0	841	1.378	1.318	20.151	2.018	450	159	182.6	2.3	185.8	72.6	491	872	292	13.28
33941	1	2	81	3	1.56		1	2	2					1	1.8	5.6	352	1598	42.22	177.5	76.07	18.2	64.68	22.316	21.228	15.453	85	5.98	518	705	206	2116	20	7693	1614	1.312	1.885	13.026	1.28	524	316	143.9	3.23	50.1	77.6	920	1123	220	17.3
33945	1	1	65	2	5		2	2	2					1	1.4	3.7	375	2780	126.52	413.31	221.87	35.2	76.21	22.285	28.626	17.516	222	11.22	1065	1130	95	624	233	3475	592	4.194	5.598	65.528	5.703	1074	773	409.8	13.79	198.9	50.3	1017	1945	514	48.03
33947	1	1	64	5	4.35		2	2	2					1	2.4	5.8	508	2611	90.51	416.38	233.29	15.2	70.58	22.769	27.853	10.935	131	5.65	429	505	104	846	82	9601	545	2.301	2.629	34.889	3.624	494	373	317.1	8.57	89	45.8	795	1343	236	28.85
33949	2	1	54	4	5		2	2	2					2	2.2	4.7	283	5460	174.94	749.04	500.07	36.1	206.28	78.717	68.58	41.101	989	21.02	1329	1435	44	983	652	0	2553	3.956	5.671	39.388	4.753	966	283	869.6	13.48	495.2	85.9	2650	3690	816	47.38
33952	1	1	21	1	1.68		1	2	2		2	1	1	2	2.5	5.1	443	2099	56.45	305.52	110.48	26.2	79.41	24.798	30.956	19.358	200	7.35	633	935	990	3093	77	4426	1329	0.962	1.596	14.712	1.543	217	50	204.8	0.81	35.7	119.6	658	1475	360	12.34
33954	1	2	30	5	4.05	1	2	2	2		2	2	2	2	1.3	8.2	231	3089	152.1	390.94	157.84	22.9	102.05	32.193	34.697	22.715	541	9.41	798	933	74	1405	352	10568	1249	2.879	3.996	30.502	1.911	707	409	521.4	7.17	136.7	138.5	2288	2316	420	20.58
33959	2	2	81	2	0.99		1	2	2					2	1.3	6.3	373	1282	59.61	120.42	60.9	10.7	65.34	37.31	19.076	4.221	180	2.31	487	538	26	500	199	0	677	0.786	1.232	7.227	1.072	210	12	111.8	1.69	121.1	34	1399	1133	174	5.84
33960	2	2	59	2	3.85	2	2	2	2					2	3.6	2.2	353	2346	81.64	180.58	98.35	16.8	152.4	44.986	68.202	30.307	134	10.94	178	188	13	114	33	0	75	0.766	1.243	28.648	0.903	327	100	163.7	2.51	2.3	24	690	1234	330	9.37
33963	1	2	21	4	3.2	2	1	2	2		2	2	2	2	3.2	5.4	262	1737	58.28	202.18	72.69	17.5	79.85	30.16	23.299	22.031	167	9.37	309	829	187	6100	66	16923	10784	1.136	1.408	10.753	1.001	429	144	138.9	0.93	104.9	494.8	982	908	253	11.91
33965	1	1	50	4	1.99		2	2	2	2				1	2.6	3.8	384	3354	150.26	411.6	182.99	35.3	126.28	32.584	41.187	43.265	681	16.89	571	1219	2779	6366	16	2066	1336	2.026	1.939	27.186	2.679	766	170	639.9	12.23	48.7	126.8	1052	1985	451	21.41
33966	2	2	20	4	4	1	2	2	2		2	1	2	2	1.1	5.8	220	1399	41.93	180.16	102.07	13.4	60.61	20.352	24.743	9.758	384	2.84	648	668	35	196	61	2506	642	1.197	1.63	13.728	1.568	308	152	274.9	2.47	90.1	19.8	501	857	186	15.7
33967	1	1	24	5	5		2	2	2		2	1	2	2	1.7	2.3	209	2896	154.64	278.81	187.93	5.7	129.68	56.003	46.784	12.072	440	5.74	537	548	0	143	7	0	35	0.878	2.422	28.75	1.847	189	78	373.2	10.13	33.5	27.6	2153	2216	330	12.93
33971	1	2	64	3	0.23		2	2	2					1	1.5	3.1	221	1393	58.07	187.78	64.7	15.9	48.26	14.6	15.702	13.433	217	3.49	103	469	1480	3612	60	0	627	0.891	1.006	15.978	2.233	177	15	307.5	3.19	148.2	127	446	704	229	8.51
33972	1	1	65	4	3.9		2	2	2					1	3	6.9	248	3432	100.16	411.29	170.12	17.6	156.77	52.711	60.404	33.017	283	11.14	990	1578	2278	5930	2	1	2084	1.956	2.566	39.616	2.964	415	220	256.2	6.17	32.2	91.4	900	1659	280	24.66
33974	1	2	25	4	4.52	1	2	2	2		2	1	2	1	1.3	6.2	178	1654	64.63	250.88	123.94	21.8	46.86	15.971	16.85	9.837	144	27.76	551	1706	4815	11257	357	10229	1584	3.351	4.378	47.457	4.468	864	674	239.5	12.12	189.9	111	2640	1255	285	36.56
33978	1	2	48	4	4.56	2	2	2	2		2	1	2	2	2	7	315	2701	54.31	394.18	299.26	17.2	59.53	20.549	22.059	13.245	212	5.05	224	363	330	1415	227	6379	825	1.031	1.962	9.944	0.853	249	67	219.8	2.8	127.5	51.3	1220	1481	240	8.94
33981	2	2	20	4	0.1	2	2	2	2		2	1	1	2	1.7	3.9	482	2523	131.21	281.3	169.76	11.9	97.69	26.533	33.368	29.181	521	6.1	796	954	577	1562	69	2507	894	3.129	2.965	40.377	3.669	650	466	485.7	12.13	105.9	140.4	777	1694	313	29.18
33982	1	2	85	3	2.24		1	2	2					2	2.7	2.7	305	802	26.96	88.64	38.27	6.3	38.12	14.921	11.281	10.12	38	3.61	221	380	298	1753	23	257	1275	0.448	0.848	8.694	0.426	183	51	99.5	1.75	7	137.5	446	522	115	4.34
33983	1	2	30	5	5	1	2	2	2		2	2	2	1	1.5	5.8	226	1807	62.84	220.83	60.61	37	79.45	29.687	34.861	9.112	323	4.25	238	273	39	363	20	1608	1622	1.112	1.457	17.017	1.403	410	69	323.5	3.14	47.3	75.2	976	1217	291	15.57
33984	1	2	63	4			1	2	2					1	2.1	3.1	294	1930	60.83	255.66	103.99	20.6	79.34	21.454	29.448	19.258	615	8.85	487	528	71	453	12	1029	854	1.195	1.987	13.49	1.554	227	21	444.8	3.12	22.9	57.7	743	1209	350	13.7
33988	2	2	23	2	2.45	1	1	2	2		2	1	2	2	2.1	5.5	167	2233	62.79	402.35	123.07	14.6	42.84	15.645	14.466	9.091	131	3.14	302	326	36	241	30	1671	239	2.228	1.773	28.929	3.171	629	521	194.3	5.51	35.5	21.9	427	915	213	21.65
33990	1	1	82	4	2.13		2	2	2					1	1.9	3.8	241	1424	53.38	170.53	62.54	7.9	59.77	16.446	23.701	15.454	320	4.39	156	214	68	551	193	1312	787	1.475	1.904	17.413	1.075	483	318	264.6	5.49	59.4	51.1	660	953	202	17.89
33992	1	1	20	4	4.75		2	2	2		2	2	2	1	3.3	6.1	270	1372	56.18	170.81	93.67	7.5	53.3	19.582	23.445	6.056	158	15.26	764	768	5	54	0	836	215	1.873	2.124	29.238	2.507	720	653	206.1	10.48	119.4	7.7	809	853	172	26.35
33998	2	2	46	4	0.81	2	2	2	2		2	2	2	2	0.7	9.2	440	1617	80.52	166.4	54.58	10.1	71.77	31.317	22.92	11.938	189	2.62	384	411	44	305	7	772	319	2.061	2.984	27.726	2.529	892	805	204.7	5.61	16.4	39.5	1634	1569	230	32.28
34000	1	2	23	2	0.62	2	1	2	2		2	1	2	2	2.3	5.7	252	1818	119.98	237.9	158.81	13.7	44.34	13.033	16.712	9.832	368	2.3	68	104	1	336	123	4	157	0.737	1.228	24.939	1.242	85	30	328.1	2.14	120.1	24	315	1083	211	10.5
34002	1	1	21	3	1.89		2	2	2		2	2	2	2	1.6	2.7	305	4691	251.79	335.54	124.89	10.7	256.66	98.047	93.473	45.655	731	10.14	817	870	0	590	46	13195	334	2.377	3.436	39.854	2.176	379	225	417.4	7.99	25	86.1	3678	3412	308	21.35
34004	1	1	46	3	2.05		2	2	2		2	2	2	2	2	4.9	242	2801	135.58	276.22	123.7	12.6	98.7	36.959	33.897	16.645	326	9.05	244	350	305	1124	8	1557	353	1.276	2.588	44.979	3.567	404	106	654.3	6.66	30.9	107.8	488	1545	391	19.35
34006	1	1	81	5	2.65		1	2	2					1	2.6	4.4	381	2661	87.02	302.57	152.07	17.7	126.78	57.169	43.466	16.87	404	6.99	802	841	27	435	36	9818	505	1.954	4.114	25.362	2.105	616	398	366.9	6.51	47.6	41.9	1222	1688	328	18.75
34012	2	2	82	1	1.27		1	2	2					2	1.6	1.8	260	1057	38.91	142.51	74.39	4.9	37.89	10.893	13.119	11.312	80	2.8	308	320	16	142	9	383	139	0.673	1.254	11.941	0.63	136	61	128.5	2.03	6.8	21.5	621	664	119	4.39
34015	1	2	76	3	2.34		1	2	2					1	1.5	4.9	207	1620	64.44	276.15	157.88	17.9	34.3	15.151	7.866	8.323	107	3.99	599	633	63	395	9	1544	428	1.192	2.635	20.8	2.453	321	0	292.6	3.92	46.4	50.1	969	1464	418	12.1
34016	2	2	85	1	3.82		1	2	2					2	3	6.8	180	1296	54.84	155.27	63.27	9.8	51.51	16.028	18.054	12.48	227	3.68	222	231	0	87	15	0	127	0.798	0.825	15.99	1.269	143	70	143.9	1.11	19.5	34.3	177	537	117	6.69
34017	1	2	30	5	5	3	2	2	2		2	1	2	2	2	2.8	247	1665	77.89	191.31	72.37	15.4	66.92	20.085	23.529	16.247	152	6.24	69	161	64	952	246	294	1480	1.409	1.474	16.936	1.145	402	183	252.6	4.08	150.3	147.5	737	915	206	11.91
34020	1	1	25	2	1.33		1	2	2		2	1	2	1	1.7	2.8	262	3698	142.14	460.84	288.31	9.4	145.14	38.527	57.928	36.237	553	10.17	207	247	6	469	22	7519	487	1.306	1.985	42.394	2.534	294	145	399.3	4.87	32.6	71.5	549	1585	248	18.26
34021	1	2	23	3	2.56	1	2	2	2		2	2	2	2	2.6	7.3	4	3599	80.75	532	288.58	19	132.78	33.695	58.234	33.784	268	6.55	606	648	96	434	17	3529	511	2.989	2.575	30.551	2.295	506	289	280.2	6.7	28.9	106.2	773	1425	210	23.91
34023	1	1	24	3	1.68		1	2	2		2	1	2	1	2.6	4.9	262	2063	76.51	287.31	143.07	16.6	68.84	25.139	26.823	11.575	272	4.24	322	359	50	424	4	719	710	1.761	1.988	16.054	1.119	355	166	308	3.42	34	46.1	778	1316	205	14.33
34029	2	2	50	1	1.07	2	1	2	2					2	2.3	5.2	281	1657	40.93	264.18	139.91	15.1	50.97	14.929	19.912	12.202	99	4.1	98	146	20	555	28	4309	633	1.002	0.973	10.858	0.997	282	114	128.3	1.8	137.1	43.3	656	755	235	10.18
34037	2	1	20	4	1.95		2	2	2		2	2	2	2	2	2.8	242	3455	142.82	394.97	159.15	14.1	144.85	51.479	53.989	25.888	463	10.01	291	338	1	571	3	33560	215	2.52	2.759	38.664	1.375	488	317	336.2	7.61	35	68.1	1409	1833	279	24.7
34040	2	2	84	4	2.2		2	2	2					2	1.8	2.1	218	923	34.32	88.19	27.45	8	48.67	15.887	17.846	11.294	52	9.59	618	624	0	75	12	0	254	0.836	1.1	13.04	2.303	491	394	76.3	7.96	22.6	34.5	432	568	130	11.98
34041	2	2	22	3	0.77	2	2	2	2		2	1	2	2	1.9	4.7	349	2555	90.08	307.14	177.19	14.1	112.34	37.587	36.468	28.719	630	6.21	462	507	65	480	20	7060	1155	0.844	1.388	17.045	1.371	196	71	378.6	3.27	19	37.3	885	1441	211	12.58
34043	1	2	20	4	0.76	2	1	2	2		2	1	2	2	2.6	6.5	374	1410	44.6	214.86	103.51	16.6	45.65	16.569	13.653	10.564	160	5.04	528	638	388	1069	144	6386	555	1.658	1.936	17.19	1.879	631	443	182.6	4.54	167.1	61.6	888	945	210	19.89
34046	1	1	48	3	2		2	2	2		2	2	2	1	1.1	6.4	241	2049	37.25	284.76	172.73	9.7	91.89	30.683	37.116	16.589	108	6.41	346	368	5	246	14	3341	80	0.871	1.413	9.124	1.278	173	66	152	2.34	14.9	62	765	981	333	9.87
34047		1	57	5	5		2	2	2					1	1.6	4.5	297	3242	115.85	312.21	144.82	23.3	146.48	38.058	51.614	46.028	419	9.46	297	629	1107	3365	17	7232	1534	2.296	3.358	32.591	2.179	479	173	574.4	21.09	85.2	224.3	1379	1887	385	18.75
34050	1	2	74	1	1.01		1	2	2					2	1.3	4.9	235	1873	66.87	252.61	70.93	18.2	68.09	16.741	25.051	18.617	122	7.78	1147	1416	1206	2633	28	0	1181	2.104	2.58	29.522	1.585	488	320	220.6	2.27	10.3	61.4	1188	1265	297	24.54
34051	1	1	36	4	1.39		2	2	2		2	1	2	2	2	3.8	318	3337	152.11	285.29	132.86	18.3	178.71	61.684	53.168	45.693	425	10.98	716	723	36	146	4	0	245	1.667	3.962	36.563	3.8	319	27	515.2	11.49	85.1	76.9	2550	2619	501	15.14
34052	1	1	22	3	2.94		2	2	2		2	2	2	1	3.2	5.3	408	5445	262.1	456.41	237.79	15.9	265.84	72.952	114.652	58.95	851	17.27	665	682	1	178	3	945	187	2.785	3.295	69.227	4.887	408	162	986	15.63	80.8	95.1	1127	3274	523	22.52
34058	1	1	71	3	1.51		1	2	2					1	1.7	4.1	260	1281	42.77	176.52	101.99	10.7	48.19	12.176	17.616	14.703	84	4.33	114	1065	211	11284	48	0	18081	0.619	1.153	9.96	0.883	322	66	187.3	1.35	43.1	1054.1	711	600	156	9.67
34060	1	2	70	4	0.79		1	2	2					1	0.8	2.9	110	2334	55.85	334.94	235.09	11.2	74.23	21.733	27.321	19.762	135	4.74	78	90	18	132	24	1704	212	0.779	0.943	21.316	1.313	198	44	204.2	0.9	264	30.4	594	707	251	8.52
34062	2	2	67	5	3.9		2	2	2					2	1.4	2.5	253	1039	52.97	111.12	29.23	8.7	42.81	16.29	15.545	6.215	144	1.91	124	142	27	209	15	1768	163	0.71	1.05	14.141	0.911	136	47	162.8	3.77	7.9	21.8	445	794	168	8.87
34064	1	2	81	5			2	2	2					1	1.1	3.5	364	2173	118.34	249.26	97.38	25.8	64.75	20.149	20.891	17.94	334	9.12	599	829	166	2523	334	5827	4251	1.448	2.035	36.488	2.374	372	37	503.4	25.72	171.4	144.8	1421	1941	477	17.75
34068	1	1	20	3	1.53		2	2	2		2	2	1	1	1.9	3.4	264	4549	154.96	491.18	208.82	25.2	222.69	77.634	76.37	48.094	400	12.4	482	543	51	681	25	19610	901	2.686	2.852	35.717	1.83	514	274	375.7	6.74	18.3	90.7	1581	2346	391	25.74
34069	1	2	62	5	5		2	2	2					1	2.3	5	248	1502	70.71	157.33	79.83	13.5	70.98	22.631	25.643	17.691	132	7.77	523	560	14	435	5	0	549	0.89	1.587	23.766	1.728	219	38	258.4	3.45	17.4	36.6	840	1187	299	7.62
34070	1	1	35	3	2.69		2	2	2		2	2	2	1	2	4.5	262	3113	68.62	425.47	231.34	15.1	130.99	47.072	48.376	25.645	180	7.31	318	330	2	138	6	0	167	1.756	1.372	23.223	1.995	288	137	211.5	2.97	14.9	50.9	774	1254	242	13.59
34073	1	2	39	5	5	2	2	2	2		2	2	2	2	2.6	3.7	340	3971	229.81	521.23	343.57	29.3	117.64	43.105	40.815	21.989	1126	12.68	1257	1332	88	845	100	1739	620	3.755	5.712	42.062	4.127	717	469	906.8	28.79	201.7	58	2027	3885	916	53.64
34074	1	1	41	4	2.21		1	2	2		2	1	2	2	2.3	5.8	287	3759	184.25	483.02	232.4	25.1	121	48.335	40.483	20.214	514	7.61	311	508	610	2056	6	2411	620	1.844	2.345	51.949	3.544	436	204	622.2	6.79	54.3	115.9	1048	2640	455	24.58
34078	1	1	37	4	0.94		2	2	2		2	2	2	1	4	5.5	276	3773	156.31	388	261.58	6.6	177.8	65.012	62.683	30.986	879	6.21	678	698	35	267	27	1668	469	1.683	3.567	40.311	2.074	370	170	649.6	7.86	6.3	39.1	1582	2312	325	15.74
34079	1	1	70	1	5		1	2	2					2	1.6	3	193	2001	81.3	277.06	69.5	25.8	61.86	17.781	29.031	9.27	136	4.08	216	231	0	189	4	13059	63	2.136	1.634	23.242	2.287	717	401	255	5.71	32.1	23.5	716	1256	293	21.71
34080	2	1	44	5	1.07		2	2	2		2	1	2	2	1.7	4	225	1697	64.63	203.32	124.23	5.8	71.31	25.177	31.629	10.18	375	3.24	77	128	26	266	577	146	973	1.879	1.965	16.904	0.838	470	144	341.7	5.27	245.9	29.3	410	1053	178	14.35
34083	1	2	54	2	2.17	2	1	2	2					2	1.3	3.3	321	2576	85.44	309.75	84.82	14.8	111.28	41.473	41.722	19.532	582	5.86	619	634	1	201	10	0	536	2.261	2.977	17.297	0.718	434	265	438.8	3.64	1.8	39.4	1173	1520	252	17.48
34084	1	1	65	3	4.18		1	2	2					2	2.8	2.9	169	3297	162.65	214.18	113.6	8.7	145.68	48.181	48.428	36.322	573	9.76	613	1077	1758	4471	510	915	1053	1.433	3.161	37.99	2.809	280	56	574.2	5.53	119.7	52.9	1300	1880	331	17.05
34086	1	1	64	1	3.18		2	2	2					1	1.8	5.3	162	3551	151.65	469.12	153.27	36.3	125.25	30.276	40.631	44.878	488	18.48	425	451	60	267	60	0	521	13.083	6.051	98.793	7.095	1347	1077	529.8	14.07	183.2	77.2	1638	2972	802	58.72
34087	1	1	81	3	1.37		1	2	2					1	1.5	6.3	259	3168	112.12	399.68	253.87	15.8	131.68	49.237	43.015	29.464	414	6.86	634	919	221	3264	83	0	472	1.57	2.088	31.366	1.756	344	149	454.8	7.04	150.9	85.1	1256	1616	348	17.79
34088	1	2	36	4	2.43	2	1	2	2		2	1	2	1	3.3	7	352	3140	107.32	442.97	106.25	22.5	91.52	34.119	30.315	20.918	153	8.4	246	342	14	1120	28	27080	871	3.478	2.708	30.338	1.524	658	393	222.7	2.56	114.3	86.9	1478	1850	296	23.75
34090	1	1	65	2	1.88		2	2	2					1	2.4	2.4	246	2099	80.06	125.65	46.93	4.6	99.53	38.795	39.221	12.488	649	3.87	401	420	3	209	10	2436	384	1.234	2.684	24.131	1.529	271	64	575.5	5.36	3.7	23.2	749	1357	244	10.65
34091	1	1	69	5	5		1	2	2					1	2.3	2.8	273	1745	63.02	194.41	87.99	18.7	66.57	14.921	28.849	17.782	131	15.42	250	363	245	1021	409	9372	592	1.101	1.518	19.262	1.538	304	113	197.1	1.7	140.1	40.3	609	967	318	10.93
34092	1	1	55	4	2.27		2	2	2					1	1.7	6	272	3814	147.1	332.63	161.3	8.9	169.7	74.247	62.949	18.247	1076	8.08	1357	1418	14	500	442	844	1151	2.005	4.393	27.651	2.162	652	150	828.4	8.76	257.5	39.4	2240	2760	382	15.63
34093	2	2	22	1	0.93	2	2	2	2		2	1	1	1	2.4	3.5	237	2152	61.51	320.8	208.64	6.9	70.92	24.147	33.412	7.733	154	2.16	100	128	47	310	0	3068	142	0.908	1.045	16.197	0.992	184	120	167	4.48	8.5	29.1	503	833	117	12.3
34096	2	1	82	1	5		1	2	2					1	3.9	4.1	210	3669	88.11	467.37	292.09	27.1	170.29	44.908	61.588	53.412	435	14.87	826	1283	57	5380	246	488	2425	1.984	3.386	17.793	2.405	460	143	465.3	5.63	141.1	185.3	1654	1754	373	14.94
34101	1	2	26	4	3.73	1	1	2	2		2	1	2	2	2	16.3	346	2418	95.49	310.39	139.78	20.3	93.15	34.725	31.379	19.368	168	12.43	333	437	25	989	489	17059	1415	1.634	1.912	27.633	2.261	389	127	254.3	2.29	178.6	55.5	1133	1417	349	16.96
34107	1	2	62	5	3.09		2	2	2					2	1.8	4	255	1635	51.28	242.33	101.58	19.9	55.84	16.53	22.347	12.043	92	10.46	548	619	91	652	299	8213	441	1.743	2.448	21.907	2.186	401	222	181.2	2.56	103	60	1010	998	346	14.96
34108	1	1	25	3	0.9		2	2	2		2	2	2	2	4.3	3.4	275	1346	37.17	205.33	153.41	5.2	43.92	23.578	13.257	3.997	164	24.31	715	789	138	801	0	3474	326	1.082	0.934	19.325	1.618	245	173	127.6	4.51	171.5	26.6	729	660	117	5.44
34109	2	1	47	4	5		2	2	2		2	2	2	2	1.6	3.4	257	3757	144.86	559.34	278.35	43.5	119.91	40.202	45.225	22.082	365	24.86	1365	1464	130	1088	122	23895	754	3.472	4.378	58.196	4.494	778	313	440.9	11.81	261.3	112.1	2397	2350	780	41.45
34111	1	1	44	3	3.42		2	2	2		2	1	2	1	1.7	4.8	351	2169	56.94	186.36	20.86	9.5	80.36	26.962	36.237	12.307	138	3.95	95	124	17	336	1	14631	243	1.62	1.655	28.542	1.512	369	140	378.7	2.06	15.8	34.7	1056	1133	387	11.12
34114	2	1	69	3	2.51		1	2	2					1	1.5	1.2	180	3354	51.55	626.87	371.24	14.3	77.47	17.967	33.073	20.971	207	2.18	27	33	0	78	10	1634	286	1.582	1.897	24.849	0.891	350	257	218.4	1.53	17	33.2	326	765	168	20.25
34118	1	1	39	4	3.42		2	2	2		2	2	1	2	2.2	1.8	315	2927	72.21	375.82	180.44	15.7	130.88	41.904	46.619	31.346	214	10.52	288	349	291	424	314	0	1254	1.912	1.792	24.741	1.68	468	205	258.8	2.59	245.2	139.3	1060	1146	275	16.5
34120	1	1	35	4	1.57		2	2	2		2	2	2	2	2	4.1	254	3442	163.72	302.96	106.11	28.4	174.94	60.663	69.165	28.608	1569	12.16	771	894	113	1433	30	24402	1377	2.157	3.853	24.478	2.353	643	212	1018.6	11.19	83.1	61.4	1712	2353	357	25.68
34122	2	1	73	3	2.45		2	2	2					1	1.7	3.2	282	1535	94.92	165.15	45.27	13.9	55.17	14.173	21.387	14.991	177	8.55	868	1083	854	2131	11	1417	724	1.836	2.532	33.45	3.068	529	392	333.4	9.35	23.1	69.1	1013	1452	268	19.95
34123	1	1	43	5	5		1	2	2		2	2	2	2	2.1	4.3	223	2576	96.65	227.87	102.69	20.7	118.32	35.293	43.695	28.057	267	6.95	347	406	77	473	358	2506	449	1.313	1.806	27.515	2.218	252	42	315	2.13	39.3	63.4	740	1364	316	11.39
34127	1	1	85	4	5		2	2	2					1	2.6	4.5	66	758	51.52	117.6	75.79	18.1	13.3	4.049	4.661	3.371	69	4.42	173	783	1294	6649	23	15714	6416	1.126	1.225	9.818	1.622	228	10	187.3	2.85	115.4	256.9	477	689	216	6.17
34128	1	1	51	3	4.75		2	2	2					2	2.5	8.3	357	3145	119.54	421.59	192.6	16.7	112.16	32.531	46.314	24.423	467	8.14	508	730	634	2272	127	17618	506	2.202	3.524	34.41	2.113	465	228	415.2	4.29	79.6	52.8	1171	1810	353	18.78
34129	1	2	33	1	0.8	1	1	2	2		2	1	2	2	1.2	11.1	251	2585	107.23	329.27	121.72	32.8	95.58	35.069	32.369	19.278	239	8.75	279	1503	184	14486	222	25156	964	2.007	2.103	23.016	2.388	520	182	310.6	5.33	240.4	99.8	1392	1739	422	19.72
34130	2	2	38	2	0.65	2	1	2	2		2	1	1	2	1.7	6.3	298	909	90.03	78.57	32	2	23.65	8.807	8.742	2.305	181	1.76	187	318	41	1549	1	772	70	1.002	1.511	29.736	2.638	262	197	344.1	7.52	38.2	22.7	315	816	141	16.45
34131		2	27	1	0.25	1	1	2	2		2	1	2	2	2.3	6.4	365	1694	55.58	207.32	55.63	20.1	73.85	21.913	26.858	20.053	119	7.16	174	246	37	818	3	3617	2236	1.636	1.341	15.183	1.338	493	207	229.9	1.65	192	221.6	678	844	205	13.18
34132	2	2	27	4	1.07	2	2	2	2		2	1	2	2	2.9	2.9	276	2330	80.14	373.68	209.41	20.5	60.54	23.113	16.911	13.614	213	5.83	536	564	0	341	17	18567	116	1.602	3.017	22.52	2.206	300	180	276.8	5.72	58.1	36.4	1534	1980	358	11.59
34133	2	1	61	3	2.04		2	2	2					1	2.3	1.2	235	2256	124.36	189	114.57	10.4	109.8	30.022	42.307	28.504	467	3.99	441	446	0	56	1	0	62	0.918	2.093	30.271	1.527	236	69	333	2.77	3.6	41.6	687	1329	250	10.42
34135	1	1	77	1	2.88		2	2	2					1	2.2	3.9	255	1597	100.7	163.75	91.65	10.9	62.93	23.917	24.771	9.324	587	5.97	456	641	443	1912	214	10030	820	1.198	2.666	26.703	1.378	213	77	512.2	5.91	34.6	46.4	981	1549	263	12.08
34136	1	1	29	4	3.21		2	2	2		2	2	2	2	2.4	5.6	228	1405	104.43	181.6	61.7	23.1	31.67	10.834	10.381	5.796	178	8.71	108	233	73	1133	669	6686	2599	1.113	1.31	33.942	3.449	316	0	443	5.39	245.1	114	855	1160	367	13.59
34138	1	2	78	4	1.92		1	2	2					1	1.8	3.7	221	3277	72.73	383.54	254.55	21	170.63	51.244	47.231	59.869	253	10.33	1652	1678	16	259	6	407	404	3.595	3.929	21.638	2.486	588	214	367.9	8.53	34.2	86.2	1988	1591	450	23
34141	1	1	26	5	5		1	2	2		2	2	2	1	1.9	2.3	265	3177	130.4	293.91	107.88	21.2	164.91	52.358	62.335	37.256	855	14.86	795	861	55	621	295	1	1294	1.977	2.665	36.704	2.266	507	164	602.9	5.6	154.6	114.6	1511	2091	431	17.79
34144		1	46	5	5		2	2	2		2	1	2	2	2	3.5	223	2508	94.54	291.25	165	22.6	101.87	39.378	37.343	12.406	290	4.73	477	549	113	679	271	2044	771	3.104	3.129	29.411	3.495	444	287	347.4	8.65	169.2	60.7	987	1624	348	26.46
34145	1	1	54	3	3.06		2	2	2					2	1.6	2.6	282	2475	68.63	216.12	52.25	11.3	87.69	26.698	35.146	17.962	555	5.68	336	413	154	839	37	3447	642	1.342	2.324	23.403	1.761	426	74	583.2	2.88	24.2	60.7	651	1410	301	9.31
34148	1	2	69	3	4.17		2	2	2					2	3.9	5.3	331	1407	60.02	119.36	62.73	9.3	78.98	26.914	31.196	16.688	144	7.51	384	430	14	488	107	0	202	1.298	1.614	16.449	2.807	442	369	184.6	8.19	76	35.5	494	837	165	12.84
34150	1	1	64	3	3.73		1	2	2					1	2.1	5.3	233	1208	84.34	128.7	20.17	4.3	36.72	12.685	13.52	6.112	205	1.8	43	390	33	4150	2	0	79	1.035	1.165	15.991	1.075	300	209	298.5	5.31	75.1	21.1	314	771	146	13.08
34152	2	2	50	2	3.76	2	2	2	2					1	1.9	2.5	286	1819	32.37	272.65	162.54	7.3	72.3	15.519	27.987	22.372	122	5.37	284	378	2	1114	2	7605	1393	0.849	0.81	8.24	0.397	249	140	122.6	0.32	10.1	141.1	284	694	184	11.23
34155		2	38	5	5	2	2	2	2		2	1	2	2	1.9	6.8	224	862	52.76	126.38	21.61	12.1	18.99	4.631	6.525	5.853	94	1.62	10	97	330	794	161	3	1250	2.206	1.388	17.974	1.262	324	96	213.3	0.81	26.3	25.8	185	711	190	7.79
34161	2	2	31	1	0.78	1	1	2	2		2	1	2	2	1.2	5.6	283	3789	151.89	612.82	340.59	38.6	85.14	24.852	29.53	20.291	441	15.78	126	1721	1188	17646	1859	24709	2591	3.737	2.931	50.12	5.309	766	292	590.7	4.28	777.2	204.2	2053	1802	621	29.81
34162	1	2	30	1	0.58	1	1	2	2		2	1	2	2	1.6	4.8	234	919	49.95	103.67	52.15	5.8	34.63	11.268	14.596	4.849	392	2.52	158	360	762	1937	232	3049	784	1.027	1.299	11.587	1.072	243	44	309.1	2.55	107.7	44.9	300	651	161	7.61
34163	2	1	21	4	2.87		2	2	2		2	2	2	2	1.6	5.6	411	2676	119.32	454.97	252.17	21	45.83	18.023	16.101	6.777	161	1.6	336	341	19	78	22	0	700	6.533	7.491	45.976	3.535	376	74	438.9	6.25	98.8	24.2	2113	1957	484	45.03
34165	1	2	52	3	3.25	2	1	2	2					1	3.1	3.5	347	870	21.48	103.72	56.47	4.8	24.53	8.863	6.712	6.337	33	4.58	147	157	5	124	0	0	161	0.296	0.372	7.192	1.228	87	12	126.8	3	0.1	24.8	149	312	122	4.56
34167	2	2	81	1	0.86		1	2	2					1	1.8	7	371	1111	26.2	184.27	109.7	6.7	32.06	7.294	11.684	9.384	32	6.5	406	769	0	4351	0	0	10	0.962	0.887	12.278	0.878	173	147	125.3	1.87	41.5	31.2	436	775	179	10.05
34169	1	2	26	5	2.49	2	1	2	2		2	1	2	2	1.6	4.2	271	2703	166.77	312.74	271.46	9.5	88.65	47.179	29.764	3.578	430	2.6	1458	1600	5	1537	474	0	175	2.463	5.626	23.676	3.253	336	0	767.4	16.52	483.5	24.1	3791	3146	473	9.01
34173	1	1	78	3	1.29		2	2	2					1	2.2	5.4	316	1491	41.95	225.2	161.07	4.7	48.24	17.278	15.786	9.746	144	5.94	420	456	24	380	144	5112	328	1.065	2.07	10.661	0.837	299	145	203	3.99	82.2	52.5	1042	1100	207	6.67
34176	1	2	45	1	1.66	2	1	2	2		2	1	2	1	2.3	3.9	450	1546	41.75	163.19	61.21	10.2	82.78	30.814	31.469	15.991	144	6.38	228	238	10	105	17	3	434	0.711	0.877	8.89	0.519	196	86	131	1.26	10	24.2	600	804	202	5.87
34180	2	2	46	2	2.05	2	1	2	2		2	1	1	1	3.2	4.4	390	814	60.71	71.77	18.91	5.2	30.22	8.788	13.199	5.092	190	2.47	255	447	5	2296	1	565	3957	0.994	0.789	18.505	1.19	189	89	210.5	2.43	15.8	195.1	252	813	105	7
34183	2	2	44	3	1.17	2	1	2	2		2	1	2	2	2.5	2.5	300	1275	30.72	233.34	166.49	7.4	26.92	8.942	8.429	6.8	90	3.16	195	232	23	443	1	5112	411	0.629	1.09	7.946	0.572	127	64	128.3	2.18	12.1	51.7	556	705	131	5.39
34186		2	60	3	4.22		2	2	2					1	2.9	6.5	305	2781	96.64	230.28	86.5	24.5	176.05	37.486	81.076	47.364	79	25.07	570	601	6	283	185	8841	223	2.203	2.136	45.221	2.366	538	125	249.5	4.99	50.8	39.3	1009	1837	543	16.92
34203	1	1	52	4	2.26		1	2	2					2	2	3.9	256	3172	104.4	431.4	130.85	22.5	96.54	35.006	32.529	19.452	194	11.92	191	292	62	1187	4	34218	529	2.805	3.418	39.849	1.754	720	425	312.9	4.21	55.2	83.7	1022	1411	341	24.4
34205	1	1	47	3	3.73		2	2	2		2	2	2	1	2.4	4.7	351	4144	155.37	382.14	209.76	22.1	200.34	78.149	75.143	27.819	831	10.28	684	776	91	770	552	7430	958	2.001	4.05	60.725	6.034	456	107	775.8	14.02	357.4	85.3	906	1850	446	22.17
34206	1	2	32	4	1.81	2	2	2	2		2	1	1	2	2.5	4.9	439	1697	59.65	193.92	97.61	7.4	78.02	31.486	27.796	10.863	169	4.81	348	360	1	160	4	462	115	1.458	1.677	12.538	0.775	177	103	181.4	2.94	22.6	25	1198	1331	197	10.31
34207	1	1	46	5	2.33		2	2	2		2	1	2	1	1.2	4.6	287	2184	52.24	204.36	34.93	3	41.82	7.965	12.143	18.985	98	2.28	55	59	4	46	11	1	147	0.722	1.312	28.122	1.824	321	99	414.4	2.22	0.2	30.7	577	943	315	6.97
34208	1	1	38	1	2.43		1	2	2		2	1	2	2	2	2.6	234	4917	138.26	730.78	388.21	38.6	166.53	63.809	58.269	35.071	313	9.46	680	797	24	1284	197	6964	816	3.478	5.428	48.106	4.117	888	383	304.6	9.86	377.5	101.2	3009	2821	463	27.04
34209	1	2	58	3	4.92	2	2	2	2					2	2.3	4.6	262	1423	83.39	208.94	41.85	11.7	27.59	8.373	9.592	6.579	153	5.65	219	277	13	703	0	32326	30	1.673	1.905	33.047	1.928	501	383	235.2	4.32	25.8	25.6	419	953	230	18.82
34212	2	2	50	2	3.62	2	2	2	2					1	2.4	3.1	292	2066	88.38	233.33	129.13	6.6	88.31	22.709	30.41	28.294	260	12.35	237	550	43	3672	99	547	7674	0.853	1.272	35.139	2.982	309	100	251.7	7.54	91.3	378.5	570	1143	189	10.33
34213	1	1	78	5	5		2	2	2					1	1.6	7.7	215	1502	53.82	185.51	84.95	15.3	65.53	17.216	20.81	20.324	106	9.67	142	264	297	1219	181	2443	948	0.83	1.329	16.339	1.55	222	57	237.5	3.79	76.2	115.1	588	892	268	11.34
34214	1	1	33	4	3.51		2	2	2		2	2	2	2	2	3.2	185	2457	55.17	271.86	175.26	7.8	82.11	29.181	25.993	20.291	393	5.75	146	427	1005	2850	35	3147	465	1.856	1.592	16.371	0.963	276	107	235.4	1.53	38.1	87.4	637	834	232	8.49
34219	1	2	26	5	1.95	2	1	2	2		2	2	2	2	2.6	8	366	1881	65.79	272.87	208.56	10.4	63.08	26.054	19.618	9.966	195	5.54	405	749	94	4082	8	2316	4151	0.8	1.736	15.561	1.12	247	29	212.3	3.16	35.1	258.7	1094	1132	212	9.9
34220	1	1	50	3	2.57		2	2	2					2	1.3	1.8	378	2090	67.17	212.39	110.33	7.6	101.87	29.031	36.491	28.184	509	6.44	239	264	32	276	10	1205	553	1	1.497	22.206	1.196	272	145	369.3	2.95	5.2	43.4	514	899	161	11.86
34223	1	1	60	1	0.81		1	2	2					1	1.6	5.2	253	1849	69.22	251.62	154.09	21.8	65.93	18.157	24.797	18.335	174	4.92	136	256	151	1237	278	3893	735	0.988	1.562	13.895	1.13	469	46	229.6	1.46	125.8	53.1	827	1016	255	11.05
34226	1	2	24	5	5	2	2	2	2		2	2	2	1	1.1	2.8	266	1133	34.4	186.59	89.14	11.2	20.63	7.382	6.94	4.136	48	3.29	95	154	45	688	24	12345	541	0.739	1.089	14.488	0.871	220	125	131.4	1.66	39.8	28.5	447	674	263	8.1
34227	1	2	27	3	5	1	2	2	2			1	2	1	2.5	8.8	447	2117	60.28	320.34	187.36	15.1	69.39	20.982	30.762	10.695	355	12.87	259	339	62	458	928	5872	1014	1.499	1.69	16.57	1.787	363	143	298	2.52	232.8	21.9	579	1207	292	13.62
34228	1	2	53	4	0.48	2	2	2	2					2	1.5	3.8	209	2441	109.28	233.38	107.32	31.9	125.83	42.242	54.122	20.6	378	8.5	427	516	61	987	21	808	937	1.285	2.046	32.782	1.832	365	102	382	2.05	156.1	150	999	1724	579	18.35
34231	2	1	44	5	2.06		1	2	2		2	2	2	2	1.3	1.6	247	1796	46.03	252.75	67.83	27.9	70.43	18.055	26.293	20.938	83	6.36	85	99	16	164	20	387	264	1.078	0.783	10.388	1.22	351	48	153.8	0.9	24.3	72.6	489	996	347	10.04
34233	2	1	81	1	2.96		1	2	2					2	1.1	4.9	205	2092	76.79	285.6	138.8	19	74.4	21.586	28.096	18.568	320	10.44	1690	1719	1	401	6	0	410	2.691	3.1	31.433	2.225	330	114	426.9	4.92	231.2	73.9	859	1374	367	18.29
34234	1	1	65	1	0.66		1	2	2					2	2.1	4.4	259	1235	57.43	156.87	68.64	9.5	42.74	11.48	13.739	13.991	144	2.96	156	199	18	503	7	15146	337	0.912	1.413	21.544	1.262	183	119	195	1.75	45	26.5	625	853	179	7.94
34235	1	2	43	4	1.06	2	2	2	2		2	2	1	2	1.7	12.9	416	2326	60.27	374.38	261.14	16.7	74.9	35.141	22.989	11.985	215	2.74	394	459	46	495	327	440	1708	1.569	1.227	14.651	1.255	223	59	255.1	1.7	406.3	36.1	657	1043	216	8.27
34236	2	2	23	1	0.65	1	1	2	2		2	1	2	2	2	5.8	214	2140	62.52	362.81	236.15	12.1	54.4	23.525	18.733	6.836	194	2.66	484	551	46	519	545	0	854	2.001	3.024	23.723	3.14	458	279	223.8	10.07	171.3	31.8	1346	1284	236	23.53
34240	2	2	33	2	0.97	1	1	2	2		2	1	2	2	1.9	6.9	305	2155	127.87	201.48	74.54	25.7	97.7	49.994	31.277	7.079	371	2.84	618	662	103	487	18	0	224	0.711	2.24	19.952	2.829	129	0	409.3	7.11	38.7	29.7	2140	2432	451	9.62
34245	1	1	51	3	2.43		2	2	2					2	1.9	3.9	305	3813	128.09	478.03	126.55	26.7	166.61	53.236	64.418	38.753	190	17.92	398	429	9	360	0	18177	172	2.937	3.976	44.855	1.916	1022	444	310.1	5.22	21.3	50.2	1575	1939	627	35.8
34248	2	2	83	3	1.53		1	2	2					2	1.4	3.5	382	1713	63.76	185.06	65.83	13.4	84.02	25.643	28.881	26.239	128	5.76	244	250	0	62	0	0	127	1.169	1.519	22.701	1.23	282	135	157.6	2.98	2.1	23.6	841	1063	238	14.9
34249	1	2	81	3			2	2	2					1	1.6	2.9	170	1848	61.35	144.2	58.74	11.3	117.74	26.905	39.243	45.056	112	12.58	33	64	16	335	33	1418	513	1.424	1.829	23.053	1.482	152	26	226.8	1.96	18.2	142.1	333	907	211	9.87
34250	1	1	48	5	3.57		2	2	2		2	2	1	1	2	3.6	281	2452	130.32	143.74	40.58	7.4	118.04	33.43	48.347	27.345	298	8.61	839	853	0	158	35	0	123	1.145	2.561	42.263	3.096	362	114	470.4	5.92	0.5	22	1251	1926	353	13.64
34254	2	2	51	2	0.91	2	1	2	2					2	1.1	3.8	266	1602	60.85	230.62	163.01	7.8	51.21	11.885	21.434	14.288	182	7.37	37	700	0	7947	6	0	14697	0.902	0.842	14.447	0.861	140	41	167	2.49	130.2	664.4	407	808	134	9.57
34256	1	1	48	1	2.25		1	2	2		2	1	2	2	2.7	2.7	316	1374	84.22	102.84	12.93	14.2	46.8	12.507	22.253	7.424	201	3.69	36	87	94	545	22	7475	376	0.662	1.114	22.969	1.643	333	18	323.5	2.74	19.1	39.1	262	1006	264	8.91
34266	2	1	76	1	0.84		1	2	2					1	2.4	3.7	240	967	49.2	92.28	49.67	2.6	44.26	16.745	16.212	6.099	555	2.68	269	323	29	191	795	4	947	0.699	1.099	10.993	0.969	199	47	305.1	2.01	182.2	7.6	242	564	119	7.94
34268	2	2	25	2	0.62	1	1	2	2		2	1	2	1	2.7	7.3	279	1044	53.05	135.54	79.04	4.4	33.13	7.445	11.528	10.654	452	3.18	146	171	4	309	8	0	595	0.604	0.879	17.225	1.011	150	60	297.6	1.51	8.9	46.7	281	655	108	6.84
34270	1	2	22	4	2.47	1	1	2	2		2	2	2	1	1.6	5.6	309	3001	88.29	380.83	214.22	12	128.85	46.67	49.138	21.752	244	6.7	848	875	2	327	9	3	137	2.04	3.05	15.347	1.367	383	245	295.6	6.44	6.7	50.6	1795	2051	295	10.47
34273	1	1	35	5	5		2	2	2		2	1	2	2	2.3	3.2	291	2493	120.07	252.78	45.05	15.6	108.61	43.246	38.136	19.383	491	4.06	726	743	2	205	2	2508	179	1.93	1.84	42.061	1.923	514	330	373.5	5.62	11.9	46.1	715	1339	257	18.32
34281	1	1	83	3	1.95		1	2	2					2	0.7	2.4	267	1509	58.65	202.7	87.54	22.1	55.76	14.532	17.347	19.152	100	4.62	286	416	409	1345	60	12236	387	1.153	1.675	13.775	1.643	241	101	233.1	4.71	33.7	33.4	698	1027	259	14.64
34283	1	2	44	3	4.68	2	2	2	2	2	2	1	2	1	1.8	5.5	250	1045	40.37	98.43	51.68	3.9	40.36	19.257	14.633	4.456	123	1.13	368	380	4	157	3	1749	92	0.92	1.593	6.913	0.455	139	88	156.8	4.2	3.2	22.9	838	773	117	6.96
34284	1	1	57	4	5		2	2	2					2	2.2	4.8	283	2470	118.33	271.57	131.33	15.7	106.12	54.006	32.081	12.357	432	4.47	1093	1276	12	1998	347	0	3492	2.416	3.907	32.978	2.8	525	284	334.7	11.46	129.7	181.7	2244	2288	417	25.28
34288	2	1	83	1	1.87		1	2	2					1	1.6	7	193	2768	61.19	418.87	230.69	12.8	98.61	27.421	33.407	29.79	414	6.91	294	379	251	868	28	8241	492	1.319	2.448	16.14	1.006	360	209	373.2	1.61	26	117.5	806	1552	206	15.09
34289	1	1	61	3	2.71		2	2	2					1	2.6	5.8	229	1895	69.79	251.71	78.54	15.7	65.98	23.841	25.408	14.855	169	3.69	246	711	2055	4550	3	0	747	1.248	1.988	25.722	1.557	290	125	233	1.99	12.1	38.9	606	1183	270	11.6
34291	1	1	26	2	0.6		2	2	2		2	1	2	1	2.4	8.1	278	5961	154.83	1027.58	656.5	30.1	128.86	42.602	53.387	22.385	494	9.43	719	791	26	606	6	14662	696	3.284	4.861	68.028	6.624	628	320	654.2	14.36	94.6	49.6	1417	2962	483	48.19
34292	2	2	49	5	0.9	2	2	2	2		2	1	2	2	2.3	2.6	218	2223	87.14	265.56	98.18	16.2	92.34	39.594	32.317	19.396	139	7.09	310	337	41	303	5	1029	540	1.511	2.113	22.845	1.256	443	237	206.2	5.54	13.6	36.4	1374	1556	306	14.05
34293	1	2	75	2	5		2	2	2					2	2.4	3.7	313	1488	76.24	171.21	76.26	19	49.45	12.922	15.017	17.495	193	6.73	118	208	50	903	270	0	1153	1.254	1.902	23.729	1.634	360	111	273.8	1.95	176.9	127	807	1148	262	10.59
34295	2	1	28	5	3.73		2	2	2		2	1	2	2	2.3	3.4	168	4112	137.89	472.86	228.29	15.6	188.64	63.619	79.689	28.529	769	9.81	821	898	30	543	682	9069	1128	2.756	3.395	39.359	2.705	540	260	552.9	8.65	215	141.4	1996	2446	345	27.54
34296	1	1	51	5	5		2	2	2					2	1.9	6	333	1983	48.26	360.48	180.05	18.3	46.11	14.255	20.502	7.25	40	4.57	106	233	12	1481	87	0	810	1.494	1.547	14.278	0.924	361	232	123.6	1.29	192.1	61.1	793	938	316	11.41
34300	2	1	81	3	1.09		1	2	2					1	1.7	2.7	182	2232	54.22	288.92	124.28	16.3	98.06	40.061	37.568	13.393	180	9.83	328	393	66	631	198	8947	418	1.299	2.019	16.645	1.174	380	227	226.7	2.15	68.2	82.2	669	1073	209	11.88
34302	1	2	21	4	5	2	2	2	2		2	2	2	1	2.5	4.5	392	2265	52.45	361.69	164.82	9	70.76	29.851	19.629	14.541	114	6.77	341	350	0	100	10	0	80	1.288	1.732	15.107	0.986	203	68	120.2	2.12	17.4	32.8	1134	1220	196	12.85
34303	1	1	49	1	0.83		2	2	2		2	2	1	1	3.3	5.9	323	5480	247.6	557.56	289.08	26	251.54	77.507	88.715	43.021	1343	18.5	785	848	2	672	205	0	1236	2.247	4.295	68.008	4.989	418	106	1008.7	21.81	156.3	128.5	1816	3322	604	33.61
34305	1	2	36	2	0.6	2	2	2	2		2	1	2	1	1.7	3.4	261	2163	80.96	174.83	68.35	6.2	126.33	48.361	42.192	25.012	250	5.1	300	312	0	142	5	1671	168	1.256	1.682	15.385	1.036	293	148	225.4	4.7	26.2	35.7	1080	1210	152	13.58
34306	2	2	67	3	2.8		1	2	2					2	2.7	3.4	347	1693	71.37	203.87	94.88	19.6	68.87	23.747	26.673	13.897	162	7	409	669	953	2635	114	96	1627	1.283	1.885	20.955	1.519	238	59	228.6	1.92	204.5	48.8	856	1071	303	9.94
34307		1	23	2			2	2	2		2	1	2	1	1.9	6.9	406	4344	82.72	492.94	250.49	12.5	101.47	33.227	44.365	18.383	326	3.61	207	245	42	439	10	996	279	1.821	2.113	28.936	1.926	519	239	447.8	5.09	16.9	66.2	744	1364	291	18.68
34310	2	2	40	2	0.6	2	2	2	2		2	1	2	1	2.9	7.6	274	2161	99.93	238.24	134.74	7.5	91.07	27.88	38.264	18.369	536	5.9	648	740	162	910	217	2319	926	2.416	2.02	22.36	1.597	252	109	471.2	4.95	19.8	90.6	1134	1736	189	11.77
34311	1	1	48	2	5		1	2	2		2	1	2	1	2.1	5.9	218	4071	132.1	354.89	56.96	16.4	108.39	44.021	40.481	8.284	296	6.08	209	287	53	914	16	10634	291	1.194	2.581	45.046	3.622	506	100	778.1	10.02	44.2	48.7	1247	2008	590	18.54
34312	1	2	42	5	1.07	2	2	2	2		2	2	2	2	2.5	4.1	239	3262	114.68	475.77	172.82	19.1	101.39	42.16	33.286	16.21	205	6.83	765	1193	41	5119	2	10353	237	3.021	3.728	32.944	1.843	855	610	199.8	5.91	246.2	49.5	2309	2072	366	25.76
34313	2	1	78	3	3.21		2	2	2					1	1.4	5.2	193	2391	117.95	324.82	60.5	30.2	74.69	21.362	25.821	20.913	460	6.15	474	527	48	572	103	0	690	2.475	2.41	38.249	4.024	372	107	602.6	6.33	102.6	115.4	818	1704	412	16.07
34319		1	63	1			1	2	2					2	1.5	1.9	153	975	57.24	129.73	40.62	16.1	26.02	5.835	8.78	8.147	309	3.71	201	241	15	480	10	0	2096	1.023	1.171	14.305	1.229	307	99	280.8	1.59	61.1	184.9	344	631	156	10.19
34325	1	1	34	2	1.19		2	2	2		2	1	2	2	2.3	4.4	217	2398	101.36	268.26	86.62	10.6	102.63	37.199	32.644	23.663	297	11.5	403	427	0	290	0	6463	97	1.632	1.795	26.561	2.621	350	191	312.9	8.48	36.6	58.2	755	1189	218	16.2
34326	1	2	44	4	5	2	2	2	2		2	2	2	2	1.9	3.1	262	2208	81.1	348.29	104.21	45.6	59.33	13.749	17.944	21.98	124	14.28	166	326	252	1745	53	25067	1465	2.634	2.079	25.999	2.752	556	195	313.8	3.48	93.1	82.9	1034	1431	363	19.65
34329	1	2	80	3	0.76		1	2	2					1	2	5.5	274	1166	63.73	131.55	45.87	6.3	42.6	14.955	16.545	6.984	183	3.3	173	207	15	168	458	0	392	1.029	0.742	16.419	1.604	146	15	270.4	4.12	135.8	18.2	616	706	203	8.61
34333	1	1	44	3	5		2	2	2		2	2	1	2	2.2	5.1	355	2094	51.76	319.86	189.49	17.1	69.76	23.97	34.87	6.445	102	5.71	369	470	109	1154	22	10975	999	1.314	3.269	17.679	1.31	355	67	199.4	2.08	26.3	119.1	719	811	224	13.47
34335	1	1	26	3	2.48		1	2	2		2	2	2	2	2.4	4.3	297	2658	178.24	319.43	121.56	17.1	73.8	26.174	28.17	9.783	427	5.09	609	635	42	215	189	0	1445	2.375	3.034	51.303	4.348	624	420	614.6	13.16	50.7	32.6	950	1820	348	29.54
34336	1	1	35	5	5		2	2	2		2	1	1	2	2.8	3.7	300	2833	119.91	326.47	120.91	19.1	110.16	34.057	40.066	25.128	1004	16.56	1746	2282	1846	5287	504	31533	1513	2.67	4.116	39.055	3.486	677	353	773.7	8.24	147.2	90.1	1860	2313	371	26.39
34338	1	1	41	5	4.11		1	2	2		2	1	2	2	1.3	2.6	282	3095	119.75	386.67	163.05	21.2	121.33	41.07	43.647	27.347	665	7.4	713	804	60	627	930	8127	1369	2.232	3.028	21.758	2.161	509	220	519.4	7.62	429.7	50.5	1772	2052	423	18.99
34343	1	2	33	4	2.35	2	2	2	2		2	2	2	1	2.4	3.1	270	2999	97.99	352.07	231.01	30.4	141.13	54.541	49.216	27.074	272	9.17	775	902	0	1498	12	0	1482	1.349	3.067	24.509	2.563	585	78	626.1	5.4	436.4	888	1698	1850	542	11.75
34344	2	2	50	5	5	2	2	2	2					2	2.8	7	318	2726	119.12	268.57	81.19	31.1	136.33	43.82	57.282	22.552	516	12.5	373	412	34	456	9	5424	549	2.038	2.634	28.808	1.889	477	143	470.8	3.96	23.1	65.5	1053	1790	509	17.9
34353	2	2	64	3	2.7		1	2	2					2	2.6	1.9	381	2186	126.53	230.22	150.54	24.1	86.91	31.602	36.061	9.626	276	4.56	220	231	0	162	8	1762	144	1.392	2.037	27.696	2.632	297	144	487.7	8.15	91.4	31	623	1282	267	20.59
34354	1	1	34	5	2.77		2	2	2		2	2	2	2	1.6	2.1	259	4771	98.24	659.52	354.33	42.5	211.67	69.688	79.387	50.01	194	12.03	309	369	74	544	53	5026	1000	2.753	2.888	26.057	2.223	741	222	342.5	3.99	427.7	37.1	1470	2062	647	25.99
34355		1	33	3			1	2	2		2	1	2	2	1.7	3.3	352	2055	69.08	287.48	87.96	10.5	69.27	15.589	27.779	21.385	168	3.79	74	90	25	180	1	612	218	1.292	0.719	26.282	1.922	325	224	187.2	0.69	18.6	42.3	212	806	167	11.59
34356	1	1	48	3	2.98		2	2	2		2	2	1	1	3.2	2.9	233	692	29.2	74.31	39.29	12.6	33.34	11.135	13.91	5.69	59	3.1	37	81	21	506	36	1184	521	0.497	0.812	8.169	0.543	97	12	118.4	1.2	14.5	31.1	376	423	158	3.91
34358	2	2	27	3	1.69	1	2	2	2		2	1	2	2	2	8	199	2233	112.23	237.67	104.84	18.8	94.59	32.197	33.042	20.916	283	6.77	495	617	97	1321	240	1029	513	2.655	3.227	35.012	2.995	597	383	371.5	6.68	171.7	40.4	1621	1793	337	16.1
34361	1	2	85	1	1.46		1	2	2					1	1.1	12	173	1041	37.96	159.16	87.81	13.1	19.02	4.598	5.73	7.067	60	23.96	646	809	47	1733	265	0	1883	2.597	3.548	35.389	4.192	783	434	223.1	8.93	203.6	306.7	843	798	312	28.2
34363	1	1	25	1	1.76		1	2	2		2	1	2	2	1.9	6.1	193	2112	74.68	351.35	198.44	18.2	41.45	11.121	14.897	10.68	331	6.14	176	316	82	1537	246	21088	552	1.076	1.172	17.612	1.274	273	131	328.7	3.76	43.5	54.2	531	1331	301	15.55
34365	1	1	31	4	1.86		2	2	2		2	2	2	1	2.1	2.7	184	4166	198.85	484.12	223.44	26	159.39	49.373	51.77	43.891	555	16.79	472	580	10	1254	8	70250	569	3.151	7.812	94.961	7.598	649	424	808.8	19.74	80.8	214.9	1822	2668	450	33.25
34370	1	2	25	5	1.67	2	1	2	2		2	1	2	2	2.2	3.5	203	1961	53.97	310.19	166.84	11.7	58.68	25.275	21.852	5.994	171	4.4	443	501	23	337	639	4437	747	1.382	1.486	15.082	1.389	329	152	170.7	2.67	500.3	23.2	967	918	180	12.82
34371	1	2	35	5	4.07	1	2	2	2		2	2	2	2	1.3	6	259	2542	111.58	390.5	204.52	35.5	68.01	17.586	31.272	14.2	173	27.94	845	1170	1291	3195	8	0	723	3.517	5.61	52.101	5.1	929	657	376.7	15.36	50.8	55.5	1945	2351	579	50.69
34374	1	2	34	1	0.23	2	1	2	2		2	1	2	2	1.5	2.7	353	1740	71.23	229.43	142.26	9.7	60.68	19.666	24.069	10.573	172	2.13	42	43	0	9	0	0	13	1.082	1	11.137	0.714	225	101	223.4	4.65	84.6	22.2	474	813	144	11.45
34375	2	2	75	3	1.43		1	2	2					2	1.4	3.8	244	1403	75.38	136.7	55.71	9.4	61.24	15.579	23.037	17.474	511	7.51	183	196	4	198	13	0	657	0.947	1.585	22.861	1.3	224	80	361.2	2.26	295.3	73.9	318	894	198	10.55
34377		2	24	2	0.01	2	2	2	2		2	1	2	1	4.4	8.1	379	2363	149.32	196.82	117.43	8	97.79	32.024	37.094	7.555	579	4.26	275	315	73	438	7	3413	280	0.817	1.922	37.032	2.313	169	49	534.7	12	33.8	38.1	633	1599	229	18.71
34379	2	2	85	2	1.17		1	2	2					2	2.2	2.9	189	1008	31.37	201.75	131.82	12.8	12.18	3.237	3.344	4.345	31	6.74	158	453	344	3112	556	1181	2362	0.82	0.951	10.756	1.044	307	41	166.9	2.01	251.1	39.3	570	492	197	10.43
34380	9	2	56	1	0.1	2	1	2	2					2	2.9	4.9	215	2332	71.32	358.63	182.91	38.5	75.36	23.378	24.452	22.423	145	9.62	180	502	160	3685	241	6773	3402	1.255	1.512	17.016	1.747	438	54	277.7	1.52	76.8	219.8	822	1561	392	16.1
34383	1	2	34	5	5	1	2	2	2		2	1	2	2	1.7	8	239	2456	71.02	389.03	173.55	22.3	74.06	30.776	26.552	10.845	167	6.96	942	2225	5242	12641	291	326	882	1.95	2.705	26.563	2.755	328	111	268.1	6.71	156.6	47.9	1562	1790	332	19.83
34387	1	1	34	2	2.45		1	2	2		2	1	2	1	1.7	4.6	216	2250	51.35	397.28	184.43	37	58.93	20.532	23.129	10.229	76	9.8	277	1167	3355	8967	75	7234	2770	1.796	2.187	20.633	3.124	563	169	229.3	3.08	208	248.3	1141	1369	376	15.85
34391	1	1	38	4	4.91		2	2	2		2	2	2	2	2	3.7	226	3273	134.73	315.28	127.17	9.4	120.71	48.575	44.156	19.058	782	5.88	614	639	8	198	197	692	647	1.969	3.26	28.464	2.228	473	128	718.1	25.33	97.3	29.6	2491	2677	566	16.71
34393	1	1	69	3	4.18		2	2	2					1	2.1	4.9	211	3064	91.79	328.3	192.47	16.1	159.57	65.42	52.355	28.285	326	7.78	700	1219	2092	5118	194	0	1671	2.816	3.58	34.613	3.632	454	249	382.9	9.96	79.9	121.4	1273	1565	296	20.6
34394	1	1	35	2	0.81		1	2	2		2	2	2	1	4.7	5	338	1136	29.79	163.1	80.03	3.7	41.37	17.751	13.959	6.44	82	2.48	146	159	0	148	0	7241	40	0.858	1.282	8.124	0.243	158	101	74.7	1.11	7.1	16.5	458	543	76	6.61
34395	1	1	41	5	4.8		1	2	2		2	1	2	1	3.2	2.9	232	1563	40.42	251.91	73.22	15.1	46.34	11.566	16.871	12.157	172	4.47	164	192	38	295	17	4309	568	1.541	1.714	13.531	1.197	322	224	161.9	0.98	24.2	40.6	397	997	144	11.36
34396	1	2	69	2	2.09		1	2	2					1	1.8	3.5	268	1882	81.86	247.04	103.21	14.2	65.22	15.611	31.933	13.759	166	5.65	109	122	0	144	4	0	40	1.336	1.273	29.921	1.811	225	98	234.8	2.15	31.2	35.5	585	1202	258	9.5
34398	1	1	45	3	3.44		2	2	2		2	1	2	2	1.4	5.1	257	2230	99.98	293.69	189.64	6.1	75.59	23.069	30.463	15.517	295	2.28	178	186	0	71	1	835	61	0.949	0.949	36.234	2.196	146	89	233.6	2.31	15.7	26.8	299	1029	146	10.55
34401	1	1	30	4	2.41		2	2	2		2	1	1	1	2.1	5.4	275	2155	61.01	269.46	88.06	16.9	52.89	21.381	16.608	11.449	71	5.02	39	165	0	1334	362	835	237	1.692	1.115	30.151	1.723	345	19	305.3	0.53	168.8	26.9	889	978	369	8.93
34402	2	2	28	3	1.02	1	1	2	2		2	1	2	2	2.5	6	289	2025	68.63	283.24	108.56	25.5	72.84	23.829	30.828	12.434	141	5.3	300	337	86	228	375	0	233	1.071	1.485	10.327	1.067	268	88	264.5	4.32	38.2	37	858	1677	292	11.79
34405	1	1	57	5	5		2	2	2					2	2.2	3.7	202	1853	83.1	179.43	91.95	11.8	90.26	35.948	29.767	17.073	207	4.07	549	673	166	1176	437	3395	732	1.578	2.291	12.995	1.41	314	99	284.9	5.09	117.9	53.6	1705	1549	267	9.74
34406	1	2	31	4	0.81	2	2	2	2		2	1	2	2	3.3	4.7	319	1100	43.46	155.92	83.88	6	34.6	14.358	11.388	5.76	92	2.21	201	224	23	287	2	6762	250	0.85	1.276	9.327	0.597	155	71	120	2	62	19.8	779	828	128	8.21
34408	1	1	56	5	0.89		2	2	2					1	1.7	9	225	1892	79.11	214.51	50.9	18.2	83.47	22.179	29.884	26.213	157	5.32	624	652	57	316	3	0	551	1.839	2.388	37.154	3.437	588	450	208.6	8.1	24.1	52.1	760	1358	323	38.75
34410	2	2	29	5	1.25	2	2	2	2		2	2	1	2	3.1	3.5	521	1661	56.83	232.02	157.37	5.9	57.84	14.135	26.449	12.262	225	4.2	552	588	10	419	10	3	593	1.171	1.076	15.785	0.977	193	72	230	2.91	69.5	61.7	322	830	145	10.02
34411	1	2	49	4	5	2	2	2	2		2	1	1	1	3.2	5.7	353	1168	56.39	160.51	59.18	14.5	35.23	12.852	14.897	4.827	117	2.81	403	461	62	568	215	6093	489	1.179	1.478	21.243	1.912	405	189	172.1	3.64	114.1	33.8	709	886	263	20.09
34415	1	1	35	4	5		1	2	2		2	1	1	2	2.2	3	370	7382	415.9	588.66	239.39	36.3	336.53	103.442	135.411	70.922	2030	26.9	1789	1917	373	1106	334	0	2359	5.145	6.455	95.979	6.039	803	242	1733.4	18.9	110.3	39.7	3192	5817	1292	50.81
34418	1	1	63	3	4.77		2	2	2					1	1.6	6	205	1559	64.81	176.04	11.69	15.2	54.88	17.035	15.56	16.443	146	3.95	217	230	26	158	1	403	489	1.802	1.373	15.247	0.749	473	209	203.9	2.57	3.3	53.7	840	1142	222	11.18
34419	2	1	60	1	2.27		1	2	2					1	2.5	5.6	166	2306	107.5	297.07	185.84	22.3	79.33	29.125	28.253	13.98	448	6.73	311	871	2069	5477	358	657	1731	1.26	3.047	32.046	2.038	366	76	490.9	2.95	60.9	93.2	679	1591	354	16.21
34424	2	2	27	3	1.24	1	2	2	2		2	1	2	1	1.8	3.8	253	1295	58.29	165.09	83.48	13.6	46.22	12.991	20.587	9.188	123	3.56	91	177	241	935	10	5013	246	0.668	0.903	17.599	1.757	208	7	277.7	2.18	128.3	69.3	519	873	202	6.97
34427	2	2	74	1	1		1	2	2					1	2.3	4.3	265	841	29.4	126.43	51.36	6.2	25.7	5.705	8.931	9.04	64	2.41	208	239	20	248	221	1504	407	1.062	1.289	15.813	1.312	262	170	106.7	3.28	82.2	20.8	386	287	116	11.45
34434	1	2	26	2	0.39	2	2	2	2		2	1	2	1	4	7.3	329	2254	75.93	235.34	22.81	6.5	81.45	27.079	31.491	13.867	507	4.23	306	313	1	83	8	1418	336	1.462	1.995	25.331	1.248	435	281	424.2	2.45	3.9	21.5	575	1210	235	16.24
34435	1	2	70	4	1.99		2	2	2					1	1.8	3.4	245	2066	85.29	234.34	69.03	13.6	88.26	19.634	32.372	30.72	177	17.08	712	766	39	417	432	626	598	2.284	2.527	38.202	5.337	1044	881	279.3	15.13	151.1	67	765	1203	247	25.26
34437	1	2	37	4	4.16	2	2	2	2		2	1	1	1	1.4	3.8	238	1446	66.94	135.59	23.59	14.9	72.82	24.892	28.786	12.205	182	6.7	444	471	10	292	13	3261	142	0.872	1.138	15.234	1.187	260	82	188.6	2.95	6	41.7	630	857	262	12.18
34438	1	1	25	3	0.78		2	2	2		2	1	2	1	1.6	2.4	237	3165	101.96	456.58	248.49	14.2	105.45	34.46	42.618	19.392	201	6.49	108	165	59	643	6	15961	433	2.235	1.953	33.948	1.245	439	287	247.9	2.4	188.8	51.3	1034	1416	216	19.8
34443	1	1	20	3	1.67		1	2	2		2	1	2	2	1.8	6.2	258	1286	48.22	175.42	111.73	8.1	44.58	9.862	17.215	13.201	133	8.38	47	213	482	1769	1	0	526	0.433	0.616	20.602	1.083	142	43	165.6	0.99	21.3	71.1	269	681	188	6.1
34444	2	1	29	4	0.83		1	2	2		2	1	2	2	1.5	5.2	346	2081	55.7	338.65	171.92	8.2	58.59	19.841	25.378	7.403	134	2.97	350	503	633	1537	6	4380	226	1.359	1.535	23.569	1.843	232	174	184.2	4.19	48.5	21.4	502	1115	152	16.64
34450	1	1	49	3	1.84		2	2	2	1	2	2	2	1	2.3	5.2	350	1735	33.58	141.87	36.7	4	47.04	12.262	18.58	12.864	222	3.28	121	124	0	32	4	0	187	1.19	2.136	12.283	0.423	223	128	230.1	1.07	0.8	13	431	731	149	9.2
34454	1	1	35	3	1.43		2	2	2		2	2	2	1	2.1	3.8	283	2525	70.08	327.61	195.73	6.9	77.78	22.836	31.001	15.912	164	6.52	40	52	47	121	0	0	61	1.286	1.366	23.546	1.694	240	109	271.8	1.31	9.7	35.5	431	994	241	11.63
34457	1	2	44	4	5	2	2	2	2		2	1	2	1	1.8	7.1	418	2681	108.26	215.16	111.41	7.3	97.34	27.268	32.026	29.032	360	8.42	537	851	1236	3174	0	3365	255	0.974	2.748	24.684	2.291	172	74	312	4.59	7.1	68.4	983	1556	248	8.87
34461	2	2	65	1	2.21		2	2	2					2	2.6	3.7	337	422	19.73	52.78	2.7	4.5	14.97	3.669	6.375	3.72	199	1.28	62	63	0	4	4	0	176	0.379	0.602	5.614	0.301	100	55	128.8	0.54	0.6	6.1	260	334	104	3.58
34462	1	2	85	5	5		1	2	2					2	2.3	6	222	1406	33.17	231.08	126.25	16.2	45.76	16.181	14.858	11.249	153	4.62	266	333	108	598	248	1582	1846	0.924	1.498	7.981	1.132	254	68	178.7	1.31	94.6	37	651	836	225	7.11
34465	1	2	47	4	2.27	2	1	2	2		1	1	1	2	2.5	2	311	2241	98.85	324.85	159.33	19.8	61.83	20.168	22.087	14.317	275	4.85	71	336	513	2896	34	9285	2689	1.962	1.495	28.974	1.835	465	200	328.3	28.3	147.1	112.9	640	1169	305	29.19
34467	1	2	42	5	5	2	2	2	2		2	1	2	2	0.8	4.2	207	1792	76.51	177.26	79.94	12.9	90.23	32.724	34.582	14.902	519	7.36	584	894	970	3237	18	3468	1472	1.117	2.223	20.544	1.541	389	66	445.6	5.08	100.1	105.9	770	1204	357	13.8
34468	2	2	47	5	2.24	2	2	2	2		2	1	1	1	2.2	6.4	280	2686	71.89	376.33	183.64	8	100.81	50.484	29.661	13.303	560	6.66	866	893	0	319	5	4471	274	1.647	1.671	27.331	1.631	338	200	289.2	3.35	20.7	31.1	775	884	202	18.38
34470	1	1	60	5	5		2	2	2					2	1.3	4.8	257	2026	75.6	258.87	116.01	25	79.26	30.707	26.79	14.952	238	8.97	315	3769	12664	34865	452	1187	2790	1.798	2.068	26.033	1.961	350	135	237.5	1.73	204	122.3	1137	1094	268	13.02
34472	2	1	45	3	5		1	2	2		2	1	1	1	2.4	3.3	452	1069	88.42	96.21	24.72	6.2	37.09	10.396	14.96	6.362	436	4.49	134	170	22	353	148	8766	886	1.283	1.027	18.149	1.249	133	41	330.3	3.58	19.9	13.3	295	952	182	11.04
34474	1	1	34	5	5		1	2	2		2	2	2	2	2	2.9	233	2400	123	324.32	194.55	19.1	66.12	23.326	22.593	14.787	280	7.6	806	1080	273	3154	19	2	3458	1.75	3.784	40.732	2.884	615	297	423.7	8.39	40.5	213.5	1415	2006	494	27.73
34477	1	2	70	5	1.68		2	2	2					2	1.9	5.6	320	989	27.73	168.34	100.7	14	24.6	8.833	9.409	4.201	49	3.68	542	1332	3311	7767	111	2425	1110	1.427	1.722	17.526	1.328	318	198	128.3	4.09	25.3	43.4	739	615	159	12.49
34479	2	2	32	3	2	2	1	2	2					2	1	2.1	226	1155	29.83	206.19	123.07	22.1	28.97	9.523	12.595	4.916	34	6	158	320	282	1716	205	293	711	0.888	1.296	9.172	1.289	254	57	150.1	1.38	158.3	39.1	642	731	216	6.05
34483	1	1	62	5	5		1	2	2					2	2.9	3.5	223	3706	80.38	342.8	99.75	24.3	181.21	34.714	66.441	66.492	344	15.36	526	801	30	3259	73	0	3867	1.869	3.748	22.83	2.224	503	133	523.2	45.73	35	377.6	1209	1994	437	27.69
34490	1	2	33	2	3.4	2	2	2	2		2	1	1	2	1.9	3.3	413	2588	91.64	248.15	113.62	8.8	113.82	37.777	45.393	19.689	933	6.84	488	518	6	349	18	9036	791	1.44	2.176	19.288	1.629	235	100	560.9	4.6	186.2	44.3	792	1407	204	13.37
34496	1	2	31	5	5	2	2	2	2		2	2	2	2	2.4	4.1	198	1227	34.2	231.91	78.53	14.1	20.09	5.124	8.342	4.544	48	4.55	90	505	73	4946	50	1158	8816	1.307	1.147	13.472	1.073	559	241	156	0.79	190.3	383.3	482	666	257	12.46
34499	1	1	45	2	1.7		2	2	2		2	1	1	1	1.9	4.9	216	3633	108.25	456.12	212.2	14.4	155.38	65.088	53.489	23.35	1286	7.78	970	991	0	240	22	1665	977	2.268	6.119	29.795	1.29	522	249	810.4	5.47	9.4	46.9	1365	1899	377	20.7
34500	1	1	48	2	3.31		1	2	2	1	2	1	1	1	4.1	5.5	162	1545	92.84	180.46	92.81	16	54.54	22.984	19.841	8.626	184	7.31	335	388	19	606	27	365	681	1.018	2.178	26.757	1.506	330	123	309.7	3.83	106.3	49	1355	1551	347	12.01
34501	2	2	44	5	3.32	2	2	2	2		2	1	2	2	1.8	2.2	233	1879	73	214.39	94.68	14.2	82.78	28.137	33.13	14.97	132	12.8	672	695	0	257	0	13893	111	2.112	3.294	24.195	1.719	610	504	189.8	7.09	25.7	27.3	1576	1434	284	20.3
34504	2	2	58	3	5	2	1	2	2					2	2.3	3.3	296	2269	59.97	343.36	225.14	10.8	78.56	23.292	28.72	19.493	338	5.57	226	261	63	380	20	1029	548	1.27	1.226	17.863	1.393	244	105	272.8	3.81	114	52.7	463	797	166	13.71
34507	1	1	61	1	2.8		1	2	2					1	1.8	5	239	1731	75.1	218.8	73.91	18.1	61.22	21.906	24.108	9.693	495	4.46	313	318	2	47	27	0	356	1.702	2.444	11.86	0.818	444	184	393.6	4.01	25	21.4	928	1261	242	13.9
34509	2	2	39	4	5	2	1	2	2		2	1	2	2	1.1	2.8	251	2216	51.3	255.94	109.85	16.7	116.98	32.431	37.933	34.052	146	14.22	199	490	989	2891	158	13091	482	0.562	1.315	14.507	1.563	221	17	181.2	1.19	107.6	108.2	575	799	310	7.37
34514	1	1	63	5	1.17		2	2	2					1	2.5	3.4	201	1531	43.43	227.83	149.75	8.2	53.46	9.803	20.68	18.832	78	4.38	183	202	11	182	77	0	625	0.682	3.042	13.143	0.655	121	11	189.2	0.45	3.2	34.9	276	573	236	5.16
34515		2	36	4	1.24	2	1	2	2		2	2	1	1	3.6	3	261	2169	90.79	263.37	127.86	9.9	64.86	19.677	23.912	15.011	586	4.36	291	305	0	156	10	3798	446	1.255	2.475	31.46	1.651	328	152	486.4	2.04	0.7	21.2	521	1024	235	11.29
34518	1	1	48	5	4.1		1	2	2		2	1	2	1	1.8	2.4	178	4034	99.06	483.01	170.17	58.5	147.32	37.47	50.025	46.773	486	18.5	345	571	123	2636	72	20454	3023	2.189	3.182	33.441	2.659	515	114	617	3.6	110.4	432.7	992	1979	564	27.09
34520	2	2	34	4	3.75	2	1	2	2		2	2	2	2	3.1	3.4	391	1950	52.38	297.51	69.03	26	71.8	14.444	19.494	32.983	43	4.02	26	27	0	16	0	0	106	1.612	0.924	8.04	1.246	497	356	101.2	1.37	5	72.4	666	1940	783	23.26
34523	2	1	43	4	2.38		2	2	2		2	2	1	1	2.1	2.8	195	1882	49.24	242.44	136.82	7.4	81.34	19.627	31.229	23.488	144	5.18	496	577	39	356	1152	0	1202	1.562	1.38	19.874	1.812	389	153	189.8	1.53	268.4	47.7	903	608	182	17.85
34528	2	1	85	1	2.5		1	2	2					2	1.9	7.3	273	2038	79.57	235.66	133.3	18.1	90.45	29.593	28.796	23.425	420	8.78	658	817	57	1755	355	2395	2314	2.29	2.503	16.075	1.687	383	43	418.4	4.48	250.2	233.3	1298	1536	312	9.56
34530	1	1	41	5	3.66		2	2	2		2	2	2	2	1.2	4.6	187	2106	93.37	322.63	154.06	38.5	53.46	17.735	23.966	5.312	188	7.71	0	119	68	1278	161	32188	620	1.756	2.24	24.945	1.624	338	176	363.7	5.74	60.5	57.5	628	1129	298	22.31
34531	1	1	81	1	1.21		1	2	2					1	2	8.2	174	1388	86.95	145.75	28.21	14.1	49.15	15.16	20.032	8.637	181	2.02	62	253	129	2204	62	3708	2470	1.922	2.599	27.958	1.545	314	104	287.4	2.45	94.1	42.1	483	1022	246	10.49
34534	2	1	52	5	2.65		1	2	2					2	1.5	2.4	268	1603	66.55	217.33	98.96	21.1	57.75	18.938	19.605	11.422	587	9.46	404	670	15	3018	309	20275	5341	1.468	2.236	16.697	1.217	375	131	436	14.54	118.5	192.1	945	1376	283	20.2
34535	1	1	77	5	2.5		1	2	2					1	1.6	2.1	185	2036	77.04	144.87	24.25	6.7	85.09	32.526	31.176	15.98	412	5.91	663	1240	2409	5703	9	0	683	1.168	1.647	29.339	1.796	237	39	424.1	1.97	12.6	57.5	623	1112	246	7.91
34538	1	1	76	3	3.03		2	2	2					2	1.7	1.8	142	2395	70.62	361.4	227.45	21.3	81.31	24.417	27.943	21.546	250	9.44	223	713	630	5503	85	2	5531	1.344	1.709	27.09	2.085	316	121	272.7	3.43	47.3	288.4	555	1124	295	15.36
34540	2	2	46	4	3.5	2	1	2	2		2	1	2	1	1.6	3.9	318	433	13.83	42.94	27.72	1.5	23.08	12.449	5.74	3.122	32	0.81	37	39	0	44	2	0	68	0.386	1.046	4.433	0.214	56	22	57.5	0.58	2.4	7.8	224	304	58	2.15
34542	2	2	31	3	1.25	1	1	2	2		2	1	2	2	1.6	4.8	247	2116	101.05	315.82	157.71	19.2	53.01	13.557	19.414	15.026	627	6.92	551	614	84	286	860	553	1056	1.404	2.14	15.775	2.636	344	101	538.8	13.09	228.7	28.5	1713	2212	480	11.13
34543	1	1	67	3	2.39		2	2	2					1	1.7	4.7	263	2240	100.22	185.06	52.43	22.7	92.26	27.151	39.495	18.676	164	8.82	101	151	28	485	174	4177	1145	1.519	1.997	25.421	1.515	302	15	346	2.69	120.8	36.4	1001	1589	396	11.06
34546	1	2	23	5	3.12	2	2	2	2		2	2	2	2	2.2	3	421	2765	79.72	448.26	240.2	11.7	79.68	35.34	25.033	12.041	221	5.01	1901	2068	113	690	781	3136	2618	6.312	7.03	78.697	8.687	1203	965	271.2	25.46	245.3	32.3	1499	1584	249	67.07
34548	1	1	22	2	5		2	2	2		2	2	2	1	2.4	3.3	199	4453	158	616.09	272.64	9.7	125.1	34.286	56.745	24.358	1165	8.17	598	624	0	302	22	5778	724	2.237	2.496	55.439	3.554	736	497	850.5	3.94	24	79.7	952	1911	390	23.76
34551	1	2	73	4	0.94		2	2	2					2	1.4	4.5	170	893	19.14	147.85	77.38	8.5	28.13	10.239	8.683	6.46	129	2.71	124	147	26	207	118	0	379	0.556	0.591	5.068	0.791	192	61	109.5	0.55	159.8	20.5	244	349	135	5.5
34557	1	1	62	2	3.11		1	2	2					1	1.8	4.2	285	2042	75.59	224.77	58.01	29.7	98.44	27.425	36.011	28.617	269	19.48	181	250	41	776	58	13339	940	1.882	2.6	20.685	1.821	572	178	319.2	0.91	165.4	75.9	929	1475	385	18
34561	1	2	71	3	2.45		2	2	2					1	1	2.5	228	1787	43.86	207.09	67.35	27	41.78	12.803	10.311	15.078	56	8.99	185	446	117	3050	46	12370	2850	1.044	1.354	18.748	1.572	255	13	160	0.65	27.9	229.9	568	928	309	12.3
34562	1	1	39	4	1.36		2	2	2		2	2	1	2	2.5	3.8	254	4445	153.28	549.25	303.17	14.2	183.83	77.691	56.181	32.643	916	12.97	1303	1345	17	510	51	511	610	2.35	4.13	27.707	2.772	521	338	601.3	10.75	6.9	78.9	2070	2484	355	20.06
34563	1	2	26	5	0.88	2	2	2	2		2	2	1	2	2.2	3.1	336	1773	72.53	229.41	119.84	14.4	63.99	21.651	24.933	11.629	181	3.05	538	595	31	602	69	2920	579	1.313	1.319	25.454	1.775	335	206	177.5	1.73	31.9	23.2	557	918	255	15.91
34564	1	2	38	4	2.02	2	2	2	2		2	2	2	1	2	3.1	328	2290	90.75	189.25	13.88	12.3	121.79	28.355	46.588	37.26	753	9.58	381	523	0	1719	13	0	2284	1.565	2.201	22.88	2.184	386	162	588.4	4.64	41.9	181.1	360	1341	221	15.4
34566	1	1	39	4			2	2	2		2	1	2	1	2.1	3.4	210	2000	87.69	169.3	28.21	15.3	110.25	34.433	32.944	31.795	252	14.55	684	720	107	358	0	2414	1384	1.609	2.143	28.957	2.401	443	284	256.7	10.14	6.2	16.6	827	1229	290	24.18
34569	1	1	69	5			2	2	2					2	1.4	2.3	233	2885	90.95	271.34	118.85	13.8	130.66	35.517	49.991	36.968	369	10.87	813	1127	747	3391	55	0	2161	1.626	3.179	18.579	1.497	457	161	416.5	6.23	155	289.5	1078	1612	272	13.48
34571	1	2	29	5	5	1	1	2	2		2	1	2	2	2	13.7	276	2613	75.71	354.1	177.24	15.9	104.82	41.22	35.399	21.18	172	6.34	844	898	51	473	277	7737	972	2.221	2.688	21.596	1.929	480	280	277.6	3.96	71.7	59.9	1252	1459	279	18.11
34572	1	1	82	1	1.84		2	2	2					1	1.9	5.2	185	2734	131.94	334.18	114.79	24.5	98.22	28.719	42.882	19.05	331	12.49	1014	2213	4710	11912	156	37856	655	3.608	4.406	67.847	4.098	912	699	426.6	10.45	159.9	58.3	1266	2189	431	38.54
34573	1	1	66	5	4.59		2	2	2					1	1.6	2.7	285	2317	83.05	346.79	246.15	15.3	72.27	37.267	23.661	5.514	269	2.58	771	825	59	381	431	0	669	1.36	2.859	11.54	1.509	284	70	302.1	5.62	130	33.1	2314	2084	345	10.49
34574	2	2	57	4	1.22	2	2	2	2					1	2.4	6.5	273	1591	35.22	176.07	102.53	8.8	83.53	36.624	31.471	8.76	105	1.89	219	223	0	50	1	0	56	0.708	1.137	8.136	0.308	172	91	110.6	3.09	29.4	19.6	528	691	146	7.56
34575	1	1	69	5	2.57		1	2	2					2	1.6	4.5	182	1531	90.22	176.29	65.68	12.6	40.43	17.791	11.437	6.996	189	3.44	578	621	3	493	55	0	656	1.211	2.207	25.132	1.625	291	124	282	5.57	94.7	84.8	1253	1491	263	10.62
34577	1	1	38	3	1.56		2	2	2		2	1	2	1	2.5	2.3	340	2231	114.69	183.7	35.98	18.1	116.17	32.273	38.903	35.313	309	12.48	250	385	98	1597	4	3728	2436	2.016	1.966	35.717	2.634	317	41	456.1	10.44	60.4	100.9	1449	1965	339	12.2
34578	2	1	55	3	3.3		1	2	2					2	2.3	1.4	150	1663	75	276.61	137.15	12.5	28.22	6.506	8.421	10.148	131	5.56	11	92	85	657	512	8214	622	1.322	1.065	34.926	1.599	333	154	206.1	0.71	125.5	42.2	425	801	227	12.54
34581	1	1	53	3	1		2	2	2					2	2.9	3	260	1582	83.18	139.11	35.14	13.9	59.03	21.327	24.611	9.046	211	3.81	159	213	21	597	52	2506	1113	0.745	1.084	28.893	1.894	237	25	298.6	2.01	35.9	85	588	1229	216	7.61
34582	2	1	61	2	2.18		2	2	2	1				1	2.5	2	139	1053	38.48	92.18	23.52	5.4	59.12	14.594	22.066	16.911	597	4.19	268	273	0	54	12	0	761	0.628	1.115	10.422	0.746	152	10	351.3	2.3	8.1	27.9	245	558	105	6.6
34584	2	2	68	3	1.63		1	2	2					2	2.1	3.1	256	2078	75.76	332.18	131.9	30	61.19	16.681	22.914	17.455	132	6.36	647	768	30	1436	1	0	1414	2.123	2.821	32.429	5.993	820	551	320.5	9.64	107.9	212.1	876	1608	403	19.21
34586	1	1	65	3	2.86		2	2	2					1	2.6	3.8	251	3163	165.72	328.88	240.49	18.2	140.01	48.163	55.995	25.054	751	14.37	449	459	42	123	70	0	508	3.957	4.684	41.709	3.783	414	89	765.3	7.16	36.6	10.3	1724	2424	554	12.84
34590	2	2	62	3	0.82		2	2	2					2	2.6	7.2	361	1240	49.6	144.72	73.71	9.4	53	15.39	23.463	7.654	282	4.37	102	141	14	365	158	8942	397	0.786	0.909	14.08	0.849	198	89	231.6	3.06	116.6	32.8	271	620	125	9.13
34591	2	2	31	5	3.1	2	1	2	2		2	1	1	2	2.4	2.8	303	752	5.88	161.77	130.73	7.1	12.55	6.744	2.892	2.388	1	1.73	2	49	13	494	118	289	396	0.329	0.232	2.705	0.463	85	13	27.6	0.05	29.5	24.5	172	120	80	2.61
34595	2	1	39	4	5		2	2	2		2	1	2	2	1.8	3.9	320	1680	41.88	277.65	117.22	6	45.24	16.039	17.415	7.94	75	2.22	483	486	3	33	0	0	48	1.486	1.523	18.599	1.355	434	378	123.4	4.37	0.5	11	733	770	178	20.4
34597	1	1	41	5	4.01		2	2	2		2	2	2	2	1.6	6.9	270	2168	73.43	327.15	177.87	9.2	64.5	24.676	22.333	9.181	163	3.99	501	552	53	401	369	1029	525	1.773	2.591	23.166	1.539	473	315	257.2	6.09	101.4	32.1	1339	1403	272	16.95
34599	1	2	28	2	0.85	2	2	2	2		2	1	1	1	3	5.3	435	1066	35	140.98	73.95	13.1	44.19	14.669	14.92	9.851	62	4.35	363	379	4	197	14	1029	218	1.202	1.59	14.466	1.383	231	156	134.6	4.61	24.3	35	544	736	199	12.15
34605	1	1	53	5	5		2	2	2					2	2.7	6.5	242	3065	104.1	319.11	83.32	26.6	157.11	53.073	55.392	34.876	349	10.97	498	697	641	2021	38	1158	747	1.508	2.285	27.283	2.25	410	138	312	3.59	93	99.5	1370	1921	431	18.3
34606	1	2	31	2		2	1	2	2		2	1	1	2	1.5	4.8	214	3095	128.21	320.6	213.71	16.9	149.18	39.198	58.891	38.459	474	15.67	523	688	625	1657	13	1582	275	1.178	2.428	28.584	2.282	254	73	355.6	3.94	84.2	140	1101	1743	377	10.68
34607	2	2	63	3	1.32		1	2	2					2	2.4	4.6	375	1004	33.53	128.04	37.36	13.3	42.45	10.415	17.107	10.902	208	3.17	98	153	189	548	21	0	366	0.677	0.786	6.891	0.497	147	81	175.6	1.98	17.3	22.9	359	627	127	7.26
34608	1	2	45	4	5	2	2	2	2		2	1	2	1	2.6	2.6	269	3277	84.34	338.25	101.94	32.4	183.7	59.081	70.196	40.621	767	14.53	723	798	142	805	50	4246	1555	2.415	3.499	35.169	3.066	790	399	552.6	5.38	69.4	59.7	949	1804	494	31.85
34609	1	1	29	4	4.05		1	2	2		2	2	2	2	2.3	4.6	320	2544	129.78	223.46	27.59	16.9	127.76	41.413	53.391	20.877	328	7.66	185	251	74	760	5	4683	511	1.712	1.661	33.245	2.51	394	138	475.3	6.88	39.8	94.5	520	1430	319	18.8
34612	1	1	35	1	1.65		1	2	2		2	1	2	1	3.3	6.1	352	1916	92.97	238.09	62.52	25	68.07	21.291	29.563	11.317	190	4.45	117	228	325	1155	23	1544	1512	1.498	1.319	29.12	1.605	326	160	259.4	2.67	38.9	61.7	952	1417	322	15.18
34613	2	1	69	3	0.61		1	2	2					1	3	3.2	224	1422	79.86	159.22	99.89	5.5	52.05	15.11	20.364	11.546	220	4.2	148	354	0	2480	1	1	4196	0.739	1.263	18.769	1.066	221	49	171.4	2.48	14.6	208.5	493	853	166	9.78
34614	1	2	23	4	1.46	1	2	2	2		2	1	2	2	1.4	6.9	219	2339	63.55	353.48	195.26	12.8	77.3	26.453	26.386	19.452	131	8.66	775	1057	261	3211	111	8459	3136	1.664	2.843	14.123	1.707	404	142	230.6	6.43	178.5	234.7	1612	1611	241	12.33
34618	1	2	39	4	0.62	2	2	2	2	1	2	1	2	1	2.3	4.6	346	1559	43.82	184.85	107.66	5.1	54.48	18.1	23.692	8.27	110	4.1	190	213	0	286	2	3008	196	0.673	0.714	9.987	0.759	126	60	144.7	3.29	19.2	26.5	229	543	79	9.16
34620	1	2	67	3	1.01		1	2	2					2	4.4	3.2	212	2935	72.16	359.44	176.38	18.6	144.92	38.532	50.55	41.232	493	10.09	477	585	84	945	655	1404	1453	1.891	2.062	24.324	1.727	443	186	397.1	2.28	164.2	176	1221	1212	329	34.47
34623	1	2	32	4	4.55	2	2	2	2		2	2	1	2	1.3	2.1	295	1407	24.76	242.06	151.41	1.1	38.49	20.846	11.303	3.311	222	2.54	551	567	7	105	188	0	333	1	1.566	9.524	0.993	221	154	176.5	3.84	125.5	13.6	462	740	100	5.81
34625	2	2	74	5	5		1	2	2					1	1.5	4.9	464	501	19.65	72.54	35.77	7.9	16.26	5.038	5.941	3.854	40	2.11	74	111	28	415	44	6089	156	0.32	0.584	5.501	0.535	88	22	81.8	0.15	19.2	22.8	197	238	108	4.19
34627	1	1	56	3	0.51		2	2	2					1	1.5	3	257	2040	52.05	226.71	75.89	8.7	63.37	24.028	22.542	12.009	148	3.3	186	214	14	321	3	7359	223	1.634	2.933	20.282	0.797	326	170	222.9	1.37	30.3	31.7	617	861	210	12.17
34631	1	2	36	5	5	2	2	2	2		2	2	2	1	2.7	5.9	246	3110	96.56	358.26	81.8	27.6	124.66	28.496	51.1	33.296	156	17.15	296	562	352	3012	8	7100	915	2.028	2.475	38.769	2.207	665	325	311.5	1.56	61.4	175.4	574	1466	475	21.63
34633	1	1	70	3	3.97		2	2	2					2	1.5	3.1	225	2888	85.57	412.99	212.34	15.9	104.78	32.454	42.775	21.874	549	7.53	501	717	616	2238	68	3291	652	1.574	2.431	22.967	1.312	404	212	409.1	4.41	37.3	70.6	713	1227	265	18.63
34637	1	1	48	2	0.9		2	2	2		2	1	2	2	2.4	4.8	375	4741	195.22	475.68	235.74	21.1	234.89	76.631	70.382	61.168	939	78.37	1480	1850	233	4187	249	4418	5173	4.789	4.313	75.858	6.29	911	407	817.8	17.36	448.2	375.7	1737	2520	561	21.04
34640	1	1	24	3	0.94		1	2	2		2	1	2	1	2.1	4	244	2261	117.15	182.14	70.04	17.6	119.04	43.308	47.908	15.971	899	5.77	354	404	35	553	82	12499	768	1.937	2.43	27.088	1.62	312	93	626	6.74	22.8	33.4	1123	1613	284	18.04
34642	1	1	54	4	2.51		2	2	2					2	1.6	3.2	252	3296	116.08	340.21	120.5	42.3	176.64	46.131	73.874	44.243	102	21.67	199	245	68	526	6	15813	528	1.783	2.071	38.029	2.533	481	110	277.5	1.91	66.4	44.9	1108	2126	680	18.78
34644	1	2	38	2	0.93	2	1	2	2		2	1	2	2	2.4	6.8	347	1344	65.47	117.61	20.45	11.2	67.8	22.399	28.965	12.276	187	1.62	48	69	6	231	27	2	329	0.724	0.846	16.314	1.097	125	51	201.3	6.09	9.9	53.4	494	804	190	8.75
34647	1	2	70	2	3.31		2	2	2					1	1.5	5.3	318	1069	46.9	148.03	85.52	17.1	34.41	12.184	13.348	4.891	270	2.42	269	284	4	162	58	0	373	0.694	1.704	10.559	0.79	161	36	256.9	2.93	20.4	24.8	628	790	191	6.27
34649	1	1	64	3	1.2		1	2	2					1	2.7	4	274	4671	218.91	323.85	108.29	13.5	219.4	53.422	75.469	73.655	907	24.02	522	598	68	871	8	12893	974	3.959	4.198	55.363	3.807	549	194	1174.4	60.54	61.2	194.9	1535	3448	577	34.04
34650	1	2	21	5	5	2	1	2	2		2	2	2	2	2	4	309	1107	46.47	92.19	24.97	7	61.9	21.035	20.223	15.787	271	4.91	249	358	400	1107	5	3189	972	0.564	1.036	10.391	0.593	133	24	177.9	1.54	15	36.7	594	888	130	6.83
34653	2	2	34	2	1.65	2	1	2	2		2	1	2	2	2.2	3.9	254	4531	202.63	418.2	209.24	30.9	230.49	81.309	89.915	38.261	1593	14.34	1029	1112	37	912	93	20901	1091	1.619	3.613	36.61	2.888	446	137	982.4	8.07	56.1	74.9	1832	2848	490	22.25
34656	1	1	65	5	4.35		1	2	2					1	2.1	4.5	401	1880	75.25	287.22	132.6	38.6	60.01	10.091	31.025	14.514	4	10.64	30	132	359	970	158	1751	672	6.114	4.859	32.625	3.628	483	63	266.1	1.6	118.2	55.3	1423	1347	605	35.67
34661	2	1	45	2	1.32		1	2	2	1	2	2	1	1	2.8	2.8	247	2576	92.49	332.48	172.36	7.2	98.88	39.417	35.591	12.978	214	2.78	817	853	30	117	2	26	709	3.276	3.968	40.514	3.481	602	491	277.8	13.4	25.2	20.2	1175	1314	199	32.19
34662	1	2	44	2	1.57	2	1	2	2		2	1	1	1	2.6	4.9	363	1976	51.53	342.85	164.28	19.4	46.06	14.303	21.633	6.41	77	2.4	47	79	39	394	3	7295	175	1.84	1.026	15.127	1.81	466	154	166.7	1.83	374.8	34.5	588	825	293	14.94
34663	1	2	69	2	0.44		1	2	2					2	2.6	3.5	251	1557	33.09	258.23	149.54	5.6	45.21	19.716	15.606	7.238	69	3.13	280	290	1	115	0	0	32	0.872	1.041	7.124	0.195	168	132	118.9	1	0.4	19.2	516	562	104	6.42
34667	2	2	23	3	1.2	2	2	2	2		2	1	2	1	1.7	4.2	390	1393	37.29	165.93	70.46	7.7	65.56	21.094	23.595	16.356	84	3.14	314	333	28	157	3	516	248	1.194	1.539	16.833	1.526	260	179	132.8	4.73	17.7	26.8	660	727	129	11.85
34669	1	1	40	3	3.27		2	2	2		2	1	2	1	1.8	4.5	263	3955	135.56	372.91	108.36	20	151.32	51.311	67.559	25.061	369	6.6	210	930	3049	6998	167	318	839	2.306	2.482	42.033	3.508	406	138	673.1	12.49	27.3	101.8	748	2000	434	31.5
34671	2	2	20	4	3.12	2	2	2	2		2	2	2	2	2	2.8	320	1798	65.29	239.84	112.78	9.9	65.23	19.625	32.25	7.718	177	3.15	328	342	0	169	1	3342	191	1.043	1.172	22.737	2.163	162	76	225.7	6.82	9.3	32.5	485	977	147	14.46
34673	1	2	58	2	0.94	2	1	2	2					1	1.5	5.8	308	1311	39.21	171.77	112.03	9.8	53.25	13.88	21.286	14.153	283	7.4	934	1674	13	8881	4	5	16279	0.512	1.244	9.509	0.859	398	46	164.9	4.41	59.1	750.8	684	647	122	9.16
34674	2	2	80	2	1.48		2	2	2					2	2.1	5.1	259	867	38.37	126.29	62.85	6.4	23.75	8.332	7.263	5.733	137	3.01	112	366	882	2432	333	0	460	0.57	0.983	15.412	0.676	165	59	115.2	0.42	68.8	19	335	443	124	5.54
34675	2	2	78	3	0.63		1	2	2					2	1.6	5.2	258	1464	46.97	240.66	125.25	18.8	38.22	11.73	13.699	9.224	74	6.26	544	1805	4373	12726	418	1	1748	1.42	1.449	20.542	2.235	298	118	190.3	1.23	228.4	99.3	797	871	253	13.35
34681	1	2	39	4	4.13	2	2	2	2		2	1	2	2	1.3	2.3	314	1722	70.64	163.19	48.55	16.6	73.91	23.994	26.078	17.456	193	9.07	157	268	80	1273	37	13634	900	1.274	1.91	23.574	1.423	341	134	229	3.93	35	171.8	685	1031	262	12.36
34687	2	2	34	4	1.34	2	2	2	2		2	2	1	2	1.8	4.5	250	2448	74.49	388.67	266.77	11.2	68.78	19.938	24.374	18.063	775	5.46	583	654	41	824	14	1029	2737	1.235	2.279	15.631	1.29	350	152	528.7	4.06	261	69.7	1093	1348	209	13.26
34696	1	1	25	5	5		2	2	2		2	2	2	2	3.6	2.6	214	8241	402.29	492.87	223.45	24.1	389.27	97.204	174.166	76.019	2154	16.34	1005	1040	10	351	73	5	1485	4.115	5.652	98.96	7.619	548	137	1979.7	28.6	229.3	249.4	1912	6191	1630	52.59
34697	2	2	46	2	2.71	2	2	2	2		2	1	1	1	1.4	3.4	337	846	19.15	153.59	103.88	3.9	19.48	6.072	5.774	5.926	52	1.87	52	70	28	182	0	129	285	0.476	0.371	4.709	0.27	111	72	46.7	0.71	7.7	16.8	234	345	49	4.74
34700	1	1	52	4	5		2	2	2					2	1.8	3.8	211	2010	70.14	290.34	171.28	17.4	69.28	25.994	17.556	20.692	158	5.58	278	304	0	332	12	0	225	1.422	1.758	12.466	1.016	133	45	193	3.16	64.7	33.4	987	1162	190	8.77
34703	1	1	61	5	1.52		2	2	2					2	1.7	4.4	214	2646	117.18	307.69	134.86	18.3	109.92	36.386	38.329	28.425	179	7.64	1025	1055	52	353	50	783	435	2.233	3.956	41.511	3.026	642	406	345.3	11.7	8.3	56.7	1997	2236	445	34.54
34705		2	22	4	0.62	2	2	2	2		2	1	2	2	1.5	3	253	2041	94.82	235.5	52.54	12.2	78.88	33.964	25.288	8.806	470	3.82	457	501	263	338	51	0	1171	1.799	1.753	19.314	1.026	490	361	334.1	5.75	46	84.4	651	1236	193	14.4
34707	1	2	69	4	3.12		1	2	2					2	2.7	1.9	205	1291	42.13	170.99	71.73	11.8	50.89	14.114	19.151	14.094	95	5.22	111	138	7	322	32	531	160	0.637	0.635	11.564	0.635	153	90	128.7	1.71	30.3	29.5	330	615	157	6.1
34710	1	2	50	5	5	2	2	2	2					1	2	2.1	274	2332	70.87	373.48	161.68	21.4	64.74	28.43	22.702	9.505	140	13.87	248	354	93	1012	464	4641	494	12.675	4.899	60.361	3.514	1250	1073	203.8	8.79	234.5	23.5	1494	1808	511	36.82
34711	2	2	76	1	2.36		1	2	2					2	1.9	3.8	280	1682	40.57	270.48	59.74	28	51.33	13.021	19.469	15.536	82	4.48	1112	1299	1059	1698	30	0	177	1.774	1.431	17.933	2.221	429	236	180.1	1.1	40.2	45.7	553	892	277	18.06
34712	1	2	20	2	2.94	1	1	2	2		2	1	2	2	3.8	6	277	1623	65.31	156.08	74.12	7.5	83.33	27.317	31.254	18.041	243	4.33	229	268	74	418	2	1857	227	1.227	1.23	23.586	1.412	158	82	221.7	2.06	12.8	35.8	423	949	127	6.98
34713	2	1	72	5	3.9		1	2	2					2	0.4	3.2	236	1404	59.89	182.45	53.1	12.4	48.4	16.405	20.798	6.815	118	2.78	594	617	21	265	3	3523	184	1.45	2.308	20.043	1.737	500	330	209.6	6.17	16.5	26.2	987	1244	289	14.94
34715	2	2	76	3	1.88		1	2	2					1	1.8	5	282	1795	47.35	254.06	103.31	15.4	69.87	29.435	21.401	13.759	334	4.89	466	503	40	349	79	0	423	1.164	1.737	17.94	1.378	276	114	273.7	2.81	136.7	64.3	741	949	222	9.55
34716	1	1	62	4	4.9		1	2	2					1	2.6	4.5	322	1954	58.55	222.64	96.9	16.3	97.36	31.993	33.371	24.862	155	10.88	456	692	368	2428	401	3574	1927	1.047	2.193	21.69	1.759	324	42	205.7	3.68	110.2	139.5	927	1079	281	9.67
34717	1	1	42	5	3.75		2	2	2		2	1	2	1	1.5	5.5	245	6365	146.53	693.12	214.96	37.5	113.09	35.347	40.573	25.99	216	12.61	1008	1112	80	1018	405	21369	1234	4.146	6.506	82.29	8.155	1871	1053	1136.1	13.7	221	109.4	2165	3016	1011	44.11
34718	2	2	55	5	2.65	2	1	2	2					2	3.1	5.2	372	1343	56.28	174.52	59.32	10.1	47.5	16.898	14.181	12.991	109	4.07	235	305	53	773	49	783	731	1.106	1.174	17.794	0.987	324	185	146.3	3.52	82.1	108.5	860	757	195	8.41
34719	2	2	24	2	5	1	2	2	2		2	2	2	1	1.8	5.4	274	1227	52.38	161.7	97.98	5.8	43.5	14.062	15.183	10.721	112	1.94	292	331	36	430	23	515	519	0.874	1.466	13.962	0.98	197	112	159	2.86	90	26	972	957	201	6.95
34722	1	2	25	3	3.92	1	2	2	2		2	2	2	1	1.7	7.6	370	2758	115.41	284.52	84.2	17.2	130.23	38.566	49.104	33.262	421	8.59	581	669	38	945	215	9	1628	2.94	3.467	37.015	2.888	1199	829	440.4	4.42	129.7	141.6	1547	1749	349	22.87
34723	2	2	21	3	2.18	1	1	2	2		2	2	2	2	1.5	4.9	195	1772	62.94	245.84	65.3	21.6	62.3	13.085	20.176	23.317	112	5.69	68	106	12	389	113	17810	332	0.916	1.183	15.881	1.322	287	117	156.7	0.71	58.4	34.4	566	988	285	9.61
34724	1	2	39	4	4.96	2	1	2	2		2	2	1	1	2.5	3.2	227	1028	43.84	99.34	57.37	7	51.75	18.501	15.322	12.118	103	6.63	257	362	135	1164	14	8756	615	0.628	1.24	8.454	0.661	152	39	162.7	3.72	31.4	91.9	761	710	138	5.43
34726	1	2	67	3	1		2	2	2					1	2.6	2.3	198	2150	68.35	344.82	190.83	12.7	60.29	23.235	19.554	11.931	203	5.63	598	686	86	525	959	0	1476	2.171	2.404	33.39	3.31	531	306	227.8	7.26	203.5	43.7	820	1037	280	22.24
34728		1	44	5	4.42		1	2	2		2	1	2	2	2.6	2.1	225	1503	50.79	212.46	111	12.8	41.05	7.951	13.897	15.709	97	10.3	7	114	24	1284	1	59402	31	0.997	1.307	15.312	0.938	313	185	136.9	0.42	36.8	55.1	205	573	203	11.43
34731	1	2	49	5	3.76	2	1	2	2		2	1	2	2	2.6	5.1	320	1318	74.17	194.55	97.12	25.5	32.06	11.878	9.336	7.93	136	6.88	457	1414	3696	9631	39	4256	1725	1.078	2.94	25.568	3.051	242	0	298.1	4.64	97.6	86.8	948	1280	337	7.79
34733	2	2	27	3	3.87	2	2	2	2		2	2	1	2	1.4	2	452	1805	29.08	313.65	210.02	8.6	52.08	20.543	21.371	8.022	123	2.82	320	343	6	259	9	0	117	0.971	0.819	10.041	1.386	183	96	118.8	3.22	54.4	167.3	493	592	120	10.73
34734	2	2	55	1		2	1	2	2					2	1.6	4.4	347	2122	93.72	359.64	206.58	16.1	27.23	5.803	9.914	8.698	206	1.92	85	97	5	138	33	0	301	0.791	1.193	35.014	1.916	211	77	271.2	1.03	7.6	17	373	1115	278	9.8
34735	1	2	26	5	2.8	2	2	2	2		2	1	2	1	2.7	5.3	365	976	57.44	98.16	61.7	15.5	43.13	16.47	17.662	5.052	214	7.65	173	537	106	4294	75	434	6127	0.537	1.454	9.569	0.949	239	13	198	3.69	67.1	300	1056	970	242	5.87
34737	1	2	21	4	5	2	2	2	2		2	1	2	1	1.9	4.3	335	1306	37.81	242.71	123.28	9.8	22.98	8.681	7.183	5.227	108	2.42	93	101	2	95	7	1640	142	1.28	1.238	12.962	0.877	321	207	113.9	2.45	42.3	11.7	466	647	171	7.71
34739	2	2	21	2	3.61	1	2	2	2		2	2	1	2	2.2	7.1	397	3636	144.06	532.62	362.46	17.7	110.91	39.216	41.17	17.422	800	17.83	414	603	24	2287	36	3947	1473	2.111	2.962	38.966	3.351	426	217	648.5	8.63	231.2	107.8	977	1913	380	26.25
34740	2	2	42	3	3.5	2	1	2	2		2	1	2	2	2.1	4.2	277	1270	52.64	126.28	62.02	12.8	61.46	19.106	15.646	22.503	155	6.26	331	393	14	745	7	0	2012	0.695	3.145	17.929	1.394	191	31	216.4	1.44	84.7	163.1	498	894	191	9.14
34742	2	1	40	3	2.56		2	2	2		2	2	1	2	2.1	6.8	302	1613	79.5	199.86	80.34	11.4	54.21	19.887	20.066	9.71	205	3.56	146	173	27	306	11	3944	120	0.945	0.868	17.614	1.243	317	166	191.7	1.93	73.1	25.8	537	871	182	10.73
34743	1	2	53	5	5	2	2	2	2					1	2.4	3.7	310	1407	71.39	137.17	39.64	30.9	48.16	11.131	16.847	16.497	149	4.81	186	528	557	3796	48	2812	4195	1.164	2.147	23.698	1.878	354	94	301.6	4.96	41.2	200.5	852	1239	444	16.52
34745	1	2	61	3	3.63		1	2	2					1	2.4	5.5	292	2002	70.14	154.94	67.9	6.3	70.29	28.853	24.427	12.115	190	3.23	145	157	7	134	3	133	146	1.578	1.824	18.424	1.39	188	63	233	5.22	7.2	32	720	1171	246	15.25
34747	2	2	30	3	2.21	2	2	2	2		2	1	2	1	2.8	3.5	352	2247	88.11	282.65	149.99	10.1	87.37	31.923	32.221	15.984	259	5.18	1026	1091	23	678	208	0	1136	2.837	3.762	35.232	2.77	554	397	292.7	6.48	98.1	100.5	1236	1315	239	22.43
34754	1	1	42	4	2.96		2	2	2		2	1	1	1	3.2	5.3	310	1995	72.97	190.94	23.93	7.2	74.86	28.725	27.006	13.073	180	2.94	464	480	0	189	0	0	28	1.203	1.742	18.482	0.992	338	205	233.7	1.81	0.1	28.7	1083	1133	236	9.62
34756	1	1	66	1	0.84		1	2	2					2	1.1	2.1	205	1721	91.99	218.84	109.65	18	53.31	15.779	20.643	11.131	240	1.96	91	122	17	356	12	622	916	1.003	0.94	22.371	1.646	377	42	254.6	1.9	83	82.9	310	962	255	10.9
34759	1	1	49	3	0.56		1	2	2		2	1	2	2	2.6	3.5	247	1223	40.67	180.5	35.21	12.1	9.05	1.98	2.992	3.048	55	1.59	7	205	508	2121	1	2110	1826	0.938	0.961	18.464	1.505	263	117	217.3	0.49	37.8	89.9	226	788	220	7.35
34761	1	2	52	1	1.71	2	1	2	2					1	2.4	3.9	325	417	13.46	87.99	48.4	12.8	3.79	0.658	0.915	1.436	2	2.02	75	155	99	766	266	3993	679	0.555	0.546	4.091	0.574	168	25	69.9	0.65	136.6	42	405	310	110	3.63
34762	1	1	62	5	5		1	2	2					1	2.4	8.5	271	2887	114.48	269.48	94.03	13.2	152.84	71.565	48.53	20.852	283	9.35	474	519	8	510	4	16018	322	2.389	6.178	27.139	1.212	424	165	297.1	5.81	53.7	52.8	2303	2058	439	15.12
34768	1	1	38	4	3.01		2	2	2		2	2	2	1	2.8	3.4	232	2052	86.69	337.66	149.89	9.2	30.83	13.858	9.26	5.109	109	1.4	761	771	10	113	25	0	248	3.26	3.962	34.819	3.442	617	481	303	10.51	24.6	8.8	1853	1698	317	26.33
34769	2	2	70	5			1	2	2					2	2	3.2	255	2194	79.88	365.51	189.09	20.1	51.52	16.124	20.444	10.588	229	8.33	960	1027	67	748	126	0	745	1.661	2.999	23.838	2.51	417	174	379.7	7.28	46.3	81.7	1226	1477	334	13.06
34771	1	2	60	3	3.85		1	2	2					1	3.2	6.1	314	1533	45.75	209.42	105.64	10.8	60.78	21.283	20.968	12.962	192	6.62	441	473	31	224	241	0	707	0.93	1.296	14.59	1.255	249	104	200.3	1.64	68.5	31	600	685	201	7.85
34774	2	2	62	2	0.78		1	2	2					1	3.3	5.4	374	1317	44.93	177.7	121.7	6	49.11	18.311	14.432	12.861	90	4.14	188	212	44	262	1	1029	265	0.651	1.424	10.869	0.86	138	34	147.5	18.23	19.7	30.5	802	1210	187	8.35
34776	1	1	50	2	1.01		1	2	2					1	4.3	12.2	346	1438	43.93	208.33	137.72	4.7	48.81	15.254	20.448	8.085	500	1.97	177	183	0	68	10	835	394	0.702	1.133	11.319	0.423	178	82	295.1	2.49	90.8	12.1	593	593	132	9.66
34777	2	2	74	1	0.84		1	2	2					1	2	4.2	420	1509	57.79	166.56	64.23	15	71.12	21.962	31.223	11.49	501	5.19	193	268	51	857	30	2	736	0.656	1.193	12.865	1.637	231	46	345.5	3.93	22.8	47.1	411	972	220	10.73
34779		2	67	4	2.48		1	2	2					1	1.9	4	287	2125	65.3	274.19	153.63	11.4	88.48	26.049	34.502	21.553	445	6.64	509	1446	1331	10473	199	203	1561	1.134	1.504	18.466	0.939	255	123	298	1.59	41.2	69.5	373	764	156	11.68
34781	2	2	48	4		2	1	2	2		2	1	2	1	3.8	5.9	407	1665	47.8	260.78	154.29	12.5	50.82	16.743	16.298	12.539	111	4.12	81	179	262	1036	44	1312	668	0.903	1.424	24.745	2.485	190	81	171.1	16.3	42.2	39.9	395	733	138	9.38
34782	2	2	85	2	1.12		1	2	2					2	3.2	2.9	207	1104	55.03	118.36	40.6	6.4	45.64	17.628	15.139	4.251	314	2.06	291	312	19	206	41	0	325	0.903	1.485	16.245	1.65	208	121	233.7	5.91	41.3	38.8	460	780	132	13.78
34786	1	1	39	5	4.85		2	2	2		2	1	2	2	1.2	2.6	227	2531	145.23	277.06	142.87	31.6	82.26	35.139	32.916	15.013	287	11.41	235	801	179	6674	7	2933	11823	2.079	3.322	46.806	3.294	790	19	606.7	7.5	253	551.2	849	1776	590	18.89
34788	1	1	85	1	1.52		1	2	2					2	1.9	3	156	1553	54.45	228.5	97.29	16.8	48.97	13.072	17.913	13.084	283	4.13	205	256	186	513	14	3504	451	0.917	1.372	11.988	1.23	258	93	276	2.15	179.5	27.5	545	1112	222	12.07
34790	1	1	40	3	3.1		1	2	2		2	1	2	1	3	8	263	3898	96.92	555.47	288.14	27.5	150.41	52.396	59.189	28.674	309	10.54	1048	1371	719	3220	762	33704	1561	4.238	4.013	41.899	3.921	1334	707	404.8	6.62	430.5	100.4	1593	2203	474	35.76
34792	2	2	20	4	1.51	1	1	2	2		2	2	2	2	1.8	7.8	278	2713	113.11	376.04	168.68	23.1	88.59	31.102	31.979	15.637	306	7.02	263	414	103	1781	5	8188	794	3.015	2.572	29.333	2.152	326	144	416.1	2.72	95.4	83.5	872	1724	469	21.3
34795	1	1	44	5	5		2	2	2		2	1	1	1	2.3	4.2	243	2060	81.9	96.06	12.94	7.7	93.4	43.033	32.266	10.561	334	5.66	450	485	0	444	0	0	478	0.866	1.574	23.524	1.945	171	51	334.4	9.71	24	49.4	351	971	185	10.4
34797	1	1	41	5	3.41		1	2	2		2	2	2	1	4.2	3.9	300	2806	91.64	351.65	110.8	14	73.99	26.651	20.973	19.545	299	6.75	360	429	56	517	540	1260	1285	3.343	2.96	30.566	1.929	745	350	410.3	4.02	176.3	40.1	1524	1585	342	19.64
34798	2	2	34	5	3.62	1	1	2	2		2	2	2	2	2.1	7.3	150	2885	99.42	475.71	260.36	33.2	73.32	34.607	21.958	9.675	206	4.79	1048	1108	51	661	15	17582	481	2.124	4.211	28.997	3.029	1189	922	337.2	9.52	69.9	41.5	2121	2234	506	46.23
34799	2	2	28	3	3.11	1	1	2	2		2	1	2	2	2.1	7.1	242	2577	78.64	421.64	183.16	24.9	69.24	27.352	21.583	13.433	320	7.97	403	812	1273	4183	234	11280	1681	2.088	3.077	19.482	1.409	525	286	326.2	3.83	137.4	110.8	1784	1834	305	16.94
34805	2	1	31	4	1.11		2	2	2		2	2	2	2	2.9	3.6	332	2901	98.53	303.44	150.34	11.4	143.82	68.603	48.883	16.768	358	5.87	691	731	1	463	2	12324	237	1.452	2.139	16.486	0.746	306	160	183.8	3.43	11.8	55	2227	1874	277	16.2
34807	2	2	59	4	3.98	2	1	2	2					1	1.7	3.2	280	2536	78.35	259.2	154.37	13.7	135.99	68.434	42.405	12.335	433	6.02	748	766	0	167	1	0	274	1.017	2.617	18.756	1.16	209	50	306.3	5.18	14.5	26.9	1039	1532	311	13.11
34812	1	1	63	1	2.08		1	2	2					1	2	3.2	219	1578	86.16	175.46	69.79	25.6	61.71	24.405	18.154	13.663	187	3.97	283	305	16	226	171	0	360	1.003	1.876	18.386	1.559	270	7	275.6	3.95	83	33.3	1347	1768	341	6.6
34813	1	2	62	4	1.79		1	2	2					1	1.7	4.1	238	2365	105.22	241.62	147.67	15.2	85.99	33.14	30.258	16.407	314	10.44	313	350	11	395	90	7340	576	0.759	1.871	23.477	1.285	217	58	327	4.2	36.7	27.8	1098	1412	335	11.97
34819	2	2	74	3	0.52		1	2	2					1	2.3	4.7	293	2200	70.55	235.3	86.66	12.1	110.53	28.612	44.826	28.457	582	6.44	587	600	17	148	37	0	542	1.669	2.227	18.876	1.619	252	101	436.1	3.34	30.1	52.7	682	1209	206	11.08
34822	1	1	46	4	1.43		2	2	2		2	1	2	1	2.3	3.9	219	2165	112.16	147.5	38.17	23.5	75.96	36.085	27.172	4.592	304	6.91	285	397	68	1259	114	32188	494	0.86	1.988	26.173	2.21	287	32	551.7	7.84	41	46.8	1263	1714	359	17.89
34824	1	2	34	3	0.97	1	2	2	2		2	1	2	1	1.7	6.6	352	2295	84.15	241.25	119.31	8.6	111.18	36.431	43.155	20.862	298	5.38	560	590	35	361	33	4692	278	1.752	2.302	29.549	2.566	576	453	284.1	11.39	23.8	51	643	979	192	26.87
34827	2	2	54	3	1.29	2	2	2	2					1	1.2	2.4	249	863	64.46	120.99	78.27	8.2	15.88	3.094	6.472	4.839	78	18.67	777	869	148	959	17	3454	3474	1.895	2.367	35.332	2.671	514	213	247	6.77	62.8	50.4	1131	1297	275	21.43
34828	1	1	21	4	1.04		2	2	2		2	2	2	2	1.7	2.9	147	4574	107.2	679.28	426.94	21.6	163.11	53.858	57.648	39.043	328	12.51	343	586	913	2398	108	612	936	1.881	1.972	38.199	3.371	503	123	338.5	1.68	201.4	105.4	775	1381	394	16.89
34831	1	1	34	4	1.07		2	2	2		2	1	1	1	3.3	7.1	280	2573	114.2	232.47	166.76	7.1	133.74	29.291	50.741	44.614	325	10.05	209	225	2	206	0	2195	87	0.789	1.241	34.936	2.148	181	76	316.4	2.14	119.7	304.7	423	946	182	10.46
34837	1	2	39	3	3.33	2	2	2	2					2	2.2	4.5	236	2908	120.18	346.55	136.34	19	127.42	45.685	46.796	22.832	416	8.42	591	655	17	753	34	0	1199	2.016	3.37	27.636	2.276	362	156	382	4.34	94.3	144.3	1519	2347	300	16.81
34838	2	2	31	3	0.2	2	1	2	2		2	1	1	1	3.5	4.2	406	1916	92.86	252.83	211.34	13.5	61.67	26.895	21.508	7.953	247	4.79	607	720	1	1393	0	686	1856	1.079	2.629	16.24	2.349	292	44	436.1	9.3	276.9	194.5	1341	1548	263	12.91
34839	1	1	29	4	5		2	2	2		2	1	2	1	3.2	4.6	287	2125	78.67	227.24	60.37	8.7	73.68	15.875	30.351	22.238	209	5.77	327	587	545	2828	6	641	2786	1.37	1.428	31.387	1.983	401	188	266.4	1.45	41.2	204	429	897	273	14.08
34843	1	1	79	2	1.56		1	2	2					2	1.1	3.7	155	1411	57.32	236.88	107.46	18	32.78	10.434	12.63	5.95	100	3.74	471	675	690	2065	62	515	885	1.649	2.329	26.586	2.945	389	226	236.4	6.23	151.4	71.7	353	906	261	16.93
34845	1	1	29	2	1.37		2	2	2		2	1	2	2	2.7	7.2	249	2705	93.88	345.93	156.15	14.5	107.28	40.539	45.146	12.592	263	4.07	408	447	63	451	16	12843	264	1.476	2.091	21.256	1.799	317	153	315.8	6.79	20.4	32.2	1019	1541	285	14.82
34848	1	1	23	2	0.68		2	2	2		2	1	2	1	2	6.7	277	6365	246.44	405.68	95.03	27.1	199.11	78.26	86.334	16.039	657	4.21	404	430	9	324	10	4867	373	3.211	4.495	57.676	5.924	594	41	1313.5	18.82	68.9	33.9	1420	3410	749	25.93
34849	1	2	71	2	1.47		2	2	2					1	1.8	3.7	200	1708	37.23	202.58	147.65	5.1	63.45	25.465	22.747	9.77	150	1.95	267	282	20	203	1	515	131	0.713	1.539	7.382	0.519	139	68	172.5	3.67	2.6	27.4	898	845	187	9.9
34850	1	1	71	3	4.92		2	2	2					1	1.2	3.6	210	1268	41.9	245.97	89.66	30.9	17.03	3.474	5.521	6.403	41	8.57	278	717	96	5187	106	4	5905	1.297	1.777	22.949	3.358	592	107	263.9	4.1	268	600.4	473	826	348	14.17
34851		1	56	2	1.53		2	1	2					1	2.5	3	236	1379	40.1	194.38	89.11	4.9	48.56	17.295	19.597	4.359	105	0.41	44	44	0	1	0	0	79	1.187	0.922	13.13	0.652	210	155	141.9	3.07	1.3	14.1	448	505	88	9.51
34855	1	2	76	2	2.55		1	2	2					1	45.2	3.4	564	1683	119.52	161.27	57.15	11.1	60.64	14.046	24.43	16.067	292	2.83	58	104	219	427	24	1544	555	0.816	0.875	35.491	3.394	136	0	452.1	4.72	55.6	81	146	1047	230	9.98
34856	2	1	50	3	4.97		1	2	2					2	3.1	2.6	163	2109	77.52	280.58	136.45	18.6	83.41	18.748	32.66	25.194	194	11.15	119	504	49	4513	162	12531	345	1.276	1.636	24.706	1.456	336	77	216.7	1.86	176.2	60.4	537	1132	317	12.12
34857	1	1	85	3	1.46		1	2	2					1	2.8	4.7	223	2422	83.78	269.76	138.59	13.5	114.77	34.759	47.762	24.635	340	14.05	595	1038	1617	4527	15	1822	569	1.316	2.367	23.99	2.242	325	135	408.7	7.98	61.2	55.7	851	1290	295	13.45
34858	1	2	37	4	1.68	2	2	2	2		2	2	1	2	2.2	4.9	469	2193	77.19	272.34	142.7	13.7	90.39	29.27	38.22	14.796	197	4.54	82	134	70	536	100	1707	64	1.176	0.978	16.767	1.318	159	94	211.7	5.15	6.1	27.5	558	1183	198	12.56
34864	1	1	54	1	0.72		1	2	2					2	2	3	463	1905	47.74	256.07	63.75	17.3	36.13	12.348	11.974	9.34	199	3.19	127	146	13	236	11	4328	378	0.865	1.347	17.3	1.478	337	86	292.5	0.94	54.9	21.2	649	1187	330	8.31
34867		1	23	4	2.51		2	2	2		2	2	2	1	1.9	4.2	333	3066	88.45	368.06	226.17	9.3	99.07	31.417	43.413	14.485	264	3.18	79	108	5	273	48	427	236	1.173	1.516	28.989	2.12	256	81	392.2	4.41	300.9	28.5	456	1020	270	11.31
34869	2	2	29	4	0.9	2	2	2	2		2	2	1	2	2	1.9	219	1811	99.13	147.13	63.02	6.3	92.4	32.899	32.673	15.677	428	5.92	294	369	7	808	165	8430	565	0.626	1.251	24.694	1.518	128	19	347.8	4.55	19.3	70.2	771	1251	192	9.65
34870	1	1	38	4	3.27		2	2	2		2	2	1	2	1.8	8.1	260	4421	303.67	256.46	111.23	5.6	228.82	46.94	93.934	70.54	1145	16.62	395	415	8	115	239	0	631	5.185	5.489	66.641	2.725	526	190	1078.6	86.76	103.8	114.5	1351	4138	386	30.52
34873	1	1	73	1	0.55		1	2	2					2	1.8	3.4	183	1779	57.24	232.19	119.89	24.1	76.66	19.194	34.137	18.58	42	11.41	356	1113	5	9026	127	1	16151	1.572	1.776	23.088	1.571	635	137	163.8	3.86	134.1	732.9	993	1119	325	15.88
34874	2	2	57	4	3.1	2	1	2	2					2	2.7	4.1	295	2938	141.44	384.17	124.82	23.4	94.13	32.575	39.392	10.697	308	4.61	430	756	1009	3366	100	15618	1500	3.216	3.751	42.745	3.431	689	435	419.7	10.75	91.1	63.2	1371	1961	374	32.14
34875	2	2	51	3	5	2	2	2	2					2	1.9	4.8	312	1108	51.84	104.45	7.14	6.7	53.01	19.899	18.468	10.244	134	2.88	168	258	38	1064	2	7471	1375	1.154	1.142	14.293	0.653	220	149	109	1.1	16.5	64.2	630	688	121	9.74
34877	1	1	54	3	1.95		2	2	2					2	3.1	3.6	254	2887	118.44	396.56	220.28	20	94.37	23.557	40.935	22.744	358	6.7	342	446	136	1067	188	2663	1698	2.921	2.232	32.535	2.744	370	135	458.2	4.67	118.4	108	611	1443	380	19.44
34881	1	2	26	5	5	1	1	2	2		2	1	2	1	1.6	9.1	261	2246	86.02	329.4	178.01	17.9	68.68	29.259	25.008	7.703	214	3.81	548	562	3	161	12	0	160	1.503	2.276	22.89	2.236	309	182	295.5	8.35	37.2	44.8	1085	1586	263	15.82
34882	1	2	28	5	5	2	1	2	2		2	1	2	2	1.6	3.3	494	1079	42.14	154.29	95.81	11.3	34.59	11.735	14.079	5.404	104	3.92	818	1310	1853	4857	234	1650	1363	1.462	1.604	16.282	2.038	341	178	173.4	2.13	129.8	104.9	838	786	239	16.02
34885	1	2	40	5	4.39	2	2	2	2		2	2	2	2	1.9	5.4	308	1493	42.81	253.44	125.41	14.2	39.39	13.357	13.634	9.525	132	3.85	979	1036	63	565	198	672	1431	1.757	2.353	22.893	1.869	487	230	191.3	0.75	60.7	72	456	835	291	19.76
34886	2	2	43	1	3.12	2	1	2	2		2	1	2	2	2.4	6.4	388	2022	73.55	281.49	128.1	31.2	73.09	21.334	23.642	22.398	158	8.51	952	991	33	335	255	0	603	1.8	2.427	23.285	2.175	478	169	234.8	5.5	134.7	40.6	1004	1363	322	23.71
34887	1	2	52	4	5	2	2	2	2					1	1.3	5.6	280	1602	46.42	102.55	24.83	5.1	68.53	25.302	29.46	8.966	150	2.89	327	355	12	149	323	0	359	0.84	0.936	11.996	0.73	141	51	124.7	3.02	78.7	28.5	765	1039	140	6.35
34893	2	1	38	4	5		1	2	2		2	1	2	2	1.6	1.7	247	1434	63.25	201.26	115.24	6.4	43.42	18.683	15.395	6.199	132	2.25	186	245	82	655	0	6569	236	1.244	1.157	16.557	1.189	189	74	168.7	2.53	21	26.6	1030	1147	188	6.75
34897	1	2	45	3	0.94	2	2	2	2		2	1	2	2	2.6	4.5	236	1589	68.06	175.02	42.08	15.8	62.3	16.711	27.649	14.099	167	9	92	503	1778	4011	36	515	1376	1.871	1.292	22.484	1.306	300	126	306.3	5.31	96.3	71.5	437	1036	249	11.32
34899	1	2	84	4	5		2	2	2					1	2.1	3.5	181	1223	52.78	146.29	57.26	17.4	39.69	7.324	9.622	19.305	276	3.54	100	155	26	473	375	6293	834	1.077	0.995	11.312	1.021	240	68	295	0.95	120.8	15.2	447	827	292	12.43
34901	1	1	53	4	4.22		2	2	2					1	2.8	3.9	318	3315	90.64	461.71	216.1	11.3	126.21	35.529	49.05	32.698	494	14.04	381	430	8	598	8	0	1172	2.964	2.552	26.345	2.534	585	359	399.7	4.46	12.6	98.6	595	1458	301	19.69
34905	1	2	57	4	1.04	2	1	2	2					2	1.6	5.2	352	1789	58.53	221.5	120.59	10.1	76.46	20.742	27.58	22.098	163	13.39	111	178	199	522	368	0	615	1.211	1.88	19.018	1.072	255	90	162	0.84	105.8	66.3	651	847	234	9.2
34906	1	2	44	5	0.52	2	2	2	2		2	2	2	2	2.3	5.1	360	1763	70.45	230.46	113.52	17.1	66.79	17.013	26.4	14.291	186	8.11	150	232	50	880	139	14651	390	0.562	0.874	20.312	1.588	200	48	184.6	0.82	58.5	51.6	353	924	269	10.12
34908	1	1	47	5	5		1	2	2		2	1	2	1	1.4	3.7	290	3664	132.72	295.45	48.79	18.7	132.06	37.314	37.229	46.454	428	13.96	423	560	107	1551	18	2341	1407	2.136	2.68	47.83	3.531	819	266	692	3.24	48	213.4	1522	2182	513	22.05
34910	1	1	85	1	1.71		1	2	2					2	1.7	4.3	251	2025	70.93	268.15	157.98	9.5	77.25	27.975	30.351	14.135	630	3.28	975	1162	573	1679	18	1477	1296	2.648	3.776	32.201	3.381	596	372	453.2	13.11	33.5	61.5	966	1262	170	30.07
34911	1	2	70	4	1.58		1	2	2					1	2.7	6.2	298	1463	54.14	171.59	26.22	18.5	45.52	11.867	15.413	14.143	240	9.1	350	1168	3510	8018	4	0	1081	0.934	1.512	15.924	2.219	200	56	376.2	4.61	22.8	92.5	337	1135	240	11.93
34913	2	2	81	4	2.05		1	2	2					2	2.2	3.7	261	1421	73.77	205.76	82.99	26.4	34.89	12.045	10.95	8.051	310	3.43	290	647	1372	3500	167	986	1054	0.986	2.039	12.71	1.997	398	98	428.4	3.6	101.7	33.5	854	1461	341	14.7
34914	2	2	28	5	4.97	2	2	2	2		2	1	2	2	2.3	3	419	3552	57.36	568.1	386.72	12.5	121.38	33.308	44.983	32.252	142	7.73	300	419	349	1255	53	3827	475	1.624	1.403	25.171	2.049	320	173	190.4	8.57	99.4	96	745	857	223	12.18
34915	1	1	41	4	0.61		1	2	2		2	1	2	2	2.7	5.3	254	6421	199.38	618.15	176.3	26.4	291.11	84.364	104.725	77.777	560	17.25	348	1157	3077	8152	25	749	2332	3.638	4.174	68.187	4.288	944	427	752.6	7.89	203.9	293.1	1423	2719	616	34.65
34919	1	2	28	2	0.48	2	2	2	2		2	1	2	1	1.9	1.9	245	3137	71.38	456.55	241.05	11.1	81.72	30.088	32.108	13.672	483	5.91	320	332	4	132	14	0	401	1.794	2.06	24.502	1.535	374	156	495.3	3.55	1.7	25	720	1059	264	16.58
34922	1	2	40	5	5	2	2	2	2		2	1	2	2	3.5	4	342	1859	49.67	304.13	174.11	21.6	31.98	5.755	13.079	9.359	14	32.37	253	630	1604	3682	57	0	1237	2.732	3.735	55.962	6.277	782	594	176	11.15	63.7	60.4	3231	1207	512	30.24
34925	1	1	35	5	5		2	2	2		2	2	2	2	2.2	4.1	256	3048	149.5	398.97	207.66	19.7	98.79	42.024	28.183	19.851	402	6.81	985	1011	2	215	123	0	535	1.804	4.666	48.222	4.612	803	592	508.2	6.02	72.4	34.8	1369	1919	347	25.03
34928	1	1	85	5	2.05		2	2	2					2	1.4	3.2	242	3184	90.18	425.97	283.27	25.2	133.9	58.416	44.597	20.869	329	11.18	931	1028	82	1011	189	1750	978	2.189	4.371	29.024	2.227	478	174	370.5	7.03	88.7	61.3	1808	2118	519	21.29
34929	1	1	21	2	1.04		2	2	2		2	2	2	2	2.1	2	241	4307	40.52	394.26	260.37	5.3	57.97	16.604	24.091	12.835	187	4.52	217	269	20	596	1	16616	134	0.743	0.985	14.401	0.681	174	109	122	0.65	8.1	34.8	326	674	125	8.72
34934	2	2	66	3	1.79		1	2	2					2	2.4	5.4	231	2537	141.41	167.57	73.11	20	152.92	42.341	72.491	20.834	359	13.91	80	254	84	1996	154	59578	1498	1.535	2.003	32.623	2.845	326	51	469.2	8.71	191.2	133.3	572	2094	657	25.67
34935	1	1	42	5	5		2	2	2		2	1	2	1	1.7	3.8	239	3168	143.55	317.28	102.2	21.9	152.72	51.702	56.056	33.32	479	14.57	284	599	749	3380	11	33308	1306	2.512	2.449	46.237	2.896	521	240	492.6	4.91	121.7	124.3	1115	2144	431	21.33
34941	1	1	39	5	3.54		2	2	2		2	1	2	1	1.6	3.2	231	2283	52.42	319.94	167.31	17.4	94.32	26.005	37.013	24.214	289	6.97	223	354	80	1322	299	16047	1586	1.482	1.43	14.705	1.459	287	95	282.2	1.38	250.4	70.8	731	993	281	12.58
34945	1	2	24	4	0.84	1	2	2	2		2	1	2	2	2.4	10.3	282	1800	49.72	271.49	152.08	9.8	60.51	20.921	22.883	10.886	116	11.86	252	344	72	574	746	5540	854	1.773	1.503	41.358	4.43	328	171	174.8	2.51	229.5	28.2	1212	892	184	12.75
34946	1	1	48	5	3.56		1	2	2		2	2	2	1	2.3	5.3	289	2650	89.06	271.27	183.58	19.6	111.27	27.753	39.481	36.968	136	9.87	351	506	0	1846	19	0	2828	0.985	1.809	24.367	1.348	284	12	247.5	4	43.5	214.8	1354	1613	381	8.47
34947		2	29	3	0.93	2	2	2	2		2	1	2	1	2.4	5.4	334	1464	119.68	138.49	48.36	20.2	48.7	14.062	16.699	12.348	405	7.76	212	858	889	7237	169	881	9129	2.908	4.493	31.035	2.58	397	28	409.6	1.97	128	454.3	687	1409	359	23.73
34952	2	2	25	3	3.01	1	1	2	2		2	1	2	2	2	6.1	239	3286	118.41	467.64	219.88	20.5	111.04	36.557	39.45	24.191	362	7.61	724	819	54	854	570	452	1411	2.388	2.451	32.411	1.787	605	250	320	4.05	284.3	61.4	1274	1929	340	16.39
34955	1	2	34	5	5	2	2	2	2		2	2	2	2	2.3	5.2	257	1426	51.48	165.65	68.24	13.9	64.08	24.723	19.679	14.373	154	5.62	296	670	263	4414	14	1603	4515	1.209	1.517	13.294	0.705	427	158	148.4	1.34	165.8	281.9	878	836	241	12.89
34956	2	1	45	1			1	2	2		2	1	2	2	1.9	4.1	226	2279	85.26	362.89	118.77	12	54.75	24.93	16.035	8.839	122	4.22	237	262	0	311	0	13981	193	2.742	2.604	23.715	0.842	514	346	135.4	2.91	54.6	21.7	1332	1445	192	16.02
34960	2	2	76	3	0.76		2	2	2					1	2.1	5.7	282	902	36.88	113.81	56.24	4.9	33.35	10.059	11.697	7.853	279	3.34	120	147	13	109	397	0	517	0.736	0.931	11.621	0.858	201	83	213.7	2.75	98.2	13.3	293	442	131	7.89
34962	1	1	54	5	5		2	2	2					2	1.8	3.8	277	2836	119.74	301.23	158.27	14	130.32	49.446	51.558	18.418	448	7.34	799	850	25	613	25	5539	1158	1.478	4.247	19.888	1.528	356	136	574.2	10.66	21.1	98.8	1723	2004	402	14.65
34965	2	2	59	1		2	1	2	2					2	1.5	2.6	206	909	45.4	137.68	14.79	27.2	21.54	6.045	9.388	4.221	48	2.31	45	159	209	1237	7	5148	637	0.956	0.6	7.788	0.877	434	24	156.4	0.32	34.6	55.4	415	893	298	9.22
34966	1	1	25	1	1.53		1	2	2		2	1	2	2	2.6	5.1	280	3318	113.47	409.38	150.43	38.8	142.49	29.969	50.384	48.165	262	15.59	70	108	26	425	54	3008	444	1.627	1.362	23.938	1.962	482	98	306.3	2.21	89.3	105	664	2020	508	18.84
34974	1	1	64	2	1.87		1	2	2					1	2.3	2.6	193	2772	88.08	464.28	166.26	38	69.19	18.157	24.324	20.222	519	6.12	255	279	41	284	11	999	726	1.983	1.826	23.33	1.539	474	143	388.7	1.66	20.9	46.5	535	1604	459	21.12
34975	1	1	63	5	4.07		2	2	2					1	1.3	3.7	290	2946	96.59	319.43	145.56	20.6	94.26	33.155	36.163	15.622	420	8.65	205	470	569	2896	9	41403	864	2.19	1.985	32.213	1.84	404	211	386.2	4.47	107.9	118.1	721	1222	289	17.91
34977	1	2	23	4	1.45	2	2	2	2		2	2	1	2	1.8	6	540	923	26.84	171.66	120.99	11.1	17.55	4.056	4.365	7.5	75	6.92	347	940	2257	5933	110	2316	1309	0.776	0.888	10.47	0.891	230	58	133	1.89	42.8	157.7	388	533	160	8.26
34985	1	2	30	3	1.86	2					2			2	2	4.5	337	2258	54.96	310.24	140.26	23.7	93.08	27.419	45.003	13.859	132	6.12	22	741	4224	6501	68	2516	679	1.559	1.467	17.602	1.024	492	208	179.8	2.13	87.3	75	449	660	194	14.64
34986	1	1	22	3	0.3		1	2	2		2	1	2	2	2.7	3.9	347	2845	102.63	352.73	199.95	17.5	115.45	40.601	47.394	19.973	235	9.73	341	437	16	1163	2	36067	687	1.604	2.267	27.335	2.182	363	162	346.7	6.65	80.6	153.6	1201	1614	333	16.61
34987	1	1	25	4	1.36		2	2	2		2	1	2	1	1.8	5.4	251	4303	138.26	625.14	245.35	52.7	136.5	41.82	52.502	30.078	245	7.26	502	564	40	533	372	8176	648	4.767	3.767	43.901	4.056	951	539	442.3	10.9	104.2	94.1	1523	2613	552	39.22
34988	2	2	71	2	0.78		1	2	2					2	1.6	2	236	928	27.01	154.29	68.05	18.7	26.41	10.719	8.811	4.594	37	2.18	400	442	64	182	152	0	633	1.857	1.862	19.698	2.654	641	218	126.8	5.91	101.7	6.7	497	579	200	18.86
34993	1	1	36	3	2.55		2	2	2		2	1	1	1	2.1	1.6	175	7215	153.11	1059.38	689.76	42.4	265.93	81.171	81.567	73.459	686	29.4	547	722	24	1575	240	28733	846	1.94	4.072	40.058	4.45	568	179	609.3	4.5	1383.3	195.9	1478	2477	749	27.57
34994	2	2	65	1	0.43		1	2	2					2	3.8	4.1	314	1801	61.47	237.76	21.7	27.2	67.87	28.316	24.208	10.75	125	2.67	247	250	0	53	1	0	21	1.982	1.629	16.255	1.071	530	273	175.8	1.85	6.9	24.6	908	1227	291	15.7
34995	1	2	60	1	0.99		1	2	2					2	2.4	2.9	283	1883	63.5	287.23	82.91	33.8	59.69	12.897	24.628	14.875	111	11.83	288	476	301	2096	31	4495	641	1.66	1.672	24.738	1.835	439	170	213.9	0.95	139	91.4	701	1332	441	17.56
34996	1	1	50	4	1.29		2	2	2					1	1.5	4	218	2940	92.15	171.67	9.3	4	142.04	61.393	59.256	7.127	846	1.69	61	63	6	19	0	0	148	0.676	1.27	21.274	1.669	307	145	1467.8	6.72	0	9.4	268	1092	219	13.01
34997	2	1	78	2	1.41		2	2	2					1	1.1	3.7	190	1633	48.08	248.52	96.82	20.5	54.22	11.514	20.54	17.768	53	4.44	260	276	30	170	16	0	250	0.983	1.398	12.266	1.265	249	88	194.5	2.65	23.6	41.9	701	907	284	7.25
34998	1	2	31	4	3.5	2	2	2	2		2	1	2	2	2.3	4.2	268	4013	151.73	488.27	279.28	16.8	168.93	53.934	66.139	35.173	546	8.39	481	573	6	1099	11	2155	1256	2.261	2.395	36.781	1.959	519	295	565.9	6.5	22.1	131	785	1742	355	28.61
34999	1	1	25	2	0.77		2	2	2		2			2	3.3	7	350	2577	98.7	371.74	168.67	18.2	79.62	19.058	28.703	21.2	592	7.5	277	372	0	1080	74	1091	600	1.514	1.688	29.502	1.611	423	206	406.2	2.11	45.4	51.7	701	1223	251	18.87
35002	1	2	24	4	1.99	3	2	2	2		2	2	2	1	2.3	4.4	197	2248	80.32	236.56	105.9	13.9	111.7	38.209	38.864	25.32	407	9.41	845	891	16	505	20	2411	732	1.629	2.282	27.616	2.044	409	241	359.5	5.46	24.8	94.2	866	1066	257	23.62
35004	1	1	69	3	2.68		1	2	2					1	1.6	2.3	271	2577	90.64	377.32	230.58	14.5	59.85	17.189	20.861	16.037	202	5.12	488	830	129	3752	536	4693	791	1.567	2.573	26.447	2.395	512	187	385.3	7.63	199.8	68	922	1401	385	21.32
35007	1	2	46	1	0.51	2	1	2	2		2	1	2	1	1.6	4.5	275	1682	53.57	304.6	115.85	28.2	32.34	9.34	9.713	9.341	260	2.82	281	570	909	2546	922	316	1444	1.586	1.716	19.183	1.774	410	94	268.9	2.1	330.4	37.3	683	1291	332	12.33
35010	1	2	38	5	5	2	2	2	2		2	1	2	2	1.2	3.5	269	924	40.3	80.64	17.68	4.7	49.13	10.072	15.196	20.322	113	3.47	216	239	32	242	2	787	226	0.733	0.707	18.107	0.988	179	125	107	0.64	4.7	31.3	315	373	97	7.71
35013	1	2	55	2	1.24	2	1	2	2					2	2.7	4.6	337	1653	75.99	219.2	111.13	14.3	55.42	20.091	22.153	5.375	505	3.49	216	390	452	1507	705	1102	1648	1.405	2.013	21.409	2.1	307	54	434.8	3.2	189.5	29.8	1062	1195	310	13.91
35015	1	2	28	5	2	1	2	2	2		2	2	2	2	2.6	8.2	308	2269	105.53	275.23	88.76	22.6	86.39	19.546	32.294	29.058	286	8.72	745	1004	110	2982	115	2618	3853	1.926	2.263	43.216	3.951	412	149	405.2	6.32	110.1	229.5	1033	1741	325	20.56
35017	1	1	56	1	3.73		1	2	2					1	1.9	3.9	247	1900	74.52	130.62	23.88	11.5	118.21	22.355	40.815	47.595	538	12.31	157	182	22	287	8	515	584	0.864	1.242	18.397	1.765	198	42	423.4	5.05	29.3	131.2	246	956	228	10.52
35018	2	2	66	2	1.25		2	2	2					2	2	4	206	1667	101.74	173.35	71.94	19.2	66.12	17.962	25.49	14.977	322	3.72	237	244	1	70	23	0	283	1.475	2.267	37.024	2.633	326	256	246.4	5.77	10.3	31.3	503	1196	230	16.48
35021	1	1	34	4	5		2	2	2		2	2	2	2	1.8	8.2	261	2008	64.24	278.76	46.15	24.4	72.62	14.135	31.554	19.506	27	10.24	845	848	0	31	1	0	50	8.65	1.674	25.276	2.552	437	74	138.5	7.48	12.6	60.5	1011	1622	269	15.65
35022	2	2	29	5	4.82	2	1	2	2		2	2	2	2	2.3	3.2	332	2253	84.67	339.67	148.12	26.7	66.21	25.23	25.073	11.323	315	6.49	1163	2374	5021	12047	7	1	700	2.358	3.704	21.244	3.491	844	580	372.5	11.89	52.5	34.4	1745	1988	401	18.22
35023	1	1	48	2	1.24		1	2	2		2	1	2	2	1.6	3.8	275	2266	95.34	295.6	121.38	10	77.94	19.97	25.786	25.021	580	7.56	280	304	19	266	50	2506	414	1.429	1.693	27.706	1.267	340	197	378.9	3.28	9.9	62.3	817	1394	274	19.4
35027	2	2	25	4	2.58	1	1	2	2		2	1	2	2	1.6	4.4	323	1752	69.05	209.11	61.64	22.9	73.91	29.532	29.576	11.43	177	5.11	194	270	17	611	567	2510	593	1.142	0.931	23.068	1.614	429	74	218.6	0.86	141.7	36.5	793	1158	269	11.13
35029	2	2	45	5	1.14	2	1	2	2		2	1	2	1	1.9	4.7	328	3564	139.25	462.34	243.6	27	132.05	51.254	40.801	29.707	361	9.65	606	750	326	1186	730	0	785	2.312	2.896	21.298	2.83	702	261	426.8	9.3	196.7	76.2	2093	2409	455	17.33
35035	2	1	49	2	1.94		2	2	2		2	2	1	2	2.2	4.3	280	3331	100.46	336.55	176.97	23.6	186.25	58.603	68.191	41.526	239	20.42	415	424	5	106	9	1641	100	1.337	3.669	34.321	1.993	422	88	356.4	4.64	44.3	104.6	956	1627	433	14.84
35038	1	2	37	5	5	2	1	2	2		2	2	2	2	1.8	4.5	258	1895	80.63	212.08	37.9	23.5	83.72	20.488	32.624	23.135	97	6.76	65	226	279	1403	716	2316	1345	1.891	1.372	20.895	1.527	623	240	275.4	1.31	96.5	138.5	794	1057	367	18.04
35041	1	2	76	4	1.67		1	2	2					1	1.5	1.9	305	1875	52.04	202.2	103.55	14.6	102.45	27.424	39.669	29.113	159	11.9	2638	3159	793	5825	17	33726	820	1.453	2.817	22.15	1.314	447	158	324.6	12.55	150.4	124.4	622	928	272	18.22
35042	2	2	23	2	2.61	1	2	2	2		2	2	1	2	3.5	5.9	303	2330	59.77	335.27	169.37	18.1	87.84	27.191	31.472	20.626	188	8.59	717	840	295	1279	95	1078	829	2.024	2.599	27.596	2.859	792	609	223.2	6.63	193.1	103.2	1125	1262	272	21.57
35045		2	24	1	0.95	2	1	2	2		2	1	2	2	2	5	241	2315	89.35	250.85	45.62	31.6	111.46	20.666	50.636	33.277	222	13.01	110	113	0	51	4	1281	221	1.225	1.455	29.142	1.297	693	204	306.4	1.33	13.3	50	616	1265	452	17.15
35047	1	2	36	2	1.04	2	1	2	2		2	1	2	1	2.5	4.2	304	1500	47.69	232.11	96.47	10.5	44.98	10.746	17.362	12.345	117	2.73	24	42	5	210	6	3617	323	1.322	0.872	13.597	0.871	201	148	151.1	0.78	41	32.6	503	803	158	11.13
35048	1	2	31	5	5	1	2	2	2		2	1	1	1	1.6	5.5	198	2127	145.53	217.38	86.53	22.5	79.84	30.06	23.335	19.777	307	9.56	633	1053	154	4973	35	3869	5344	1.472	2.124	47.148	3.079	641	120	550.3	6.05	126	373.3	1467	1755	496	22.86
35051	2	2	25	4	1.68	2	1	2	2		2	1	2	1	2.8	5.6	558	1393	60.95	166.86	69.59	12.7	55.67	12.994	16.675	19.717	223	3.58	160	203	92	492	4	0	202	0.654	1.838	11.276	1.104	121	48	254.5	4.22	24.4	31.7	925	1089	276	8.29
35053	2	2	80	5	5		1	2	2					2	1.9	3.8	271	871	38.11	103.43	61.34	12	35.39	9.863	11.5	10.99	271	5.75	292	1390	4506	10807	258	1199	2190	0.658	1.234	6.229	0.949	176	20	252.4	2.42	83.9	90.6	729	708	155	5.44
35055	2	2	46	4	2.73	2	2	2	2		2	1	1	2	2.4	2.3	246	1718	75.12	196.54	113.96	12	72.08	25.547	26.636	15.203	245	5.79	363	686	226	3449	631	2	6082	0.703	2.992	24.922	1.49	184	68	287.3	1.61	51.2	292.3	799	1065	209	7.34
35056	1	2	35	4	0.72	2	2	2	2		2	2	1	1	3.7	2.4	347	1774	59.01	214.4	102.56	7.2	75.75	29.433	29.451	10.518	170	2.88	133	140	2	82	4	1110	55	0.985	0.999	14.936	0.767	203	136	129.9	3.32	5.9	20.8	685	799	141	11.38
35058	1	2	32	5	4.5	2	2	2	2		2	2	2	2	2.5	2.9	263	693	26.21	61.6	19.16	6.5	44.69	14.78	13.441	11.783	128	3.25	107	200	313	944	13	1666	280	0.179	0.422	5.004	0.528	71	8	99.9	1.58	34.3	72.7	296	448	135	4.42
35061	1	1	71	5	5		2	2	2					1	1.4	3.9	290	3072	90.79	379.86	200.21	24.3	135.29	61.34	38.5	16.602	261	10.83	239	339	108	1138	3	18788	507	1.747	1.753	31.165	1.906	401	238	316	4.18	29.7	137.2	1096	1311	453	16.23
35062	1	1	46	2	1.16		2	2	2		2	2	1	1	2.5	2.5	246	6439	293.75	533.25	230.82	37.1	323.99	133.304	110.988	51.839	1535	12.3	1495	1618	198	1323	82	12697	1572	2.757	5.529	53.695	4.186	759	248	1188.6	19.87	118.1	82	3417	4444	703	55.83
35063	1	1	46	4	1.22		2	2	2		2	2	1	1	1.2	5.5	208	4030	167.57	586.35	314.29	20.6	119.35	47.691	43.471	17.436	629	6.75	1600	1909	153	3477	354	2700	1940	3.697	7.81	42.858	4.882	894	523	766.5	19.83	222.6	48.7	3200	3226	592	40.91
35067	1	1	54	4	3.57		2	2	2					2	1.6	3.5	236	2037	54.34	201.42	110.32	8.5	115.31	51.985	44.134	9.84	292	2.44	518	527	0	87	3	0	105	1.176	1.984	14.311	0.605	218	148	230.5	3.88	2.8	14.7	800	1056	164	9.53
35076		1	29	4	4.18		2	2	2		2	2	2	2	2.7	5.4	258	3504	113.22	424.53	138.04	20.8	128.98	36.284	51.729	29.36	694	15.52	759	898	81	1599	31	20453	840	2.441	2.916	38.3	2.007	692	438	550.4	4.53	141.3	195.1	890	1517	340	24.12
35077	1	2	50	3	1.18	2	2	2	2					2	2.3	6.1	313	2757	84.46	422.37	293.8	15.9	88.34	30.587	36.736	13.42	598	12.79	287	337	28	561	57	13737	587	1.205	2.215	30.066	3.198	233	85	497.2	5.91	53.2	36.5	1021	1847	246	16.47
35078	1	2	47	2	1.16	2	2	2	2		2	1	1	1	2	5	360	3720	81.49	624.93	421.58	28.2	68.95	19.073	26.549	18.141	148	7.84	97	1118	3929	10014	119	3468	2371	1.912	2.177	25.512	1.865	359	205	239.6	3.11	863.6	62.7	717	1149	387	18.51
35079		2	84	2	3.42		2	2	2					2	1.8	3.2	277	1124	54.43	121.99	24.41	12.9	47.84	13.572	18.096	11.943	285	3.23	788	799	3	139	4	0	404	1.565	1.797	16.817	1.339	526	424	254.3	4.33	52.2	146.3	739	941	217	19.12
35080	1	1	52	3	5		2	2	2					2	2	3.3	335	2236	93.96	166.79	86.42	9.6	103.02	41.306	40.764	11.065	364	4.92	400	506	2	1285	0	2249	1314	1.382	2.599	28.105	2.148	353	48	503.5	4.86	137.8	346.1	817	1328	257	8.16
35081	1	1	49	5	5		2	2	2		2	1	2	2	1.4	2.3	295	2852	100.33	304.05	104.52	29	82.69	20.739	40.517	14.984	162	12.83	224	309	57	1001	41	14059	307	1.79	2.049	30.817	2.523	370	169	359.6	3.25	125.5	43.3	1022	1746	563	20.37
35082	1	1	23	1	1.71		1	2	2		2	1	2	1	2.5	5.5	324	2077	61.44	367.04	138.77	26.1	43.83	12.031	18.157	9.446	105	3.49	7	719	2830	7144	16	1115	1250	1.861	1.562	24.817	3.159	415	158	235.4	0.82	338.2	59.3	456	1224	356	13.68
35084	2	2	32	3		1	1	2	2		2	1	2	2	2.3	7.3	305	1743	59.75	281.59	124.5	13.4	45.39	16.324	15.956	8.483	422	3.69	429	464	33	212	392	4629	824	2.359	2.187	17.626	1.418	709	494	307	3.72	152.4	18.5	1119	967	193	26.44
35087	1	2	60	5	2.34		1	2	2					2	1.7	7.2	310	1100	37.59	155.05	130.3	7.4	41.68	11.874	14.99	9.813	401	6.03	317	831	37	6046	224	5	13403	0.604	1.837	11.537	1.076	392	0	308.6	2.81	133.1	532.9	886	887	381	6.89
35091	2	2	36	5	3.5	2	2	2	2		2	1	2	2	1.3	3	154	1963	97.49	259.12	49.68	15.5	56.96	19.031	20.248	11.569	229	8.6	277	385	70	1278	16	17417	700	2.289	1.845	32.512	2.07	513	392	286	3.68	41.2	136.7	748	1221	280	14.77
35092	2	2	72	5	1.64		2	2	2					2	2.4	4.2	342	1343	42.89	195.52	106.83	10.7	46.24	17.124	16.247	8.386	76	5.82	286	367	229	877	20	731	503	0.721	1.115	11.765	1.571	138	41	182.7	3.98	30.2	31.3	555	797	192	7.38
35094		1	62	5	3.01		1	2	2					2	2.3	3.2	271	1571	76.83	248.5	70.77	23.5	32.41	14.592	9.86	3.867	128	3.76	82	242	91	1778	185	918	1852	1.48	1.431	19.429	1.898	521	218	286.7	3.17	193.8	215.7	676	964	276	14.14
35099	1	1	80	2	1.43		2	2	2					1	2.1	5.1	223	1895	89.67	184.59	87.37	8.9	89.13	34.608	33.441	10.652	664	3.84	585	727	518	1222	432	38	804	1.773	2.741	27.243	1.992	521	356	482.5	7.99	110.3	13.5	1066	1209	204	18.34
35100	2	2	60	1	1.84		1	2	2					2	3.1	1.8	284	535	19.74	100.17	37.4	5.1	7.55	1.43	2.265	2.923	46	1.18	8	68	407	448	147	0	163	0.474	0.328	6.654	0.711	156	71	62.3	0.14	74.1	8.6	187	217	116	4.08
35102	1	2	23	4	2.65	2	2	2	2		2	1	2	2	2.3	3.5	290	3201	127.19	378.37	253.5	11.5	134.41	40.368	46.529	38.595	557	9.31	981	1068	95	811	165	1599	1461	2.063	3.239	45.534	3.614	405	188	475.3	7.42	262.5	103.1	1109	1637	302	16.42
35108	1	1	31	3	3.12		2	2	2		2	2	2	2	1.7	5.4	240	2945	107.91	435.62	224.78	14.9	89.09	27.571	31.201	22.931	153	18.48	1084	1257	587	1476	626	11494	550	2.533	3.098	37.249	2.676	703	329	323.6	6.21	100.9	255.2	1667	1969	483	27.78
35112	1	2	20	3	1.16	2	2	2	2		2	1	2	2	2.9	2.6	261	1232	22.28	189.5	81.58	6.8	43.98	13.104	17.58	10.982	28	5	375	395	0	243	0	0	181	1.068	0.737	9.295	0.949	153	73	70.3	1.43	97.9	40.7	319	344	105	7.76
35113		2	21	4	1.29	2	2	2	2		2	1	2	1	1.5	1.1	198	2717	97.45	263.53	121.73	8.8	85.55	30.563	28.588	14.875	266	4.38	179	208	41	306	5	1029	248	1.95	1.733	27.712	1.504	279	170	288.6	5.06	26.9	37.9	946	1414	223	14.35
35117	1	2	53	3	5	2	2	2	2					1	1.9	4.5	232	1917	62.25	190.86	54.41	11	100.91	42.182	46.461	9.163	200	2.72	138	169	3	364	5	9237	266	1.163	1.479	15.534	0.83	274	161	212.7	4.45	9.3	35.8	649	946	190	12.66
35119	1	2	46	4	2.48	2	2	2	2		2	2	1	2	2.3	5.5	289	2390	95.5	168.05	38.83	8.2	138.12	61.722	44.525	22.413	421	10.47	872	912	31	461	17	606	113	1.249	2.887	16.33	1.94	335	145	298.2	6.67	19.3	56.8	1070	1384	252	10.72
35120	2	1	76	1	1.97		1	2	2					2	1.1	3.2	245	1011	50.37	65.18	59.49	0.3	61.29	21.56	25.8	7.708	563	2.55	388	393	0	78	9	835	338	0.515	1.458	9.384	0.626	65	4	365.9	4.36	2.2	7.7	557	814	114	5.05
35121	1	1	73	4	3.03		1	2	2					2	2.2	3.5	191	1374	53.15	196.34	115.98	21.7	48.99	9.428	11.259	24.007	88	8.72	379	581	196	2214	217	0	5384	1.506	2.031	25.28	2.418	533	215	170.8	5.02	101.7	227.2	804	961	325	18.05
35122	1	2	70	3	2.2		2	2	2					1	1.9	3.3	282	1708	78.97	175.83	60.32	9.1	54.68	17.858	16.79	14.061	212	6.27	473	522	55	364	351	515	1212	1.743	2.593	37.199	3.196	387	222	260.8	6.11	60.4	34.2	605	1014	261	18.68
35128	2	1	48	4	3.03		2	2	2		2	2	2	2	2.3	3.7	288	3335	57.36	505.01	315.05	11.7	125.83	44.053	45.706	27.245	174	10.25	989	1025	7	391	35	3490	223	1.614	1.993	15.928	1.104	393	209	158.6	2.63	51.5	88.3	1180	1068	187	14.89
35131		1	47	5	4		1	2	2		2	2	2	2	2.3	4.6	248	1097	23.07	215.02	86.31	20.2	12.79	2.676	4.548	4.534	0	7.3	68	279	139	2442	90	1158	399	1.096	0.831	13.052	1.227	287	122	111.6	0.5	146	56.4	266	418	201	7.99
35133	1	2	51	4	3.48	2	2	2	2					2	1.5	9.4	282	978	48.54	140.75	50.18	10.2	26.16	13.863	9.496	1.492	104	1.61	13	49	0	435	0	4128	206	1.2	1.518	13.836	1.261	165	31	211	1.91	48.5	11.7	214	706	189	10.42
35134	2	1	21	4	0.37		2	2	2		2	1	2	1	1.9	7.4	178	3382	107.62	445.69	194.44	21.1	131.88	50.905	50.368	18.352	308	8.59	763	843	59	942	20	14485	617	3.865	3.229	47.771	3.492	1028	848	379.2	10.16	34.1	118.9	902	1360	340	25.98
35135	1	1	33	3	1.3		2	2	2		2	1	2	1	1.7	4.3	267	2223	88.41	185.05	29.11	7.6	90.44	27.733	27.743	25.606	201	5.25	168	201	44	374	6	7278	332	1.516	2.174	28.084	1.904	373	199	339.8	6.28	24.7	38.6	818	1333	221	14.87
35138	1	2	29	4	2.71	1	2	2	2		2	2	2	1	1.6	9.3	254	2167	86.58	334.91	148.66	14.2	46.59	16.32	16.428	8.427	166	7.57	159	507	33	3818	679	6805	6819	1.552	1.591	28.813	2.741	459	164	355.5	4.06	434.3	300.2	755	1056	298	16.54
35142	1	1	81	4	2.27		2	2	2					1	1.6	4.1	203	2173	82.2	246.17	115.73	19.4	84.13	30.468	29.118	18.134	204	5.12	911	2216	5443	12762	324	2	1308	1.98	3.053	25.123	1.832	371	162	305.4	6.74	81.3	126.6	1773	1917	346	29.24
35143	1	1	71	3	4.37		2	2	2					1	1.9	3.8	191	2601	121.13	162.53	20.16	9.2	115.07	33.289	39.489	30.091	1326	11.27	516	633	366	1225	21	0	1454	2.08	3.155	23.694	1.826	575	357	914.2	5.91	32.3	110.3	424	1597	289	14.85
35144	1	1	66	1	0.62		1	2	2					1	2.4	4.5	245	2051	72.86	218.1	48.03	16.3	56.12	17.965	21.73	11.138	158	3.44	6	22	18	185	3	3113	159	0.865	1.303	19.306	1.708	247	39	365.4	4.54	19	24.4	357	1220	319	12.08
35146	2	2	85	4	2.57		1	2	2					2	1.4	2.7	128	1510	56.91	199.98	95.25	8.8	56.14	26.577	17.421	7.368	139	1.92	861	873	13	130	11	257	170	0.997	2.047	15.259	1.246	203	93	208.8	3.7	7.6	18	1059	1344	207	10.65
35149	1	2	29	3	3.49	2	2	2	2		2	1	2	2	2.5	3.6	228	1388	76.95	185.96	120.66	9	38.59	10.018	15.366	9.46	220	4.49	119	224	259	1109	28	290	453	0.611	0.69	26.967	1.811	148	56	285.3	2.52	23.7	59.6	261	844	158	7.33
35151	2	2	81	3	1.95		1	2	2					2	1.7	3.7	177	1579	63.03	183.42	77.25	14.3	70.53	29.581	25.267	10.898	153	3.22	332	425	204	984	55	433	271	1.443	1.62	13.872	0.731	251	76	207.2	2.77	26.6	57.2	901	1038	220	9.93
35154	1	2	23	4	0.77	2	2	2	2		2	1	2	2	2.1	4.6	406	1372	50.92	173.91	98.18	6.9	53.73	18.924	24.902	5.387	137	1.9	69	96	5	308	9	3	343	0.505	0.548	10.174	0.781	159	60	146.1	3.8	3.3	35.1	457	744	135	8.15
35155	1	2	41	5	5	2					2			2	2.7	4.2	349	791	70.79	49.39	14.97	2.5	33.86	10.925	11.46	6.102	243	3.92	256	265	0	113	2	614	28	0.207	0.44	4.71	0.631	52	0	236.9	6.94	8.2	20	806	1193	200	2.53
35157	2	1	46	5	0		1	2	2		2	2	2	2	2.6	4.7	286	1293	54.93	167.61	78.05	12.3	46.92	15.267	18.133	10.813	159	4.18	73	193	37	1433	5	3301	1532	1.064	1.398	13.021	0.982	359	119	224.4	4.26	98.9	216.2	619	850	183	13.06
35159	2	2	25	4	3.12	1	1	2	2		2	1	2	2	1.9	4.5	255	1727	42.53	197.67	21.23	10.6	85.45	17.42	22.931	37.285	496	6.9	318	364	56	453	144	0	861	1.409	1.161	10.501	1.544	407	287	317.7	2.11	18.2	96.9	216	585	141	8.83
35161	2	2	62	1	0.86		1	2	2					2	3.3	3.4	302	1370	62.75	218.9	97.59	28.3	33.5	6.855	14.553	9.108	289	9.56	554	601	100	480	94	1908	413	1.227	2.096	9.835	1.665	316	110	308.7	5.07	64.7	16.6	1097	1571	387	13.54
35162	1	2	25	2	2.18	2	2	2	2		2	1	2	1	3	8.4	351	3027	89.58	246.15	127.13	20.9	189.8	51.317	68.437	59.788	250	14.58	360	398	39	417	31	742	287	1.032	1.093	17.288	1.328	340	117	203.5	1.24	164.4	148.9	1106	1073	198	11.9
35163	1	1	36	4	5		2	2	2		2	1	1	2	2.4	3.3	214	2193	130.18	193.24	128.27	17.5	103.93	22.86	33.057	37.596	490	13.82	639	774	58	1530	144	3246	2283	3.323	2.323	35.621	2.336	452	85	591.2	18.06	47	194.2	1223	1710	394	11.76
35165		2	85	4	1.22		1	2	2					2	2.5	2.8	211	1749	64.3	249.75	113.89	14	58.02	21.874	21.42	9.578	182	6.33	632	802	52	2009	27	447	2196	1.899	2.034	16.181	2.149	350	125	287.9	2.8	143.4	220.2	780	1136	298	9.24
35169	1	1	25	1			1	2	2		2	1	2	1	2.6	4.3	263	2837	94.27	370.05	185.96	13.3	110.56	34.871	44.479	25.329	242	4.34	162	196	3	417	6	5012	307	1.64	3.056	48.918	3.871	316	192	257.3	10.9	9.7	74.4	816	1287	209	15.9
35171	1	1	44	5	5		2	2	2		2	1	2	1	2.7	2.2	334	1422	124.88	80.62	38.88	5.9	65.7	15.534	19.417	23.768	190	10.44	284	326	55	472	2	1321	365	2.08	2.774	58.989	2.287	261	58	332.7	10.28	70.5	87.3	611	1376	312	13.56
35172	1	2	35	5	4.68	1	1	2	2		2	2	2	1	1.5	6.8	200	1643	58.17	201.59	85.72	20.6	62.46	18.481	23.329	15.623	94	8.65	206	587	28	4364	363	3813	8504	1.074	1.755	15.762	1.71	515	72	230.1	2	189.2	463.3	1249	1109	350	10.51
35174	1	1	29	5	3.11		2	2	2		2	2	2	1	2.2	3.3	394	2784	79.4	395.6	288.38	14.2	104.22	38.663	34.232	18.312	177	10.5	551	588	43	399	20	981	301	1.558	2.425	26.149	1.511	523	128	285.5	6.82	75	159.1	882	1236	419	17.03
35175	1	2	85	5	2.41		1	2	2					2	2.8	4.4	314	1368	43.75	180.72	92.35	10.7	54.95	29.187	15.276	5.517	319	3.3	461	529	22	508	669	13721	877	1.034	1.412	11.466	0.975	224	42	244.9	1.77	171.7	14.3	1121	794	227	10.46
35178	2	1	69	5	5		2	2	2					1	1.8	2.8	198	2390	104.81	310.32	85.62	33.9	85.46	21.972	33.359	22.491	282	7.32	634	919	68	3264	195	515	1318	2.636	2.455	28.998	3.318	688	168	503	12.12	137.8	139.7	1096	2011	591	20.98
35180	2	2	33	2	3.85	2	2	2	2		2	1	1	1	1.9	3.7	263	1394	31.02	206.37	105.24	16.9	51.15	15.387	22.509	7.878	40	6.72	26	71	0	543	0	38192	24	0.754	0.571	11.462	0.607	205	123	81.4	1.16	20.1	23.4	140	465	134	8.53
35181		2	66	4	2.55		1	2	2					1	2.8	4.3	354	1784	66.48	220	90.7	21.6	73.54	22.358	33.645	17.59	51	13.76	169	214	0	543	0	24839	251	6.35	3.331	50.301	2.79	802	522	222.2	7.01	117.6	16.6	1212	1496	564	20.08
35183	2	2	28	3	1.15	2	2	2	2		2	1	1	1	3.6	5.5	273	1296	31.55	232.07	104.98	5.7	28.31	11.998	9.77	5.071	28	5.53	312	316	1	49	0	0	48	1.229	1.408	12.305	1.529	504	431	116.5	4.98	14.7	11.7	408	464	109	12.87
35184	2	2	21	3	1.19	1	1	2	2		2	1	2	2	1.8	5.2	260	1647	72.5	143.13	53.98	12.4	91.41	36.723	35.62	14.194	203	2.23	214	228	6	162	35	0	771	1.035	1.531	16.046	1.154	230	66	220.5	4.31	15	25.2	1007	1118	207	8.59
35185	2	1	81	2	2.58		1	2	2					1	2.1	5	116	1614	51.89	247.93	129.99	23	54.35	16.424	17.452	13.107	122	6.13	658	722	189	354	684	3423	724	2.337	3.347	30.353	2.978	525	420	189.5	9.29	50.5	13.1	756	1169	315	28.73
35186	1	1	45	3	3.36		2	2	2		2	1	2	2	2.3	6.1	302	2230	48.1	369.29	229.25	8.6	63.5	20.415	30.079	10.04	105	1.24	7	11	9	38	10	7	197	1.208	0.935	19.734	1.318	194	94	141.8	3.38	72.3	27.1	361	740	142	11.55
35188	1	1	33	3	0.8		2	2	2		2	1	1	1	4.4	5.2	366	2243	118.97	260.82	116.78	6.4	47.02	12.934	23.032	5.084	282	5.19	17	46	2	310	41	4880	218	1.358	1.52	39.783	2.278	411	254	563.5	6.58	119.7	13.6	345	1379	267	16.52
35190	1	1	54	5	3.79		2	2	2					1	1.8	2.8	233	2558	81.68	379.98	240.7	32.3	51.71	9.746	19.07	18.66	26	17.17	250	530	1013	2837	119	3276	1015	8.208	4.323	48.39	3.95	825	404	363	7.51	358.6	63.6	1508	1830	782	20.06
35191	2	2	30	4	2.57	2	1	2	2		2	1	2	2	2.3	4.5	264	1842	117.47	146.18	89.62	5.5	88.87	40.306	32.019	6.954	360	3.16	457	575	43	1273	243	16477	104	0.975	2.662	16.537	1.675	86	0	414.7	8.99	35	28	1751	2173	319	9.36
35198	1	2	61	3	5		2	2	2					2	3.4	3.8	329	2114	69.36	250.79	99.38	20	68.3	20.602	23.652	18.322	323	7.55	416	858	388	4959	299	4609	7473	1.542	2.271	15.973	1.734	472	163	328.1	3.68	184.2	334.4	1103	1537	309	14.15
35202	2	2	48	4	1.84	2	1	2	2		2	1	2	2	2.3	1.3	247	1195	28.26	216.38	129.34	1.9	24.57	9.631	7.59	5.941	94	1.91	119	121	0	25	6	0	23	0.646	0.57	6.664	0.412	204	149	86.9	3.3	36.7	12.1	281	475	123	5.15
35203	2	2	72	3	2.55		1	2	2					2	1.6	3.1	272	1325	49.14	193.54	94.05	14.5	42.22	13.23	16.208	8.554	254	4.04	642	667	13	133	257	0	755	1.64	2.232	17.201	1.866	511	253	263.1	6.38	87.5	56.6	702	983	243	19.1
35205	1	2	32	1	0.98	1	1	2	2		2	1	2	2	2.1	5.4	204	1658	54.06	261.56	130.27	21	46.91	17.304	16.954	8.791	273	3.16	192	225	25	260	245	289	521	1.25	1.588	9.479	1.118	304	103	249.7	3.25	107.9	19.6	898	1277	267	10.56
35208	2	1	56	3	3.79		2	2	2					1	2	4.1	150	1127	47.32	185.45	87.7	18.8	26.92	11.559	7.82	4.721	80	5.15	338	1639	5232	12948	55	2169	2879	1.629	2.237	14.466	1.877	327	168	149.8	3.63	93	143.5	712	961	234	13.66
35211	1	1	40	4	4.97		1	2	2		2	1	2	1	3.1	2.6	307	1506	82.71	202.14	120.29	15.2	44.12	10.572	13.28	17.601	172	7.85	118	315	113	1644	1306	1029	2398	1.294	1.655	24.722	1.931	487	52	318.5	5.14	442.3	223.2	376	1038	294	11.3
35213	1	1	42	5	5		1	2	2		2	2	2	2	3	4.7	244	2151	85.73	270.79	154.17	9.2	83.27	25.173	29.285	21.999	227	4.5	194	300	338	1081	50	2674	390	1.05	1.111	29.244	1.665	280	169	261.5	5.36	30.1	108.2	728	954	212	14.5
35214	1	1	50	4	0.71		2	2	2					1	1.7	4.2	347	1443	32.49	238.01	129.15	9.3	42.43	10.401	14.882	14.2	259	4.18	661	729	24	797	29	3	1303	1.038	1.945	11.95	1.073	380	111	227.9	3.07	38.1	78.1	283	547	192	8.26
35215	2	2	52	1	3.1	2	1	2	2					1	1.6	5.6	250	2247	52.48	294.95	187.09	11.9	73.65	20.736	26.576	20.595	498	6.61	317	606	220	3305	33	6875	996	0.862	1.448	10.451	1.333	265	108	335.9	2.39	73.4	72.2	809	1173	208	10.58
35216	2	2	71	2	1.53		2	2	2					2	2.4	6.6	303	850	26.59	101.52	40.08	6.6	40.64	11.824	13.103	12.467	112	2.54	82	84	0	26	1	0	87	0.389	0.511	7.152	0.411	102	41	137.2	1.72	22.4	50.7	213	439	86	5.1
35218	1	2	37	4	5	2	2	2	2		2	2	2	2	2.6	7.5	401	3482	122.9	423.54	213.71	15.4	145.09	40.81	62.224	30.777	644	7.83	428	456	18	319	12	4069	361	1.919	2.325	34.383	2.311	323	182	409.1	3.11	35.6	69.5	681	1864	266	17.33
35221	2	2	61	1	0.65		1	2	2					2	2.7	3.3	280	907	38.62	131.05	83.3	6.9	27.62	11.263	7.631	6.535	70	2.47	476	687	703	1994	396	760	714	1.057	2.201	12.115	1.723	242	81	189.4	4.91	113.2	42	1287	947	180	8.31
35222	1	1	24	4	3.11		2	2	2		2	2	2	2	2.7	3.3	205	3223	272.11	258.79	115.84	29.6	124.17	33.052	46.034	34.822	501	33.31	1527	2931	5877	13892	47	0	2626	3.436	4.393	85.342	7.192	635	62	664.2	10.5	166.5	195.3	1675	2853	772	31.07
35224	1	2	20	4	0.31	2	2	2	2		2	2	2	2	2.1	2.1	416	1690	47.37	186.71	98.21	6.9	76.56	28.957	26.366	13.481	655	3.98	606	650	70	492	12	1784	542	0.926	2.065	9.694	0.936	186	75	444.8	2.7	12.5	45	667	1184	147	7.5
35225	1	1	48	5	3.98		2	2	2		2	1	2	2	3.4	2.4	215	3546	151.25	351.55	158.67	13.8	172.44	48.037	68.828	41.186	730	17.83	634	713	16	689	493	18516	1014	2.266	2.502	48.28	2.142	471	193	562.2	4.66	128.8	79.6	1203	1894	343	21.12
35228	1	1	36	5	3.25		2	2	2		2	2	2	1	2	3.8	257	2818	99	402.56	143.55	22.9	94.46	29.513	32.258	24.397	227	6.51	208	475	1002	2570	243	3567	2079	1.927	2.222	26.737	1.747	491	229	300	1.99	105.9	47	923	1439	427	23.13
35232	2	2	67	3	1.95		1	2	2	2				2	3	3.9	287	1348	45.58	123.37	38.97	11.7	76.96	20.111	28.561	22.811	485	7.68	438	509	90	756	136	4207	971	0.881	1.604	12.106	1.34	257	40	330.5	2.37	121.4	60.1	549	800	184	7.87
35233	2	1	47	3	4		1	2	2		2	1	1	2	1.6	3.6	239	1262	57.81	161.09	105.79	5.7	43.35	14.794	15.527	9.206	168	1.48	83	85	0	24	0	0	33	0.5	0.657	18.404	1.007	94	46	143.2	1.1	1.7	16.6	240	560	112	4.96
35235	2	2	82	3			1	2	2					2	2.7	7.6	378	680	16.74	97.72	40.32	8.2	27.48	6.722	12.969	6.176	15	3.55	75	209	372	1049	794	1475	426	0.594	0.522	6.346	0.301	129	62	57.6	0.21	67.7	18	213	245	72	4.39
35237	1	1	67	4	0.89		1	2	2					1	2.7	10.4	249	5132	229.42	583.47	303.1	36.2	194.23	84.125	68.245	21.432	660	18.4	1735	1992	147	2146	1773	46083	2209	5.395	9.268	76.451	6.375	1958	1262	987.4	24.95	460	67.4	3223	3860	894	71.4
35238	2	2	51	4	5	2	2	2	2					2	1.4	3.5	166	2242	62.93	336.32	142.37	23.4	77.18	23.973	30.692	12.656	124	9.15	202	258	71	626	40	12946	749	1.407	1.621	17.302	1.197	425	169	131.7	1.25	109.6	68.4	1104	1106	315	15.24
35241	1	2	30	2	0.44	2	1	2	2		2	1	2	1	2.1	9.5	296	1024	37.28	187.88	88.31	18	17.34	4.562	7.381	3.781	72	3.76	0	615	2423	6075	184	4152	1770	0.632	0.548	10.42	1.243	151	34	157.6	1.42	159.9	97.4	388	759	212	8.2
35247	1	2	34	5	3.9	2	2	2	2		2	1	2	1	2.8	6.6	235	1414	99.6	101.79	46.11	9.9	67.98	29.016	22.801	6.817	272	6.12	253	320	19	801	32	26763	241	0.84	2.006	32.674	1.205	198	100	305.3	7.57	25.3	56.8	952	1373	363	12.93
35248	1	1	37	4	3.42		2	2	2		2	1	2	2	1.2	1.8	277	1918	69.57	224.94	102	13	65.83	23.297	26.939	9.126	241	3.79	128	758	85	7534	15	10540	224	0.811	3.434	49.848	5.335	229	60	307.9	11.99	45.8	40.2	820	911	286	9.56
35255	1	2	45	4	1.81	2	1	2	2		2	1	1	2	1.7	1.9	268	1834	77.52	198.63	68.31	18.9	83.39	22.146	25.095	28.625	228	5.19	278	440	70	1858	130	2906	1992	1.42	1.574	20.668	1.111	314	125	261.3	2.04	147.3	37.5	720	1235	263	11.39
35257	1	2	21	4	0.94	2	2	2	2		2	2	2	2	2.1	3.7	253	3270	116.82	427.7	247.64	18.1	128.34	51.289	42.029	19.818	233	11.55	130	154	2	244	77	9644	406	1.579	4.34	75.962	5.909	433	123	359.7	13.66	136.8	33	936	1558	456	16.38
35260	2	2	74	1	1.19		2	2	2					2	1	3.3	287	1072	49.93	105.76	9.77	6.1	49.84	16.54	18.202	10.494	230	2.05	137	145	9	89	7	186	249	1.576	1.49	12.608	0.707	194	120	192.5	1.45	5.6	11.4	616	832	128	8.49
35261	9	2	24	2	0.23	2	2	2	2		2	2	2	1	2.1	8.5	371	2117	68.41	231.22	144.78	7.8	65.91	20.886	27.217	11.661	529	5.38	412	448	211	313	41	0	933	0.797	1.508	13.159	1.466	163	44	380.7	2.73	31.5	87.2	571	1510	144	10.51
35263	2	2	27	2	1.55	2	2	2	2		2	2	1	2	1.5	3.4	438	2677	86.02	372.6	180.11	17.5	96.35	49.433	31.5	7.701	267	3.65	814	837	14	277	41	403	308	2.475	3.368	28.168	3.147	630	388	219.4	10.4	60.4	28.7	1246	1368	246	31.06
35265	1	2	33	5	5	1	2	2	2		2	2	2	2	1.6	7.2	264	2869	128.6	364.84	250.19	16	99.43	51.053	33.947	9.162	590	6.36	1520	1620	94	990	378	9549	991	2.459	5.458	31.392	3.252	769	508	593.3	14.62	174.8	75.9	2904	2784	455	31.97
35266		1	34	5	3.25		2	2	2		2	1	2	2	3.1	4.9	334	4056	184.37	420.2	150.76	33.1	184.62	54.671	76.865	37.108	1407	13.54	997	1125	140	1457	41	25204	1301	2.075	3.781	40.017	3.817	596	151	1004.9	8.21	71.6	115.5	1327	2583	540	26.78
35268	1	1	39	3	2.93		1	2	2		2	1	2	1	3.3	7.3	246	2326	50.56	408.49	252.12	8.8	59.16	20.405	21.403	11.546	80	4.39	92	120	7	329	4	13051	262	1.384	1.293	13.827	0.502	272	183	91.1	1.41	36.6	29.2	678	984	108	14.21
35273	1	1	79	1	1.59		2	2	2					2	1.9	2.8	188	1909	108.59	228.03	90.82	32.7	65.5	23.87	27.917	8.049	190	5.61	1545	1654	166	1188	66	17228	2066	2.527	3.938	28.106	3.024	236	21	382.7	8.1	75.4	56.2	1796	2136	441	17.45
35278		2	29	3	3.36	2	1	2	2		2	1	2	2	2.1	4.2	316	2000	125.11	127.61	51.85	12.6	115.53	33.79	38.872	35.748	525	4.28	455	599	263	1611	13	553	1078	1.415	2.127	23.588	1.427	276	52	444.6	3.18	63.5	130.5	1106	2607	787	26.35
35280	2	1	23	2	2.1		2	2	2		2	1	2	2	1.5	8.2	282	647	58.37	69.3	8.77	10.4	14.19	5.122	4.278	2.749	172	1.28	63	402	1533	3306	0	0	1009	0.481	0.647	15.097	1.478	66	0	203.5	0.59	33.9	44.4	161	517	150	4.37
35284	2	1	54	1	1		2	2	2					2	1.2	2.7	233	2455	79.56	273.75	119.37	14.2	119.04	36.525	50.916	22.809	380	5.55	228	258	1	277	34	466	245	1.579	1.71	19.554	1.135	273	157	353.1	4.81	238.6	47.5	664	1711	193	17.47
35287	1	2	45	4	1.37	2	2	2	2		2	1	1	2	1	5.4	373	1826	42.29	275.26	168.84	11	65.46	23.938	24.303	11.632	126	2.24	799	810	3	122	8	835	76	1.411	1.577	18.063	1.219	311	225	138.2	2.02	2.5	29.4	753	1002	199	19.5
35297	1	2	28	3	2.27	2	2	2	2		2	2	1	1	3.2	4.9	267	4022	129.62	531.31	300.88	14.6	158.14	53.107	62.733	29.368	675	6.33	501	530	0	329	9	9694	405	2.203	2.648	30.095	1.902	469	254	457.4	4.01	75.5	51.1	1015	1755	281	20.97
35298	1	2	52	4	3.35	2	2	2	2					2	3.2	5.5	345	1808	89.76	157.43	87.41	14.4	94.7	46.206	33.089	12.328	772	6.43	592	632	12	436	97	2106	698	1.514	1.93	11.157	0.938	193	46	520.7	5.7	23.3	26.8	1230	1501	290	9.44
35299	1	1	48	4	2.83		2	2	2		2	1	1	1	1.2	3.1	206	2522	125.9	239.75	116.25	14	102.83	35.462	41.369	14.809	328	6.88	243	1329	4179	10923	25	1760	1194	1.472	2.076	35.183	3.024	341	123	474.7	6.49	83.1	186.7	459	1205	250	15.22
35301	1	2	80	4	4.7		1	2	2					2	1.2	1.1	214	1744	68.41	214.65	135.05	20	74.93	21.474	26.003	23.222	191	10.45	242	469	144	2385	551	2439	4561	0.948	1.639	17.048	1.494	324	27	269.5	10.98	192	203.2	1065	1338	365	11.75
35302		1	24	1	2.07		1	2	2		2	1	2	1	2.4	4.5	191	4076	84.38	373.44	4.43	18.3	34.88	10.505	12.783	8.139	100	1.97	4	9	10	54	3	250	20	1.012	2.326	44.444	4.072	560	11	883.6	4.26	1.5	13	534	1932	649	9.69
35305		1	39	1	1.08		1	2	2		2	1	2	1	1.9	5.5	322	3083	133	247.45	36.22	14.1	117.71	30.215	56.333	21.379	737	4.62	182	206	29	207	175	386	554	1.74	2.339	39.98	2.611	422	183	677.2	5.53	78.3	53.4	595	1493	295	16.93
35306	2	1	78	2			1	2	2					1	1.2	7.3	295	1402	52.48	182.76	110.85	10.6	53.82	19.31	23.602	6.975	100	5.09	172	211	2	466	3	2747	630	0.774	1.602	13.687	0.995	181	73	208.8	3.83	19.4	38.5	583	778	204	8.49
35308		2	22	3	1.93	2	2	2	2		2	1	2	1	3.4	5.8	406	1032	31.16	120.48	19.05	7.4	49.21	10.023	14.804	19.823	233	3.49	107	134	33	260	80	553	443	1.149	1.206	7.346	0.593	229	137	179.4	0.92	8.3	49.4	474	741	170	8.01
35311	1	2	72	3	2.09		1	2	2					1	1.6	3.6	275	2282	101.27	208.1	82.78	25.2	123.18	24.486	38.383	51.721	159	31.76	587	1458	2195	9170	143	0	5557	2.708	3.626	72.395	5.052	750	546	256.6	14.13	65.5	120.1	571	1153	351	34.97
35312		1	52	3	1.52		1	2	2					2	3	4.2	208	2555	99.63	323.46	72.61	34.5	89.44	37.577	29.304	14.065	251	7.01	870	957	104	902	177	4274	3181	1.677	2.338	37.328	3.44	506	258	386.7	4.45	101.5	72.8	683	1500	464	23.58
35313	1	2	76	1	2.29		1	2	2					1	2.8	6.1	334	864	26.97	161.3	81.98	14.1	15.19	5.231	5.964	2.665	20	2.21	451	473	37	135	243	0	488	1.613	3.855	18.593	2.136	541	287	190.2	4.7	114.9	14	748	678	289	24.5
35315	2	2	60	5	2.34		2	2	2					2	2.8	4.3	358	1161	46.37	190.02	107.69	16.5	28.38	10.134	9.87	5.766	98	5.07	321	447	80	1094	750	0	2206	0.946	1.528	11.735	1.928	257	19	211.6	2.12	256.5	146.3	1333	870	254	7.06
35318		2	32	5	3.11	1	2	2	2		2	1	2	2	1.9	7.3	259	2579	95.86	358.18	190.11	15.7	88.54	39.555	29.192	12.41	474	6.42	1040	1467	1364	3919	1052	7186	1821	3.245	4.599	26.018	3.797	712	389	455.3	10.86	293.8	62.1	2619	1895	360	27.98
35321	1	2	29	4	5	2	2	2	2		2	1	2	1	2.9	5.6	356	1073	39.82	109.17	48.53	11.2	57.97	15.884	18.224	18.152	79	8.44	137	409	97	3203	13	2329	3158	0.741	1.381	15.248	1.206	328	84	121.6	2.47	28.7	245.8	642	703	256	17.02
35322	2	1	28	3	0.85		1	2	2		2	1	2	1	2.6	6.3	322	3314	153.9	430	192.21	37.2	113.19	30.949	42.873	27.684	1027	13.12	420	473	26	458	337	6528	1270	1.608	3.803	58.931	5.065	517	109	760	7.42	121.2	67.4	1174	2096	564	28.03
35324	1	1	76	3	1.36		2	2	2					1	1.6	7.2	290	672	32.39	64.23	31.87	4.5	31.99	11.29	10.21	6.581	96	3.07	84	134	51	461	231	1035	453	0.608	1.506	10.409	0.74	163	36	151.9	2.49	69.9	47.1	284	403	140	5.38
35325	1	2	35	2	1.61	3	1	2	2		2	1	2	2	1.8	3.5	279	1754	77.63	284.79	89.58	25.8	36.23	11.384	11.421	10.43	134	4.59	262	989	2732	7110	533	4820	1731	1.321	1.988	25.704	2.799	274	57	307.3	2.24	211.2	68.3	918	1679	412	12.52
35329	1	1	55	4	5		2	2	2					1	2	5.1	299	2454	129.1	229.07	61.8	10	94.26	43.083	29.174	13.367	738	5.84	874	893	1	252	10	1518	419	2.4	4.047	35.923	2.241	490	267	631.7	6.26	2.8	30.4	1550	1951	350	14.22
35330	1	1	21	3	2.61		2	2	2		2	2	2	1	2.3	3.3	234	4573	123.46	487.99	249.4	7.8	109.09	41.932	40.927	19.704	344	2.83	122	150	15	272	8	2237	213	1.53	2.578	42.771	3.1	459	138	764.6	11.24	5	80	874	1775	404	22.95
35331	1	1	34	2	4.25		2	2	2		2	1	2	1	1.6	4.2	206	1271	72.62	145.69	56.03	14.8	46.69	16.234	14.046	11.524	267	6.47	522	563	26	488	2	18445	205	1.655	3.122	32.155	2.104	347	250	237.4	5.65	8.2	38.9	695	1121	283	15.63
35336	1	2	22	1		1	1	2	2		2	1	2	2	1.2	5.5	300	2623	98.91	361.97	185.65	16.6	91.5	30.746	27.979	26.661	237	6.2	1027	1052	113	287	28	0	800	2.458	4.849	34.7	4.41	591	336	380	11.73	50.5	47.3	1854	1784	343	24.26
35337	1	1	41	1	0.96		1	2	2		2	1	2	1	2.6	5.7	327	2267	64.44	442.71	262.51	27.7	34.08	13.136	9.605	6.052	404	6.34	856	887	10	381	6	9283	124	2.311	3.277	28.771	2.603	554	457	272.9	7.94	61.3	23.6	1054	1997	364	33.55
35339		2	41	3	1.46	2	1	2	2		2	1	1	2	3.3	2.9	476	2412	105.03	283.12	105.44	26.6	100.38	29.562	41.984	18.745	393	22.59	215	565	811	3745	98	51391	842	2.635	2.414	28.926	2.527	496	177	471	5.18	146.4	59.4	919	1745	424	23.31
35341	2	2	81	5	5		2	2	2					2	1.6	3.8	273	1064	35.54	150.14	63.24	15	40.26	12.611	16.247	8.874	63	4.05	230	459	676	2405	27	0	1103	1.089	1.533	11.226	1.379	391	232	135.6	2.02	89.3	62.6	537	631	180	12.85
35342	1	1	30	3	4.18		1	2	2		2	1	2	2	2.9	2.2	273	5695	297.08	582.29	476.59	15.1	153.44	55.876	59.875	17.677	1149	8.7	357	693	152	2892	2047	1753	6023	3.176	3.714	63.101	4.832	568	61	1338.6	18.46	545.7	102.7	1221	3109	527	38.58
35343	1	2	36	5	3.82	1	1	2	2		2	1	1	1	2	5.1	180	2932	65.15	542	322.8	24.2	61.73	16.872	24.568	14.904	490	9.31	449	807	536	3823	414	10512	863	1.452	2.103	19.711	1.991	355	84	459	2.7	154.8	51.4	1087	1455	361	14.41
35344	2	2	31	4	0.97	2	2	2	2		2	2	2	1	3.5	4.8	351	2157	95.92	307.27	186.34	12.6	62.63	18.73	22.813	16.433	223	5.9	487	650	387	1651	244	1169	1063	1.725	2.696	34.845	2.978	647	451	369.3	3.73	157	101	1374	1599	338	21.62
35345	1	1	48	4	4.55		1	2	2		2	1	2	1	2	2.8	259	1803	51.55	304.95	172.02	22.2	47.25	12.268	21.019	10.501	86	11.7	355	404	78	429	305	2565	442	1.894	1.63	21.062	3.661	817	508	173.2	7.66	340	17.8	877	936	334	17.95
35348	1	1	30	2	1.63		2	2	2		2	2	2	1	2.1	4.6	206	2972	78.7	407.4	220.73	13.9	118.08	38.192	46.946	23.519	187	6.16	617	664	58	368	167	4162	1506	2.458	3.517	31.72	2.679	584	363	287.6	9.96	33.2	51	1534	1548	246	25.05
35349	1	2	63	3	4.82		1	2	2					1	2.4	3.2	210	2032	61.82	258.04	121.88	11.7	84.86	32.512	34.331	11.043	186	5.54	306	318	7	143	18	0	167	1.355	2.682	16.706	1.903	373	251	244.6	6.93	20.1	33.9	1042	1231	243	14.47
35352	2	2	85	4	0.78		1	2	2					1	1.1	2.5	175	515	18.55	64.48	31.64	5.4	21.64	6.341	8.858	4.874	30	2.16	99	247	498	1430	195	2213	736	0.533	0.675	6.563	0.662	91	18	76.1	0.7	55.6	48	258	356	88	4.19
35353	1	1	73	5	1.33		2	2	2					1	2	3.9	88	2187	84.28	268.31	122.81	19.8	84.53	33.925	27.934	14.072	666	7.62	506	749	488	2575	235	35775	1219	2.508	2.653	24.584	2.055	435	81	610.9	2.39	210.6	55.7	619	1169	284	17.56
35364	2	1	26	1	0.8		1	2	2		2	1	2	2	2	5	313	1654	51.9	287.04	112.61	14.8	34.76	10.494	12.364	8.343	97	2.3	86	112	42	293	4	1864	158	0.951	1.029	13.939	1.151	216	149	158.2	3.14	17.2	19.2	515	1083	252	10.09
35367	1	1	57	5	5		2	2	2	2				1	1.6	3	232	2558	111.45	350.76	109.55	22.7	69.05	18.182	24.009	20.088	482	10.14	267	327	28	591	264	16881	857	2.448	2.251	39.675	2.204	717	424	420	2.17	152.3	85.3	649	1446	329	20.14
35372	2	1	38	4	5		2	2	2	2	2	1	2	2	1.9	3.9	246	2907	85.46	400.04	239.88	17.7	113.22	42.023	39.012	25.693	238	7.91	439	501	25	704	85	7970	309	2.078	2.495	25.841	1.952	392	195	305	5.25	106.1	42.1	1354	1673	358	21.99
35374	2	1	72	5	3.59		2	2	2					2	0.9	3.6	159	1373	63.01	167.77	80.99	14.7	52.83	11.153	21.431	16.048	91	6.86	29	124	211	662	762	1029	1349	0.948	1.029	19.786	1.564	318	72	259.4	2.04	296.9	93.3	521	659	338	12.51
35375	1	2	65	4	1.56		1	2	2					1	2.8	3	270	2206	122.23	204.26	104.41	9.8	99.89	43.266	32.277	16.17	460	5.76	1270	1312	49	520	8	3	791	1.73	4.651	21.628	1.441	364	119	527.9	11.4	35.4	63	2639	2598	368	10.56
35376	1	2	28	4	5	1	2	2	2		2	2	1	2	1.4	10	231	2566	162.38	263.46	145.62	15.9	97.42	36.686	34.572	15.572	357	9.5	771	1101	904	3127	823	4334	1713	1.852	3.191	43.806	4.698	333	59	680.2	12.55	257.6	122.1	2129	2316	378	18.84
35377	1	2	22	3	2.09	1	2	2	2		2	2	2	2	1.9	4.6	351	1778	78.48	204.78	106.7	6.8	71.07	31.523	22.962	9.778	206	3	258	647	1460	3724	371	729	967	1.434	2.098	13.163	1.118	288	132	216.4	4.84	114.1	67.7	1601	1355	192	10.9
35381	1	1	22	4	0.61		2	2	2		2	2	2	1	1.7	3	255	7261	411.85	702.26	271.05	46.8	286.05	101.692	116.866	43.436	1100	19.94	592	690	3	1170	4	27111	82	7.404	5.613	120.751	10.188	656	150	1301	42.55	80	107.8	1685	4534	835	42.68
35384	2	2	71	1	2.33		1	2	2					2	0.7	7	278	1193	84.98	127.18	41.23	13.8	39.04	13.258	13.539	6.872	214	2.81	56	90	38	262	272	2521	1172	0.938	1.044	25.515	1.753	217	52	338.6	4.66	63.5	17.9	487	1011	212	9
35385	2	2	66	5			2	2	2					1	1.3	3.6	329	2727	124.85	282.47	82.17	22.5	125.82	56.522	40.04	18.428	376	7.44	775	1120	8	4140	49	0	6878	1.768	2.905	42.079	2.614	558	208	391.3	5.53	70.9	346.4	1332	1852	467	20.55
35391	1	1	28	1	1.75		1	2	2		2	1	2	2	4	6	367	1237	65.95	162.76	74.01	18.8	28.95	6.399	9.619	9.856	138	4.68	35	86	26	562	90	507	500	0.859	0.681	16.284	1.497	277	60	259.7	2.48	46.5	89.6	213	838	192	10.66
35392	1	1	64	3	3.26		2	2	2					1	2.3	4	249	3215	106.74	343.6	143.12	29.3	161.99	48.497	53.592	44.056	496	8.18	380	2854	105	29553	193	0	1263	1.659	2.146	27.229	2.538	371	140	449.7	3.09	129	50.7	815	1496	380	15.47
35395	2	1	30	5	4.82		1	2	2		2	1	2	2	2.2	6.2	250	3204	135.45	472.06	205.37	26.1	87.26	22.9	37.49	20.128	671	30.8	805	853	3	555	14	820	987	17.673	6.359	88.915	6.924	1541	1314	631.3	21.75	241.8	66.3	2150	3023	881	36.06
35396	1	2	83	5	5		2	2	2					1	1	3	370	1235	66.36	190.48	108.54	25.6	24.64	5.74	7.251	8.613	71	6.92	550	2460	3334	21048	419	187	16243	1.513	2.387	16.164	1.94	687	209	279.8	6.26	284	721.6	1459	1374	415	16.27
35397	1	2	49	3	2.73	2	2	2	2		2	1	2	2	1.3	3.9	331	2599	87.56	261.55	153.27	10.2	136.47	53.763	42.903	29.194	316	6.76	594	761	95	1956	3	1641	2746	1.472	2.436	33.492	1.766	313	126	301.8	4.75	33.5	186.6	1523	1410	436	10.13
35399		1	31	3	5		2	2	2		2	1	2	2	1.5	2.6	220	1282	57.17	144.08	68.36	5.9	34.24	9.876	15.751	6.581	139	1.75	7	11	34	36	0	0	60	1.317	0.868	15.135	1.552	114	20	273.6	1.22	16.3	7.5	323	545	199	4.29
35402	2	2	36	2	1.04	1	1	2	2		2	1	2	2	1.8	5.3	277	2299	119.11	273.51	165.72	20	84.15	30.271	28.001	18.099	779	8.24	786	876	101	779	545	4520	960	1.271	3.084	15.362	1.834	273	68	616.9	9.22	149.1	39	2494	2176	437	14.42
35403	1	2	35	5	5	1	2	2	2		2	1	1	2	0.9	6.7	162	1665	94.95	147.87	77	23	84.24	27.394	28.509	21.547	635	13.24	674	1028	251	4007	214	3365	9981	1.088	1.798	34.466	2.239	415	4	504	3.64	77.1	264.3	775	1178	317	12.03
35407	1	1	67	2	0.94		1	2	2					2	1.4	6.4	278	3724	142.15	373.36	110.04	34.3	191.7	62.115	77.165	38.129	642	13.55	447	553	98	1003	411	10275	1687	2.86	2.372	43.946	3.148	555	172	605.4	5.15	186.8	66	922	1969	544	22.71
35408	1	1	66	2	1.03		1	2	2					1	1.9	7.4	238	4572	114.5	606.55	177.02	26.1	189.3	35.172	73.935	63.303	764	15.76	1563	1657	12	1130	37	0	1489	3.536	4.598	46.358	2.824	874	588	714.8	9.41	42	251.6	1356	2588	410	30.7
35410	1	1	42	4	1.5		2	2	2		2	1	2	2	2.3	5.3	345	4266	206.98	511.24	217.6	15.8	143.14	63.616	42.932	21.785	567	10.35	750	912	78	948	1833	4367	1634	4.142	4.264	47.054	3.846	1064	494	598.4	11.7	430.3	57.3	3859	3212	517	28.64
35412	1	1	34	5	5		2	2	2		2	2	2	1	3.5	6.2	322	4830	206.1	350.23	159.3	7.6	237.8	78.931	98.49	37.669	1317	8.77	599	627	13	328	16	262	813	5.115	5.232	54.785	3.999	510	293	1042.5	9.7	28	141.8	1124	2482	399	27.02
35413	1	1	63	5	3.98		2	2	2					1	1.2	3.6	228	3289	134.52	492.64	152.21	51.7	81.41	17.375	29.245	26.044	197	22.14	1285	2772	3605	15905	219	26267	13068	5.303	5.589	77.721	6.317	1943	1386	464.5	15.14	272.9	593.4	1693	2281	728	66.89
35414	1	2	42	5	1.4	2	2	2	2		2	2	1	2	1.7	4.8	443	1951	89.38	179.44	67.67	8.1	99.18	32.703	35.161	21.765	642	8.45	352	379	44	284	16	1029	642	1.029	1.624	24.095	1.111	260	117	406.6	4.22	7.4	35.4	631	1258	177	13.81
35416	1	1	63	5	5		2	2	2					2	1.8	5.3	397	1835	61.26	163.15	76.73	6.9	68.05	32.328	22.555	5.07	194	2.27	407	420	11	150	21	835	85	0.736	1.935	12.2	0.853	188	57	241.4	5.26	34.8	14.8	1063	1403	181	7.09
35418	2	2	29	2	0.83	1	1	2	2		2	1	2	2	2.1	8	160	1791	62.27	248.54	119.72	18.8	62.24	24.909	22.268	10.144	257	5.36	293	362	107	762	19	11065	363	1.532	1.82	12.325	1.213	371	149	250.2	2.73	146.1	37.7	1202	1239	250	10.98
35420	1	1	64	4	1.06		2	2	2					1	3.1	5	367	1644	57.72	181.18	68.36	11	78.28	25.723	28.448	16.701	363	7.12	488	529	27	485	52	4086	523	0.879	2.172	12.499	0.787	217	99	277.3	2.8	26.5	48	1036	1178	236	10.07
35423	1	1	21	4	1.04		2	2	2		2	2	2	2	1.7	7.7	274	2348	68.08	324.91	133.63	13.2	78.56	26.171	29.304	17.734	391	7.63	411	480	41	568	469	20163	710	1.954	2.097	19.77	1.5	431	190	316.1	1.93	170.5	34	1256	1277	241	15.95
35424	1	2	50	4	5	2	1	2	2					1	2.4	1.9	336	1723	15.84	290.45	141.66	19.7	61.14	10.82	19.464	27.157	177	9.44	202	213	0	122	12	0	64	0.805	1.448	7.915	0.645	218	62	96	0.73	19.4	54.3	304	549	160	4.34
35430	1	2	66	3	2.27		2	2	2					2	3.7	3.5	294	1799	69.23	245.35	153.4	10.1	60.27	23.488	18.218	14.249	198	4.82	497	551	190	534	29	8462	670	1.008	2.636	10.096	0.743	248	115	274	4.1	23.1	112.1	1386	1257	208	9.3
35432	1	1	84	4	5		2	2	2					1	2.2	5.4	381	1817	78.06	200.79	86.11	10.6	51.36	16.787	17.673	10.856	148	5.66	268	322	54	434	362	1087	496	1.791	1.921	26.706	2.295	368	202	297.6	5.1	94.1	54.6	599	1100	226	16.03
35434	2	1	71	2	2.04		1	2	2					1	1.4	1.7	179	1389	54.38	169.87	58.43	14.1	56.93	18.509	21.832	10.984	520	5.05	277	312	1	386	111	1	578	1.45	1.335	13.955	1.638	178	40	387	3.09	73.2	153.9	601	869	212	8.79
35435		1	29	5	5		2	2	2		2	2	2	1	1.9	3.1	271	3564	149.85	310.34	157.83	10.5	133.17	40.392	44.249	35.962	368	10.46	137	203	9	776	3	15683	503	1.309	1.844	43.816	3.632	375	81	727.3	7.94	47	157.8	843	1814	344	17.53
35437	1	2	66	2	1.89		1	2	2					2	1.7	4.5	252	1606	86.57	207.95	74.49	16.5	52.36	17.047	18.346	12.53	167	3.86	507	869	1060	3720	228	12486	667	1.617	2.189	25.788	1.841	590	381	314.8	5.62	46.9	62.2	816	1116	308	21.41
35438	1	1	25	5	1.28		2	2	2		2	2	2	2	1.7	3.5	222	1554	41.83	167.05	50.93	9.1	79.82	27.818	36.046	10.873	174	1.8	29	40	16	124	4	380	198	0.962	0.865	13.013	0.797	235	117	151.8	3.13	4.4	37.5	397	756	151	11.21
35439	2	2	78	3	1.04		2	2	2					2	0.8	2.3	261	1465	48.96	188.13	112.6	10.8	60.86	21.19	18.24	13.371	557	5.53	352	762	1386	4174	103	3282	1281	0.67	1.287	10.927	0.923	183	30	358.8	2	33.3	92.9	557	820	162	8.17
35441	1	1	20	2	3.32		2	2	2		2	2	2	1	2.7	2.8	392	3145	78.36	295.1	158.9	9.1	70.25	20.504	25.973	17.285	260	4.28	103	140	57	411	10	4433	420	1.255	1.642	17.402	0.813	348	172	245	5.94	75.7	24.9	1026	960	225	13.37
35442	1	1	41	4	2.09		1	2	2		1	2	1	2	2.3	1.9	223	1149	17.82	187.05	152.8	4.6	41.11	13.893	17.854	6.683	42	3.04	268	292	62	253	2	2	250	0.66	0.622	9.436	0.675	122	68	85.8	0.58	4	28.6	257	255	121	4.68
35444	1	1	80	4	2.58		2	2	2					2	1.4	4.2	266	1550	42.33	216	86.81	12.2	59.71	15.233	24.747	12.592	386	3.64	220	262	44	278	400	0	805	1.646	2.216	15.811	1.571	345	171	335.1	1.56	100.7	28.3	658	866	187	10.86
35445		2	25	2	1.2	2	2	2	2		2	1	1	2	1.9	2.1	220	3255	103.96	412.59	246.73	12	122.52	56.001	45.719	11.14	323	5.65	677	724	41	532	65	1883	434	1.874	2.204	19.509	2.124	254	100	346.9	6.3	310.9	59.7	1575	1802	308	11.98
35446		2	25	1		2	1	2	2		2	1	2	2	2.6	4.4	298	2207	64.44	334.16	168.43	18.4	72.7	29.044	26.639	13.939	153	2.45	514	547	44	381	5	3187	344	1.941	3.009	24.604	3.565	569	396	217.6	8.34	114.6	63.2	1096	1240	301	20.98
35453	2	2	35	1	1.7	1	1	2	2		2	1	2	2	1.3	4.7	235	1867	94.48	295.53	152.87	20.6	37.79	12.737	13.394	6.527	151	10.5	318	658	855	3193	951	3682	1267	1.709	2.028	30.866	4.911	683	436	376.8	10.77	341.1	25.7	1281	1341	354	21.5
35454	2	2	26	4	3.41	2	2	2	2		2	1	2	2	2.1	2.2	213	2852	106.77	383.75	235.68	12.4	105.28	48.685	38.263	9.724	458	3.25	918	943	18	279	23	2507	512	2.609	3.178	21.984	2.357	246	81	477.8	6.9	121.9	21.1	1503	1963	306	10.3
35455	2	2	53	5	1.07	2	1	2	2					1	2.1	4.7	204	763	21.65	121	62.49	3.1	22.09	9.765	6.368	3.356	42	1.37	72	78	14	78	0	117	201	0.346	0.632	6.011	0.328	76	53	61.3	0.26	2	13.7	422	373	162	4.27
35456	2	2	30	2	1.55	3	1	2	2		2	1	2	2	1.5	3.5	358	2587	120.29	272.96	107.44	27.9	114.82	29.907	38.728	37.434	610	12.6	189	314	215	1359	20	17233	668	1.38	2.576	35.205	3.837	488	116	412.5	10.37	51.5	99.3	986	1676	388	17.36
35457	2	2	23	5	0.84	2	1	2	2		2	2	2	2	3	5	274	2459	94.67	306.16	143.79	27.1	102.3	26.634	41.006	27.477	322	14.52	367	1877	6102	14692	717	694	1596	1.887	2.704	37.252	2.922	722	438	417.9	2.95	167.2	90	1396	1741	457	25.65
35458	1	1	23	4	2.45		2	2	2		2	2	1	1	2.3	3.7	188	1342	32.3	241.04	163.92	7.1	30.6	10.463	13.986	3.463	70	1.42	34	52	3	216	4	3744	176	0.579	0.43	6.845	0.514	150	80	90.5	1.89	3.3	21.9	317	601	83	7.77
35464	1	1	28	2	0.56		2	2	2		2	1	2	1	2.3	3.4	274	2222	113.53	299.03	157.87	7.9	62.6	18.266	20.769	17.876	375	3.97	553	636	308	831	14	2780	656	2.896	2.659	43.551	3.448	685	554	351.2	6.23	150	93	1116	1379	263	29.98
35465		1	70	3	5		2	2	2					1	2.1	3.4	169	2790	78.41	387.61	203.98	11.4	108.47	34.252	42.828	24.316	201	7.42	878	993	295	1037	4	875	744	3.684	3.002	36.475	3.752	475	358	280.5	8.72	39	87.4	727	1367	190	26.42
35466	2	2	25	1	1.5	1	1	2	2		2	1	2	2	1.5	7.4	198	2151	84.56	328.53	137.34	26.6	58.54	23.195	19.063	10.116	237	5.97	713	1362	1939	6622	461	9926	1651	2.74	3.19	26.225	2.431	916	672	274	8.48	223.2	94.8	1934	1785	383	24.16
35469	1	1	45	5	5		2	2	2		2	1	1	1	2.9	4.2	307	1769	71.96	302.73	160.88	15.7	32.69	6.467	13.42	9.512	152	8.63	235	340	0	1044	404	17743	662	1.32	1.57	31.698	1.442	299	199	193.4	0.64	108.8	52.2	408	947	238	14
35475	2	2	67	4			2	2	2					1	2.8	4.4	302	1042	46.29	151.41	64.5	10.2	29.35	12.457	10.317	3.574	81	4.67	295	368	20	818	131	20715	102	0.965	1.696	12.896	1.32	299	235	145.3	5.05	14.5	19.6	712	933	198	8.26
35482	2	1	40	4	5		2	2	2		2	2	2	2	2.3	4.8	437	924	38.51	157.4	54.6	17.4	18.69	3.125	5.798	7.512	69	3.42	207	307	98	949	394	3577	854	1.331	1.35	20.624	1.338	480	310	121	1.62	116.4	57.3	608	616	188	16.14
35485	1	2	85	1	2.04		1	2	2					2	1	4.3	253	1980	49.96	278.38	136.76	13.9	76.83	19.245	39.462	12.312	159	3.08	301	387	16	1028	4	0	1972	1.323	1.778	21.326	1.707	425	319	193.6	2.74	32.4	46.3	262	732	176	16.68
35486	1	1	36	3	2.03		2	2	2		2	1	2	1	2.2	3.1	170	4041	170.98	522.47	227.03	25	126.72	27.913	51.768	36.698	1352	19.21	3794	5616	507	21468	239	42	31617	2.847	4.545	61.082	4.297	1715	403	1024.6	22.28	408.8	1866.6	1430	2236	498	41.6
35488	1	1	43	2	2.96		2	2	2		2	1	2	1	1.8	6	298	3119	81.68	333.32	138.47	13.5	94.3	22.402	52.016	18.355	195	5.98	0	0	0	0	0	0	54	1.031	1.683	47.418	3.133	306	8	487.8	1.32	8.7	44.6	312	1645	358	6.14
35489	1	1	27	1	0.76		1	2	2		2	1	2	1	1.9	4.1	308	2173	73.84	331.09	128.59	28.2	65.89	24.497	26.157	9.591	184	4.72	174	932	2649	6818	1484	620	1632	1.204	1.161	18.081	1.67	291	100	219.6	4.02	155.4	56.1	815	1561	304	13.07
35490	1	2	35	5	5	2	2	2	2		2	2	2	2	1.9	4.5	231	2286	90.03	305.02	91.7	25.7	81.4	31.492	30.56	12.28	401	6.55	446	564	356	1060	388	1682	869	2.202	2.431	18.009	1.39	539	232	372.9	3.37	109.1	46.6	1322	1514	349	17.36
35493	1	1	69	4	3.79		2	2	2					2	0.9	6.3	210	1744	50.02	190.34	44.62	14.5	69.18	20.223	31.6	12.52	88	2.87	534	539	1	58	3	1	268	1.731	1.496	27.996	3.025	599	418	233.6	7.67	62.4	33.6	388	834	286	37.69
35495	2	2	76	1	1.07		1	2	2					2	2.7	3.2	135	632	28.93	77.97	47.8	5.3	23.19	7.993	7.407	5.629	74	2.21	85	98	0	157	0	9072	26	0.263	0.576	6.187	0.481	61	2	95.5	1.13	8.4	11.5	349	526	86	3.01
35497	2	1	24	2	1.86		2	2	2		2	1	2	1	1.9	4.2	225	1496	44.75	236.66	114.53	11.8	41.37	21.592	10.302	5.937	99	6.36	574	629	64	616	0	11341	122	1.254	2.143	16.426	0.766	330	205	166.8	3.1	5.1	35.3	1107	915	245	7.42
35500	1	2	39	3	4.22	2	2	2	2		2	2	2	1	2.6	2.1	344	2982	110.76	416.23	233.24	18.1	100.43	36.693	34.336	16.51	277	6.94	640	709	131	749	19	3252	500	1.769	3.107	35.821	3.299	553	329	421.3	10.1	115.8	62.4	769	1713	343	25.96
35501	2	2	54	5	5	2	2	2	2					2	2	2.5	287	2507	111.46	362.66	127.73	17.6	70.87	17.372	30.374	16.552	700	9.22	2064	2152	51	992	108	4059	1057	2.838	5.277	33.1	3.738	533	241	640.2	12.38	41.3	66.8	2477	2960	368	25.39
35504	1	2	22	4	2.12	2	2	2	2		2	2	1	1	4.2	8	322	1252	81.24	56.59	11.05	0.8	12.63	3.219	3.934	3.307	341	2.01	84	93	13	85	29	1095	27	0.312	0.799	27.451	1.812	175	0	468.2	1.95	2.5	30.5	319	844	255	5.86
35505	1	1	30	4	2.93		2	2	2		2	2	2	1	2.2	8.1	271	2545	125.14	230.98	47.62	19.1	79.09	30.776	31.43	10.174	314	2.92	174	184	23	128	0	579	92	2.21	4.587	56.969	4.163	460	120	579.9	10.22	13.9	27.4	979	1486	420	14.58
35506	1	1	38	3	5		2	2	2		2	1	2	1	2	3.7	188	2837	77.07	238.05	46.2	14.9	82.22	23.203	31.627	20.865	141	6.77	187	323	59	1567	78	6731	2322	1.308	1.822	33.178	2.644	508	140	511.2	3.18	16.6	77.2	821	1442	404	10.86
35507		2	85	4	4.37		1	2	2					2	2.6	7.1	255	1476	42.91	218.88	117.55	12.3	50.83	20.747	16.129	8.665	125	3.87	239	301	18	650	154	11034	382	0.95	1.787	16.46	0.881	238	106	167	16.42	61.7	38.9	480	825	160	13.39
35509	1	1	43	3	4.28		1	2	2		2	1	2	1	2.3	5.4	331	2520	91.17	313.8	100.06	45.7	86.1	27.277	32.501	20.454	167	8.68	244	461	121	2487	153	14460	778	1.877	1.92	26.126	2.42	606	140	287.1	1.08	172.7	80.9	1124	1805	493	18.78
35510	2	2	37	2	2.18	1	2	2	2		2	1	2	2	2.5	1.5	371	2033	75.07	186.89	88.28	6.2	111.14	39.906	40.342	20.518	245	5.38	346	383	14	205	423	3	792	1.271	1.259	17.017	1.097	333	61	188	1.96	238.3	33.6	1194	1519	224	8.74
35513	1	2	26	4	5	1	2	2	2		2	1	2	2	1.9	9.8	272	1909	60.31	295.24	85.45	28.4	59.5	25.588	14.601	14.08	121	4.21	343	384	50	428	24	7719	494	1.871	4.933	13.487	1.585	520	410	148.6	3.02	33.5	11.7	669	1065	313	25.48
35515	2	1	58	4	3.9		2	2	2					2	1	2.3	235	1038	59.85	101.48	50.28	9.9	43.46	10.721	18.141	11.015	117	5.43	74	166	12	1117	12	14493	1490	0.779	1.7	13.614	0.912	170	66	206.5	2.04	21.3	49.3	380	658	159	10.04
35517	1	1	73	3			2	2	2					1	2.5	5.5	340	2080	79.51	190.16	124.17	14.9	120.44	26.009	63.546	23.368	136	3.62	76	103	0	307	20	0	216	0.981	2.229	17.909	1.726	353	0	360.4	0.47	185.5	607.6	380	1352	650	14.09
35521	1	1	25	3	1.74		2	2	2		2	1	2	2	1.5	4.7	240	3511	106.23	437.95	198.38	18.3	151.43	51.214	60.76	29.393	326	4.96	317	782	259	5409	51	1141	834	2.243	2.582	26.071	1.051	567	336	291.5	5.59	19.6	132.1	1055	1644	254	22.37
35522	2	2	85	4	1.31		1	2	2					2	1.1	3.4	229	1124	44.48	130.27	43.02	7	47.67	20.926	14.65	8.214	299	3.03	281	297	15	197	26	386	333	0.931	1.001	10.906	0.528	218	141	229.6	1.82	7.3	17.7	320	695	132	10.67
35525	1	1	43	3	1.17		1	2	2		2	1	2	1	2.9	3.4	295	1576	109.14	103.28	16.95	9.2	61.55	21.833	25.903	7.53	186	1.85	96	122	0	319	3	0	567	1.371	2.024	17.294	1.516	189	52	436.6	2.51	39.4	20.5	516	844	228	8.31
35528	1	1	71	3	0.52		1	2	2					1	1.8	5.4	200	1309	49.79	187.48	92.03	21.7	44.43	14.747	13.764	10.968	246	4.23	151	188	2	445	10	0	1666	0.875	1.164	10.885	1.087	290	11	287	1.07	88.4	76.4	712	993	273	9.76
35529	1	1	50	4	5		2	2	2					1	3.8	4.2	260	1973	69.82	250.92	54.73	12.9	55.69	13.666	20.597	16.05	83	7.97	152	373	846	2217	5	554	805	1.897	3.089	33.475	1.988	544	288	356.3	4.4	21.2	42.1	478	854	320	19.41
35530	1	2	44	3	2.21	2	1	2	2		2	1	1	1	1.9	4.1	413	2296	73.93	283.11	102.3	12.3	98.47	20.155	36.344	34.298	385	6.26	160	295	565	1337	16	62	453	1.864	2.328	22.788	1.174	397	229	285.5	1.67	51.1	132.2	564	1399	181	15.47
35531	1	1	40	3	1.31		1	2	2		2	1	1	2	2.4	4.3	246	7281	208.24	801.59	117.36	36.4	231.11	81.383	90.513	44.686	348	18.21	678	787	20	1312	14	41694	866	5.178	6.675	78.051	5.204	1211	575	844.4	11.65	111.3	129.7	2637	3590	739	39.82
35535	2	2	85	5	1.25		1	2	2					2	1.3	4.4	241	1679	80.5	260.7	154.07	22.8	37.83	7.679	13.009	11.614	27	6.99	1021	1866	40	10110	0	10989	1314	2.521	3.047	24.457	2.95	331	91	278.6	8.14	81.4	40.6	1845	1905	395	15.59
35537	2	2	53	5	5	2	2	2	2					1	1.6	3.6	240	2718	129.19	255.06	86.3	21.6	134.14	43.613	49.712	27.62	741	9.69	857	1063	51	2442	42	163	2226	1.616	2.791	25.701	3.166	452	129	707	10.68	155.2	340.2	738	1773	289	17.65
35541	2	2	25	3	1.78	2	1	2	2		2	1	1	2	1.8	3.8	343	1958	40.88	199.54	98.38	10.2	74.5	25.669	26.586	15.406	443	7.68	332	365	8	340	88	8603	421	0.667	1.214	11.16	1.13	181	33	287.7	1.43	131.2	33	486	748	179	7.09
35543	2	2	54	4	3.73	2	2	2	2					2	1.4	2.5	299	1245	23.82	131.88	53.21	9.4	73.4	12.444	38.356	18.929	10	9.14	227	228	9	20	0	0	205	1.083	1.106	12.702	1.003	222	140	79.8	2.27	7.4	15.9	300	654	238	6.44
35545	2	2	24	4	3.01	1	2	2	2		2	1	2	2	1.4	7.6	277	1651	51.17	231.43	117.5	6.6	60.34	17.575	20.489	17.409	120	4.73	145	182	33	430	29	6539	236	1.014	0.946	15.671	0.82	262	160	126.1	2.16	62.6	38.5	559	733	122	9.01
35547	1	1	73	5			2	2	2					2	2.4	4.1	260	2172	76.15	342.91	169.55	30.3	60.96	12.585	16.209	26.012	199	12.49	517	749	533	2209	630	11341	5304	2.128	2.79	35.261	3.32	630	329	280.5	5.21	238.2	159.3	629	1186	396	18.9
35548	1	2	24	4	1.02	1	2	2	2	1	2	2	2	1	1.4	4.1	165	3219	138.98	324.14	126.7	17	151.75	50.486	64.062	27.266	447	8.79	443	516	18	853	5	0	1939	1.424	2.377	45.398	2.573	309	114	436.2	4.28	56.6	155.8	1252	2324	333	13.47
35549	1	2	70	3	1.94		1	2	2					2	2.2	4.3	304	972	33.45	129.26	64.71	5.2	36.79	10.786	16.189	6.149	107	1.25	61	88	13	305	6	1910	167	0.541	0.7	9.321	0.51	136	72	117.1	1.32	3.3	22.4	231	550	93	6.25
35550	1	1	24	3	0.75		1	2	2		2	1	1	1	3	3.3	287	5442	134.46	568.67	219.99	23.5	293.81	86.958	118.854	72.642	276	12.8	137	447	866	2590	1372	7268	1838	3.576	3.2	44.82	2.592	795	435	403.6	4.84	431.5	160.4	968	1761	393	36.25
35551	2	2	80	2	0.91		1	2	2					2	1.4	4.3	254	831	27.59	141.23	79.65	5.5	20.01	7.292	8.28	2.741	53	0.61	369	398	33	136	4	2506	428	1.513	1.945	18.797	2.037	308	231	88.9	6.38	23.4	3.5	516	509	97	15.79
35552	1	2	23	3	1.09	3	2	2	2		2	1	1	1	3.5	5.1	222	1335	32.49	135.64	62.55	5.7	74.33	23.393	28.764	18.565	63	4.57	323	405	194	739	260	610	537	0.996	1.881	10.85	0.975	232	138	117.3	2.6	44.3	64.4	824	849	209	7.47
35554	1	1	20	4	5		2	2	2		2	2	2	2	2.3	5.7	313	1801	47.38	238.81	160.41	9.4	76.79	16.492	21.728	30.709	114	9.61	727	809	24	794	65	3246	962	3.664	2.63	25.381	2.499	466	329	190.6	7.2	31.2	152	987	901	146	20.84
35558	2	2	84	1	0.98									2	1.8	3.1	215	752	25.98	106.03	21.93	4.3	24.64	5.341	7.885	9.845	59	2.86	91	91	0	9	1	0	61	0.596	0.532	9.742	0.866	136	91	111.4	2.48	13.1	21.5	427	493	111	3.67
35559	2	2	62	3	0.67		1	2	2					2	2.4	3.1	238	2517	72.26	353.28	171.21	22.5	93.15	29.022	36.419	20.642	160	11.01	2856	2903	13	524	119	28644	309	3.063	4.33	45.213	4.179	378	214	263	6.77	127.4	70.3	2223	1919	287	24.77
35564	2	2	66	2	1.16		1	2	2					1	3.2	5.4	400	845	31.35	77.55	26.84	5.4	46.5	21.939	18.582	2.664	107	0.99	164	352	18	2256	1	0	62	0.496	1.208	8.197	0.509	108	36	132.3	2.24	45.7	10.4	273	561	93	5.44
35567	1	1	47	4	2.65		2	2	2		2	1	1	1	2.5	4.8	304	1807	81.77	186.27	107.31	9.1	83.38	32.36	29.087	12.296	513	7.92	487	590	243	1094	7	0	613	0.54	0.993	19.322	3.106	193	22	436.5	6.92	31.8	81.2	486	973	222	10.29
35569	1	1	85	3	3.9		2	2	2					2	1.3	5.3	237	1582	74.72	171.6	97.96	11.8	49.21	20.853	16.531	7.538	208	2.92	565	606	54	447	60	356	347	0.969	2.178	25.682	2.013	321	187	301.3	4.84	28.6	57.2	1009	1198	221	10.28
35571	2	2	22	4	4.75	2	2	2	2		2	2	2	1	1.6	5.1	260	1954	68.78	260.17	117.67	11.1	71.76	26.395	28.07	11.005	317	4.24	274	309	77	370	3	1544	724	1.848	2.056	30.03	2.03	883	748	283	1.86	30.7	26.4	496	1201	165	21.4
35572	1	1	40	3	5		1	2	2		2	1	2	2	1.8	4.1	233	1456	62.08	171.5	71.32	13.9	62.01	12.967	29.064	16.451	94	5.71	116	300	480	1936	50	2167	1388	1.168	0.739	18.725	1.893	258	128	161.1	0.36	86.2	107.9	491	876	227	10.26
35573	2	2	63	1	0.94		1	2	2					2	1.8	4.8	268	1936	61.52	241.77	127.97	17.5	81.91	33.122	27.318	15.227	134	4.83	503	659	538	1672	31	2709	415	1.398	2.37	9.116	1.301	337	91	210.8	4.16	119.9	52.2	1483	1466	267	9.43
35575	2	2	33	1	0.57	2	1	2	2		2	1	2	2	2.4	3.9	295	1050	40.21	163.58	68.7	15.8	28.49	10.552	9.503	4.72	76	2.32	446	612	582	1602	164	2779	558	1.483	1.976	19.135	2.039	387	279	138.8	4.84	124.9	17.1	762	850	218	15.59
35577	1	2	38	3	4.17	2	2	2	2		2	1	2	1	2	6.1	458	2651	86.71	147.11	54.65	12.3	182.38	49.515	62.291	57.645	285	9.7	249	734	1746	4961	0	7	738	1.576	2.055	24.544	1.953	258	15	379	4.47	26.5	121.6	569	1337	304	11.49
35578	1	1	68	5	2.5		2	2	2					1	1.2	4.5	263	1206	25.4	160	62.26	14.5	19.44	6.544	7.453	3.349	50	1.2	24	122	72	1062	163	2379	333	0.943	0.572	6.497	0.651	278	92	136.5	0.28	71.3	11.8	260	566	261	8.59
35579		1	61	1	0.65		1	2	2					1	2.7	3.3	360	1821	45.66	287.61	83.76	40.6	47.1	15.189	18.735	9.64	34	2.23	0	8	0	87	25	1636	72	0.966	0.498	7.176	1.36	426	0	201.1	0.18	23	20.8	370	1248	401	9.93
35580	1	2	44	5	3.13	2	2	2	2		2	2	1	2	2.9	5	385	4499	136.61	644.03	297.64	63.4	167.11	49.954	66.59	41.375	256	32.07	1470	1681	208	2445	4	37153	1042	2.68	4.293	48.446	2.472	517	185	547	7.14	14.1	199.7	2600	2740	790	22.98
35584		1	25	2	1.25		1	2	2		2	1	2	1	2.7	6.4	333	5502	185.27	742.75	231.19	73.4	198.6	61.771	75.414	43.96	292	11	493	569	49	860	13	20158	731	4.917	3.962	52.177	2.252	952	648	520.3	5.33	66.6	94.7	2061	2590	618	45.17
35586	1	2	67	2	0.82		2	2	2					2	1	2.4	137	1272	67.84	154.76	40.62	11.4	43.08	12.796	16.051	10.456	181	2.47	539	548	2	90	46	0	200	1.621	1.991	21.15	1.538	443	359	199	4.46	24.7	19	806	1301	259	18.57
35588	2	2	67	3	0.75		1	2	2					1	3.7	4.4	241	1358	62.93	117.6	12.69	19.5	72.77	19.317	35.432	7.806	154	6.93	17	161	435	1490	40	1274	815	0.936	1.3	16.971	1.364	292	89	183.1	4.9	25.4	83.6	436	866	240	12.5
35592	1	2	85	1	1.95		1	2	2					2	1	2.8	274	1451	47.41	201.29	62.23	7.4	49.22	13.121	19.701	12.21	76	2.76	20	20	1	4	1	0	58	1.575	1.03	12.579	0.554	313	247	114.1	1.23	0.8	24	231	616	105	8.81
35593	1	1	39	5	1.2		1	2	2		2	1	2	2	3.1	6	312	1767	142.59	187.34	17.42	4.7	34.23	7.946	10.508	11.203	253	5.51	284	330	14	521	31	0	177	2.958	1.781	51.406	3.509	477	267	502.6	36.44	30	42.5	460	1529	391	26.17
35594	1	2	49	5	5	2	1	2	2		2	2	1	1	3	4.3	308	2039	73.43	306.16	165.92	26.8	51.75	20.092	16.083	11.12	367	6.74	370	848	780	5238	234	17335	5990	1.475	2.455	21.795	1.603	404	135	320	2.12	71.6	300.1	1350	1217	397	17.26
35602	2	2	85	3	1.25		1	2	2					2	2	7.4	345	1330	58.21	170.4	94.7	11.2	49.29	18.873	14.71	10.646	128	3.92	629	694	51	638	299	2274	580	1.653	2.071	18.561	1.51	281	113	224.7	3.76	63.4	41	992	1135	232	13.75
35604	1	2	25	3	1.63	3	2	2	2		2	2	2	2	2	5.7	286	1504	68.91	166.92	50.55	10	63.27	26.288	20.491	12.479	198	2.74	281	304	12	247	18	0	294	0.98	1.325	18.594	1.051	264	124	162.5	2.21	76.5	42.6	1111	1149	166	8.99
35607	1	1	48	4	4.22		2	2	2		2	1	2	2	3.4	6.4	220	1528	54.59	122.4	7.49	6.2	55.77	19.476	24.483	7.679	142	2.34	68	91	41	255	0	1029	154	0.644	1.114	18.349	1.52	216	52	274.6	3.95	13.3	23.7	805	768	254	7.28
35608	1	1	58	2	3.85		2	2	2					2	1.3	1	216	1790	70.07	234.04	67.85	10.4	65.7	22.139	18.197	18.708	115	9.09	82	143	51	310	799	0	708	1.59	2.056	21.414	1.811	398	144	245.7	3.42	240.1	53.6	1544	1095	257	15.19
35609	2	2	64	4	3.03		2	2	2					1	1.8	5.3	397	904	26.37	114.85	48.88	5.7	39.68	16.361	14.087	5.909	52	2.9	135	172	1	450	0	19231	194	0.663	1.147	7.666	0.332	129	87	107.4	1.27	22.7	25.7	555	529	114	7.21
35612		1	42	5	4.9		1	2	2		2	1	2	1	2.3	2.8	217	1300	58.31	198.15	44.77	6.2	28.1	4.628	7.7	12.214	90	3.57	274	274	0	4	1	0	33	1.315	1.024	23.69	1.817	485	368	167.6	2.59	3.2	23.6	1128	955	292	13.72
35614	1	1	73	3	1.79		1	2	2					2	0.9	2.5	182	2107	159.26	186.17	86.98	15.1	81.53	30.626	30.54	11.367	551	5.47	394	549	44	1845	20	6787	713	1.665	3.455	24.38	2.063	313	62	654.4	10.04	54.1	287.8	1279	2285	293	18.83
35616	2	2	51	5	4.1	2	2	2	2					2	2.2	4.5	366	2342	132.67	199.61	54.82	13.6	111.83	26.257	40.767	33.232	566	7.72	366	408	32	499	6	0	975	2.3	2.473	26.648	3.001	476	264	531.3	12.31	58.3	59	785	2900	327	27.2
35617	2	2	81	3	1.46		1	2	2					1	1.7	2.7	197	865	30.15	123.44	62.15	11.6	30.07	7.222	11.208	10.751	9	4.39	510	820	960	3163	172	0	423	0.959	1.391	11.863	0.935	244	148	84	0.91	9	53.3	457	561	149	11.79
35619	1	1	72	2	0.98		1	2	2					2	1.4	6.2	233	1308	54.39	166.3	101.01	9.3	49.85	21.477	18.145	4.851	190	3.39	178	406	31	2610	225	18909	187	0.824	1.264	13.84	0.9	156	76	186.2	3.72	55.3	41.2	576	733	156	8.84
35620	1	2	83	4	3.13		2	2	2					1	2	3.1	310	1766	49.79	233.29	97.23	14.6	53.71	13.95	23.981	10.756	116	6.15	499	852	904	3747	80	25125	1715	1.701	1.979	31.147	2.567	461	261	207.2	5.56	96.8	68.9	257	774	262	26.26
35621	1	2	20	4	3.12	2	2	2	2		2	1	2	1	3.3	4.7	311	2317	52.31	337.62	280.63	3.4	87.43	20.514	27.76	33.296	201	6.33	151	240	248	972	63	3117	345	0.881	0.889	15.078	1.015	111	56	172.3	1.44	263.4	116.9	673	659	113	6.37
35624	1	2	62	4	1.04		2	2	2					1	1.5	3.4	250	1380	44.9	158.33	77.17	7.9	30.45	10.926	12.277	4.771	76	2.65	387	687	1125	3030	37	0	1356	0.721	1.869	9.605	1.21	203	56	244.8	3.37	112.6	98.3	949	1011	218	6.26
35625	1	2	63	3	5		1	2	2					2	2.5	4.3	371	1703	55.26	194.59	69.7	16.8	63.6	15.046	25.01	17.295	311	8.76	370	703	794	3498	221	11784	2370	1.322	2.032	16.623	2.428	518	292	320.6	6.75	102.7	136.1	701	974	316	13.37
35628	2	2	28	3		1	1	2	2		2	1	2	2	1.5	5.7	227	3944	122.38	537.95	232.75	54.8	152.23	46.718	56.449	37.134	579	13.19	474	528	48	429	514	937	1125	2.621	3.574	24.712	3.939	756	65	660.6	8.39	460.7	94.1	2613	2701	716	17.75
35632	1	1	41	5	5		2	2	2		2	1	2	2	1.2	3.5	300	2994	91.02	392.14	171.73	15.5	117.21	36.769	37.198	27.679	162	9.88	167	207	57	439	2	10150	377	1.839	1.58	30.27	1.619	362	203	191.2	3.11	22.9	55.3	1231	1607	298	15.76
35633	2	2	58	5	0.33	2	2	2	2					1	1.9	4.9	317	1992	113.17	215.05	125.05	14.3	79.56	38.638	23.404	11.35	499	7.72	529	1151	2554	6207	4	1	562	1.232	2.535	16.64	1.745	274	50	354.1	16.29	44.3	55.1	2522	2300	318	10.65
35638	2	2	37	2	3.03	3	1	2	2		2	1	2	2	1.4	1.8	205	626	22.33	91.35	27.04	7.1	20.58	6.254	7.606	5.238	45	2.79	304	361	54	600	105	772	898	1.209	1.475	13.786	1.592	300	212	84.4	4.22	58.7	20.6	290	362	92	12.36
35642	1	1	20	3	4.97		1	2	2		2	2	2	1	3.3	3.8	269	3377	138.31	433.94	162.54	26.9	98.99	30.579	44.376	15.762	803	7.8	426	505	149	842	42	2820	1204	2.767	2.834	35.314	2.402	596	283	740.3	3.88	100.3	64.6	1303	1990	410	22.44
35646	1	1	46	5	3.63		2	2	2		2	2	2	2	1.3	3.1	251	2861	104.76	357.08	143.82	24.4	105.19	34.332	41.56	22.376	201	12.44	879	984	17	1247	15	32804	271	1.957	2.711	34.561	2.436	476	254	423.8	7.35	58.6	90.8	952	1704	488	29.31
35651	1	1	31	5	3.9		2	2	2		2	2	2	2	1.8	3.2	409	4884	239.55	484.18	177.86	26.7	222.94	87.176	82.359	38.902	594	16.56	1683	2783	3979	11128	171	4351	2297	3.25	5.209	67.132	4.115	761	407	661	8.66	122.3	291.1	2459	3279	473	29.36
35652	1	1	65	1	0.78		1	2	2					1	1.6	4	291	2788	87.08	411.72	172.44	26.4	92.55	38.894	28.081	18.502	199	6.19	392	451	102	657	21	2222	516	2.381	2.301	24.245	1.376	487	188	231.7	2.36	42.7	53.7	1122	1703	385	16.01
35654	2	2	56	1	2.35	2	1	2	2					2	3.2	4.5	336	1238	92.6	171.08	44.89	22.3	21.04	7.27	6.093	5.006	162	3.23	588	1070	1884	4851	5	1432	1044	1.29	1.773	36.775	2.561	386	97	330.8	2.08	70.3	103.2	844	1437	379	13.78
35655	1	1	42	2	1.9		2	2	2		2	2	1	1	2.1	3.2	254	2343	108.03	226.96	81.67	17.7	98.87	30.872	42.541	16.376	642	6.68	285	419	46	1065	997	5832	2270	2.505	2.224	28.551	2.511	484	103	649.6	4.53	266.4	62.8	1197	1307	340	16.24
35657	2	2	29	5	2.33	1	2	2	2		2	1	1	2	1.2	8.8	243	2355	109.03	262.24	103.91	10.1	96.04	25.418	38.586	22.794	411	8.51	191	227	1	432	7	0	811	1.252	1.337	33.865	2.281	352	117	299.3	1.75	62.4	69.7	298	1010	219	12.16
35659	1	2	53	3	5	2	2	2	2					1	2.1	2.1	353	2686	64.3	378.19	234.02	25.8	110.67	27.805	41.019	34.731	98	19.72	349	686	50	3800	429	628	668	1.442	1.539	21.02	1.571	428	90	241.7	1.81	267.3	67.1	832	1585	461	16.68
35664	1	1	48	2	0.65		1	2	2		2	1	2	1	4.1	3.4	278	1440	68.26	209.53	28.24	14.3	34.56	10.408	12.983	8.788	94	2.75	176	299	484	1241	0	317	418	1.311	1.012	17.827	1.441	506	260	243.8	3.48	8.9	40.9	513	983	250	13.34
35667	2	2	73	4	1.43		2	2	2					2	2.4	6.2	420	629	26.95	90.06	62.22	4.8	19.07	10.206	5.88	1.397	67	0.96	186	453	1138	2635	1	1029	269	0.332	0.742	7.273	0.459	73	16	94.1	1.81	11.4	10.1	493	566	101	3.47
35668	1	2	81	3			1	2	2					2	2	4.3	235	998	45.68	136.6	47.45	7.4	29.96	10.223	10.616	5.207	104	1.21	44	44	0	9	1	0	122	1.044	1.362	12.677	0.791	192	90	164.1	3.06	4.6	9.3	380	658	166	8.5
35673	2	1	71	4	2.34		2	2	2					2	1.5	5.1	225	1836	62.18	281.74	165.2	17.4	58.38	16.127	18.981	18.901	155	5.34	579	696	355	1213	55	8510	502	1.862	2.679	25.382	2.308	428	310	215.8	6.85	29.9	45.8	956	1217	261	22.22
35675	2	2	70	3	1.21		2	2	2					2	1.9	4	437	1048	52.17	151.68	35.51	18	25.53	6.83	7.897	6.831	91	6.61	98	337	652	2531	3	13965	684	1.054	1.067	21.08	1.09	298	159	159.2	1.08	30.9	73.7	483	721	255	8.8
35676	1	1	21	5	1.29		2	2	2		2	2	2	2	2.2	3.9	308	1525	44.71	192.89	76.84	7	65.77	20.532	22.941	16.276	353	6.13	376	385	2	104	6	166	252	1.424	1.813	14.389	1.154	271	186	205.9	3.45	8.6	23.6	683	1416	135	12.46
35679		1	50	4	4.49		2	2	2					1	2.9	4.6	257	2584	208.02	265.93	160.82	21.5	76.74	16.454	21.118	31.217	443	11.92	56	625	0	6850	2	273	9913	1.238	1.95	60.81	4.388	643	70	638.1	2.23	202.9	746.8	560	1802	374	16.48
35684	1	2	42	1	5	2	2	2	2		2	1	1	1	2.7	4.6	434	2414	149.11	170.9	46.16	19.3	128.6	40.025	49.153	24.003	467	10.13	231	2677	10680	24004	9	2983	2225	1.628	1.851	30.24	2.7	216	6	536.9	7.3	37.5	108.7	791	1542	392	15.8
35685	1	1	51	4	1.72		1	2	2					1	2.6	3.9	205	2115	91.94	207.46	86.32	8.2	83.9	22.096	31.613	22.762	476	6.17	237	611	1520	3669	145	758	732	1.188	1.479	25.176	1.601	271	92	406	3.29	170.4	63.5	920	1034	253	10.51
35686	1	2	54	3	0.46	2	2	2	2					1	2.9	5.9	206	1364	64.44	155.6	104.88	8.8	55.54	20.778	17.3	11.071	548	4.29	316	587	1083	2740	21	0	829	0.868	3.07	11.363	1.193	182	22	453.6	5.24	33.1	32.4	964	1216	207	7.73
35687	1	2	70	5	5		1	2	2					1	0.6	2.3	261	2413	91.32	337.36	143.12	21.7	65.02	23.342	24.671	11.714	274	21.28	638	1188	994	6026	93	1332	5399	3.275	3.663	43.472	3.98	1022	667	334.1	9.97	104.5	312.2	974	1392	334	35.43
35688	2	1	85	3			1	2	2					1	1.7	2.7	62	1374	61.86	175.32	73.82	6.9	46.7	13.538	17.974	11.254	208	3.84	256	269	13	129	3	0	121	1.184	1.608	18.084	1.224	183	97	223.5	21.34	18.5	30.2	487	910	147	12.7
35689	2	2	71	1	3.18		2	2	2					2	2	3	316	1625	54.19	267.19	159.63	27.2	45.8	15.817	15.195	11.739	135	3.17	523	556	29	204	342	204	556	2.01	2.491	24.127	3.159	359	205	260.9	5.61	135.2	25.5	908	1228	395	24.03
35690	1	2	35	5	5	2	2	2	2		2	1	2	2	2.1	2.5	246	900	34.16	121.74	92.96	10.4	33.43	5.291	12.308	13.775	72	7.2	49	263	256	2245	385	877	2023	0.546	0.622	15.544	1.355	230	0	157.4	0.29	197.8	233.7	496	395	130	4.43
35691	1	1	46	2	1.77		2	2	2		2	2	1	1	2.1	5.6	275	2955	94.6	321.63	96.32	17.1	83.75	18.77	33.276	25.542	276	9.14	102	210	331	1135	5	10477	216	1.556	1.633	34.173	2.319	437	200	421.6	4.27	30.4	125.4	421	1256	317	12.67
35692	1	2	23	5	3.79	2	2	2	2		2	2	2	2	2.6	4.1	278	2047	55.9	254.41	119.48	10.5	90.31	26.963	28.285	27.685	119	6.77	287	315	0	316	5	8927	203	1.171	1.478	12.526	0.499	300	174	157.3	1.9	19.8	89	777	831	168	10.93
35695	1	2	30	4	0.97	1	1	2	2		2	1	2	1	1.8	6.8	315	2865	123.24	339.73	100.81	20.8	114.75	36.528	43.178	25.293	567	12.24	1067	1138	68	754	141	7755	648	2.42	3.758	23.879	2.897	573	344	515.3	10.52	38	74.8	1889	2109	348	18.08
35696	1	2	51	5	5	2	2	2	2					2	1.7	4.5	374	1528	80.74	126.62	30.67	8.5	43.56	14.912	14.192	9.688	528	5.86	426	765	1248	3432	26	5984	774	1.361	2.441	18.804	1.488	315	113	399.9	3.69	19.6	61.5	816	1171	238	13.59
35701	1	1	40	1	3.12		1	2	2		2	1	2	1	2.5	6.2	219	1926	95.07	286.63	93.97	14.2	33.31	9.84	11.335	7.181	317	4.65	96	140	44	435	199	7317	717	1.871	1.78	29.721	1.31	496	261	291.4	1.13	89.3	24.7	418	965	241	14.42
35703	1	1	20	4	2.62		2	2	2		2	2	2	1	2.3	3.5	163	2589	107.9	364.95	152.35	19.4	80.52	24.759	29.516	18.55	238	5.97	226	266	39	447	1	11498	177	1.655	1.633	32.546	2.107	329	177	234.7	2.37	29	41.7	718	1586	257	16.3
35704	1	2	29	5	2.08	2	2	2	2		2	2	2	2	3	3.6	405	2907	124.89	320.39	147.65	14.7	126.52	41.803	47.013	27.08	613	5.23	325	349	6	260	6	3990	333	1.658	2.271	27.049	1.646	348	216	481.3	5.96	34.9	74	642	1265	242	21.19
35708	1	2	66	3	2.04		1	2	2					2	2.3	2.8	314	2152	65.88	328.35	189.74	20.2	69.17	17.988	25.321	20.536	147	9.43	773	966	157	1952	579	6715	1067	2.195	2.65	16.128	1.507	430	128	331	5.72	242.6	119.4	2034	1307	336	23.8
35709	2	2	45	3	3.1	2	2	2	2		2	1	2	1	2.3	5.7	218	2138	71.81	218.03	122.31	11.6	116.35	39.83	47.624	23.239	168	12.18	340	348	0	80	1	0	78	0.785	1.844	20.977	0.856	205	69	186.6	2.08	1.9	11.8	1154	1385	283	7.64
35710	2	2	29	5	1.56	1	1	2	2		2	1	2	1	2.7	6.2	457	4379	140.76	667.91	360.16	38.1	138.1	36.594	43.749	45.699	509	12.82	673	1095	83	4399	1328	1339	1772	3.074	3.612	44.119	3.284	936	402	670.1	7.91	251.7	124	1442	2269	560	31.01
35713	1	1	28	3	3.43		2	2	2		2	1	2	2	1.8	2.4	225	3865	144.68	498.02	265.79	13.7	112.8	26.714	45.627	31.078	317	7.48	130	188	30	634	81	10604	349	3.053	2.215	43.829	4.442	272	58	676.9	5.28	200.7	87.7	472	2009	354	14.23
35715	1	1	41	4	3.1		2	2	2		2	1	2	1	2.1	2.6	322	3541	112.57	360.93	96.78	22.2	176.35	52.64	76.926	34.005	950	9.49	441	477	25	408	55	3376	770	2.138	3.389	30.546	2.999	516	192	729	7.56	42.4	94.8	1087	1965	377	21.09
35718	2	2	77	3	1.87		1	2	2					2	2.9	4.1	227	2335	60.69	287.97	157.16	11.4	108.01	29.532	39.633	32.05	391	7.66	264	275	2	114	6	2234	288	1.129	2.102	15.604	0.678	331	156	349.7	1.56	8.4	102	835	1381	239	12.71
35719	1	1	48	3	5		1	2	2		2	1	1	1	1.3	1.4	260	2319	94.04	251.31	89.95	15.5	97.96	22.233	31.104	34.725	223	6.24	90	327	925	2373	2	1253	881	1.842	2.369	28.457	2.211	179	45	332	2.02	60.9	95	595	1266	305	10
35722	1	2	40	3	0	2	2	2	2		2	1	2	1	2.5	6.1	475	1952	30.32	322.02	245.84	8.8	35.65	10.889	11.727	9.101	91	5.63	79	129	42	558	3	8985	246	0.71	0.641	10.648	0.805	168	93	103.8	1.69	67.6	65.9	278	584	94	8.15
35724	1	2	70	5	5		1	2	2					1	1.4	5.5	467	1555	64.65	168.54	77.81	14.5	71.03	22.892	26.23	15.14	564	6.17	290	1528	153	14601	389	1544	1303	1.583	1.815	17.395	1.934	300	60	442.4	2.24	129.8	48.6	423	1032	251	10.69
35725	1	2	36	3	1.24	2	2	2	2		2	2	1	1	2.3	2.8	247	4173	162.15	392.78	231.97	26.2	232.91	65.319	71.354	79.67	236	8.6	627	698	38	858	3	9821	716	1.939	3.676	35.856	1.977	352	65	417.6	4.29	17	145.7	1404	4492	1773	47.42
35729	1	2	41	4	1.66	2	2	2	2		2	2	2	1	2.1	3.6	300	2135	63.86	360.52	302.88	15.4	53.88	27.751	15.613	6.89	182	1.63	671	694	22	242	0	422	103	1.2	3.087	7.411	0.81	113	43	330.9	5.4	6.2	19.6	1730	1831	237	7.67
35737	1	2	77	5	3.45		2	2	2					1	1	2.5	333	1937	74.23	289.6	152.5	22.8	62.87	19.474	21.107	17.655	151	4.79	597	611	3	158	20	0	265	1.959	2.682	30.654	5.34	725	595	243.7	10.14	52.7	53.6	859	1513	405	21.39
35738	1	2	22	3	2.71	1	2	2	2		2	2	2	1	2.2	8.3	261	1247	62.52	153.36	63.41	8.8	43.01	16.81	14.322	7.97	162	5.21	507	584	11	927	60	19607	475	1.161	2.298	11.67	0.898	281	155	257.5	5.21	23.4	51.5	1311	1239	259	8.18
35741	1	1	30	3	3.73		2	2	2		2	1	2	1	3.3	6.3	327	2656	110.11	347.31	215.67	13.7	95.88	32.107	32.836	23.074	364	3.8	497	587	328	896	31	0	150	1.869	2.928	28.514	1.975	476	200	270.8	4.65	27.7	120.3	1028	1540	331	12.11
35743	1	1	40	5	3.13		2	2	2		2	1	1	2	2.4	5.1	274	1442	50.9	212.17	98.75	11.7	45.09	9.828	13.375	17.521	158	6.99	105	219	13	1338	46	3365	1608	0.945	0.958	18.975	1.702	334	86	210.8	1.45	132.9	211.3	354	592	191	8.31
35745	2	1	66	2	3.11		1	2	2					1	2.4	3.6	273	2157	73.17	298.84	224.35	7.5	77.36	30.1	28.128	9.67	203	4.1	89	90	0	17	5	0	94	0.918	1.503	17.118	0.892	201	116	292.8	4.96	23.2	14.1	415	852	182	12.18
35747	1	1	32	4	3.63		1	2	2		2	1	2	2	4.3	4.3	326	1381	35.13	119.11	53.7	14.9	90.63	33.282	26.995	23.602	93	6.47	132	147	40	161	7	1608	738	0.352	0.913	4.295	0.441	64	14	128.2	1.63	15.3	20.6	361	686	200	6.92
35750	1	1	33	2	1.28		2	2	2		2	1	2	1	1.9	5.4	352	2653	83.71	302.07	151.19	11.1	60.64	24.028	23.682	6.393	568	4.94	267	393	236	618	1523	3010	2038	2.41	2.313	27.764	3.349	497	34	701.9	4.19	369.3	59.9	439	1278	391	12.09
35751	1	2	58	3	4.68	2	2	2	2					2	2.3	4.6	272	1863	68.81	210.07	93.01	17.7	60.44	20.187	22.549	13.505	147	7.79	252	625	1106	3932	14	18334	1563	1.463	1.247	22.257	1.539	328	84	251.3	1.17	175.8	85.3	487	879	248	10.6
35755	2	2	22	2	0.88	2	2	2	2		2	1	2	1	1.9	3	195	1397	38.64	136.47	71.3	4.7	79	14.288	27.591	31.09	98	7.56	70	96	23	267	24	2795	154	0.49	0.553	13.459	0.576	111	51	75.7	1.31	5.3	72.4	276	418	106	6.02
35756	2	2	80	3	1.16		1	2	2					1	1.7	7.2	290	782	32.3	81.93	11.08	9.4	38.16	11.913	10.019	12.848	56	2.69	196	203	20	62	5	0	394	0.648	0.772	12.999	0.746	378	315	72.4	0.48	5.2	7.9	424	652	189	16.34
35760	2	1	20	4	2.09		2	2	2		2	1	2	2	2.1	4.4	203	2822	89.26	307.78	146.08	10.9	137.36	55.457	49.659	25.373	461	5.78	596	617	10	207	5	1769	612	1.513	1.793	29.318	1.622	324	135	280.9	4.98	5.3	59.5	673	1125	230	16.54
35763	1	1	46	4	5		2	2	2		2	1	2	1	1.6	5.4	341	2734	115.24	350.93	204.57	38.6	76.17	21.168	29.344	17.84	792	17.01	343	632	62	3428	88	54	4450	1.57	3.141	40.617	3.145	904	0	813.6	8.96	331.6	434.7	896	1837	599	14.22
35764	1	1	59	4	5		2	2	2					2	1.8	4.1	233	1524	90.04	212.45	105.5	27.1	38.33	7.726	14.135	13.058	199	9.19	264	1238	244	11301	575	0	18605	1.146	1.474	32.253	2.276	505	67	349.5	1.67	254.9	1039.8	773	830	258	11.42
35765	1	2	23	5	4.08	2	2	2	2		2	2	2	1	1.7	7.4	180	1048	62.95	137.98	86.43	3.7	28.15	13.959	8.263	3.627	141	1.57	661	668	9	97	11	0	198	1.257	2.857	21.436	2.248	225	146	235.1	7.57	17.6	10.1	1227	1123	187	11.13
35766	1	1	68	2	2.18		1	2	2					1	3.9	10.7	407	3326	84.47	409.07	247.53	18.8	158.18	63.62	53.378	27.9	925	14.93	1005	1065	73	335	701	0	1152	1.28	3.545	13.478	2.891	390	85	663.7	6.2	215.3	51.6	1923	1722	363	10.06
35770	1	2	43	4	0.93	2	2	2	2		2	1	2	1	3.2	4.9	358	1864	59.8	252.19	130.55	13.6	69.41	19.747	18.761	21.754	311	7.27	597	1077	1010	5214	92	2462	3868	1.838	2.38	24.774	2.304	390	172	310.1	1.91	60.1	293.5	275	818	190	11.81
35775	2	2	42	4	3.85	2	1	2	2		2	1	2	1	1.5	2.4	254	2085	97.27	267.71	111.3	25	73.55	21.615	28.229	17.755	271	8.53	358	557	13	2387	14	9022	3535	1.769	3.262	28.324	1.905	496	230	326.8	5.56	84.2	239.6	1457	1780	418	26.87
35778	1	2	47	3	5	2	2	2	2		2	1	1	1	4.8	6	310	1384	57.44	180.66	115.01	5.8	39.94	17.405	14.167	4.954	152	2.1	116	126	4	113	12	0	100	1.866	1.801	15.683	1.403	186	63	256.1	2.13	75.7	10	316	760	201	5.6
35781	2	2	50	3	5	2	2	2	2					2	1.2	3.6	401	968	30.73	139.86	65.21	10	34.35	10.535	12.639	9.128	23	8.28	51	97	30	551	2	7520	489	0.664	0.784	12.03	0.857	199	59	86.9	0.51	81.1	83.3	501	542	231	8.29
35783	2	1	80	5	5		2	2	2					2	1.5	3	278	2120	105.51	309.51	175.16	20.4	52.28	13.814	16.947	13.402	150	15.97	722	980	416	2486	578	1591	2233	1.713	2.359	35.807	4.874	737	449	443.8	11.77	216.5	136.5	1203	1410	323	20.71
35784	1	2	78	1	0.61		1	2	2					1	2.5	3.6	193	1187	50.08	155.16	52.78	5	39.28	11.06	12.938	12.512	86	2.87	530	551	19	253	6	383	126	1.366	2.207	17.01	1.426	339	274	133	4.95	11.3	29.2	816	1027	125	14.96
35785	1	1	49	1	0.51		1	2	2		2	1	2	1	1.6	11.6	330	1107	30.01	218.54	98.77	20.7	16.39	4.018	6.214	4.595	10	2.09	488	524	58	335	20	3285	482	1.222	1.6	15.404	2.072	299	130	130.5	3.5	86.3	27.1	642	791	239	12.39
35788	1	1	72	5	5		2	2	2					2	1.8	3.7	363	2607	99.35	292.24	168.86	10.4	115.27	35.145	43.374	26.601	686	8.81	445	563	362	1163	200	1226	1055	1.537	2.546	25.693	1.785	426	162	596.3	7.93	72.5	61.4	707	1339	301	18.62
35789	1	1	21	3	3.06		2	2	2		2	2	2	1	1.6	4.7	315	2948	104.94	420.05	187.45	22.4	96.17	25.359	40.348	19.757	214	9.2	320	350	6	352	7	545	217	1.693	1.173	35.639	1.636	454	263	262.5	3	96.9	76.4	682	1334	277	20.57
35790	1	1	51	3	3.87		2	2	2					2	2.6	3.2	183	3191	183.88	225.63	84.13	7.3	125.66	46.973	44.628	23.603	895	8.55	501	530	49	314	2	1158	396	3.244	2.113	37.856	3.241	312	80	785.1	8.47	32.3	46.3	959	1999	399	17.96
35792		2	75	3	5									2	1.6	5	226	1027	38.68	138.59	19.95	16	36.25	7.382	12.52	13.904	49	5.59	44	182	14	1657	0	0	2609	1.271	0.745	10.53	0.972	379	155	182	2.21	101.3	243.8	339	705	178	9.15
35793	1	1	43	5	4.55		2	2	2		2	1	2	1	2.6	4.9	424	2099	66.4	273.63	128.96	16.8	85.65	28.339	32.881	17.047	560	5.09	457	507	7	570	16	0	1178	1.391	2.277	14.752	0.929	474	215	384.8	3.54	13.2	66.1	697	1013	222	26.44
35795	2	2	29	4	1.06	1	1	2	2		2	1	1	2	2.2	8.6	314	1682	44.83	272.7	167.61	8.4	47.36	11.225	15.749	15.951	184	4.35	339	378	123	226	331	2	1164	1.384	1.082	15.556	0.827	385	107	192.6	1.85	150.2	65.2	723	740	138	9.89
[truncated: 31,906 more rows]
[truncated: 139 more columns]

## Sheet: Sheet1
Abbreviation	Full names of nutrients	Units
[truncated: 60 more rows]

[truncated: 1 more sheets: Sheet2]
